# Supplementary material
Source: publisher site journal article supplement (https://www.dovepress.com/article/supplementary_file/543386/543386%20Revised%20Supplementary%20Material.xlsx)
Supplement: Supplementary file 1 [file 543386%20Revised%20Supplementary%20Material.xlsx]

## Sheet: 2442 samples
Supplementary Table 1. The whole dataset
Weekdays		Weekends
BT	RT	BT	RT	Mean Age	Country	Method 1	Author(s)	Year Published	Complete Reference	Sample Group 2	Sample No.
20.1167	7.25	20.1667	7.36667	0.5	Germany	0	Randler et al	2012	Randler C, Fontius I, Vollmer C. Delayed weekend sleep pattern in German infants and children aged 0–6 years. Biol Rhythm Res, 2012;43, 225–234.	1	1
19.9	7.15	20.0667	7.36667	1	Germany	0	Randler et al	2012	Randler C, Fontius I, Vollmer C. Delayed weekend sleep pattern in German infants and children aged 0–6 years. Biol Rhythm Res, 2012;43, 225–234.	1	2
21.4	8.1	21.5	8.5	1.5	Iceland	0	Thorleifsdottir et al	2002	Thorleifsdottir B, Bjornsson JK, Benediktsdottir B, Gislason T, Kristbjarnarson H. Sleep and sleep habits from childhood to young adulthood over a 10-year period. J Psychosom Res 2002;53:529–37.	1	3
20.1333	7.2	20.4167	7.53333	2	Germany	0	Randler et al	2012	Randler C, Fontius I, Vollmer C. Delayed weekend sleep pattern in German infants and children aged 0–6 years. Biol Rhythm Res, 2012;43, 225–234.	1	4
21.1	8.3	21.6	8.75	2.5	Iceland	0	Thorleifsdottir et al	2002	Thorleifsdottir B, Bjornsson JK, Benediktsdottir B, Gislason T, Kristbjarnarson H. Sleep and sleep habits from childhood to young adulthood over a 10-year period. J Psychosom Res 2002;53:529–37.	1	5
19.9	7.13333	20.2333	7.48333	3	Germany	0	Randler et al	2012	Randler C, Fontius I, Vollmer C. Delayed weekend sleep pattern in German infants and children aged 0–6 years. Biol Rhythm Res, 2012;43, 225–234.	1	6
19.85	7.08333	20.3333	7.46667	4	Germany	0	Randler et al	2012	Randler C, Fontius I, Vollmer C. Delayed weekend sleep pattern in German infants and children aged 0–6 years. Biol Rhythm Res, 2012;43, 225–234.	1	7
20.0167	6.88333	20.6333	7.36667	4	Canada	0	Touchette et al	2008	Touchette E, Mongrain V, Petit D, Tremblay RE, Montplaisir JY. Development of sleep-wake schedules during childhood and relationship with sleep duration. Arch Pediatr Adolesc Med. 2008 Apr;162(4):343-9.	1	8
21.16	6.95	21.455	7.525	4	Japan	0	Doi et al	2016	Doi Y, Ishihara K, Uchiyama M. Epidemiological study on chronotype among preschool children in Japan: Prevalence, sleep-wake patterns, and associated factors. Chronobiol Int. 2016;33(10):1340-1350.	1	9
21.8	8.45	22.15	8.98	4.5	Iceland	0	Thorleifsdottir et al	2002	Thorleifsdottir B, Bjornsson JK, Benediktsdottir B, Gislason T, Kristbjarnarson H. Sleep and sleep habits from childhood to young adulthood over a 10-year period. J Psychosom Res 2002;53:529–37.	1	10
21.6	7.1	22	9.2	4.5	India	0	Mishra et al	2017	Mishra A, Pandey RK, Minz A, Arora V. Sleeping habits among school children and their effects on sleep pattern. J Caring Sci. 2017;6(4):315-323.	1	11
19.8833	7.18333	20.45	7.56667	5	Germany	0	Randler et al	2012	Randler C, Fontius I, Vollmer C. Delayed weekend sleep pattern in German infants and children aged 0–6 years. Biol Rhythm Res, 2012;43, 225–234.	1	12
20	6.86667	20.7167	7.48333	5	Canada	0	Touchette et al	2008	Touchette E, Mongrain V, Petit D, Tremblay RE, Montplaisir JY. Development of sleep-wake schedules during childhood and relationship with sleep duration. Arch Pediatr Adolesc Med. 2008 Apr;162(4):343-9.	1	13
20.2568	7.038	21.3585	8.55867	6	Belgium	0	Spruyt et al	2005	Spruyt K, O’Brien LM, Cluydts R, Verleye GB, Ferri R. Odds, prevalence and predictors of sleep problems in school-age normal children. J Sleep Res 2005;14:163–76.	1	14
19.75	6.78333	20.4833	7.41667	6	Germany	0	Randler et al	2012	Randler C, Fontius I, Vollmer C. Delayed weekend sleep pattern in German infants and children aged 0–6 years. Biol Rhythm Res, 2012;43, 225–234.	1	15
19.8333	6.7	20.7333	7.43333	6	Canada	0	Touchette et al	2008	Touchette E, Mongrain V, Petit D, Tremblay RE, Montplaisir JY. Development of sleep-wake schedules during childhood and relationship with sleep duration. Arch Pediatr Adolesc Med. 2008 Apr;162(4):343-9.	1	16
22.2	8.5	22.7	8.01	6.5	Iceland	0	Thorleifsdottir et al	2002	Thorleifsdottir B, Bjornsson JK, Benediktsdottir B, Gislason T, Kristbjarnarson H. Sleep and sleep habits from childhood to young adulthood over a 10-year period. J Psychosom Res 2002;53:529–37.	1	17
20.4333	6.43333	21.1417	6.925	6.5	Canada	2	Gruber et al	2018	Gruber R, Somerville G, Wells S, Keskinel D, Santisteban JA. An actigraphic study of the sleep patterns of younger and older school-age children. Sleep Med. 2018;47:117-125.	1	18
20.2833	7.11667	20.7833	7.85	6.7	Switzerland	0	Werner et al	2009	Werner H, Lebourgeois MK, Geiger A, Jenni OG. Assessment of chronotype in four- to eleven-year-old children: reliability and validity of the Children's Chronotype Questionnaire (CCTQ). Chronobiol Int. 2009 Jul;26(5):992-1014.	1	19
20.3733	7.0545	21.5742	8.69167	7	Belgium	0	Spruyt et al	2005	Spruyt K, O’Brien LM, Cluydts R, Verleye GB, Ferri R. Odds, prevalence and predictors of sleep problems in school-age normal children. J Sleep Res 2005;14:163–76.	1	20
21.8333	7.25	22.8667	10.2667	8	Italy	0	Russo et al	2007	Russo PM, Bruni O, Lucidi F, Ferri R, Violani C. Sleep habits and circadian preference in Italian children and adolescents. J Sleep Res 2007;16:163–9.	1	21
20.4728	7.02117	21.6408	8.67467	8	Belgium	0	Spruyt et al	2005	Spruyt K, O’Brien LM, Cluydts R, Verleye GB, Ferri R. Odds, prevalence and predictors of sleep problems in school-age normal children. J Sleep Res 2005;14:163–76.	1	22
21.9	6.9	22.5	8.9	8	India	0	Mishra et al	2017	Mishra A, Pandey RK, Minz A, Arora V. Sleeping habits among school children and their effects on sleep pattern. J Caring Sci. 2017;6(4):315-323.	1	23
22.5	8.45	23.1	9.2	8.5	Iceland	0	Thorleifsdottir et al	2002	Thorleifsdottir B, Bjornsson JK, Benediktsdottir B, Gislason T, Kristbjarnarson H. Sleep and sleep habits from childhood to young adulthood over a 10-year period. J Psychosom Res 2002;53:529–37.	1	24
20.8333	6.43333	21.6917	7.25	8.5	Canada	2	Gruber et al	2018	Gruber R, Somerville G, Wells S, Keskinel D, Santisteban JA. An actigraphic study of the sleep patterns of younger and older school-age children. Sleep Med. 2018;47:117-125.	1	25
21.9667	7.18333	23	10.2167	9	Italy	0	Russo et al	2007	Russo PM, Bruni O, Lucidi F, Ferri R, Violani C. Sleep habits and circadian preference in Italian children and adolescents. J Sleep Res 2007;16:163–9.	1	26
20.6723	7.05433	21.8573	8.79167	9	Belgium	0	Spruyt et al	2005	Spruyt K, O’Brien LM, Cluydts R, Verleye GB, Ferri R. Odds, prevalence and predictors of sleep problems in school-age normal children. J Sleep Res 2005;14:163–76.	1	27
20.95	5.88333	22.1833	7.96667	9	Qatar	2	Arora et al	2018	Arora T, Gad H, Omar OM, Choudhury S, Chagoury O, Sheikh J, Taheri S. The associations among objectively estimated sleep and obesity indicators in elementary schoolchildren. Sleep Med. 2018;47:25-31.	1	28
21.9833	7.33333	23.0833	9.26667	9	Italy	0	Esposito et al	2014	Esposito M J, Gnisci A, Fabbri M, Cicogna P. Sleep duration in Italian children: Parental control on bedtime as explaining factor. Sleep and Hypnosis 2014;16, 1–9.	1	29
21.9667	7.26667	23.1333	9.33333	9	Italy	0	Esposito et al	2014	Esposito M J, Gnisci A, Fabbri M, Cicogna P. Sleep duration in Italian children: Parental control on bedtime as explaining factor. Sleep and Hypnosis 2014;16, 1–9.	1	30
22.1833	7.26667	23.4333	9.46667	9	Italy	0	Esposito et al	2014	Esposito M J, Gnisci A, Fabbri M, Cicogna P. Sleep duration in Italian children: Parental control on bedtime as explaining factor. Sleep and Hypnosis 2014;16, 1–9.	1	31
21.4667	6.63333	22.05	7.25	9	USA	2	Crowley et al	2014	Crowley SJ, Van Reen E, LeBourgeois MK, Acebo C, Tarokh L, Seifer R, Barker DH, Carskadon MA. A longitudinal assessment of sleep timing, circadian phase, and phase angle of entrainment across human adolescence. PLoS One. 2014 Nov 7;9(11):e112199.	1	32
22.35	7.51667	22.9167	8.98333	9.2	Hong Kong	0	Zhang et al	2010	Zhang J, Li AM, Fok TF, Wing YK. Roles of parental sleep/wake patterns, socioeconomic status, and daytime activities in the sleep/wake patterns of children. J Pediatr. 2010;156(4):606-12	1	33
20.475	6.98333	21.425	7.84167	10	Canada	0	Laberge et al	2001	Laberge L, Petit D, Simard C, Vitaro F, Tremblay RE, Montplaisir J. Development of sleep patterns in early adolescence. J Sleep Res 2001;10:59–67.	1	34
22.15	7.3	23.25	10.1	10	Italy	0	Russo et al	2007	Russo PM, Bruni O, Lucidi F, Ferri R, Violani C. Sleep habits and circadian preference in Italian children and adolescents. J Sleep Res 2007;16:163–9.	1	35
20.7893	7.07117	22.0407	8.892	10	Belgium	0	Spruyt et al	2005	Spruyt K, O’Brien LM, Cluydts R, Verleye GB, Ferri R. Odds, prevalence and predictors of sleep problems in school-age normal children. J Sleep Res 2005;14:163–76.	1	36
21.7333	6.76667	22.4333	7.36667	10	USA	2	Crowley et al	2014	Crowley SJ, Van Reen E, LeBourgeois MK, Acebo C, Tarokh L, Seifer R, Barker DH, Carskadon MA. A longitudinal assessment of sleep timing, circadian phase, and phase angle of entrainment across human adolescence. PLoS One. 2014 Nov 7;9(11):e112199.	1	37
22.6	7.75	23.45	9.4	10.5	Iceland	0	Thorleifsdottir et al	2002	Thorleifsdottir B, Bjornsson JK, Benediktsdottir B, Gislason T, Kristbjarnarson H. Sleep and sleep habits from childhood to young adulthood over a 10-year period. J Psychosom Res 2002;53:529–37.	1	38
21.525	6.55833	22.6167	7.75833	10.5	Canada	2	Gruber et al	2018	Gruber R, Somerville G, Wells S, Keskinel D, Santisteban JA. An actigraphic study of the sleep patterns of younger and older school-age children. Sleep Med. 2018;47:117-125.	1	39
21.5	7.08333	22.3667	8.41667	11	USA	0	Carskadon	1990	Carskadon MA. Patterns of sleep and sleepiness in adolescents. Pediatrician 1990;17(1):5–12.	1	40
21.4	6.7	22.5167	8.88333	11	USA	0	Carskadon	2011	Carskadon MA. Sleep in Adolescents:The Perfect Storm.Pediatr Clin N Am 58 (2011) 637–647.	1	41
20.775	6.98333	21.7583	8.125	11	Canada	0	Laberge et al	2001	Laberge L, Petit D, Simard C, Vitaro F, Tremblay RE, Montplaisir J. Development of sleep patterns in early adolescence. J Sleep Res 2001;10:59–67.	1	42
22.3667	7.08333	23.4833	9.98333	11	Italy	0	Russo et al	2007	Russo PM, Bruni O, Lucidi F, Ferri R, Violani C. Sleep habits and circadian preference in Italian children and adolescents. J Sleep Res 2007;16:163–9.	1	43
20.956	7.03733	22.1907	8.95817	11	Belgium	0	Spruyt et al	2005	Spruyt K, O’Brien LM, Cluydts R, Verleye GB, Ferri R. Odds, prevalence and predictors of sleep problems in school-age normal children. J Sleep Res 2005;14:163–76.	1	44
22.35	6.53333	22.3667	8.41667	16	Australia	0	Warner et al	2008	Warner S, Murray G, Meyer D. Holiday and school-term sleep patterns of Australian adolescents. J Adolesc 2008;31:595–608.	1	45
21.9833	6.65	22.6333	7.51667	11	USA	2	Crowley et al	2014	Crowley SJ, Van Reen E, LeBourgeois MK, Acebo C, Tarokh L, Seifer R, Barker DH, Carskadon MA. A longitudinal assessment of sleep timing, circadian phase, and phase angle of entrainment across human adolescence. PLoS One. 2014 Nov 7;9(11):e112199.	1	46
21.2833	6.76667	22.7833	9.81667	11	France	0	Kubiszewski et al	2014	Kubiszewski V, Fontaine R, Potard C, Gimenes G. Bullying, sleep/wake patterns and subjective sleep disorders: findings from a cross-sectional survey. Chronobiol Int. 2014;31(4):542-53.	1	47
22.7	7.3	23	8.1	11.2	Korea	0	Yang et al	2005	Yang C, Kim JK, Patel SR, Lee J. Age related changes in sleep/wake patterns among Korean teenagers. Pediatrics 2005;115:250–6.	1	48
22.1	6.18333	22.5833	7.38333	11.3	Japan	0	Komada et al	2016	Komada Y, Breugelmans R, Drake CL, Nakajima S, Tamura N, Tanaka H, Inoue S, Inoue Y. Social jetlag affects subjective daytime sleepiness in school-aged children and adolescents: A study using the Japanese version of the Pediatric Daytime Sleepiness Scale (PDSS-J). Chronobiol Int. 2016;33(10):1311-1319.	1	49
21.5	7.08333	22.3667	8.41667	12	USA	0	Carskadon	1990	Carskadon MA. Patterns of sleep and sleepiness in adolescents. Pediatrician 1990;17(1):5–12.	1	50
21.8667	6.58333	23.0833	9.2	12	USA	0	Carskadon	2011	Carskadon MA. Sleep in Adolescents:The Perfect Storm.Pediatr Clin N Am 58 (2011) 637–647.	1	51
21.6167	6.16667	23.1833	8.78333	12	USA	0	Manber et al	1995	Manber R, Pardee RE, Bootzin RR, Kuo T, Rider AM, Rider SP, et al. Changing sleep patterns in adolescents. Sleep Res 1995;24:106.	1	52
21.0167	6.96667	22.1083	8.31667	12	Canada	0	Laberge et al	2001	Laberge L, Petit D, Simard C, Vitaro F, Tremblay RE, Montplaisir J. Development of sleep patterns in early adolescence. J Sleep Res 2001;10:59–67.	1	53
22.5167	7.05	23.6667	9.91667	12	Italy	0	Russo et al	2007	Russo PM, Bruni O, Lucidi F, Ferri R, Violani C. Sleep habits and circadian preference in Italian children and adolescents. J Sleep Res 2007;16:163–9.	1	54
21.1223	6.97067	22.3403	9.07517	12	Belgium	0	Spruyt et al	2005	Spruyt K, O’Brien LM, Cluydts R, Verleye GB, Ferri R. Odds, prevalence and predictors of sleep problems in school-age normal children. J Sleep Res 2005;14:163–76.	1	55
22.5333	6.56667	23.7333	9.16667	12	Taiwan	0	Gau & Merikangas	2004	Gau SS, Merikangas KR. Similarities and differences in sleep-wake patterns among adults and their children. Sleep 2004;27(2):299-304.	1	56
22.1167	6.33333	22.8167	7.46667	12	USA	2	Crowley et al	2014	Crowley SJ, Van Reen E, LeBourgeois MK, Acebo C, Tarokh L, Seifer R, Barker DH, Carskadon MA. A longitudinal assessment of sleep timing, circadian phase, and phase angle of entrainment across human adolescence. PLoS One. 2014 Nov 7;9(11):e112199.	1	57
21.355	6.805	22.89	9.1	12	UK	0	Arora & Taheri	2015	Arora T, Taheri S. Associations among late chronotype, body mass index and dietary behaviors in young adolescents. Int J Obes (Lond) 2015;39(1):39-44.	1	58
23.2167	7.53333	23.8667	8.68333	12.3	USA	2	Hasler et al	2012	Hasler BP, Dahl RE, Holm SM, Jakubcak JL, Ryan ND, Silk JS, Phillips ML, Forbes EE. Weekend-weekday advances in sleep timing are associated with altered reward-related brain function in healthy adolescents. Biol Psychol. 2012;91(3):334-41.	1	59
23.15	7.95	24.5	10.3	12.5	Iceland	0	Thorleifsdottir et al	2002	Thorleifsdottir B, Bjornsson JK, Benediktsdottir B, Gislason T, Kristbjarnarson H. Sleep and sleep habits from childhood to young adulthood over a 10-year period. J Psychosom Res 2002;53:529–37.	1	60
23	6.95	24.05	9.83333	12.5	Hong Kong	0	Chung et al	2008	Chung K, Cheung M. Sleep–wake patterns and sleep disturbance among Hong Kong Chinese adolescents. Sleep 2008;31:185–94.	1	61
22.1	6.83333	23.3333	8.75	13	USA	0	Carskadon	1990	Carskadon MA. Patterns of sleep and sleepiness in adolescents. Pediatrician 1990;17(1):5–12.	1	62
21.8833	6.6	23.4333	9.35	13	USA	0	Carskadon	2011	Carskadon MA. Sleep in Adolescents:The Perfect Storm.Pediatr Clin N Am 58 (2011) 637–647.	1	63
21.4917	6.93333	22.5667	8.75833	13	Canada	0	Laberge et al	2001	Laberge L, Petit D, Simard C, Vitaro F, Tremblay RE, Montplaisir J. Development of sleep patterns in early adolescence. J Sleep Res 2001;10:59–67.	1	64
22.55	7.13333	23.7	10.1333	13	Italy	0	Russo et al	2007	Russo PM, Bruni O, Lucidi F, Ferri R, Violani C. Sleep habits and circadian preference in Italian children and adolescents. J Sleep Res 2007;16:163–9.	1	65
21.1227	7.08717	22.3075	8.976	13	Belgium	0	Spruyt et al	2005	Spruyt K, O’Brien LM, Cluydts R, Verleye GB, Ferri R. Odds, prevalence and predictors of sleep problems in school-age normal children. J Sleep Res 2005;14:163–76.	1	66
21.5583	6.91667	22.9583	9.65	13	Belgium	0	Van den Bulck	2004	Van den Bulck J. Television viewing, computer game playing, and internet use and self-reported time to bed and time out of bed in secondary-school children. Sleep 2004;27:101–4.	1	67
22.1	6.8	21.9	8.7	13	India	0	Mishra et al	2017	Mishra A, Pandey RK, Minz A, Arora V. Sleeping habits among school children and their effects on sleep pattern. J Caring Sci. 2017;6(4):315-323.	1	68
22.5	6.33333	23.3333	7.91667	13	USA	2	Crowley et al	2014	Crowley SJ, Van Reen E, LeBourgeois MK, Acebo C, Tarokh L, Seifer R, Barker DH, Carskadon MA. A longitudinal assessment of sleep timing, circadian phase, and phase angle of entrainment across human adolescence. PLoS One. 2014 Nov 7;9(11):e112199.	1	69
21.85	6.6	22.0667	6.88333	13.1	Brasil	2	Peixoto et al	2009	Peixoto CA, da Silva AG, Carskadon MA, Louzada FM. Adolescents living in homes without electric lighting have earlier sleep times. Behav Sleep Med. 2009;7(2):73-80.	1	70
23.2	7	23.5	8.9	13.3	Korea	0	Yang et al	2005	Yang C, Kim JK, Patel SR, Lee J. Age related changes in sleep/wake patterns among Korean teenagers. Pediatrics 2005;115:250–6.	1	71
21.7667	6.2	23.8	9.71667	13.4	Germany	0	Randler et al	2016	Randler C, Wolfgang L, Matt K, Demirhan E, Horzum MB, Beşoluk Ş. Smartphone addiction proneness in relation to sleep and morningness-eveningness in German adolescents. J Behav Addict. 2016;5(3):465-73.	1	72
22.4333	6.5	23.5833	10	13.4	Brasil	0	Brandalize et al	2011	Brandalize M, Pereira RF, Leite N, Filho GL, Louzada FM. Effect of morning school schedule on sleep and anthropometric variables in adolescents: a follow-up study. Chronobiol Int. 2011 Nov;28(9):779-85.	1	73
22.0833	5.98333	23.9	9.36667	13.5	USA	0	Wolfson & Carskadon	1998	Wolfson AR, Carskadon MA. Sleep schedules and daytime functioning in adolescents. Child Dev 1998;69:875–87.	1	74
22.2167	6.25	22.4667	8.3	13.5	China	0	Liu et al	2008	Liu X, Zhao Z, Jia C, Buysse DJ. Sleep patterns and problems among Chinese adolescents. Pediatrics 2008;121:1165–73.	1	75
22.775	7.005	24.455	10.02	13.8	Italy	0	Russo et al	2007	Russo PM, Bruni O, Lucidi F, Ferri R, Violani C. Sleep habits and circadian preference in Italian children and adolescents. J Sleep Res 2007;16:163–9.	1	76
22.6833	6.21667	23.0833	7.56667	13.9	Japan	0	Komada et al	2016	Komada Y, Breugelmans R, Drake CL, Nakajima S, Tamura N, Tanaka H, Inoue S, Inoue Y. Social jetlag affects subjective daytime sleepiness in school-aged children and adolescents: A study using the Japanese version of the Pediatric Daytime Sleepiness Scale (PDSS-J). Chronobiol Int. 2016;33(10):1311-1319.	1	77
22.25	6.46667	23.8833	9.9	14	USA	0	Carskadon	2011	Carskadon MA. Sleep in Adolescents:The Perfect Storm.Pediatr Clin N Am 58 (2011) 637–647.	1	78
22.1667	5.93333	23.95	9.23333	14	USA	0	Carskadon	1990	Carskadon MA. Patterns of sleep and sleepiness in adolescents. Pediatrician 1990;17(1):5–12.	1	79
22.7167	7.03333	23.95	10.3333	14	Italy	0	Russo et al	2007	Russo PM, Bruni O, Lucidi F, Ferri R, Violani C. Sleep habits and circadian preference in Italian children and adolescents. J Sleep Res 2007;16:163–9.	1	80
23.3833	6.98333	24.4833	10.25	14	Hong Kong	0	Chung et al	2008	Chung K, Cheung M. Sleep–wake patterns and sleep disturbance among Hong Kong Chinese adolescents. Sleep 2008;31:185–94.	1	81
22.1667	7.06667	23.45	8.35	14	Australia	1	Short et al	2013	Short MA, Gradisar M, Lack LC, Wright HR, Dohnt H. The sleep patterns and well-being of Australian adolescents. J Adolesc. 2013 Feb;36(1):103-10.	1	82
22	6.75	23.7667	10.3167	14	France	0	Kubiszewski et al	2014	Kubiszewski V, Fontaine R, Potard C, Gimenes G. Bullying, sleep/wake patterns and subjective sleep disorders: findings from a cross-sectional survey. Chronobiol Int. 2014;31(4):542-53.	1	83
23.3667	6.88333	24.5333	9.63333	14	USA	0	Boergers et al	2014	Boergers J, Gable CJ, Owens JA. Later school start time is associated with improved sleep and daytime functioning in adolescents. J Dev Behav Pediatr. 2014;35(1):11-7.	1	84
20.3333	6.93333	23.7833	9.51667	14.1	Canada	0	Gariépy et al	2017	Gariépy G, Janssen I, Sentenac M, Elgar FJ. School start time and sleep in Canadian adolescents. J Sleep Res. 2017;26(2):195-201.	1	85
23.125	7.34	24.655	10.63	14.1	Spain	0	Collado et al	2012	Collado Mateo MJ, Díaz-Morales JF, Escribano Barreno C, Delgado Prieto P, Randler C. Morningness-eveningness and sleep habits among adolescents: age and gender differences. Psicothema. 2012;24(3):410-5.	1	86
22.85	7.33333	24.3667	10.5	13	Spain	0	Collado et al	2012	Collado Mateo MJ, Díaz-Morales JF, Escribano Barreno C, Delgado Prieto P, Randler C. Morningness-eveningness and sleep habits among adolescents: age and gender differences. Psicothema. 2012;24(3):410-5.	1	86
23.15	7.35	24.5667	10.7167	14	Spain	0	Collado et al	2012	Collado Mateo MJ, Díaz-Morales JF, Escribano Barreno C, Delgado Prieto P, Randler C. Morningness-eveningness and sleep habits among adolescents: age and gender differences. Psicothema. 2012;24(3):410-5.	1	86
23.3333	7.36667	24.8167	10.7833	15	Spain	0	Collado et al	2012	Collado Mateo MJ, Díaz-Morales JF, Escribano Barreno C, Delgado Prieto P, Randler C. Morningness-eveningness and sleep habits among adolescents: age and gender differences. Psicothema. 2012;24(3):410-5.	1	86
23.6167	7.4	25.4167	11.0333	16	Spain	0	Collado et al	2012	Collado Mateo MJ, Díaz-Morales JF, Escribano Barreno C, Delgado Prieto P, Randler C. Morningness-eveningness and sleep habits among adolescents: age and gender differences. Psicothema. 2012;24(3):410-5.	1	86
22.55	7.13333	24.2167	9.23333	12.1	USA	0	Lee et al	1999	Lee KA, McEnany G, Weekes D. Gender differences in sleep patterns for early adolescents. J Adolesc Health. 1999 Jan;24(1):16-20. doi: 10.1016/s1054-139x(98)00074-3.	1	86
23.45	7.8	24.42	10.325	14.1	Mexico	2	Arrona-Palacios	2015	Arrona-Palacios A, García A, Valdez P. Sleep-wake habits and circadian preference in Mexican secondary school. Sleep Med. 2015;16(10):1259-64.	1	87
23.23	7.3	25.06	10.71	14.3	Spain	0	Diaz-Morales et	2007	Díaz-Morales JF, de León MC, Sorroche MG. Validity of the Morningness-Eveningness Scale for Children among Spanish adolescents. Chronobiol Int. 2007;24(3):435-47.	1	88
23.8	7.95	25.55	10.5	14.5	Iceland	0	Thorleifsdottir et al	2002	Thorleifsdottir B, Bjornsson JK, Benediktsdottir B, Gislason T, Kristbjarnarson H. Sleep and sleep habits from childhood to young adulthood over a 10-year period. J Psychosom Res 2002;53:529–37.	1	89
23.3167	6.725	24.2667	10.2	14.5	Hong Kong	0	Li et al	2018	Li SX, Chan NY, Man Yu MW, Lam SP, Zhang J, Yan Chan JW, Li AM, Wing YK. Eveningness chronotype, insomnia symptoms, and emotional and behavioural problems in adolescents. Sleep Med. 2018;47:93-99.	1	90
22.4	6.08333	24.1833	9.4	15	USA	0	Carskadon	2011	Carskadon MA. Sleep in Adolescents:The Perfect Storm.Pediatr Clin N Am 58 (2011) 637–647.	1	91
22.3333	6	24.1	9.66667	15	USA	0	Wolfson & Carskadon	1998	Wolfson AR, Carskadon MA. Sleep schedules and daytime functioning in adolescents. Child Dev 1998;69:875–87.	1	92
22.5333	6.38333	24.05	9.85	15	USA	0	Carskadon	2011	Carskadon MA. Sleep in Adolescents:The Perfect Storm.Pediatr Clin N Am 58 (2011) 637–647.	1	93
22.79	6.92	24.46	9.92	15	Italy	0	Giannotti et al	2002	Giannotti F, Cortesi F, Sebastiani T, Ottaviano S. Circadian preference, sleep and daytime behaviour in adolescence. J Sleep Res. 2002 Sep;11(3):191-9.	1	94
23.4333	7.01667	24.5167	10.3833	15	Hong Kong	0	Chung et al	2008	Chung K, Cheung M. Sleep–wake patterns and sleep disturbance among Hong Kong Chinese adolescents. Sleep 2008;31:185–94.	1	95
24	6.8	23.6	9.5	15	Korea	0	Yang et al	2005	Yang C, Kim JK, Patel SR, Lee J. Age related changes in sleep/wake patterns among Korean teenagers. Pediatrics 2005;115:250–6.	1	96
22.5	7.2	23.62	8.63333	15	Australia	1	Short et al	2013	Short MA, Gradisar M, Lack LC, Wright HR, Dohnt H. The sleep patterns and well-being of Australian adolescents. J Adolesc. 2013 Feb;36(1):103-10.	1	97
22.5667	6.36667	23.3167	7.85	15	USA	2	Crowley et al	2014	Crowley SJ, Van Reen E, LeBourgeois MK, Acebo C, Tarokh L, Seifer R, Barker DH, Carskadon MA. A longitudinal assessment of sleep timing, circadian phase, and phase angle of entrainment across human adolescence. PLoS One. 2014 Nov 7;9(11):e112199.	1	98
23.5	6.96667	24.9	9.9	15	USA	0	Boergers et al	2014	Boergers J, Gable CJ, Owens JA. Later school start time is associated with improved sleep and daytime functioning in adolescents. J Dev Behav Pediatr. 2014;35(1):11-7.	1	99
23.85	6.45	24.2333	9.38333	15.3	Korea	0	Seo et al	2017	Seo JH, Kim JH, Yang KI, Hong SB. Late use of electronic media and its association with sleep, depression, and suicidality among Korean adolescents. Sleep Med. 2017 Jan;29:76-80.	1	100
23.73	7.13	24.94	10.24	15.4	Russia	0	Borisenkov et al	2016	Borisenkov MF, Tserne TA, Panev AS, Petrova N.B., Timonin V.D., Kolomeichuk S.N., Vinogradova I.A., Kovyazina M.S., Khokhlov N.A., Kosova A.L., Kasyanova O.N. Seven-year survey of sleep timing in Russian children and adolescents: chronic 1-h forward transition of social clock is associated with increased social jetlag and winter pattern of mood seasonality. Biol Rhythm Res 2016;48:3-12	1	101
22.5667	6.61667	24.9833	10.75	15.4	Switzerland	0	Perkinson-Gloor et al	2013	Perkinson-Gloor N, Lemola S, Grob A. Sleep duration, positive attitude toward life, and academic achievement: the role of daytime tiredness, behavioral persistence, and school start times. J Adolesc. 2013;36(2):311-8.	1	102
24.1	7.09	25.47	11.11	15.6	Russia	0	Borisenkov et al	2016	Borisenkov MF, Tserne TA, Panev AS, Petrova N.B., Timonin V.D., Kolomeichuk S.N., Vinogradova I.A., Kovyazina M.S., Khokhlov N.A., Kosova A.L., Kasyanova O.N. Seven-year survey of sleep timing in Russian children and adolescents: chronic 1-h forward transition of social clock is associated with increased social jetlag and winter pattern of mood seasonality. Biol Rhythm Res 2016;48:3-12	1	103
22.5167	6.63333	25.1	10.3167	15.6	Germany	0	Preckel et al	2013	Preckel F, Lipnevich AA, Boehme K, Brandner L, Georgi K, Könen T, Mursin K, Roberts RD. Morningness-eveningness and educational outcomes: the lark has an advantage over the owl at high school. Br J Educ Psychol. 2013;83(Pt 1):114-34.	1	104
22.65	6.13333	23.9333	9.25	16	USA	0	Manber et al	1995	Manber R, Pardee RE, Bootzin RR, Kuo T, Rider AM, Rider SP, et al. Changing sleep patterns in adolescents. Sleep Res 1995;24:106.	1	105
22.8667	6.21667	24.4667	9.35	16	USA	0	Carskadon	1990	Carskadon MA. Patterns of sleep and sleepiness in adolescents. Pediatrician 1990;17(1):5–12.	1	106
22.6167	6.08333	24.5	9.76667	16	USA	0	Wolfson & Carskadon	1998	Wolfson AR, Carskadon MA. Sleep schedules and daytime functioning in adolescents. Child Dev 1998;69:875–87.	1	107
22.85	6.38333	24.4167	10.1	16	USA	0	Carskadon	2011	Carskadon MA. Sleep in Adolescents:The Perfect Storm.Pediatr Clin N Am 58 (2011) 637–647.	1	108
22.3567	6.45667	22.8033	9.44333	16	USA	0	Knutson & Lauderdale	2009	Knutson KL, Lauderdale DS. Sociodemographic and behavioral predictors of bed time and wake time among US adolescents aged 15 to 19 years. J Pediatr2009;154:426–30.	1	109
22.5	6.90833	25.9417	10.2167	16	Belgium	0	Van den Bulck	2004	Van den Bulck J. Television viewing, computer game playing, and internet use and self-reported time to bed and time out of bed in secondary-school children. Sleep 2004;27:101–4.	1	110
23.5833	6.96667	24.6667	10.3167	16	Hong Kong	0	Chung et al	2008	Chung K, Cheung M. Sleep–wake patterns and sleep disturbance among Hong Kong Chinese adolescents. Sleep 2008;31:185–94.	1	111
22.7	7.3	23.93	8.53333	16	Australia	1	Short et al	2013	Short MA, Gradisar M, Lack LC, Wright HR, Dohnt H. The sleep patterns and well-being of Australian adolescents. J Adolesc. 2013 Feb;36(1):103-10.	1	112
22.7667	6.33333	24.2833	9.66667	16	USA	0	Wolfson et al	2003	Wolfson AR, Carskadon MA, Acebo C, Seifer R, Fallone G, Labyak SE, Martin JL. Evidence for the validity of a sleep habits survey for adolescents.Sleep. 2003;26(2):213-6.	1	113
22.9	6.38333	24.1333	8.76667	16	USA	1	Wolfson et al	2003	Wolfson AR, Carskadon MA, Acebo C, Seifer R, Fallone G, Labyak SE, Martin JL. Evidence for the validity of a sleep habits survey for adolescents.Sleep. 2003;26(2):213-6.	1	114
22.9833	6.3	24.1833	8.71667	16	USA	2	Wolfson et al	2003	Wolfson AR, Carskadon MA, Acebo C, Seifer R, Fallone G, Labyak SE, Martin JL. Evidence for the validity of a sleep habits survey for adolescents.Sleep. 2003;26(2):213-6.	1	115
22.8833	6.46667	23.7833	8.13333	16	USA	2	Crowley et al	2014	Crowley SJ, Van Reen E, LeBourgeois MK, Acebo C, Tarokh L, Seifer R, Barker DH, Carskadon MA. A longitudinal assessment of sleep timing, circadian phase, and phase angle of entrainment across human adolescence. PLoS One. 2014 Nov 7;9(11):e112199.	1	116
24.6	6.65	25.25	9.73333	16	Korea	0	Kim et al	2011	Kim SJ, Lee YJ, Cho SJ, Cho IH, Lim W, Lim W. Relationship between weekend catch-up sleep and poor performance on attention tasks in Korean adolescents. Arch Pediatr Adolesc Med. 2011 Sep;165(9):806-12.	1	117
23.9	6.41667	23.95	7.9	16	Japan	0	Komada et al	2016	Komada Y, Breugelmans R, Drake CL, Nakajima S, Tamura N, Tanaka H, Inoue S, Inoue Y. Social jetlag affects subjective daytime sleepiness in school-aged children and adolescents: A study using the Japanese version of the Pediatric Daytime Sleepiness Scale (PDSS-J). Chronobiol Int. 2016;33(10):1311-1319.	1	118
24.0167	7.08333	24.5833	9.95	16	USA	0	Boergers et al	2014	Boergers J, Gable CJ, Owens JA. Later school start time is associated with improved sleep and daytime functioning in adolescents. J Dev Behav Pediatr. 2014;35(1):11-7.	1	119
23.2833	7.33333	24.6333	9.61667	16.2	Australia	2	Bei et al	2014	Bei B, Allen NB, Nicholas CL, Dudgeon P, Murray G, Trinder J. Actigraphy-assessed sleep during school and vacation periods: a naturalistic study of restricted and extended sleep opportunitiesin adolescents. J Sleep Res. 2014;23(1):107-17.	1	120
22.2361	6.89583	23.0972	9.04167	16.2	USA	2	Agostini et al	2017	Agostini A, Carskadon MA, Dorrian J, Coussens S, Short MA. An experimental study of adolescent sleep restriction during a simulated school week: changes in phase, sleep staging, performance and sleepiness. J Sleep Res. 2017 Apr;26(2):227-235.	1	121
22.6333	6	22.8	8.76667	16.4	China	0	Liu et al	2008	Liu X, Zhao Z, Jia C, Buysse DJ. Sleep patterns and problems among Chinese adolescents. Pediatrics 2008;121:1165–73.	1	122
22.7333	5.91667	24.6833	9.85	16.5	USA	0	Link & Ancoli-Israel	1995	Link SC, Ancoli-Israel S. Sleep and the teenager. Sleep Res 1995;24a:184.	1	123
24.01	8.08	26.2	10.8	16.5	Iceland	0	Thorleifsdottir et al	2002	Thorleifsdottir B, Bjornsson JK, Benediktsdottir B, Gislason T, Kristbjarnarson H. Sleep and sleep habits from childhood to young adulthood over a 10-year period. J Psychosom Res 2002;53:529–37.	1	124
23.89	7.05	24.85	10.27	16.6	Russia	0	Borisenkov et al	2016	Borisenkov MF, Tserne TA, Panev AS, Petrova N.B., Timonin V.D., Kolomeichuk S.N., Vinogradova I.A., Kovyazina M.S., Khokhlov N.A., Kosova A.L., Kasyanova O.N. Seven-year survey of sleep timing in Russian children and adolescents: chronic 1-h forward transition of social clock is associated with increased social jetlag and winter pattern of mood seasonality. Biol Rhythm Res 2016;48:3-12	1	125
23.0833	6.2	24.35	9.33333	16.8	Brasil	1	Sousa et al	2013	Sousa, I.C., Souza, J.C., Louzada, F.M. et al. Changes in sleep habits and knowledge after an educational sleep program in 12th grade students. Sleep Biol. Rhythms 2013;11: 144.	1	126
22.9667	6.43333	24.65	9.35	17	USA	0	Carskadon	1990	Carskadon MA. Patterns of sleep and sleepiness in adolescents. Pediatrician 1990;17(1):5–12.	1	127
23.0333	6.51667	24.75	9.85	17	USA	0	Carskadon	2011	Carskadon MA. Sleep in Adolescents:The Perfect Storm.Pediatr Clin N Am 58 (2011) 637–647.	1	128
23.0667	6.56667	24.0167	8.13333	17	USA	2	Crowley et al	2014	Crowley SJ, Van Reen E, LeBourgeois MK, Acebo C, Tarokh L, Seifer R, Barker DH, Carskadon MA. A longitudinal assessment of sleep timing, circadian phase, and phase angle of entrainment across human adolescence. PLoS One. 2014 Nov 7;9(11):e112199.	1	129
24.5833	6.63333	25.2333	9.63333	17	Korea	0	Kim et al	2011	Kim SJ, Lee YJ, Cho SJ, Cho IH, Lim W, Lim W. Relationship between weekend catch-up sleep and poor performance on attention tasks in Korean adolescents. Arch Pediatr Adolesc Med. 2011 Sep;165(9):806-12.	1	130
23.0333	6.48333	25.3833	10.8167	17	France	0	Kubiszewski et al	2014	Kubiszewski V, Fontaine R, Potard C, Gimenes G. Bullying, sleep/wake patterns and subjective sleep disorders: findings from a cross-sectional survey. Chronobiol Int. 2014;31(4):542-53.	1	131
24.5833	7.21667	25.1333	9.91667	17	USA	0	Boergers et al	2014	Boergers J, Gable CJ, Owens JA. Later school start time is associated with improved sleep and daytime functioning in adolescents. J Dev Behav Pediatr. 2014;35(1):11-7.	1	132
24.9	6.3	23.9	9.3	17.1	Korea	0	Yang et al	2005	Yang C, Kim JK, Patel SR, Lee J. Age related changes in sleep/wake patterns among Korean teenagers. Pediatrics 2005;115:250–6.	1	133
22.5167	6.25	24.5333	10.1167	17.1	Germany	0	Randler et al	2016	Randler C, Wolfgang L, Matt K, Demirhan E, Horzum MB, Beşoluk Ş. Smartphone addiction proneness in relation to sleep and morningness-eveningness in German adolescents. J Behav Addict. 2016;5(3):465-73.	1	134
22.7667	6.33333	24.2833	9.66667	17.5	USA	0	Wolfson & Carskadon	1998	Wolfson AR, Carskadon MA. Sleep schedules and daytime functioning in adolescents. Child Dev 1998;69:875–87.	1	135
23	6.795	25.42	10.295	17.5	Italy	0	Giannotti et al	2002	Giannotti F, Cortesi F, Sebastiani T, Ottaviano S. Circadian preference, sleep and daytime behaviour in adolescence. J Sleep Res. 2002 Sep;11(3):191-9.	1	136
23.59	7.025	24.835	10.5	17.5	Finland	0	Lehto et al	2016	Lehto JE, Aho O, Eklund M, Heinaro M, Kettunen S, Peltomäki A, Ylä-Kotola K, Öst K, Partonen T. Circadian preferences and sleep in 15- to 20-year old Finnish students. Sleep Sci. 2016;9(2):78-83.	1	137
23.2833	6.78333	25.5167	11.2167	17.8	Norway	0	Sivertsen et al	2013	Sivertsen B, Pallesen S, Stormark KM, Bøe T, Lundervold AJ, Hysing M. Delayed sleep phase syndrome in adolescents: prevalence and correlates in a large population based study. BMC Public Health. 2013;13:1163.	1	138
21.85	6.16667	24.8167	9.53333	18	USA	0	Wolfson & Carskadon	1998	Wolfson AR, Carskadon MA. Sleep schedules and daytime functioning in adolescents. Child Dev 1998;69:875–87.	1	139
23.7833	6.86667	24.7667	10.4333	18	Hong Kong	0	Chung et al	2008	Chung K, Cheung M. Sleep–wake patterns and sleep disturbance among Hong Kong Chinese adolescents. Sleep 2008;31:185–94.	1	140
24.2333	8.06667	24.75	8.6	18	USA	2	Crowley et al	2014	Crowley SJ, Van Reen E, LeBourgeois MK, Acebo C, Tarokh L, Seifer R, Barker DH, Carskadon MA. A longitudinal assessment of sleep timing, circadian phase, and phase angle of entrainment across human adolescence. PLoS One. 2014 Nov 7;9(11):e112199.	1	141
24.8	6.51667	25.3833	9.55	18	Korea	0	Kim et al	2011	Kim SJ, Lee YJ, Cho SJ, Cho IH, Lim W, Lim W. Relationship between weekend catch-up sleep and poor performance on attention tasks in Korean adolescents. Arch Pediatr Adolesc Med. 2011 Sep;165(9):806-12.	1	142
24.3	8.08	26.2	10.6	18.5	Iceland	0	Thorleifsdottir et al	2002	Thorleifsdottir B, Bjornsson JK, Benediktsdottir B, Gislason T, Kristbjarnarson H. Sleep and sleep habits from childhood to young adulthood over a 10-year period. J Psychosom Res 2002;53:529–37.	1	143
24.4167	6.3	25.1833	8.58333	18.8	USA	2	Miller et al	2010	Miller NL, Shattuck LG, Matsangas P. Longitudinal study of sleep patterns of United States Military Academy cadets. Sleep 2010;33(12):1623-1631.	1	144
23.725	7.11	25.3	9.59	19.6	Brasil	2	Korczak et al	2008	Korczak AL, Martynhak BJ, Pedrazzoli M, Brito AF, Louzada FM. Influence of chronotype and social zeitgebers on sleep/wake patterns. Braz J Med Biol Res. 2008;41(10):914-9.	1	145
23.99	7.81	25.495	9.95	19.6	Lebanon	0	Kabrita et al	2014	Kabrita CS, Hajjar-Muça TA, Duffy JF. Predictors of poor sleep quality among Lebanese university students: association between evening typology, lifestyle behaviors, and sleep habits. Nat Sci Sleep. 2014;6:11-8.	1	146
24.2833	8.03333	25.7333	10.1333	20	USA	0	Lund et al	2010	Lund HG, Reider BD, Whiting AB, Prichard JR. Sleep patterns and predictors of disturbed sleep in a large population of college students. J Adolesc Health. 2010;46(2):124-32.	1	147
24	8.06667	25.0167	9.75	20	Netherlands	0	Zavada et al	2005	Zavada A, Gordijn MC, Beersma DG, Daan S, Roenneberg T. Comparison of the Munich Chronotype Questionnaire with the Horne-Ostberg's Morningness-Eveningness Score. Chronobiol Int. 2005;22(2):267-78.	1	148
24.25	8.25	25.7	9.98	20.5	Iceland	0	Thorleifsdottir et al	2002	Thorleifsdottir B, Bjornsson JK, Benediktsdottir B, Gislason T, Kristbjarnarson H. Sleep and sleep habits from childhood to young adulthood over a 10-year period. J Psychosom Res 2002;53:529–37.	1	149
24.1833	7.51667	24.7167	9.81667	20.8	Poland	0	Jankowski et al	2014	Jankowski KS, Vollmer C, Linke M, Randler C. Differences in sun time within the same time zone affect sleep–wake and social rhythms, but not morningness preference: Findings from a Polish–German comparison study. Time & Society 2014;23(2):258-76.	1	150
25.5583	8.55	25.55	9.425	21	Taiwan	1	Tsai & Li	2004	Tsai LL, Li SP. Sleep patterns in college students: gender and grade differences. J Psychosom Res. 2004;56(2):231-7.	1	151
23.84	7.575	25.735	9.625	21.3	Italy	2	Vitale et al	2015	Vitale JA, Roveda E, Montaruli A, Galasso L, Weydahl A, Caumo A, Carandente F. Chronotype influences activity circadian rhythm and sleep: differences in sleep quality between weekdays and weekend. Chronobiol Int. 2015;32(3):405-15.	1	152
23.9	7.86667	24.9	9.88333	21.7	Germany	0	Jankowski et al	2014	Jankowski KS, Vollmer C, Linke M, Randler C. Differences in sun time within the same time zone affect sleep–wake and social rhythms, but not morningness preference: Findings from a Polish–German comparison study. Time & Society 2014;23(2):258-76.	1	153
24.3833	7.78333	24.9167	9.6	21.8	Singapore	0	Lo et al	2014	Lo JC, Leong RL, Loh KK, Dijk DJ, Chee MW. Young Adults' Sleep Duration on Work Days: Differences between East and West. Front Neurol. 2014;5:81.	1	154
24.3167	7.11667	25.3667	9.68333	22	Korea	0	Kim et al	2010	Kim HS, Eom MR, Kim EK. [Sleep patterns and circadian types of nursing students during shift schedules]. J Korean Acad Nurs. 2010;40(1):43-51. [Article in Korean]	1	155
24.6167	6.9	25.8667	10.2	22	Brasil	0	Teixeira et al	2012	Teixeira LR, Pedrazzoli M, Luz AA, Turte SL Paula LP, Valente D, Tufik S, Fisher FM. Assessment of biological components associated with sleepiness in young working college students. Sleep Sci. 2012;5(4):103-106.	1	156
24.2	8.02	25.8	9.98	22.5	Iceland	0	Thorleifsdottir et al	2002	Thorleifsdottir B, Bjornsson JK, Benediktsdottir B, Gislason T, Kristbjarnarson H. Sleep and sleep habits from childhood to young adulthood over a 10-year period. J Psychosom Res 2002;53:529–37.	1	157
23.8833	8.33333	25.15	10.05	22.7	Norway	1	Friborg et al	2012	Friborg O, Bjorvatn B, Amponsah B, Pallesen S. Associations between seasonal variations in day length (photoperiod), sleep timing, sleep quality and mood: a comparison between Ghana (5°) and Norway (69°). J Sleep Res. 2012;21(2):176-84.	1	158
24.455	6.98	25.505	9.7	23	Sudan	0	Mirghani	2017	Mirghani HO. The effect of chronotype (morningness/eveningness) on medical students’ academic achievement in Sudan. Journal of Taibah University Medical Sciences. 2017;12(6):512-516.	1	159
23.75	7.75	24.1278	8.51111	23.4	Norway	1	Friborg et al	2014	Friborg O, Rosenvinge JH, Wynn R, Gradisar M. Sleep timing, chronotype, mood, and behavior at an Arctic latitude (69° N). Sleep Med. 2014;15(7):798-807.	1	160
24.27	7.95	25.75	9.8	24.5	Iceland	0	Thorleifsdottir et al	2002	Thorleifsdottir B, Bjornsson JK, Benediktsdottir B, Gislason T, Kristbjarnarson H. Sleep and sleep habits from childhood to young adulthood over a 10-year period. J Psychosom Res 2002;53:529–37.	1	161
23.85	7.83333	24.9333	9.95	24.9	Finland	2	Björkqvist et al	2014	Björkqvist J, Paavonen J, Andersson S, Pesonen AK, Lahti J, Heinonen K, Eriksson J, Räikkönen K, Hovi P, Kajantie E, Strang-Karlsson S. Advanced sleep-wake rhythm in adults born prematurely: confirmation by actigraphy-based assessment in the Helsinki Study of Very Low Birth Weight Adults. Sleep Med. 2014;15(9):1101-6.	1	162
23.3	7.34167	24.8667	9.51667	25	Germany	0	Randler et al	2014	Randler C, Barrenstein S, Vollmer C, Díaz-Morales JF, Jankowski KS. Women would like their partners to be more synchronized with them in their sleep-wake rhythm. Span J Psychol. 2014;17:E70.	1	163
23.5167	7.93333	24.4667	9.18333	25	UK	0	Lo et al	2014	Lo JC, Leong RL, Loh KK, Dijk DJ, Chee MW. Young Adults' Sleep Duration on Work Days: Differences between East and West. Front Neurol. 2014;5:81.	1	164
22.575	6.46667	22.5333	6.64167	25.4	Gana	1	Friborg et al	2012	Friborg O, Bjorvatn B, Amponsah B, Pallesen S. Associations between seasonal variations in day length (photoperiod), sleep timing, sleep quality and mood: a comparison between Ghana (5°) and Norway (69°). J Sleep Res. 2012;21(2):176-84.	1	165
23.525	7.74167	24.4417	9.25833	25.6	UK	2	Santhi et al	2016	Santhi N, Lazar AS, McCabe PJ, Lo JC, Groeger JA, Dijk DJ. Sex differences in the circadian regulation of sleep and waking cognition in humans. Proc Natl Acad Sci U S A. 2016;113(19):E2730-9.	1	166
23.6	7.925	24.21	8.675	26	USA	0	Rosenthal et al	2001	Rosenthal L, Day R, Gerhardstein R, Meixner R, Roth T, Guido P, Fortier J. Sleepiness/alertness among healthy evening and morning type individuals. Sleep Med. 2001;2(3):243-248.	1	167
24.35	8	25.45	9.95	26.5	Iceland	0	Thorleifsdottir et al	2002	Thorleifsdottir B, Bjornsson JK, Benediktsdottir B, Gislason T, Kristbjarnarson H. Sleep and sleep habits from childhood to young adulthood over a 10-year period. J Psychosom Res 2002;53:529–37.	1	168
23.8	7.63333	24.8	9.21667	27.5	Netherlands	0	Zavada et al	2005	Zavada A, Gordijn MC, Beersma DG, Daan S, Roenneberg T. Comparison of the Munich Chronotype Questionnaire with the Horne-Ostberg's Morningness-Eveningness Score. Chronobiol Int. 2005;22(2):267-78.	1	169
24.2	7.8	25.1	9.2	28.5	Iceland	0	Thorleifsdottir et al	2002	Thorleifsdottir B, Bjornsson JK, Benediktsdottir B, Gislason T, Kristbjarnarson H. Sleep and sleep habits from childhood to young adulthood over a 10-year period. J Psychosom Res 2002;53:529–37.	1	170
23.0667	6.38333	24.2333	8.63333	31.5	USA	0	Soehner et al	2011	Soehner AM, Kennedy KS, Monk TH. Circadian preference and sleep-wake regularity: associations with self-report sleep parameters in daytime-working adults. Chronobiol Int. 2011;28(9):802-9.	1	171
23.05	6.93333	24.0167	8.81667	32.8	Poland	0	Randler et al	2015	Randler C, Díaz-Morales JF, Jankowski KS. Synchrony in chronotype and social jetlag between dogs and humans across Europe. Time & Society 2015	1	172
23.7167	7.56667	24.4833	9.16667	34	Spain	0	Randler et al	2015	Randler C, Díaz-Morales JF, Jankowski KS. Synchrony in chronotype and social jetlag between dogs and humans across Europe. Time & Society 2015	1	173
23.5667	7.1	24.3333	8.48333	35	Netherlands	0	Zavada et al	2005	Zavada A, Gordijn MC, Beersma DG, Daan S, Roenneberg T. Comparison of the Munich Chronotype Questionnaire with the Horne-Ostberg's Morningness-Eveningness Score. Chronobiol Int. 2005;22(2):267-78.	1	174
23.815	7.475	24.34	8.91	36	USA	0	Roepke & Duffy	2010	Roepke SE, Duffy JF. Differential impact of chronotype on weekday and weekend sleep timing and duration. Nat Sci Sleep. 2010;2010(2):213-220.	1	175
23.2	7.025	24.0333	8.99167	36.1	France	0	Taillard et al	1999	Taillard J, Philip P, Bioulac B. Morningness/eveningness and the need for sleep.J Sleep Res. 1999;8(4):291-5.	1	176
23.0667	6.38333	24.2333	8.63333	38.6	Côte d’Ivoire	0	Borchers et al	2015	Borchers C, Ouattara D, Vollmer C, Randler C. Sleep duration and chronotype in adults in Côte d’Ivoire: Influence of gender, religion and age. Journal of Psychology in Africa 2015;25: 350-355.	1	177
23.35	6.81667	23.85	8.45	41	Taiwan	0	Gau & Merikangas	2004	Gau SS, Merikangas KR. Similarities and differences in sleep-wake patterns among adults and their children. Sleep 2004;27(2):299-304.	1	178
23.2	6.58	23.675	8	41.1	New Zealand	2	Paine & Gander	2016	Paine SJ, Gander PH. Differences in circadian phase and weekday/weekend sleep patterns in a sample of middle-aged morning types and eveningtypes. Chronobiol Int. 2016;33(8):1009-17.	1	179
23.4	7.19167	23.725	8.69167	41.2	Hong Kong	0	Zhang et al	2010	Zhang J, Li AM, Fok TF, Wing YK. Roles of parental sleep/wake patterns, socioeconomic status, and daytime activities in the sleep/wake patterns of children. J Pediatr. 2010;156(4):606-12	1	180
22.6	6.68333	23.3167	8.33333	42.6	Germany	0	Randler et al	2015	Randler C, Díaz-Morales JF, Jankowski KS. Synchrony in chronotype and social jetlag between dogs and humans across Europe. Time & Society 2015	1	181
23.15	6.5	24.025	8.50833	43	Norway	0	Ursin et al	2005	Ursin R, Bjorvatn B, Holsten F. Sleep duration, subjective sleep need, and sleep habits of 40- to 45-year-olds in the Hordaland Health Study. Sleep. 2005;28(10):1260-9.	1	182
24.0167	7.13333	24.1833	7.83333	45	Brasil	2	Campanini et al	2017	Campanini MZ, Lopez-Garcia E, Rodríguez-Artalejo F, González AD, Andrade SM, Mesas AE. Agreement between sleep diary and actigraphy in a highly educated Brazilian population. Sleep Med. 2017;35:27-34.	1	183
23.9667	6.6	24.35	7.96667	45	Brasil	1	Campanini et al	2017	Campanini MZ, Lopez-Garcia E, Rodríguez-Artalejo F, González AD, Andrade SM, Mesas AE. Agreement between sleep diary and actigraphy in a highly educated Brazilian population. Sleep Med. 2017;35:27-34.	1	184
23.7667	6.53333	24.2	7.43333	47.9	Japan	2	Hashizaki et al	2015	Hashizaki M, Nakajima H, Kume K. Monitoring of weekly sleep pattern variations at home with a contactless biomotion sensor. Sensors (Basel). 2015;15(8):18950-64.	1	185
23.7	7.06667	24.3167	7.8	50	Netherlands	0	Zavada et al	2005	Zavada A, Gordijn MC, Beersma DG, Daan S, Roenneberg T. Comparison of the Munich Chronotype Questionnaire with the Horne-Ostberg's Morningness-Eveningness Score. Chronobiol Int. 2005;22(2):267-78.	1	186
24.4333	6.86667	24.5333	8.59167	50.8	Hong Kong	0	Chan et al	2014	Chan JW, Lam SP, Li SX, Yu MW, Chan NY, Zhang J, Wing YK. Eveningness and insomnia: independent risk factors of nonremission in major depressive disorder. Sleep. 2014;37(5):911-7.	1	187
23.14	6.49	23.55	7.95	51.3	France	0	Taillard et al	2004	Taillard J, Philip P, Chastang JF, Bioulac B. Validation of Horne and Ostberg morningness-eveningness questionnaire in a middle-aged population of French workers. J Biol Rhythms. 2004;19(1):76-86.	1	188
23.7333	6.60833	24.5	8.2	54.3	Norway	0	Johnsen et al	2013	Johnsen MT, Wynn R, Allebrandt K, Bratlid T. Lack of major seasonal variations in self reported sleep-wake rhythms and chronotypes among middle aged and older people at 69 degrees North: the Tromsø Study. Sleep Med. 2013;14(2):140-8.	1	189
22.7	6.995	23.26	7.73	58.4	Mexico	0	Reutrakul et al	2013	Reutrakul S, Hood MM, Crowley SJ, Morgan MK, Teodori M, Knutson KL, Van Cauter E. Chronotype is independently associated with glycemic control in type 2 diabetes. Diabetes Care. 2013;36(9):2523-9.	1	190
21.265	6.84833	21.575	7.64167	4	Japan	0	Fukuda et al	2019	Fukuda K, Hasegawa T, Kawahashi I, Imada S, Preschool children’s eating and sleeping habits: Late rising and brunch on weekends is related to several physical and mental symptoms, Sleep Med. 2019	1	191
23.5	6.7	25.45	8.75	26.5	Singapore	0	Takahashi et al	2018	Takahashi M, Tahara Y, Tsubosaka M, Fukazawa M, Ozaki M, Iwakami T, Nakaoka T, Shibata S. Chronotype and social jetlag influence human circadian clock gene expression.Sci Rep. 2018 8(1):10152.	1	192
23.75	6.79167	25.25	9.35833	26	USA	0	Sexton-Radex & Harris	1992	Sexton-Radex K, Harris D. Morningness versus eveningness arousal patterns in young adults. Percept Mot Skills. 1992, 74(1):115-9.	1	193
23.8833	7.93333	25.3083	9.7	35	Portugal	0	Miller-Mendes et al	2019	Miller-Mendes M, Gomes AA, Ruivo Marques D, Clemente V, Azevedo MH.BaSIQS - basic scale on insomnia complaints and quality of sleep: reliability, norms, validity, and accuracy studies, based on clinical and community samples. Chronobiol Int. 2019 36(5):644-656.	1	194
22.8583	6.60833	24.7917	10.225	14.5	Croatia	0	Koscec et al	2013	Koscec A, Radosevic-Vidacek B, Bakotic M. Morningness-eveningness and sleep patterns of adolescents attending school in two rotating shifts.Chronobiol Int. 2014; 31(1):52-63.	1	195
23.21	5.69	23.65	7.615	15	India	0	Pande et al	2018	Pande · B, Parveen · N, Parganiha A,· Pati AK. Shortening of sleep length and delayed mid-sleep on free days are the characteristic features of predominantly morning active population of Indian teenagers.Sleep and Circadian Rhythms· 2018, 16(4): 431-440	1	196
23.2333	7.31667	24.6333	9.63333	16	Australia	0	Harbard et al	2016	Harbard E, Allen NB, Trinder J, Bei B. What's Keeping Teenagers Up? Prebedtime Behaviors and Actigraphy-Assessed Sleep Over School and Vacation. J Adolesc Health. 2016 58(4):426-432.	1	197
23.5	7	25	10	17.5	Spain	2	Cabré-Riera et al	2019	Cabré-Riera A, Torrent M, Donaire-Gonzalez D, Vrijheid M, Cardis E, Guxens M. Telecommunication devices use, screen time and sleep in adolescents. Environ Res. 2019 171:341-347.	1	198
23.3243	6.88933	24.7985	10.3102	16.5	Finland	0	Short et al	2019	Short MA, Kuula L, Gradisar M, Pesonen A-K, How Internal and External Cues for Bedtime Affect Sleep and Adaptive Functioning in Adolescents, Sleep Med. 2019,	1	199
21.5583	6.63	22.7792	8.50417	12	UK	0	Mireku et al	2019	Mireku MO, Barker MM, Mutz J, Dumontheil, Thomas MSC, Röösli M, Elliott P, Toledano MB. Night-time screen-based media device use and adolescents' sleep and health-related quality of life. Environ Int. 2019 124:66-78	1	200
19.9667	7.31667	20.0333	7.45	0	Germany	0	Randler et al	2019	Randler C, Vollmer C, Kalb N, Itzek-Greulich H. Breakpoints of time in bed, midpoint of sleep, and social jetlag from infancy to early adulthood. Sleep Med. 2019 57:80-86.	1	201
19.75	7.13333	19.95	7.41667	1	Germany	0	Randler et al	2019	Randler C, Vollmer C, Kalb N, Itzek-Greulich H. Breakpoints of time in bed, midpoint of sleep, and social jetlag from infancy to early adulthood. Sleep Med. 2019 57:80-86.	1	202
19.95	7.1	20.2333	7.56667	2	Germany	0	Randler et al	2019	Randler C, Vollmer C, Kalb N, Itzek-Greulich H. Breakpoints of time in bed, midpoint of sleep, and social jetlag from infancy to early adulthood. Sleep Med. 2019 57:80-86.	1	203
19.7333	7.03333	20.1167	7.51667	3	Germany	0	Randler et al	2019	Randler C, Vollmer C, Kalb N, Itzek-Greulich H. Breakpoints of time in bed, midpoint of sleep, and social jetlag from infancy to early adulthood. Sleep Med. 2019 57:80-86.	1	204
19.8333	7.08333	20.35	7.7	4	Germany	0	Randler et al	2019	Randler C, Vollmer C, Kalb N, Itzek-Greulich H. Breakpoints of time in bed, midpoint of sleep, and social jetlag from infancy to early adulthood. Sleep Med. 2019 57:80-86.	1	205
19.9333	7.08333	20.5167	7.8	5	Germany	0	Randler et al	2019	Randler C, Vollmer C, Kalb N, Itzek-Greulich H. Breakpoints of time in bed, midpoint of sleep, and social jetlag from infancy to early adulthood. Sleep Med. 2019 57:80-86.	1	206
19.9833	6.93333	20.8167	7.86667	6	Germany	0	Randler et al	2019	Randler C, Vollmer C, Kalb N, Itzek-Greulich H. Breakpoints of time in bed, midpoint of sleep, and social jetlag from infancy to early adulthood. Sleep Med. 2019 57:80-86.	1	207
20.2333	6.81667	21.2	8.08333	7	Germany	0	Randler et al	2019	Randler C, Vollmer C, Kalb N, Itzek-Greulich H. Breakpoints of time in bed, midpoint of sleep, and social jetlag from infancy to early adulthood. Sleep Med. 2019 57:80-86.	1	208
20.4333	6.73333	21.5667	8.13333	8	Germany	0	Randler et al	2019	Randler C, Vollmer C, Kalb N, Itzek-Greulich H. Breakpoints of time in bed, midpoint of sleep, and social jetlag from infancy to early adulthood. Sleep Med. 2019 57:80-86.	1	209
20.4667	6.73333	21.9167	8.46667	9	Germany	0	Randler et al	2019	Randler C, Vollmer C, Kalb N, Itzek-Greulich H. Breakpoints of time in bed, midpoint of sleep, and social jetlag from infancy to early adulthood. Sleep Med. 2019 57:80-86.	1	210
20.6167	6.66667	22.3	8.73333	10	Germany	0	Randler et al	2019	Randler C, Vollmer C, Kalb N, Itzek-Greulich H. Breakpoints of time in bed, midpoint of sleep, and social jetlag from infancy to early adulthood. Sleep Med. 2019 57:80-86.	1	211
20.9333	6.46667	22.75	9.03333	11	Germany	0	Randler et al	2019	Randler C, Vollmer C, Kalb N, Itzek-Greulich H. Breakpoints of time in bed, midpoint of sleep, and social jetlag from infancy to early adulthood. Sleep Med. 2019 57:80-86.	1	212
21.35	6.41667	23.15	9.33333	12	Germany	0	Randler et al	2019	Randler C, Vollmer C, Kalb N, Itzek-Greulich H. Breakpoints of time in bed, midpoint of sleep, and social jetlag from infancy to early adulthood. Sleep Med. 2019 57:80-86.	1	213
21.7167	6.38333	23.6667	9.7	13	Germany	0	Randler et al	2019	Randler C, Vollmer C, Kalb N, Itzek-Greulich H. Breakpoints of time in bed, midpoint of sleep, and social jetlag from infancy to early adulthood. Sleep Med. 2019 57:80-86.	1	214
22.1667	6.4	24.15	10.0667	14	Germany	0	Randler et al	2019	Randler C, Vollmer C, Kalb N, Itzek-Greulich H. Breakpoints of time in bed, midpoint of sleep, and social jetlag from infancy to early adulthood. Sleep Med. 2019 57:80-86.	1	215
22.45	6.36667	24.6167	10.3833	15	Germany	0	Randler et al	2019	Randler C, Vollmer C, Kalb N, Itzek-Greulich H. Breakpoints of time in bed, midpoint of sleep, and social jetlag from infancy to early adulthood. Sleep Med. 2019 57:80-86.	1	216
22.6333	6.36667	24.9167	10.4167	16	Germany	0	Randler et al	2019	Randler C, Vollmer C, Kalb N, Itzek-Greulich H. Breakpoints of time in bed, midpoint of sleep, and social jetlag from infancy to early adulthood. Sleep Med. 2019 57:80-86.	1	217
22.7333	6.28333	25.1833	10.4667	17	Germany	0	Randler et al	2019	Randler C, Vollmer C, Kalb N, Itzek-Greulich H. Breakpoints of time in bed, midpoint of sleep, and social jetlag from infancy to early adulthood. Sleep Med. 2019 57:80-86.	1	218
23.1	6.53333	25.4	10.45	18	Germany	0	Randler et al	2019	Randler C, Vollmer C, Kalb N, Itzek-Greulich H. Breakpoints of time in bed, midpoint of sleep, and social jetlag from infancy to early adulthood. Sleep Med. 2019 57:80-86.	1	219
23.25	7.01667	25.2167	10.3	19	Germany	0	Randler et al	2019	Randler C, Vollmer C, Kalb N, Itzek-Greulich H. Breakpoints of time in bed, midpoint of sleep, and social jetlag from infancy to early adulthood. Sleep Med. 2019 57:80-86.	1	220
23.3333	7.46667	25.3	10.2333	20	Germany	0	Randler et al	2019	Randler C, Vollmer C, Kalb N, Itzek-Greulich H. Breakpoints of time in bed, midpoint of sleep, and social jetlag from infancy to early adulthood. Sleep Med. 2019 57:80-86.	1	221
23.4333	7.48333	25.1833	10.1	21	Germany	0	Randler et al	2019	Randler C, Vollmer C, Kalb N, Itzek-Greulich H. Breakpoints of time in bed, midpoint of sleep, and social jetlag from infancy to early adulthood. Sleep Med. 2019 57:80-86.	1	222
23.5	7.51667	25.2833	10.0167	22	Germany	0	Randler et al	2019	Randler C, Vollmer C, Kalb N, Itzek-Greulich H. Breakpoints of time in bed, midpoint of sleep, and social jetlag from infancy to early adulthood. Sleep Med. 2019 57:80-86.	1	223
23.6167	7.61667	25.3333	9.95	23	Germany	0	Randler et al	2019	Randler C, Vollmer C, Kalb N, Itzek-Greulich H. Breakpoints of time in bed, midpoint of sleep, and social jetlag from infancy to early adulthood. Sleep Med. 2019 57:80-86.	1	224
23.6667	7.83333	25.3333	9.9	24	Germany	0	Randler et al	2019	Randler C, Vollmer C, Kalb N, Itzek-Greulich H. Breakpoints of time in bed, midpoint of sleep, and social jetlag from infancy to early adulthood. Sleep Med. 2019 57:80-86.	1	225
23.6167	7.65	25.1833	9.66667	25	Germany	0	Randler et al	2019	Randler C, Vollmer C, Kalb N, Itzek-Greulich H. Breakpoints of time in bed, midpoint of sleep, and social jetlag from infancy to early adulthood. Sleep Med. 2019 57:80-86.	1	226
22.87	6.52	23.66	8.42	14.5	USA	1	Harvey et al	2018	Harvey AG, Hein K, Dolsen MR, Dong L, Rabe-Hesketh S, Gumport NB, Kanady J, Wyatt JK, Hinshaw SP, Silk JS, Smith RL, Thompson MA, Zannone N, Blum DJ. Modifying the Impact of Eveningness Chronotype ("Night-Owls") in Youth: A Randomized Controlled Trial. J Am Acad Child Adolesc Psychiatry. 2018;57(10):742-754.	1	227
23.468	5.99866	23.6688	7.15216	46	Japan	0	Islam et al	2018	Islam Z, Akter S, Kochi T, Hu H, Eguchi M, Yamaguchi M, Kuwahara K, Kabe I, Mizoue T. Association of social jetlag with metabolic syndrome among Japanese working population: the Furukawa Nutrition and HealthStudy. Sleep Med. 2018;51:53-58.	1	228
22.3	6.2	23.2	8.6	13	Singapore	0	Yeo et al	2018	Yeo SC, Jos AM, Erwin C, Lee SM, Lee XK, Lo JC, Chee MWL, Gooley JJ. Associations of sleep duration on school nights with self-rated health, overweight, and depression symptoms in adolescents: problems and possible solutions.Sleep Med. 2018 pii: S1389-9457(18)30410-6	1	229
22.4	6.4	23.4	8.9	14	Singapore	0	Yeo et al	2018	Yeo SC, Jos AM, Erwin C, Lee SM, Lee XK, Lo JC, Chee MWL, Gooley JJ. Associations of sleep duration on school nights with self-rated health, overweight, and depression symptoms in adolescents: problems and possible solutions.Sleep Med. 2018 pii: S1389-9457(18)30410-6	1	230
23.5	6	24.1	9.1	15	Singapore	0	Yeo et al	2018	Yeo SC, Jos AM, Erwin C, Lee SM, Lee XK, Lo JC, Chee MWL, Gooley JJ. Associations of sleep duration on school nights with self-rated health, overweight, and depression symptoms in adolescents: problems and possible solutions.Sleep Med. 2018 pii: S1389-9457(18)30410-6	1	231
23.7	6.1	24.3	9.3	16	Singapore	0	Yeo et al	2018	Yeo SC, Jos AM, Erwin C, Lee SM, Lee XK, Lo JC, Chee MWL, Gooley JJ. Associations of sleep duration on school nights with self-rated health, overweight, and depression symptoms in adolescents: problems and possible solutions.Sleep Med. 2018 pii: S1389-9457(18)30410-6	1	232
23.8	6.4	24.6	9.5	17	Singapore	0	Yeo et al	2018	Yeo SC, Jos AM, Erwin C, Lee SM, Lee XK, Lo JC, Chee MWL, Gooley JJ. Associations of sleep duration on school nights with self-rated health, overweight, and depression symptoms in adolescents: problems and possible solutions.Sleep Med. 2018 pii: S1389-9457(18)30410-6	1	233
24.2	6.6	24.7	9.4	18	Singapore	0	Yeo et al	2018	Yeo SC, Jos AM, Erwin C, Lee SM, Lee XK, Lo JC, Chee MWL, Gooley JJ. Associations of sleep duration on school nights with self-rated health, overweight, and depression symptoms in adolescents: problems and possible solutions.Sleep Med. 2018 pii: S1389-9457(18)30410-6	1	234
24.6417	6.625	24.7333	8.73333	19.5	Japan	0	Kato et al	2018	Kato Y, Urbán R, Saito S, Yoshida K, Kurokawa M, Rigó A. Psychometric properties of a Japanese version of Composite Scale of Morningness. Heliyon. 2019;5(1):e01092.	1	235
23.4917	6.075	23.65	7.08333	52	Japan	0	Kato et al	2018	Kato Y, Urbán R, Saito S, Yoshida K, Kurokawa M, Rigó A. Psychometric properties of a Japanese version of Composite Scale of Morningness. Heliyon. 2019;5(1):e01092.	1	236
23.8167	9.06667	25.6	11.3833	33.5	Poland	0	Waleriańczyk et al	2019	Waleriańczyk W, Pruszczak D, Stolarski M. Testing the role of midpoint sleep and social jetlag in the context of work psychology: an exploratory study. Biol Rhythm Res 2019	1	237
23.7	7.18333	25.05	9.96667	23.5	Netherlands	0	Zerbini et al	2019	Zerbini G, Kantermann T, Merrow M. Strategies to decrease social jetlag: Reducing evening blue light advances sleep and melatonin. Eur J Neurosci. 2018	1	238
23.7833	8	25.2167	9.9	22.7	Netherlands	0	Zerbini et al	2019	Zerbini G, Kantermann T, Merrow M. Strategies to decrease social jetlag: Reducing evening blue light advances sleep and melatonin. Eur J Neurosci. 2018	1	239
21.9	6.2	23.1	9.2	13.5	USA	0	Temkin et al	2018	Temkin DA, Princiotta D, Ryberg R, Lewin DS. Later start, longer sleep: implications of middle school start times. J Sch Health. 2018; 88: 370-378.	1	240
22.7833	6.4	23.15	7.8	46	Netherlands	2	Hulsegge et al	2019	Hulsegge G, Loef B, van Kerkhof LW, Roenneberg T, van der Beek AJ, Proper KI. Shift work, sleep disturbances and social jetlag in healthcare workers.J Sleep Res. 2018 Dec 5:e12802.	1	241
23.3667	6.33333	24.5083	9.73333	15.5	USA	0	Mathew et al	2019	Mathew GM, Hale L, Chang AM. Sex Moderates Relationships Among School Night Sleep Duration, Social Jetlag, and Depressive Symptoms in Adolescents.J Biol Rhythms. 2019;34(2):205-217.	1	242
22.9167	6.5	23.95	7.9	20.5	Australia	1, 2	Sargent et al	2014	Sargent C, Lastella M, Halson SL, Roach GD. The impact of training schedules on the sleep and fatigue of elite athletes. Chronobiol Int. 2014;31(10):1160-8.	1	243
22.6167	6.63333	24.0833	9.53333	13	Netherlands	0	Zerbini et al	2017	Zerbini G, van der Vinne V, Otto LKM, Kantermann T, Krijnen WP, Roenneberg T, Merrow M. Lower school performance in late chronotypes: underlying factors and mechanisms. Sci Rep. 2017;7(1):4385.	1	244
23.7	7.5	23.9	8.1	32	USA	2	Chang et al	2009	Chang AM, Reid KJ, Gourineni R, Zee PC. Sleep timing and circadian phase in delayed sleep phase syndrome. J Biol Rhythms. 2009;24(4):313-21	1	245
21.75	6.83333	23.1667	8.75	11	Israel	2	Roth et al	2019	Roth N, Lev-Wiesel R, Shochat T. "How do you sleep?" sleep in self-figure drawings of young adolescents in residential care facilities-An exploratory study. Sleep Med. 2019 pii: S1389-9457(18)30480-5.	1	246
22.5	6.52	23.25	7.71667	52	USA	0	Mokhlesi et al	2019	Mokhlesi B, Temple KA, Tjaden AH, Edelstein SL, Utzschneider KM, Nadeau KJ, Hannon TS, Sam S, Barengolts E, Manchanda S, Ehrmann DA, Van Cauter E; RISE Consortium. Association of Self-Reported Sleep and Circadian Measures With Glycemia in Adults With Prediabetes or Recently Diagnosed Untreated Type 2 Diabetes.Diabetes Care. 2019 pii: dc190298.	1	247
23.3333	7.7	24.5667	8.78333	14.5	Canada	2	Martin et al	2016	Martin JS, Gaudreault MM, Perron M, Laberge L. Chronotype, Light Exposure, Sleep, and Daytime Functioning in High School Students Attending Morning or Afternoon SchoolShifts: An Actigraphic Study.J Biol Rhythms. 2016;31(2):205-17.	1	248
22.65	6.3	23.85	8.16667	14.5	Canada	2	Martin et al	2016	Martin JS, Gaudreault MM, Perron M, Laberge L. Chronotype, Light Exposure, Sleep, and Daytime Functioning in High School Students Attending Morning or Afternoon SchoolShifts: An Actigraphic Study.J Biol Rhythms. 2016;31(2):205-17.	1	248
22.5	6.5	24.5	10	16	Sweden	0	Garmy & Ward	2018	Garmy P, Ward TM. Sleep Habits and Nighttime Texting Among Adolescents. J Sch Nurs. 2018;34(2):121-127.	1	249
23.1667	7.08333	24.2167	9.01667	25	Netherlands	0	Bijlenga et al	2011	Bijlenga D, van der Heijden KB, Breuk M, van Someren EJ, Lie ME, Boonstra AM, Swaab HJ, Kooij JJ. Associations between sleep characteristics, seasonal depressive symptoms, lifestyle, and ADHD symptoms in adults. J Atten Disord. 2013;17(3):261-75.	1	250
23	6.7	23.6833	7.6	40	Netherlands	0	Bijlenga et al	2011	Bijlenga D, van der Heijden KB, Breuk M, van Someren EJ, Lie ME, Boonstra AM, Swaab HJ, Kooij JJ. Associations between sleep characteristics, seasonal depressive symptoms, lifestyle, and ADHD symptoms in adults. J Atten Disord. 2013;17(3):261-75.	1	251
21.6	6.27667	23.0667	8.85833	13	Germany	1	Thoma et al	2019	Thoma VK, Schulz-Zhecheva Y, Oser C, Fleischhaker C, Biscaldi M, Klein C. Media Use, Sleep Quality, and ADHD Symptoms in a Community Sample and a Sample of ADHD Patients Aged 8 to 18 Years. J Atten Disord. 2018:1087054718802014.	1	252
22.3	7.08333	23.4333	8.26667	13.5	USA	2	Hanish & Han	2018	Hanish AE, Han JC. Delayed Onset of Sleep in Adolescents With PAX6 Haploinsufficiency. Biol Res Nurs. 2018;20(2):237-243.	1	253
21.25	6.53333	23.3333	10.5	15.5	Switzerland	1	Brand et al	2009	Brand S, Beck J, Gerber M, Hatzinger M, Holsboer-Trachsler E. 'Football is good for your sleep': favorable sleep patterns and psychological functioning of adolescent male intense footballplayers compared to controls. J Health Psychol. 2009;14(8):1144-55.	1	254
23.095	6.18833	24.61	10.52	14	Mexico	0	Arrona-Palacios	2017	Arrona-Palacios A.High and low use of electronic media during nighttime before going to sleep: A comparative study between adolescents attending a morning or afternoon school shift. J Adolesc. 2017;61:152-163.	1	255
22.8167	6.08333	24.4167	9.88333	14	Mexico	0	Arrona-Palacios & Dİaz-Morales	2018	Arrona-Palacios A, Díaz-Morales JF. Morningness-eveningness is not associated with academic performance in the afternoon school shift: Preliminary findings. Br J Educ Psychol. 2018;88(3):480-498.	1	256
23.7	7.76667	24.65	9.36667	24	Canada	0	Santisteban et al	2018	Santisteban JA, Brown TG, Gruber R. Association between the Munich Chronotype Questionnaire and Wrist Actigraphy. Sleep Disord. 2018;2018:5646848	1	257
24.95	8.4	25.0833	8.75	24	Canada	2	Santisteban et al	2018	Santisteban JA, Brown TG, Gruber R. Association between the Munich Chronotype Questionnaire and Wrist Actigraphy. Sleep Disord. 2018;2018:5646848	1	258
24.7	7.91667	25.5	9.86667	21	UK	0	Porcheret et al	2018	Porcheret K, Wald L, Fritschi L, Gerkema M, Gordijn M, Merrrow M, Rajaratnam SMW, Rock D, Sletten TL, Warman G, Wulff K, Roenneberg T, Foster RG. Chronotype and environmental light exposure in a student population. Chronobiol Int. 2018;35(10):1365-1374.	1	259
24.3167	8.03333	25.2333	9.88333	21.5	Netherlands	0	Porcheret et al	2018	Porcheret K, Wald L, Fritschi L, Gerkema M, Gordijn M, Merrrow M, Rajaratnam SMW, Rock D, Sletten TL, Warman G, Wulff K, Roenneberg T, Foster RG. Chronotype and environmental light exposure in a student population. Chronobiol Int. 2018;35(10):1365-1374.	1	260
24.0333	7.5	25.15	9.68333	22.5	Germany	0	Porcheret et al	2018	Porcheret K, Wald L, Fritschi L, Gerkema M, Gordijn M, Merrrow M, Rajaratnam SMW, Rock D, Sletten TL, Warman G, Wulff K, Roenneberg T, Foster RG. Chronotype and environmental light exposure in a student population. Chronobiol Int. 2018;35(10):1365-1374.	1	261
23.0333	7.46667	24.7667	9.38333	19	Australia	0	Porcheret et al	2018	Porcheret K, Wald L, Fritschi L, Gerkema M, Gordijn M, Merrrow M, Rajaratnam SMW, Rock D, Sletten TL, Warman G, Wulff K, Roenneberg T, Foster RG. Chronotype and environmental light exposure in a student population. Chronobiol Int. 2018;35(10):1365-1374.	1	262
24.2	7.33333	24.9833	9.75	20.5	Australia	0	Porcheret et al	2018	Porcheret K, Wald L, Fritschi L, Gerkema M, Gordijn M, Merrrow M, Rajaratnam SMW, Rock D, Sletten TL, Warman G, Wulff K, Roenneberg T, Foster RG. Chronotype and environmental light exposure in a student population. Chronobiol Int. 2018;35(10):1365-1374.	1	263
23.0167	7	24.7667	9.16667	20	New Zealand	0	Porcheret et al	2018	Porcheret K, Wald L, Fritschi L, Gerkema M, Gordijn M, Merrrow M, Rajaratnam SMW, Rock D, Sletten TL, Warman G, Wulff K, Roenneberg T, Foster RG. Chronotype and environmental light exposure in a student population. Chronobiol Int. 2018;35(10):1365-1374.	1	264
23.3333	5.70833	23.5833	7.325	45.5	Sweden	2	Lowden et al	2018	Lowden A, Lemos N, Gonçalves B, Öztürk G, Louzada F, Pedrazzoli M, Moreno KL. Delayed Sleep in Winter Related to Natural Daylight Exposure among Arctic Day Workers. Clocks & Sleep 2018;1(1), 105-116	1	265
24.3444	7.65	25.5222	9.58333	23.5	Netherlands	0	Zerbini et al	2019	Zerbini G, Kantermann T, Merrow M. Strategies to decrease social jetlag: Reducing evening blue light advances sleep and melatonin. Eur J Neurosci. 2018. Suppl. Tables	1	266
24.4278	8.06111	25.5722	9.02222	22.7	Netherlands	0	Zerbini et al	2019	Zerbini G, Kantermann T, Merrow M. Strategies to decrease social jetlag: Reducing evening blue light advances sleep and melatonin. Eur J Neurosci. 2018. Suppl. Tables	1	267
21.2583	6.53333	22.8333	8.725	11.5	USA	0	Foley et al	2018	Foley JE, Ram N, Susman EJ, Weinraub M. Changes to sleep-wake behaviors are associated with trajectories of pubertal timing and tempo of secondary sex characteristics. J Adolesc. 2018 Oct;68:171-186.	1	268
24.5333	7.45	25.6083	10.3667	17	Norway	1	Friborg et al	2018	Friborg O, Sundby J, Rognmo K, Rosenvinge JH, Bergvik S. No seasonality in cognitive performance among adolescents at a subarctic latitude (69°N). Applied Cognitive Psychology 32 (2), 217-224	1	269
23.4667	6.98333	24.2167	8.1	24.5	Japan	0	Kayaba et al	2018	Kayaba M, Sasai-Sakuma T, Inoue Y. Clinical significance of social jetlag in patients with excessive daytime sleepiness. Chronobiol Int. 2018;35(12):1637-1646.	1	270
23.2	6.85	23.8	8.88333	20	Slovenija	0	Tomažič & Randler	2019	Tomažič, I., and Randler, C. (2019). Slovenian adaptation of the Morningness-Eveningness-Stability Scales improved (MESSi). Biol. Rhythm Res.	1	271
23.6	7.28333	24.4667	9.28333	35	Brasil	1	Pilz et al	2018	Pilz LK, Keller LK, Lenssen D, Roenneberg T. Time to rethink sleep quality: PSQI scores reflect sleep quality on workdays. Sleep. 2018;41(5).	1	272
23.4833	7.23333	24.4167	9.03333	35	Brasil	0	Pilz et al	2018	Pilz LK, Keller LK, Lenssen D, Roenneberg T. Time to rethink sleep quality: PSQI scores reflect sleep quality on workdays. Sleep. 2018;41(5).	1	273
23.76	6.31	25.1	8.39	15.5	USA	0	Quante et al	2018	Quante M, Khandpur N, Kontos EZ, Bakker JP, Owens JA, Redline S. A Qualitative Assessment of the Acceptability of Smartphone Applications for Improving Sleep Behaviors in Low-Income and Minority Adolescents. Behav Sleep Med. 2018 5:1-13.	1	274
24.45	7.48333	25.15	9.03333	25	Germany	0	Rahafar et al	2018	Rahafar A, Mohamadpour S, Randler C. Napping and morningness-eveningness, Biol Rhythm Res, 2018;49:6, 948-954	1	275
23.7833	6.51667	24.3	8.2	20	Brasil	0	Lima et al	2002	Lima PF, Medeiros ALD, Araujo JF. Sleep-wake pattern of medical students: early versus late class starting time. Braz J Med Biol Res. 2002;35(11):1373-7.	1	276
25.5583	8.55	25.55	9.425	20.5	Taiwan	1	Tsai & Li	2004	Tsai LL, Li SP. Sleep patterns in college students: gender and grade differences. J Psychosom Res. 2004;56(2):231-7.	1	277
20.3167	7.03333	21.0833	7.73333	5.5	New Zealand	0	Stoner et al	2018	Stoner L, Castro N, Signal L, Skidmore P, Faulkner J, Lark S, Williams MA, Muller D, Harrex H. Sleep and Adiposity in Preadolescent Children: The Importance of Social Jetlag. Child Obes. 2018;14(3):158-164.	1	278
23.8833	7.5	24.6333	9.8	27	Korea	0	Suh et al	2018	Suh S, Kim SH, Ryu H, Choi SJ, Joo EY. Validation of the Korean Munich Chronotype Questionnaire. Sleep Breath. 2018;22(3):773-779.	1	279
23.7333	7.35	24.2	8.45	16	USA	2	Tashjian et al	2019	Tashjian SM, Mullins JL, Galván A. Bedtime Autonomy and Cellphone Use Influence Sleep Duration in Adolescents. J Adolesc Health. 2019;64(1):124-130.	1	280
23.7667	7.63333	24.8333	9.3	21	Brasil	2	Umemura et al	2018	Umemura GS, Pinho JP, da Silva Brandão Gonçalves B, Furtado F, Forner-Cordero A. Social jetlag impairs balance control. Sci Rep. 2018;8(1):9406.	1	281
23.4	6.9	24.7833	9.53333	18.5	Switzerland	2	Urner et al	2009	Urner M, Tornic J, Bloch KE. Sleep patterns in high school and university students: a longitudinal study. Chronobiol Int. 2009;26(6):1222-34.	1	282
24.0333	7.76667	25.2667	9.8	23.5	Switzerland	2	Urner et al	2009	Urner M, Tornic J, Bloch KE. Sleep patterns in high school and university students: a longitudinal study. Chronobiol Int. 2009;26(6):1222-34.	1	283
22.5	6.86667	22.9167	7.75833	7	USA	2	Weaver et al	2019	Weaver RG, Beets MW, Perry M, Hunt E, Brazendale K, Decker L, Turner-McGrievy G, Pate R, Youngstedt SD, Saelens BE, Maydeu-Olivares A. Changes in children's sleep and physical activity during a 1-week versus a 3-week break from school: a natural experiment. Sleep. 2019;42(1).	1	284
24.25	7	24.4667	7.36667	35	China	2	Zhang et al	2019	Zhang Z, Cajochen C, Khatami R. Social jetlag and chronotypes in the Chinese population measured with wearable devices. Journal of Medical Internet Research 2019.	1	285
21	6.7	21.6	7.4	6.5	Japan	0	Park et al	2002	Park YM, Matsumoto K, Seo YJ, Kang MJ, Nagashima H. Changes of sleep or waking habits by age and sex in Japanese. Percept Mot Skills. 2002;94(3 Pt 2):1199-213.	1	286
21.4	6.6	21.7	7.4	8.5	Japan	0	Park et al	2002	Park YM, Matsumoto K, Seo YJ, Kang MJ, Nagashima H. Changes of sleep or waking habits by age and sex in Japanese. Percept Mot Skills. 2002;94(3 Pt 2):1199-213.	1	287
21.7	6.8	22.6	7.8	10.5	Japan	0	Park et al	2002	Park YM, Matsumoto K, Seo YJ, Kang MJ, Nagashima H. Changes of sleep or waking habits by age and sex in Japanese. Percept Mot Skills. 2002;94(3 Pt 2):1199-213.	1	288
22.4	6.9	23.5	8.2	12.5	Japan	0	Park et al	2002	Park YM, Matsumoto K, Seo YJ, Kang MJ, Nagashima H. Changes of sleep or waking habits by age and sex in Japanese. Percept Mot Skills. 2002;94(3 Pt 2):1199-213.	1	289
23.7	7	24.6	8.8	14.5	Japan	0	Park et al	2002	Park YM, Matsumoto K, Seo YJ, Kang MJ, Nagashima H. Changes of sleep or waking habits by age and sex in Japanese. Percept Mot Skills. 2002;94(3 Pt 2):1199-213.	1	290
23.9	6.9	25	9	16.5	Japan	0	Park et al	2002	Park YM, Matsumoto K, Seo YJ, Kang MJ, Nagashima H. Changes of sleep or waking habits by age and sex in Japanese. Percept Mot Skills. 2002;94(3 Pt 2):1199-213.	1	291
23.8	6.8	24.9	8.4	18.5	Japan	0	Park et al	2002	Park YM, Matsumoto K, Seo YJ, Kang MJ, Nagashima H. Changes of sleep or waking habits by age and sex in Japanese. Percept Mot Skills. 2002;94(3 Pt 2):1199-213.	1	292
23.9	6.7	24.9	8.2	20.5	Japan	0	Park et al	2002	Park YM, Matsumoto K, Seo YJ, Kang MJ, Nagashima H. Changes of sleep or waking habits by age and sex in Japanese. Percept Mot Skills. 2002;94(3 Pt 2):1199-213.	1	293
24	6.8	25.1	8.3	23	Japan	0	Park et al	2002	Park YM, Matsumoto K, Seo YJ, Kang MJ, Nagashima H. Changes of sleep or waking habits by age and sex in Japanese. Percept Mot Skills. 2002;94(3 Pt 2):1199-213.	1	294
23.7	6.7	24.6	8.1	27	Japan	0	Park et al	2002	Park YM, Matsumoto K, Seo YJ, Kang MJ, Nagashima H. Changes of sleep or waking habits by age and sex in Japanese. Percept Mot Skills. 2002;94(3 Pt 2):1199-213.	1	295
23.7	6.6	24.1	7.8	32	Japan	0	Park et al	2002	Park YM, Matsumoto K, Seo YJ, Kang MJ, Nagashima H. Changes of sleep or waking habits by age and sex in Japanese. Percept Mot Skills. 2002;94(3 Pt 2):1199-213.	1	296
23.7	6.4	24	7.6	37	Japan	0	Park et al	2002	Park YM, Matsumoto K, Seo YJ, Kang MJ, Nagashima H. Changes of sleep or waking habits by age and sex in Japanese. Percept Mot Skills. 2002;94(3 Pt 2):1199-213.	1	297
23.5	6.3	24	7.5	42	Japan	0	Park et al	2002	Park YM, Matsumoto K, Seo YJ, Kang MJ, Nagashima H. Changes of sleep or waking habits by age and sex in Japanese. Percept Mot Skills. 2002;94(3 Pt 2):1199-213.	1	298
23.6	6.3	23.9	7.4	47	Japan	0	Park et al	2002	Park YM, Matsumoto K, Seo YJ, Kang MJ, Nagashima H. Changes of sleep or waking habits by age and sex in Japanese. Percept Mot Skills. 2002;94(3 Pt 2):1199-213.	1	299
23.2	6.2	23.7	7.3	52	Japan	0	Park et al	2002	Park YM, Matsumoto K, Seo YJ, Kang MJ, Nagashima H. Changes of sleep or waking habits by age and sex in Japanese. Percept Mot Skills. 2002;94(3 Pt 2):1199-213.	1	300
22.7	6	23.6	7.1	57	Japan	0	Park et al	2002	Park YM, Matsumoto K, Seo YJ, Kang MJ, Nagashima H. Changes of sleep or waking habits by age and sex in Japanese. Percept Mot Skills. 2002;94(3 Pt 2):1199-213.	1	301
22.5	6.1	23.2	6.9	62	Japan	0	Park et al	2002	Park YM, Matsumoto K, Seo YJ, Kang MJ, Nagashima H. Changes of sleep or waking habits by age and sex in Japanese. Percept Mot Skills. 2002;94(3 Pt 2):1199-213.	1	302
22.2	6.1	22.3	6.6	67	Japan	0	Park et al	2002	Park YM, Matsumoto K, Seo YJ, Kang MJ, Nagashima H. Changes of sleep or waking habits by age and sex in Japanese. Percept Mot Skills. 2002;94(3 Pt 2):1199-213.	1	303
21.9	6.2	22.2	6.7	72	Japan	0	Park et al	2002	Park YM, Matsumoto K, Seo YJ, Kang MJ, Nagashima H. Changes of sleep or waking habits by age and sex in Japanese. Percept Mot Skills. 2002;94(3 Pt 2):1199-213.	1	304
21.8	6.2	22.1	6.4	77	Japan	0	Park et al	2002	Park YM, Matsumoto K, Seo YJ, Kang MJ, Nagashima H. Changes of sleep or waking habits by age and sex in Japanese. Percept Mot Skills. 2002;94(3 Pt 2):1199-213.	1	305
21.5	6.2	21.6	6.6	85	Japan	0	Park et al	2002	Park YM, Matsumoto K, Seo YJ, Kang MJ, Nagashima H. Changes of sleep or waking habits by age and sex in Japanese. Percept Mot Skills. 2002;94(3 Pt 2):1199-213.	1	306
21.7	7.81667	21.1833	8.85	4	Portugal	0	Clara & Gomes	2019	Clara MI, Gomes AA, An epidemiological study of sleep−wake timings in school children from 4 to 11 years old: Insights on the sleep phase shift and implications for the school starting times’ debate, Sleep Medicine, 2019, https://doi.org/10.1016/j.sleep.2019.06.024	1	307
21.75	7.75	22.3167	8.86667	5	Portugal	0	Clara & Gomes	2019	Clara MI, Gomes AA, An epidemiological study of sleep−wake timings in school children from 4 to 11 years old: Insights on the sleep phase shift and implications for the school starting times’ debate, Sleep Medicine, 2019, https://doi.org/10.1016/j.sleep.2019.06.024	1	308
21.9	7.71667	22.4167	8.93333	6	Portugal	0	Clara & Gomes	2019	Clara MI, Gomes AA, An epidemiological study of sleep−wake timings in school children from 4 to 11 years old: Insights on the sleep phase shift and implications for the school starting times’ debate, Sleep Medicine, 2019, https://doi.org/10.1016/j.sleep.2019.06.024	1	309
21.95	7.71667	22.6333	9.05	7	Portugal	0	Clara & Gomes	2019	Clara MI, Gomes AA, An epidemiological study of sleep−wake timings in school children from 4 to 11 years old: Insights on the sleep phase shift and implications for the school starting times’ debate, Sleep Medicine, 2019, https://doi.org/10.1016/j.sleep.2019.06.024	1	310
21.9667	7.65	22.65	9.1	8	Portugal	0	Clara & Gomes	2019	Clara MI, Gomes AA, An epidemiological study of sleep−wake timings in school children from 4 to 11 years old: Insights on the sleep phase shift and implications for the school starting times’ debate, Sleep Medicine, 2019, https://doi.org/10.1016/j.sleep.2019.06.024	1	311
22.0667	7.66667	22.75	9.15	9	Portugal	0	Clara & Gomes	2019	Clara MI, Gomes AA, An epidemiological study of sleep−wake timings in school children from 4 to 11 years old: Insights on the sleep phase shift and implications for the school starting times’ debate, Sleep Medicine, 2019, https://doi.org/10.1016/j.sleep.2019.06.024	1	312
22.1167	7.41667	22.8	9.25	10	Portugal	0	Clara & Gomes	2019	Clara MI, Gomes AA, An epidemiological study of sleep−wake timings in school children from 4 to 11 years old: Insights on the sleep phase shift and implications for the school starting times’ debate, Sleep Medicine, 2019, https://doi.org/10.1016/j.sleep.2019.06.024	1	313
22.2	7.33333	22.9167	9.31667	11	Portugal	0	Clara & Gomes	2019	Clara MI, Gomes AA, An epidemiological study of sleep−wake timings in school children from 4 to 11 years old: Insights on the sleep phase shift and implications for the school starting times’ debate, Sleep Medicine, 2019, https://doi.org/10.1016/j.sleep.2019.06.024	1	314
23.7	7.33	24.09	8.02	61.5	Ireland	0	Kelly et al	2019	Kelly RM, Finn J, Healy U, Gallen D, Sreenan S, McDermott JH, Coogan AN, Greater Social Jetlag Associates with Higher HbA1c in Adults with Type 2 Diabetes: A Cross Sectional Study, Sleep Medicine, 2019, https://doi.org/10.1016/j.sleep.2019.07.023.	1	315
21.65	6.36667	23.3167	9.51667	13.5	Germany	0	Weidenauer et al	2019	Weidenauer C,Täuber L, Huber S, Rimkus K, Randler C. Measuring circadian preference in adolescence with the Morningness-Eveningness Stability Scale improved (MESSi), Biological Rhythm Research, 2019, DOI:10.1080/09291016.2019.1600268	1	316
23.7	7.59167	23.825	8.04167	22.5	USA	0	Appleman et al	2013	Appleman K, Figueiro MG, Rea MS. Controlling light-dark exposure patterns rather than sleep schedules determines circadian phase.Sleep Med. 2013;14(5):456-61.	1	317
22.2	6	22.5	7	56	Brasil	0	Mota et al	2019	Mota MC,Silva CM,Balieiro LCT, Gonca,lves BF,Fahmy WM,Crispim CA. Association between social jetlag food consumption and meal times in patients with obesity-related chronic diseases. PLoS ONE 14(2): e0212126.	1	318
23.3833	7.41667	24.6583	9.375	25.5	Germany	0	Kasaeian et al	2019	Kasaeian A, Weidenauer C, Hautzinger M, Randler C. Reproductive success, relationship orientation and sexual behavior in heterosexuals – influence of sleep and sex. Evolutionary Psychology, 2019	1	319
24.4745	6.879	25.4965	10.774	18.293	Russia	0	Putilov et al	2021	Putilov AA, Sveshnikov DS, Bakaeva ZB, Yakunina EB, Starshinov YP, Torshin VI, Alipov NN, Sergeeva OV, Trutneva EA, Lapkin MM, Lopatskaya ZN, Budkevich RO, Budkevich EV, Puchkova AN, Dorokhov VB. Differences between male and female university students in sleepiness, weekday sleep loss, and weekend sleep duration. J Adolesc. 2021 Mar 2;88:84-96. doi: 10.1016/j.adolescence.2021.02.006.	1	320
24.532	6.952	25.1815	10.1805	21.091	Russia	0	Putilov et al	2021	Putilov AA, Sveshnikov DS, Bakaeva ZB, Yakunina EB, Starshinov YP, Torshin VI, Alipov NN, Sergeeva OV, Trutneva EA, Lapkin MM, Lopatskaya ZN, Budkevich RO, Budkevich EV, Puchkova AN, Dorokhov VB. Differences between male and female university students in sleepiness, weekday sleep loss, and weekend sleep duration. J Adolesc. 2021 Mar 2;88:84-96. doi: 10.1016/j.adolescence.2021.02.006.	1	321
25.028	6.532	25.3245	10.2025	18.796	Russia	0	Putilov et al	2021	Putilov AA, Sveshnikov DS, Bakaeva ZB, Yakunina EB, Starshinov YP, Torshin VI, Alipov NN, Sergeeva OV, Trutneva EA, Lapkin MM, Lopatskaya ZN, Budkevich RO, Budkevich EV, Puchkova AN, Dorokhov VB. Differences between male and female university students in sleepiness, weekday sleep loss, and weekend sleep duration. J Adolesc. 2021 Mar 2;88:84-96. doi: 10.1016/j.adolescence.2021.02.006.	1	322
25.0115	6.5815	25.4805	10.256	20.524	Russia	0	Putilov et al	2021	Putilov AA, Sveshnikov DS, Bakaeva ZB, Yakunina EB, Starshinov YP, Torshin VI, Alipov NN, Sergeeva OV, Trutneva EA, Lapkin MM, Lopatskaya ZN, Budkevich RO, Budkevich EV, Puchkova AN, Dorokhov VB. Differences between male and female university students in sleepiness, weekday sleep loss, and weekend sleep duration. J Adolesc. 2021 Mar 2;88:84-96. doi: 10.1016/j.adolescence.2021.02.006.	1	323
24.239	6.425	25.042	10.304	18.656	Russia	0	Putilov et al	2021	Putilov AA, Sveshnikov DS, Bakaeva ZB, Yakunina EB, Starshinov YP, Torshin VI, Alipov NN, Sergeeva OV, Trutneva EA, Lapkin MM, Lopatskaya ZN, Budkevich RO, Budkevich EV, Puchkova AN, Dorokhov VB. Differences between male and female university students in sleepiness, weekday sleep loss, and weekend sleep duration. J Adolesc. 2021 Mar 2;88:84-96. doi: 10.1016/j.adolescence.2021.02.006.	1	324
24.1605	6.491	24.9765	9.98	20.948	Russia	0	Putilov et al	2021	Putilov AA, Sveshnikov DS, Bakaeva ZB, Yakunina EB, Starshinov YP, Torshin VI, Alipov NN, Sergeeva OV, Trutneva EA, Lapkin MM, Lopatskaya ZN, Budkevich RO, Budkevich EV, Puchkova AN, Dorokhov VB. Differences between male and female university students in sleepiness, weekday sleep loss, and weekend sleep duration. J Adolesc. 2021 Mar 2;88:84-96. doi: 10.1016/j.adolescence.2021.02.006.	1	325
24.605	6.7815	25.8325	10.6125	18.824	Russia	0	Putilov et al	2021	Putilov AA, Sveshnikov DS, Bakaeva ZB, Yakunina EB, Starshinov YP, Torshin VI, Alipov NN, Sergeeva OV, Trutneva EA, Lapkin MM, Lopatskaya ZN, Budkevich RO, Budkevich EV, Puchkova AN, Dorokhov VB. Differences between male and female university students in sleepiness, weekday sleep loss, and weekend sleep duration. J Adolesc. 2021 Mar 2;88:84-96. doi: 10.1016/j.adolescence.2021.02.006.	1	326
24.4445	6.9415	25.517	10.099	21.221	Russia	0	Putilov et al	2021	Putilov AA, Sveshnikov DS, Bakaeva ZB, Yakunina EB, Starshinov YP, Torshin VI, Alipov NN, Sergeeva OV, Trutneva EA, Lapkin MM, Lopatskaya ZN, Budkevich RO, Budkevich EV, Puchkova AN, Dorokhov VB. Differences between male and female university students in sleepiness, weekday sleep loss, and weekend sleep duration. J Adolesc. 2021 Mar 2;88:84-96. doi: 10.1016/j.adolescence.2021.02.006.	1	327
24.4667	7.61667	25.1625	9.77083	22.67	Lithuania	0	Jokubauskas et al	2019	Jokubauskas L, Baltrušaitytė A, Pileičikienė G, Žekonis G. Interrelationships between distinct circadian manifestations of possible bruxism, perceived stress, chronotype and social jetlag in a population of undergraduate students. Chronobiol Int. 2019;36(11):1558‐1569. doi:10.1080/07420528.2019.1660356	1	328
24.375	6.79167	26.65	11.2667	17	Norway	0	Hysing et al	2013	Hysing M, Pallesen S, Stormark KM, Lundervold AJ, Sivertsen B. Sleep patterns and insomnia among adolescents: a population-based study. J Sleep Res.2013 Oct;22(5):549-56. 2013;22(5):549‐556. doi:10.1111/jsr.12055	1	329
23.95	7.9	25.8	10.95	16.2	Brasil	0	Ferrari et al	2019	Ferrari Junior GJ, Barbosa DG, Andrade RD, Pelegrini A, Beltrame TS, Felden ÉPG. SUBJECTIVE SLEEP NEED AND DAYTIME SLEEPINESS IN ADOLESCENTS. Rev Paul Pediatr. 2019;37(2):209‐216. doi:10.1590/1984-0462/;2019;37;2;00014	1	330
21.7	6.815	23.235	9.615	13.38	Flemish Belgium	0	Gariepy et al	2020	Gariepy G, Danna S, Gobiņa I, Rasmussen M, Gaspar de Matos M, Tynjälä J, Janssen I PhD, Kalman M PhD, Villeruša A, Husarova D, Brooks F, Elgar FJ, Klavina-Makrecka S MSc, Šmigelskas K, Gaspar T, Schnohr C. How Are Adolescents Sleeping? Adolescent Sleep Patterns and Sociodemographic Differences in 24 European and North American Countries. J Adolesc Health. 2020 Jun;66(6S):S81-S88. doi: 10.1016/j.j…	1	331
22.125	6.755	24.08	9.835	13.21	French Belgium	0	Gariepy et al	2020	Gariepy G, Danna S, Gobiņa I, et al. How Are Adolescents Sleeping? Adolescent Sleep Patterns and Sociodemographic Differences in 24 European and North American Countries. J Adolesc Health. 2020;66(6S):S81-S88. doi:10.1016/j.jadohealth.2020.03.013	1	332
22.185	6.885	23.59	9.415	13.82	Canada	0	Gariepy et al	2020	Gariepy G, Danna S, Gobiņa I, et al. How Are Adolescents Sleeping? Adolescent Sleep Patterns and Sociodemographic Differences in 24 European and North American Countries. J Adolesc Health. 2020;66(6S):S81-S88. doi:10.1016/j.jadohealth.2020.03.013	1	333
22.24	6.465	23.7	9.355	13.4	Czech Republic	0	Gariepy et al	2020	Gariepy G, Danna S, Gobiņa I, et al. How Are Adolescents Sleeping? Adolescent Sleep Patterns and Sociodemographic Differences in 24 European and North American Countries. J Adolesc Health. 2020;66(6S):S81-S88. doi:10.1016/j.jadohealth.2020.03.013	1	334
22.85	6.765	24.515	10.305	13.77	Estonia	0	Gariepy et al	2020	Gariepy G, Danna S, Gobiņa I, et al. How Are Adolescents Sleeping? Adolescent Sleep Patterns and Sociodemographic Differences in 24 European and North American Countries. J Adolesc Health. 2020;66(6S):S81-S88. doi:10.1016/j.jadohealth.2020.03.013	1	335
22.575	6.985	24.195	9.94	13.79	Finland	0	Gariepy et al	2020	Gariepy G, Danna S, Gobiņa I, et al. How Are Adolescents Sleeping? Adolescent Sleep Patterns and Sociodemographic Differences in 24 European and North American Countries. J Adolesc Health. 2020;66(6S):S81-S88. doi:10.1016/j.jadohealth.2020.03.013	1	336
23.305	7.2	24.83	10.36	13.82	Greece	0	Gariepy et al	2020	Gariepy G, Danna S, Gobiņa I, et al. How Are Adolescents Sleeping? Adolescent Sleep Patterns and Sociodemographic Differences in 24 European and North American Countries. J Adolesc Health. 2020;66(6S):S81-S88. doi:10.1016/j.jadohealth.2020.03.013	1	337
22.035	6.3	23.305	9.19	13.46	Hungary	0	Gariepy et al	2020	Gariepy G, Danna S, Gobiņa I, et al. How Are Adolescents Sleeping? Adolescent Sleep Patterns and Sociodemographic Differences in 24 European and North American Countries. J Adolesc Health. 2020;66(6S):S81-S88. doi:10.1016/j.jadohealth.2020.03.013	1	338
22.765	7.155	24.185	10.085	13.6	Iceland	0	Gariepy et al	2020	Gariepy G, Danna S, Gobiņa I, et al. How Are Adolescents Sleeping? Adolescent Sleep Patterns and Sociodemographic Differences in 24 European and North American Countries. J Adolesc Health. 2020;66(6S):S81-S88. doi:10.1016/j.jadohealth.2020.03.013	1	339
22.985	6.875	24.43	10.35	13.53	Latvia	0	Gariepy et al	2020	Gariepy G, Danna S, Gobiņa I, et al. How Are Adolescents Sleeping? Adolescent Sleep Patterns and Sociodemographic Differences in 24 European and North American Countries. J Adolesc Health. 2020;66(6S):S81-S88. doi:10.1016/j.jadohealth.2020.03.013	1	340
22.31	6.985	24.025	9.95	13.02	Norway	0	Gariepy et al	2020	Gariepy G, Danna S, Gobiņa I, et al. How Are Adolescents Sleeping? Adolescent Sleep Patterns and Sociodemographic Differences in 24 European and North American Countries. J Adolesc Health. 2020;66(6S):S81-S88. doi:10.1016/j.jadohealth.2020.03.013	1	341
22.79	6.585	24.025	9.6	13.59	Poland	0	Gariepy et al	2020	Gariepy G, Danna S, Gobiņa I, et al. How Are Adolescents Sleeping? Adolescent Sleep Patterns and Sociodemographic Differences in 24 European and North American Countries. J Adolesc Health. 2020;66(6S):S81-S88. doi:10.1016/j.jadohealth.2020.03.013	1	342
22.535	6.97	23.725	9.775	13.55	Moldova	0	Gariepy et al	2020	Gariepy G, Danna S, Gobiņa I, et al. How Are Adolescents Sleeping? Adolescent Sleep Patterns and Sociodemographic Differences in 24 European and North American Countries. J Adolesc Health. 2020;66(6S):S81-S88. doi:10.1016/j.jadohealth.2020.03.013	1	343
22.625	7.11	24.34	10.065	13.6	Scotland	0	Gariepy et al	2020	Gariepy G, Danna S, Gobiņa I, et al. How Are Adolescents Sleeping? Adolescent Sleep Patterns and Sociodemographic Differences in 24 European and North American Countries. J Adolesc Health. 2020;66(6S):S81-S88. doi:10.1016/j.jadohealth.2020.03.013	1	344
22.36	6.39	23.9	9.515	13.41	Slovakia	0	Gariepy et al	2020	Gariepy G, Danna S, Gobiņa I, et al. How Are Adolescents Sleeping? Adolescent Sleep Patterns and Sociodemographic Differences in 24 European and North American Countries. J Adolesc Health. 2020;66(6S):S81-S88. doi:10.1016/j.jadohealth.2020.03.013	1	345
22.91	7.385	24.91	10.6	13.58	Spain	0	Gariepy et al	2020	Gariepy G, Danna S, Gobiņa I, et al. How Are Adolescents Sleeping? Adolescent Sleep Patterns and Sociodemographic Differences in 24 European and North American Countries. J Adolesc Health. 2020;66(6S):S81-S88. doi:10.1016/j.jadohealth.2020.03.013	1	346
22.26	6.75	24.475	10.425	13.6	Sweden	0	Gariepy et al	2020	Gariepy G, Danna S, Gobiņa I, et al. How Are Adolescents Sleeping? Adolescent Sleep Patterns and Sociodemographic Differences in 24 European and North American Countries. J Adolesc Health. 2020;66(6S):S81-S88. doi:10.1016/j.jadohealth.2020.03.013	1	347
22.305	6.61	24.255	10	13.5	Switzerland	0	Gariepy et al	2020	Gariepy G, Danna S, Gobiņa I, et al. How Are Adolescents Sleeping? Adolescent Sleep Patterns and Sociodemographic Differences in 24 European and North American Countries. J Adolesc Health. 2020;66(6S):S81-S88. doi:10.1016/j.jadohealth.2020.03.013	1	348
22.585	6.89	23.805	9.72	13.4	Ukraine	0	Gariepy et al	2020	Gariepy G, Danna S, Gobiņa I, et al. How Are Adolescents Sleeping? Adolescent Sleep Patterns and Sociodemographic Differences in 24 European and North American Countries. J Adolesc Health. 2020;66(6S):S81-S88. doi:10.1016/j.jadohealth.2020.03.013	1	349
22.41	6.955	23.975	9.855	13.85	Wales	0	Gariepy et al	2020	Gariepy G, Danna S, Gobiņa I, et al. How Are Adolescents Sleeping? Adolescent Sleep Patterns and Sociodemographic Differences in 24 European and North American Countries. J Adolesc Health. 2020;66(6S):S81-S88. doi:10.1016/j.jadohealth.2020.03.013	1	350
23.23	8.76	24.45	9.96	19.1	Netherlands	0	Druijff-van de Woestijne et al	2021	Druijff-van de Woestijne GB, McConchie H, de Kort YAW, Licitra G, Zhang C, Overeem S, Smolders KCHJ. Behavioural biometrics: Using smartphone keyboard activity as a proxy for rest-activity patterns. J Sleep Res. 2021 Mar 5:e13285. doi: 10.1111/jsr.13285.	1	351
21.4667	6.61667	21.8667	7.41667	9.7	Japan	0	Komada et al.	2021	Komada, Y., Ishibashi, Y., Hagiwara, S., Kobori, M., Shimura, A. A Longitudinal Study of Subjective Daytime Sleepiness Changes in Elementary School Children Following a Temporary School Closure Due to COVID-19. Children 2021, 8, 183.10.3390/children8030183 https://doi.org/	1	352
23.3583	6.76667	24.4417	8.45	29	Netherlands	0	Zerbini et al	2021	Zerbini G, Winnebeck EC, Merrow M. Weekly, seasonal, and chronotype-dependent variation of dim-light melatonin onset. J Pineal Res. 2021 Feb 20:e12723. doi: 10.1111/jpi.12723.	1	353
24.2583	6.7	24.6417	7.6	45	Japan	2	Jonasdottir et al	2021	Jonasdottir SS, Minor K, Lehmann S. Gender differences in nighttime sleep patterns and variability across the adult lifespan: a global-scale wearables study. Sleep. 2021 Feb 12;44(2):zsaa169. doi: 10.1093/sleep/zsaa169.	1	354
23.4583	6.775	24.275	8.23333	39	Germany	2	Jonasdottir et al	2021	Jonasdottir SS, Minor K, Lehmann S. Gender differences in nighttime sleep patterns and variability across the adult lifespan: a global-scale wearables study. Sleep. 2021 Feb 12;44(2):zsaa169. doi: 10.1093/sleep/zsaa169.	1	355
24.1667	7.39167	24.725	8.60833	34	Russia	2	Jonasdottir et al	2021	Jonasdottir SS, Minor K, Lehmann S. Gender differences in nighttime sleep patterns and variability across the adult lifespan: a global-scale wearables study. Sleep. 2021 Feb 12;44(2):zsaa169. doi: 10.1093/sleep/zsaa169.	1	356
24.1667	7.275	24.725	8.025	40	Taiwan	2	Jonasdottir et al	2021	Jonasdottir SS, Minor K, Lehmann S. Gender differences in nighttime sleep patterns and variability across the adult lifespan: a global-scale wearables study. Sleep. 2021 Feb 12;44(2):zsaa169. doi: 10.1093/sleep/zsaa169.	1	357
23.7333	7.125	24.275	8.175	40	UK	2	Jonasdottir et al	2021	Jonasdottir SS, Minor K, Lehmann S. Gender differences in nighttime sleep patterns and variability across the adult lifespan: a global-scale wearables study. Sleep. 2021 Feb 12;44(2):zsaa169. doi: 10.1093/sleep/zsaa169.	1	358
22.9833	6.71667	23.45	7.61667	45.5	Australia	2	Ong et al	2019	Ong JL, Tandi J, Patanaik A, Lo JC, Chee MWL. Large-scale data from wearables reveal regional disparities in sleep patterns that persist across age and sex. Sci Rep. 2019 Mar 4;9(1):3415. doi: 10.1038/s41598-019-40156-x.	1	359
22.9333	6.76667	23.4333	7.76667	45.5	New Zealand	2	Ong et al	2019	Ong JL, Tandi J, Patanaik A, Lo JC, Chee MWL. Large-scale data from wearables reveal regional disparities in sleep patterns that persist across age and sex. Sci Rep. 2019 Mar 4;9(1):3415. doi: 10.1038/s41598-019-40156-x.	1	360
23.9667	7.06667	24.4667	8.08333	45.5	Singapore	2	Ong et al	2019	Ong JL, Tandi J, Patanaik A, Lo JC, Chee MWL. Large-scale data from wearables reveal regional disparities in sleep patterns that persist across age and sex. Sci Rep. 2019 Mar 4;9(1):3415. doi: 10.1038/s41598-019-40156-x.	1	361
24.35	7.55	24.75	8.6	45.5	Hong Kong	2	Ong et al	2019	Ong JL, Tandi J, Patanaik A, Lo JC, Chee MWL. Large-scale data from wearables reveal regional disparities in sleep patterns that persist across age and sex. Sci Rep. 2019 Mar 4;9(1):3415. doi: 10.1038/s41598-019-40156-x.	1	362
23.9667	7.11667	24.35	7.98333	45.5	Korea	2	Ong et al	2019	Ong JL, Tandi J, Patanaik A, Lo JC, Chee MWL. Large-scale data from wearables reveal regional disparities in sleep patterns that persist across age and sex. Sci Rep. 2019 Mar 4;9(1):3415. doi: 10.1038/s41598-019-40156-x.	1	363
23.15	7.45	23.75	8.4	18	Australia	2	Ong et al	2019	Ong JL, Tandi J, Patanaik A, Lo JC, Chee MWL. Large-scale data from wearables reveal regional disparities in sleep patterns that persist across age and sex. Sci Rep. 2019 Mar 4;9(1):3415. doi: 10.1038/s41598-019-40156-x.	1	364
23.4	7.45	24.1	8.45	23	Australia	2	Ong et al	2019	Ong JL, Tandi J, Patanaik A, Lo JC, Chee MWL. Large-scale data from wearables reveal regional disparities in sleep patterns that persist across age and sex. Sci Rep. 2019 Mar 4;9(1):3415. doi: 10.1038/s41598-019-40156-x.	1	365
23.25	6.9	24	8.05	28	Australia	2	Ong et al	2019	Ong JL, Tandi J, Patanaik A, Lo JC, Chee MWL. Large-scale data from wearables reveal regional disparities in sleep patterns that persist across age and sex. Sci Rep. 2019 Mar 4;9(1):3415. doi: 10.1038/s41598-019-40156-x.	1	366
23	6.75	23.75	7.95	33	Australia	2	Ong et al	2019	Ong JL, Tandi J, Patanaik A, Lo JC, Chee MWL. Large-scale data from wearables reveal regional disparities in sleep patterns that persist across age and sex. Sci Rep. 2019 Mar 4;9(1):3415. doi: 10.1038/s41598-019-40156-x.	1	367
22.95	6.55	23.45	7.55	38	Australia	2	Ong et al	2019	Ong JL, Tandi J, Patanaik A, Lo JC, Chee MWL. Large-scale data from wearables reveal regional disparities in sleep patterns that persist across age and sex. Sci Rep. 2019 Mar 4;9(1):3415. doi: 10.1038/s41598-019-40156-x.	1	368
23	6.6	23.5	7.55	43	Australia	2	Ong et al	2019	Ong JL, Tandi J, Patanaik A, Lo JC, Chee MWL. Large-scale data from wearables reveal regional disparities in sleep patterns that persist across age and sex. Sci Rep. 2019 Mar 4;9(1):3415. doi: 10.1038/s41598-019-40156-x.	1	369
23	6.5	23.5	7.5	48	Australia	2	Ong et al	2019	Ong JL, Tandi J, Patanaik A, Lo JC, Chee MWL. Large-scale data from wearables reveal regional disparities in sleep patterns that persist across age and sex. Sci Rep. 2019 Mar 4;9(1):3415. doi: 10.1038/s41598-019-40156-x.	1	370
22.8	6.45	23.15	7.3	53	Australia	2	Ong et al	2019	Ong JL, Tandi J, Patanaik A, Lo JC, Chee MWL. Large-scale data from wearables reveal regional disparities in sleep patterns that persist across age and sex. Sci Rep. 2019 Mar 4;9(1):3415. doi: 10.1038/s41598-019-40156-x.	1	371
22.9	6.45	23.2	7.3	58	Australia	2	Ong et al	2019	Ong JL, Tandi J, Patanaik A, Lo JC, Chee MWL. Large-scale data from wearables reveal regional disparities in sleep patterns that persist across age and sex. Sci Rep. 2019 Mar 4;9(1):3415. doi: 10.1038/s41598-019-40156-x.	1	372
22.9	6.75	23.1	7.25	63	Australia	2	Ong et al	2019	Ong JL, Tandi J, Patanaik A, Lo JC, Chee MWL. Large-scale data from wearables reveal regional disparities in sleep patterns that persist across age and sex. Sci Rep. 2019 Mar 4;9(1):3415. doi: 10.1038/s41598-019-40156-x.	1	373
22.9	6.8	23.05	7.05	68	Australia	2	Ong et al	2019	Ong JL, Tandi J, Patanaik A, Lo JC, Chee MWL. Large-scale data from wearables reveal regional disparities in sleep patterns that persist across age and sex. Sci Rep. 2019 Mar 4;9(1):3415. doi: 10.1038/s41598-019-40156-x.	1	374
22.85	6.75	22.95	6.95	76	Australia	2	Ong et al	2019	Ong JL, Tandi J, Patanaik A, Lo JC, Chee MWL. Large-scale data from wearables reveal regional disparities in sleep patterns that persist across age and sex. Sci Rep. 2019 Mar 4;9(1):3415. doi: 10.1038/s41598-019-40156-x.	1	375
23.1	7.4	24	8.5	18	New Zealand	2	Ong et al	2019	Ong JL, Tandi J, Patanaik A, Lo JC, Chee MWL. Large-scale data from wearables reveal regional disparities in sleep patterns that persist across age and sex. Sci Rep. 2019 Mar 4;9(1):3415. doi: 10.1038/s41598-019-40156-x.	1	376
23.35	7.45	24	8.5	23	New Zealand	2	Ong et al	2019	Ong JL, Tandi J, Patanaik A, Lo JC, Chee MWL. Large-scale data from wearables reveal regional disparities in sleep patterns that persist across age and sex. Sci Rep. 2019 Mar 4;9(1):3415. doi: 10.1038/s41598-019-40156-x.	1	377
23.1	7	23.95	8.15	28	New Zealand	2	Ong et al	2019	Ong JL, Tandi J, Patanaik A, Lo JC, Chee MWL. Large-scale data from wearables reveal regional disparities in sleep patterns that persist across age and sex. Sci Rep. 2019 Mar 4;9(1):3415. doi: 10.1038/s41598-019-40156-x.	1	378
23.5	6.75	23.7	8	33	New Zealand	2	Ong et al	2019	Ong JL, Tandi J, Patanaik A, Lo JC, Chee MWL. Large-scale data from wearables reveal regional disparities in sleep patterns that persist across age and sex. Sci Rep. 2019 Mar 4;9(1):3415. doi: 10.1038/s41598-019-40156-x.	1	379
22.95	6.6	23.45	7.65	38	New Zealand	2	Ong et al	2019	Ong JL, Tandi J, Patanaik A, Lo JC, Chee MWL. Large-scale data from wearables reveal regional disparities in sleep patterns that persist across age and sex. Sci Rep. 2019 Mar 4;9(1):3415. doi: 10.1038/s41598-019-40156-x.	1	380
22.75	6.45	23.25	7.5	43	New Zealand	2	Ong et al	2019	Ong JL, Tandi J, Patanaik A, Lo JC, Chee MWL. Large-scale data from wearables reveal regional disparities in sleep patterns that persist across age and sex. Sci Rep. 2019 Mar 4;9(1):3415. doi: 10.1038/s41598-019-40156-x.	1	381
22.75	6.5	23.25	7.55	48	New Zealand	2	Ong et al	2019	Ong JL, Tandi J, Patanaik A, Lo JC, Chee MWL. Large-scale data from wearables reveal regional disparities in sleep patterns that persist across age and sex. Sci Rep. 2019 Mar 4;9(1):3415. doi: 10.1038/s41598-019-40156-x.	1	382
22.8	6.5	23.3	7.5	53	New Zealand	2	Ong et al	2019	Ong JL, Tandi J, Patanaik A, Lo JC, Chee MWL. Large-scale data from wearables reveal regional disparities in sleep patterns that persist across age and sex. Sci Rep. 2019 Mar 4;9(1):3415. doi: 10.1038/s41598-019-40156-x.	1	383
22.75	6.5	23.2	7.5	58	New Zealand	2	Ong et al	2019	Ong JL, Tandi J, Patanaik A, Lo JC, Chee MWL. Large-scale data from wearables reveal regional disparities in sleep patterns that persist across age and sex. Sci Rep. 2019 Mar 4;9(1):3415. doi: 10.1038/s41598-019-40156-x.	1	384
22.8	6.55	23.1	7.45	63	New Zealand	2	Ong et al	2019	Ong JL, Tandi J, Patanaik A, Lo JC, Chee MWL. Large-scale data from wearables reveal regional disparities in sleep patterns that persist across age and sex. Sci Rep. 2019 Mar 4;9(1):3415. doi: 10.1038/s41598-019-40156-x.	1	385
22.95	6.9	23.15	7.45	68	New Zealand	2	Ong et al	2019	Ong JL, Tandi J, Patanaik A, Lo JC, Chee MWL. Large-scale data from wearables reveal regional disparities in sleep patterns that persist across age and sex. Sci Rep. 2019 Mar 4;9(1):3415. doi: 10.1038/s41598-019-40156-x.	1	386
23	6.95	23.1	7.35	76	New Zealand	2	Ong et al	2019	Ong JL, Tandi J, Patanaik A, Lo JC, Chee MWL. Large-scale data from wearables reveal regional disparities in sleep patterns that persist across age and sex. Sci Rep. 2019 Mar 4;9(1):3415. doi: 10.1038/s41598-019-40156-x.	1	387
23.95	7.4	24.5	8.9	18	Singapore	2	Ong et al	2019	Ong JL, Tandi J, Patanaik A, Lo JC, Chee MWL. Large-scale data from wearables reveal regional disparities in sleep patterns that persist across age and sex. Sci Rep. 2019 Mar 4;9(1):3415. doi: 10.1038/s41598-019-40156-x.	1	388
24.75	8	25.5	9.2	23	Singapore	2	Ong et al	2019	Ong JL, Tandi J, Patanaik A, Lo JC, Chee MWL. Large-scale data from wearables reveal regional disparities in sleep patterns that persist across age and sex. Sci Rep. 2019 Mar 4;9(1):3415. doi: 10.1038/s41598-019-40156-x.	1	389
24.45	7.55	25.25	9	28	Singapore	2	Ong et al	2019	Ong JL, Tandi J, Patanaik A, Lo JC, Chee MWL. Large-scale data from wearables reveal regional disparities in sleep patterns that persist across age and sex. Sci Rep. 2019 Mar 4;9(1):3415. doi: 10.1038/s41598-019-40156-x.	1	390
24.1	7.2	24.75	8.55	33	Singapore	2	Ong et al	2019	Ong JL, Tandi J, Patanaik A, Lo JC, Chee MWL. Large-scale data from wearables reveal regional disparities in sleep patterns that persist across age and sex. Sci Rep. 2019 Mar 4;9(1):3415. doi: 10.1038/s41598-019-40156-x.	1	391
23.95	7	24.55	8.3	38	Singapore	2	Ong et al	2019	Ong JL, Tandi J, Patanaik A, Lo JC, Chee MWL. Large-scale data from wearables reveal regional disparities in sleep patterns that persist across age and sex. Sci Rep. 2019 Mar 4;9(1):3415. doi: 10.1038/s41598-019-40156-x.	1	392
23.9	6.9	24.45	8	43	Singapore	2	Ong et al	2019	Ong JL, Tandi J, Patanaik A, Lo JC, Chee MWL. Large-scale data from wearables reveal regional disparities in sleep patterns that persist across age and sex. Sci Rep. 2019 Mar 4;9(1):3415. doi: 10.1038/s41598-019-40156-x.	1	393
23.85	6.85	24.4	7.95	48	Singapore	2	Ong et al	2019	Ong JL, Tandi J, Patanaik A, Lo JC, Chee MWL. Large-scale data from wearables reveal regional disparities in sleep patterns that persist across age and sex. Sci Rep. 2019 Mar 4;9(1):3415. doi: 10.1038/s41598-019-40156-x.	1	394
23.9	6.9	24.4	7.85	53	Singapore	2	Ong et al	2019	Ong JL, Tandi J, Patanaik A, Lo JC, Chee MWL. Large-scale data from wearables reveal regional disparities in sleep patterns that persist across age and sex. Sci Rep. 2019 Mar 4;9(1):3415. doi: 10.1038/s41598-019-40156-x.	1	395
23.85	6.85	24.1	7.5	58	Singapore	2	Ong et al	2019	Ong JL, Tandi J, Patanaik A, Lo JC, Chee MWL. Large-scale data from wearables reveal regional disparities in sleep patterns that persist across age and sex. Sci Rep. 2019 Mar 4;9(1):3415. doi: 10.1038/s41598-019-40156-x.	1	396
23.9	6.9	24.2	7.45	63	Singapore	2	Ong et al	2019	Ong JL, Tandi J, Patanaik A, Lo JC, Chee MWL. Large-scale data from wearables reveal regional disparities in sleep patterns that persist across age and sex. Sci Rep. 2019 Mar 4;9(1):3415. doi: 10.1038/s41598-019-40156-x.	1	397
23.85	6.85	24	7.2	68	Singapore	2	Ong et al	2019	Ong JL, Tandi J, Patanaik A, Lo JC, Chee MWL. Large-scale data from wearables reveal regional disparities in sleep patterns that persist across age and sex. Sci Rep. 2019 Mar 4;9(1):3415. doi: 10.1038/s41598-019-40156-x.	1	398
23.5	6.9	23.6	7	76	Singapore	2	Ong et al	2019	Ong JL, Tandi J, Patanaik A, Lo JC, Chee MWL. Large-scale data from wearables reveal regional disparities in sleep patterns that persist across age and sex. Sci Rep. 2019 Mar 4;9(1):3415. doi: 10.1038/s41598-019-40156-x.	1	399
24	7.5	24.5	9	18	Hong Kong	2	Ong et al	2019	Ong JL, Tandi J, Patanaik A, Lo JC, Chee MWL. Large-scale data from wearables reveal regional disparities in sleep patterns that persist across age and sex. Sci Rep. 2019 Mar 4;9(1):3415. doi: 10.1038/s41598-019-40156-x.	1	400
25	8.5	25.5	9.55	23	Hong Kong	2	Ong et al	2019	Ong JL, Tandi J, Patanaik A, Lo JC, Chee MWL. Large-scale data from wearables reveal regional disparities in sleep patterns that persist across age and sex. Sci Rep. 2019 Mar 4;9(1):3415. doi: 10.1038/s41598-019-40156-x.	1	401
24.8	8	25.45	9.45	28	Hong Kong	2	Ong et al	2019	Ong JL, Tandi J, Patanaik A, Lo JC, Chee MWL. Large-scale data from wearables reveal regional disparities in sleep patterns that persist across age and sex. Sci Rep. 2019 Mar 4;9(1):3415. doi: 10.1038/s41598-019-40156-x.	1	402
24.5	7.7	25.25	9.25	33	Hong Kong	2	Ong et al	2019	Ong JL, Tandi J, Patanaik A, Lo JC, Chee MWL. Large-scale data from wearables reveal regional disparities in sleep patterns that persist across age and sex. Sci Rep. 2019 Mar 4;9(1):3415. doi: 10.1038/s41598-019-40156-x.	1	403
24.45	7.55	24.95	8.8	38	Hong Kong	2	Ong et al	2019	Ong JL, Tandi J, Patanaik A, Lo JC, Chee MWL. Large-scale data from wearables reveal regional disparities in sleep patterns that persist across age and sex. Sci Rep. 2019 Mar 4;9(1):3415. doi: 10.1038/s41598-019-40156-x.	1	404
24.3	7.4	24.75	8.55	43	Hong Kong	2	Ong et al	2019	Ong JL, Tandi J, Patanaik A, Lo JC, Chee MWL. Large-scale data from wearables reveal regional disparities in sleep patterns that persist across age and sex. Sci Rep. 2019 Mar 4;9(1):3415. doi: 10.1038/s41598-019-40156-x.	1	405
24.3	7.45	24.75	8.5	48	Hong Kong	2	Ong et al	2019	Ong JL, Tandi J, Patanaik A, Lo JC, Chee MWL. Large-scale data from wearables reveal regional disparities in sleep patterns that persist across age and sex. Sci Rep. 2019 Mar 4;9(1):3415. doi: 10.1038/s41598-019-40156-x.	1	406
24.35	7.45	24.7	8.45	53	Hong Kong	2	Ong et al	2019	Ong JL, Tandi J, Patanaik A, Lo JC, Chee MWL. Large-scale data from wearables reveal regional disparities in sleep patterns that persist across age and sex. Sci Rep. 2019 Mar 4;9(1):3415. doi: 10.1038/s41598-019-40156-x.	1	407
24.25	7.4	24.55	8.2	58	Hong Kong	2	Ong et al	2019	Ong JL, Tandi J, Patanaik A, Lo JC, Chee MWL. Large-scale data from wearables reveal regional disparities in sleep patterns that persist across age and sex. Sci Rep. 2019 Mar 4;9(1):3415. doi: 10.1038/s41598-019-40156-x.	1	408
24.2	7.5	24.45	8	63	Hong Kong	2	Ong et al	2019	Ong JL, Tandi J, Patanaik A, Lo JC, Chee MWL. Large-scale data from wearables reveal regional disparities in sleep patterns that persist across age and sex. Sci Rep. 2019 Mar 4;9(1):3415. doi: 10.1038/s41598-019-40156-x.	1	409
24	7.4	24.1	7.7	68	Hong Kong	2	Ong et al	2019	Ong JL, Tandi J, Patanaik A, Lo JC, Chee MWL. Large-scale data from wearables reveal regional disparities in sleep patterns that persist across age and sex. Sci Rep. 2019 Mar 4;9(1):3415. doi: 10.1038/s41598-019-40156-x.	1	410
24.1	7.45	24.2	7.75	76	Hong Kong	2	Ong et al	2019	Ong JL, Tandi J, Patanaik A, Lo JC, Chee MWL. Large-scale data from wearables reveal regional disparities in sleep patterns that persist across age and sex. Sci Rep. 2019 Mar 4;9(1):3415. doi: 10.1038/s41598-019-40156-x.	1	411
24.6	7.75	25	9	18	Korea	2	Ong et al	2019	Ong JL, Tandi J, Patanaik A, Lo JC, Chee MWL. Large-scale data from wearables reveal regional disparities in sleep patterns that persist across age and sex. Sci Rep. 2019 Mar 4;9(1):3415. doi: 10.1038/s41598-019-40156-x.	1	412
25	8.5	25.65	9.55	23	Korea	2	Ong et al	2019	Ong JL, Tandi J, Patanaik A, Lo JC, Chee MWL. Large-scale data from wearables reveal regional disparities in sleep patterns that persist across age and sex. Sci Rep. 2019 Mar 4;9(1):3415. doi: 10.1038/s41598-019-40156-x.	1	413
24.6	7.9	25.3	9.05	28	Korea	2	Ong et al	2019	Ong JL, Tandi J, Patanaik A, Lo JC, Chee MWL. Large-scale data from wearables reveal regional disparities in sleep patterns that persist across age and sex. Sci Rep. 2019 Mar 4;9(1):3415. doi: 10.1038/s41598-019-40156-x.	1	414
24.3	7.5	25	8.75	33	Korea	2	Ong et al	2019	Ong JL, Tandi J, Patanaik A, Lo JC, Chee MWL. Large-scale data from wearables reveal regional disparities in sleep patterns that persist across age and sex. Sci Rep. 2019 Mar 4;9(1):3415. doi: 10.1038/s41598-019-40156-x.	1	415
24.1	7.2	24.6	8.45	38	Korea	2	Ong et al	2019	Ong JL, Tandi J, Patanaik A, Lo JC, Chee MWL. Large-scale data from wearables reveal regional disparities in sleep patterns that persist across age and sex. Sci Rep. 2019 Mar 4;9(1):3415. doi: 10.1038/s41598-019-40156-x.	1	416
24	7	24.5	8.05	43	Korea	2	Ong et al	2019	Ong JL, Tandi J, Patanaik A, Lo JC, Chee MWL. Large-scale data from wearables reveal regional disparities in sleep patterns that persist across age and sex. Sci Rep. 2019 Mar 4;9(1):3415. doi: 10.1038/s41598-019-40156-x.	1	417
23.95	6.95	24.4	7.9	48	Korea	2	Ong et al	2019	Ong JL, Tandi J, Patanaik A, Lo JC, Chee MWL. Large-scale data from wearables reveal regional disparities in sleep patterns that persist across age and sex. Sci Rep. 2019 Mar 4;9(1):3415. doi: 10.1038/s41598-019-40156-x.	1	418
23.85	6.9	24.05	7.5	53	Korea	2	Ong et al	2019	Ong JL, Tandi J, Patanaik A, Lo JC, Chee MWL. Large-scale data from wearables reveal regional disparities in sleep patterns that persist across age and sex. Sci Rep. 2019 Mar 4;9(1):3415. doi: 10.1038/s41598-019-40156-x.	1	419
23.6	6.75	23.9	7.35	58	Korea	2	Ong et al	2019	Ong JL, Tandi J, Patanaik A, Lo JC, Chee MWL. Large-scale data from wearables reveal regional disparities in sleep patterns that persist across age and sex. Sci Rep. 2019 Mar 4;9(1):3415. doi: 10.1038/s41598-019-40156-x.	1	420
23.4	6.55	23.55	6.95	63	Korea	2	Ong et al	2019	Ong JL, Tandi J, Patanaik A, Lo JC, Chee MWL. Large-scale data from wearables reveal regional disparities in sleep patterns that persist across age and sex. Sci Rep. 2019 Mar 4;9(1):3415. doi: 10.1038/s41598-019-40156-x.	1	421
23	6.45	23	6.5	68	Korea	2	Ong et al	2019	Ong JL, Tandi J, Patanaik A, Lo JC, Chee MWL. Large-scale data from wearables reveal regional disparities in sleep patterns that persist across age and sex. Sci Rep. 2019 Mar 4;9(1):3415. doi: 10.1038/s41598-019-40156-x.	1	422
23.1	6.4	23.1	6.5	76	Korea	2	Ong et al	2019	Ong JL, Tandi J, Patanaik A, Lo JC, Chee MWL. Large-scale data from wearables reveal regional disparities in sleep patterns that persist across age and sex. Sci Rep. 2019 Mar 4;9(1):3415. doi: 10.1038/s41598-019-40156-x.	1	423
22.8	6.66667	24.1	9.4	13.5	Italy	0	Nosetti et al	2021	Nosetti L, Lonati I, Marelli S, Salsone M, Sforza M, Castelnuovo A, Mombelli S, Masso G, Ferini-Strambi L, Agosti M, Castronovo V. Impact of pre-sleep habits on adolescent sleep: An Italian population-based study. Sleep Medicine, 2021	1	424
23	6.66667	24.3	9.9	15	Italy	0	Nosetti et al	2021	Nosetti L, Lonati I, Marelli S, Salsone M, Sforza M, Castelnuovo A, Mombelli S, Masso G, Ferini-Strambi L, Agosti M, Castronovo V. Impact of pre-sleep habits on adolescent sleep: An Italian population-based study. Sleep Medicine, 2021	1	425
23.1	6.66667	24.7	10	16	Italy	0	Nosetti et al	2021	Nosetti L, Lonati I, Marelli S, Salsone M, Sforza M, Castelnuovo A, Mombelli S, Masso G, Ferini-Strambi L, Agosti M, Castronovo V. Impact of pre-sleep habits on adolescent sleep: An Italian population-based study. Sleep Medicine, 2021	1	426
23.2	6.66667	25	10	17	Italy	0	Nosetti et al	2021	Nosetti L, Lonati I, Marelli S, Salsone M, Sforza M, Castelnuovo A, Mombelli S, Masso G, Ferini-Strambi L, Agosti M, Castronovo V. Impact of pre-sleep habits on adolescent sleep: An Italian population-based study. Sleep Medicine, 2021	1	427
23.4	6.66667	25.5	10.1	18.5	Italy	0	Nosetti et al	2021	Nosetti L, Lonati I, Marelli S, Salsone M, Sforza M, Castelnuovo A, Mombelli S, Masso G, Ferini-Strambi L, Agosti M, Castronovo V. Impact of pre-sleep habits on adolescent sleep: An Italian population-based study. Sleep Medicine, 2021	1	428
22.487	6.78704	23.7444	8.57963	49.6	Finland	0	Suikki et al	2021	Suikki T, Maukonen M, Partonen T, Jousilahti P, Kanerva N, Männistö S. Association between social jet lag, quality of diet and obesity by diurnal preference in Finnish adult population. Chronobiol Int. 2021 Feb 8:1-12. doi: 10.1080/07420528.2021.1876721.	1	429
23.0333	6.5	23.9167	8.51667	37.6056	Austria	0	Florea et al	2021	Florea C, Topalidis P, Hauser T, Angerer M, Kurapov A, Beltran Leon CA, Soares Brandão D, Schabus M. Sleep during COVID-19 lockdown: A cross-cultural study investigating job system relevance. Biochem Pharmacol. 2021 Feb 10:114463. doi: 10.1016/j.bcp.2021.114463.	1	430
24.0167	7.01667	24.9833	9.06667	36.5385	Ukraine	0	Florea et al	2021	Florea C, Topalidis P, Hauser T, Angerer M, Kurapov A, Beltran Leon CA, Soares Brandão D, Schabus M. Sleep during COVID-19 lockdown: A cross-cultural study investigating job system relevance. Biochem Pharmacol. 2021 Feb 10:114463. doi: 10.1016/j.bcp.2021.114463.	1	431
23.5833	7.38333	24.05	8.7	41.4516	Greece	0	Florea et al	2021	Florea C, Topalidis P, Hauser T, Angerer M, Kurapov A, Beltran Leon CA, Soares Brandão D, Schabus M. Sleep during COVID-19 lockdown: A cross-cultural study investigating job system relevance. Biochem Pharmacol. 2021 Feb 10:114463. doi: 10.1016/j.bcp.2021.114463.	1	432
22.9333	6.5	23.9667	8.61667	43.3684	Cuba	0	Florea et al	2021	Florea C, Topalidis P, Hauser T, Angerer M, Kurapov A, Beltran Leon CA, Soares Brandão D, Schabus M. Sleep during COVID-19 lockdown: A cross-cultural study investigating job system relevance. Biochem Pharmacol. 2021 Feb 10:114463. doi: 10.1016/j.bcp.2021.114463.	1	433
23.2833	6.58333	24.0333	8.36667	37.6562	Brasil	0	Florea et al	2021	Florea C, Topalidis P, Hauser T, Angerer M, Kurapov A, Beltran Leon CA, Soares Brandão D, Schabus M. Sleep during COVID-19 lockdown: A cross-cultural study investigating job system relevance. Biochem Pharmacol. 2021 Feb 10:114463. doi: 10.1016/j.bcp.2021.114463.	1	434
21.7833	7.56667	22.5667	8.65	7.5	Portugal	0	Gomes et al	2014	Gomes AA, Parchão C, Almeida A, Clemente V, Pinto de Azevedo MH. Sleep-wake patterns reported by parents in hyperactive children diagnosed according to ICD-10, as compared to paired controls. Child Psychiatry Hum Dev. 2014 Oct;45(5):533-43. doi: 10.1007/s10578-013-0422-6.	1	435
23.25	6.21667	23.6667	7.71667	36.4	Brasil	2	Ruiz et al	2020	Ruiz FS, Beijamini F, Beale AD, Gonçalves BDSB, Vartanian D, Taporoski TP, Middleton B, Krieger JE, Vallada H, Arendt J, Pereira AC, Knutson KL, Pedrazzoli M, von Schantz M. Early chronotype with advanced activity rhythms and dim light melatonin onset in a rural population. J Pineal Res. 2020 Oct;69(3):e12675. doi: 10.1111/jpi.12675.	1	436
22.6667	6.81667	23.8167	8.86667	15.5	Brasil	2	Galina et al	2021	Galina SD, Souza JC, Valdez P, Azevedo CV. Daily light exposure, sleep-wake cycle and attention in adolescents from different urban contexts. Sleep Medicine, 2021 https://doi.org/10.1016/j.sleep.2021.03.012	1	437
23.0333	6.65	23.9333	9.25	15.5	Brasil	2	Galina et al	2021	Galina SD, Souza JC, Valdez P, Azevedo CV. Daily light exposure, sleep-wake cycle and attention in adolescents from different urban contexts. Sleep Medicine, 2021 https://doi.org/10.1016/j.sleep.2021.03.012	1	438
23.3167	7.13333	24.5167	9.26667	28.6	Germany	0	Staller & Randler	2020	Staller N, Randler C. Changes in sleep schedule and chronotype due to COVID-19 restrictions and home office. Somnologie (Berl). 2020 Nov 17:1-7. doi: 10.1007/s11818-020-00277-2.	1	439
24.0333	6.48333	26.1	11	16.6	Uruguay	0	Estevan et al	2020	Estevan I, Silva A, Vetter C, Tassino B. Short Sleep Duration and Extremely Delayed Chronotypes in Uruguayan Youth: The Role of School Start Times and Social Constraints. J Biol Rhythms. 2020 Aug;35(4):391-404. doi: 10.1177/0748730420927601.	1	440
23.5833	7.25	24.2167	8.76667	40.2	Ireland	0	Raman & Coogan	2021	Raman S, Coogan AN. Effects of societal-level COVID-19 mitigation measures on the timing and quality of sleep in Ireland. Sleep Med. 2021 Feb 15:S1389-9457(21)00122-2. doi: 10.1016/j.sleep.2021.02.024.	1	441
22.4	7.18333	23.5167	8.86667	15.8	New Zealand	2	Steenekamp et al	2021	Steenekamp T, Zaslona J, Gander P, Rowlands D, Leigh Signal T. Sleep/wake behaviour of competitive adolescent athletes in New Zealand: insight into the impact of early morning training. Sleep Med. 2021 Jan;77:88-95. doi: 10.1016/j.sleep.2020.11.023.	1	442
22.2	7.3	23.45	9.5	10.8	Mexico	0	Arrona-Palacios et al	2021	Arrona-Palacios A, Díaz-Morales JF, Adan A. Sleep habits and circadian preferences in school-aged children attending a Mexican double-shift school system. Sleep Med. 2021 Feb 13;81:116-119. doi: 10.1016/j.sleep.2021.02.016.	1	443
19.7833	7.01667	20.2167	7.28333	3.1	New Zealand	0	Muller et al	2020	Muller D, Paine SJ, Wu LJ, Signal TL. Sleep timing and sleep problems of preschoolers in Aotearoa/New Zealand: relationships with ethnicity and socioeconomic position. Sleep Med. 2020 Dec;76:1-9. doi: 10.1016/j.sleep.2020.09.020.	1	444
19.3833	6.76667	19.6167	6.96667	3.2	New Zealand	0	Muller et al	2020	Muller D, Paine SJ, Wu LJ, Signal TL. Sleep timing and sleep problems of preschoolers in Aotearoa/New Zealand: relationships with ethnicity and socioeconomic position. Sleep Med. 2020 Dec;76:1-9. doi: 10.1016/j.sleep.2020.09.020.	1	445
22.6667	5.66667	24.2667	8.48333	13.8	Qatar	2	Lolli et al	2021	Lolli L, Cardinale M, Lopez E, Maasar MF, Marthinussen J, Bonanno D, Gregson W, Di Salvo V. An objective description of routine sleep habits in elite youth football players from the Middle-East. Sleep Med. 2021 Jan 23;80:96-99. doi: 10.1016/j.sleep.2021.01.029.	1	446
24	7.5	25	9	40.4	Portugal	0	Reis et al	2020	Reis C, Madeira SG, Lopes LV,Paiva T and Roenneberg T. Validation of the Portuguese Variant of the Munich Chronotype Questionnaire (MCTQ PT ). Front. Physiol. 2020, 11:795. doi: 10.3389/fphys.2020.00795	1	447
21.4167	6.41667	22.0833	8.08333	3	Singapore	0	Lim et al	2021	Lim MTC, Ramamurthy MB, Aishworiya R, Rajgor DD, Tran AP, Hiriyur P, Kunaseelan S, Jabri M, Goh DYT. School closure during the coronavirus disease 2019 (COVID-19) pandemic - Impact on children's sleep. Sleep Med. 2021 Feb;78:108-114. doi: 10.1016/j.sleep.2020.12.025.	1	448
21.6	7.1	21.6	7.8	4	Singapore	0	Lim et al	2021	Lim MTC, Ramamurthy MB, Aishworiya R, Rajgor DD, Tran AP, Hiriyur P, Kunaseelan S, Jabri M, Goh DYT. School closure during the coronavirus disease 2019 (COVID-19) pandemic - Impact on children's sleep. Sleep Med. 2021 Feb;78:108-114. doi: 10.1016/j.sleep.2020.12.025.	1	449
21.2	6.3	21.9	8	8	Singapore	0	Lim et al	2021	Lim MTC, Ramamurthy MB, Aishworiya R, Rajgor DD, Tran AP, Hiriyur P, Kunaseelan S, Jabri M, Goh DYT. School closure during the coronavirus disease 2019 (COVID-19) pandemic - Impact on children's sleep. Sleep Med. 2021 Feb;78:108-114. doi: 10.1016/j.sleep.2020.12.025.	1	450
22.5	6.1	23.2	8.7	14	Singapore	0	Lim et al	2021	Lim MTC, Ramamurthy MB, Aishworiya R, Rajgor DD, Tran AP, Hiriyur P, Kunaseelan S, Jabri M, Goh DYT. School closure during the coronavirus disease 2019 (COVID-19) pandemic - Impact on children's sleep. Sleep Med. 2021 Feb;78:108-114. doi: 10.1016/j.sleep.2020.12.025.	1	451
23.8	6.45	24.25	7.575	40.2	USA	2	Lucassen et al	2013	Lucassen EA, Zhao X, Rother KI, Mattingly MS, Courville AB, et al. Evening Chronotype Is Associated with Changes in Eating Behavior, More Sleep Apnea, and Increased Stress Hormones in Short Sleeping Obese Individuals. PLoS ONE 2013, 8(3): e56519. doi:10.1371/journal.pone.0056519	1	452
23.2833	6.78333	25.5167	11.2167	19.4	USA	0	Veronda & Irish	2020	Veronda AC, Irish LA. An examination of eating misalignment: The discrepancy between preferred and actual timing of food intake. Chronobiol Int. 2020 Dec 21:1-8. doi: 10.1080/07420528.2020.1861000.	1	453
23.2	6.9	23.8	8.05	14.2	Italy	2	Alfonsi et al	2020	Alfonsi V, Palmizio R, Rubino A, Scarpelli S, Gorgoni M, D'Atri A, Pazzaglia M, Ferrara M, Giuliano S, De Gennaro L. The Association Between School Start Time and Sleep Duration, Sustained Attention, and Academic Performance. Nat Sci Sleep. 2020 Dec 10;12:1161-1172. doi: 10.2147/NSS.S273875.	1	454
22.3833	7.08333	23.3833	8.28333	11	Scotland	0	Lyall et al	2020	Lyall LM, Sangha N, Wyse C, Hindle E, Haughton D, Campbell K, Brown J, Moore L, Simpson SA, Inchley JC, Smith DJ. Accelerometry-assessed sleep duration and timing in late childhood and adolescence in Scottish schoolchildren: A feasibility study. PLoS One. 2020 Dec 1;15(12):e0242080. doi: 10.1371/journal.pone.0242080.	1	455
22.8333	7	23.6	8.53333	12.4	Scotland	0	Lyall et al	2020	Lyall LM, Sangha N, Wyse C, Hindle E, Haughton D, Campbell K, Brown J, Moore L, Simpson SA, Inchley JC, Smith DJ. Accelerometry-assessed sleep duration and timing in late childhood and adolescence in Scottish schoolchildren: A feasibility study. PLoS One. 2020 Dec 1;15(12):e0242080. doi: 10.1371/journal.pone.0242080.	1	456
24.7333	6.8	24.9167	9.03333	19.7	Japan	0	Kayaba et al	2020	Kayaba M, Matsushita T, Enomoto M, Kanai C, Katayama N, Inoue Y, Sasai-Sakuma T. Impact of sleep problems on daytime function in school life: a cross-sectional study involving Japanese university students. BMC Public Health. 2020 Mar 20;20(1):371. doi: 10.1186/s12889-020-08483-1.	1	457
23.861	6.2005	24.193	7.8175	42.8	Japan	0	Ikeda et al	2021	Ikeda H, Kubo T, Sasaki T, Liu X, Matsuo T, So R, Matsumoto S, Takahashi M. Daytime Workers with Longer Daily Rest Periods Have Smaller Sleep Debt and Social Jetlag: A Cross-Sectional Web Survey. Behav Sleep Med. 2021 Jan-Feb;19(1):99-109. doi: 10.1080/15402002.2020.1714623.	1	458
24.4167	6.43333	24.6	8.68333	19.9	Japan	0	Kayaba et al	2021	Kayaba M, Matsushita T, Katayama N, Inoue Y, Sasai-Sakuma T. Chronotype and its association with lifestyle, health-related quality of life and academic performance among Japanese nursing students: A cross-sectional study. Research Square; 2020. DOI: 10.21203/rs.3.rs-51264/v1.	1	459
25.16	7.9	25.98	10.1	19.6	USA	1	Taylor et al	2020	Taylor BJ, Bowman MA, Brindle A, Hasler BP, Roecklein KA, Krafty RT, Matthews KA, Hall MH. Evening chronotype, alcohol use disorder severity, and emotion regulation in college students. Chronobiol Int. 2020 Dec;37(12):1725-1735. doi: 10.1080/07420528.2020.1800028.	1	460
24.9833	8.51667	25.6833	9.66667	23.9	Italy	2	Cellini et al	2020	Cellini N, Menghini L, Mercurio M, Vanzetti V, Bergamo D, Sarlo M. Sleep quality and quantity in Italian University students: an actigraphic study. Chronobiol Int. 2020 Nov;37(11):1538-1551. doi: 10.1080/07420528.2020.1773494.	1	461
23.5167	6.7	25.1333	9.48333	16.1	Germany	2	Keller et al	2017	Keller LK, Grünewald B, Vetter C, Roenneberg T, Schulte-Körne G. Not later, but longer: sleep, chronotype and light exposure in adolescents with remitted depression compared to healthy controls. Eur Child Adolesc Psychiatry. 2017 Oct;26(10):1233-1244. doi: 10.1007/s00787-017-0977-z.	1	462
22.8333	5.91667	23.6667	7.55	64.7	Sweden	2	Garefelt et al	2020	Garefelt J, Gershagen S, Kecklund G, Westerlund H, Platts LG. How does cessation of work affect sleep? Prospective analyses of sleep duration, timing and efficiency from the Swedish Retirement Study. J Sleep Res. 2020 Aug 19:e13157. doi: 10.1111/jsr.13157.	1	463
23.3667	7.08333	23.8333	7.7	65.7	Sweden	2	Garefelt et al	2020	Garefelt J, Gershagen S, Kecklund G, Westerlund H, Platts LG. How does cessation of work affect sleep? Prospective analyses of sleep duration, timing and efficiency from the Swedish Retirement Study. J Sleep Res. 2020 Aug 19:e13157. doi: 10.1111/jsr.13157.	1	464
23.3667	6.98333	23.65	7.45	66.7	Sweden	2	Garefelt et al	2020	Garefelt J, Gershagen S, Kecklund G, Westerlund H, Platts LG. How does cessation of work affect sleep? Prospective analyses of sleep duration, timing and efficiency from the Swedish Retirement Study. J Sleep Res. 2020 Aug 19:e13157. doi: 10.1111/jsr.13157.	1	465
22.925	6.54183	23.61	8.221	14.8	USA	1	Dong et al	2020	Dong L, Dolsen MR, Martinez AJ, Notsu H, Harvey AG. A transdiagnostic sleep and circadian intervention for adolescents: six-month follow-up of a randomized controlled trial. J Child Psychol Psychiatry. 2020 Jun;61(6):653-661. doi: 10.1111/jcpp.13154.	1	466
21.7167	5.25	21.9667	5.26667	41.6	Brasil	1,2	Martins et al	2020	Martins AJ, Isherwood CM, Vasconcelos SP, Lowden A, Skene DJ, Moreno CRC. The effect of urbanization on sleep, sleep/wake routine, and metabolic health of residents in the Amazon region of Brazil. Chronobiol Int. 2020 Aug 11:1-9. doi: 10.1080/07420528.2020.1802287.	1	467
23.3	6	23.9167	6.78333	38.8	Brasil	1,2	Martins et al	2020	Martins AJ, Isherwood CM, Vasconcelos SP, Lowden A, Skene DJ, Moreno CRC. The effect of urbanization on sleep, sleep/wake routine, and metabolic health of residents in the Amazon region of Brazil. Chronobiol Int. 2020 Aug 11:1-9. doi: 10.1080/07420528.2020.1802287.	1	468
24.9333	8.38333	25.7	10.6833	19	Turkey	0	Önder	2021	Önder I. Association of happiness with morningness - eveningness preference, sleep-related variables and academic performance in university students, Biological Rhythm Research, 2021	1	469
25.3667	8.86667	26.2833	11.2	20	Turkey	0	Önder	2021	Önder I. Association of happiness with morningness - eveningness preference, sleep-related variables and academic performance in university students, Biological Rhythm Research, 2021	1	470
25.2833	8.7	26.1833	10.9833	21	Turkey	0	Önder	2021	Önder I. Association of happiness with morningness - eveningness preference, sleep-related variables and academic performance in university students, Biological Rhythm Research, 2021	1	471
24.8667	8.38333	26.05	10.7833	23	Turkey	0	Önder	2021	Önder I. Association of happiness with morningness - eveningness preference, sleep-related variables and academic performance in university students, Biological Rhythm Research, 2021	1	472
21.4833	5.26667	22.0167	7.66667	13.5	Nigeria	0	Olorunmoteni et al	2018	Olorunmoteni OE, Fatusi AO, Komolafe MA, Omisore A. Sleep pattern, socioenvironmental factors, and use of electronic devices among Nigerian school-attending adolescents. Sleep Health. 2018 Dec;4(6):551-557. doi: 10.1016/j.sleh.2018.09.002.	1	473
24.3333	7.41667	25.6	10.0667	15.8	Iceland	2	Stefansdottir et al	2020	Stefansdottir R, Rognvaldsdottir V, Gestsdottir S, Gudmundsdottir SL, Chen KY, Brychta RJ, Johannsson E. Changes in sleep and activity from age 15 to 17 in students with traditional and college-style school schedules. Sleep Health. 2020 Dec;6(6):749-757. doi: 10.1016/j.sleh.2020.04.009.	1	474
24.8833	7.78333	26.4	10.25	17.6	Iceland	2	Stefansdottir et al	2020	Stefansdottir R, Rognvaldsdottir V, Gestsdottir S, Gudmundsdottir SL, Chen KY, Brychta RJ, Johannsson E. Changes in sleep and activity from age 15 to 17 in students with traditional and college-style school schedules. Sleep Health. 2020 Dec;6(6):749-757. doi: 10.1016/j.sleh.2020.04.009.	1	475
20.8	7.2	21	7.4	4.7	Finland	1	Hiltunen et al	2021	Hiltunen P, Leppänen MH, Ray C, Määttä S, Vepsäläinen H, Koivusilta L, Sajaniemi N, Erkkola M, Roos E. Relationship between screen time and sleep among Finnish preschool children: results from the DAGIS study. Sleep Med. 2021 Jan;77:75-81. doi: 10.1016/j.sleep.2020.11.008.	1	476
23.1667	5.9	24.35	7.68333	44	USA	2	Zhang et al	2020	Zhang R, Tomasi D, Shokri-Kojori E, Wiers CE, Wang GJ, Volkow ND. Sleep inconsistency between weekends and weekdays is associated with changes in brain function during task and rest. Sleep. 2020 Oct 13;43(10):zsaa076. doi: 10.1093/sleep/zsaa076.	1	477
23.8167	6.5	24.3	8.25	33.6	Poland	0	Waleriańczyk et al	2020	Waleriańczyk W, Pruszczak D & Stolarski M. Testing the role of midpoint sleep and social jetlag in the context of work psychology: an exploratory study, Biological Rhythm Research, 2020, 51:7, 1026-1043, DOI: 10.1080/09291016.2019.1571707	1	478
23.0667	7	23.7667	8.4	12	India	0	Dutta et al	2020	Dutta K, Mukherjee R, Sen D & Sahu S.Effect of COVID-19 lockdown on sleep behavior and screen exposure time: an observational study among Indian school children, Biological Rhythm Research, 2020. DOI: 10.1080/09291016.2020.1825284	1	479
22.8	7.13333	23.8833	9.08333	30	Finland	0	Merikanto & Partonen	2020	Merikanto I, Partonen T. Increase in eveningness and insufficient sleep among adults in population-based cross-sections from 2007 to 2017. Sleep Med. 2020 Nov;75:368-379. doi: 10.1016/j.sleep.2020.07.046.	1	480
22.6417	6.89167	23.4917	8.50833	40	Finland	0	Merikanto & Partonen	2020	Merikanto I, Partonen T. Increase in eveningness and insufficient sleep among adults in population-based cross-sections from 2007 to 2017. Sleep Med. 2020 Nov;75:368-379. doi: 10.1016/j.sleep.2020.07.046.	1	481
22.5	6.5	23.3083	8.29167	50	Finland	0	Merikanto & Partonen	2020	Merikanto I, Partonen T. Increase in eveningness and insufficient sleep among adults in population-based cross-sections from 2007 to 2017. Sleep Med. 2020 Nov;75:368-379. doi: 10.1016/j.sleep.2020.07.046.	1	482
22.45	6.66667	23.0667	7.96667	60	Finland	0	Merikanto & Partonen	2020	Merikanto I, Partonen T. Increase in eveningness and insufficient sleep among adults in population-based cross-sections from 2007 to 2017. Sleep Med. 2020 Nov;75:368-379. doi: 10.1016/j.sleep.2020.07.046.	1	483
22.5583	7.325	22.8167	7.7	70	Finland	0	Merikanto & Partonen	2020	Merikanto I, Partonen T. Increase in eveningness and insufficient sleep among adults in population-based cross-sections from 2007 to 2017. Sleep Med. 2020 Nov;75:368-379. doi: 10.1016/j.sleep.2020.07.046.	1	484
23.2167	7.3	23.4333	8.8	5.5	Korea	0	Rhie et al	2011	Rhie S, Lee S, Chae KY. Sleep patterns and school performance of Korean adolescents assessed using a Korean version of the pediatric daytime sleepiness scale. Korean J Pediatr. 2011 Jan;54(1):29-35. doi: 10.3345/kjp.2011.54.1.29.	1	485
23.6	7.3	24.1167	9.7	8	Korea	0	Rhie et al	2011	Rhie S, Lee S, Chae KY. Sleep patterns and school performance of Korean adolescents assessed using a Korean version of the pediatric daytime sleepiness scale. Korean J Pediatr. 2011 Jan;54(1):29-35. doi: 10.3345/kjp.2011.54.1.29.	1	486
24.5667	6.45	24.7833	9.41667	11	Korea	0	Rhie et al	2011	Rhie S, Lee S, Chae KY. Sleep patterns and school performance of Korean adolescents assessed using a Korean version of the pediatric daytime sleepiness scale. Korean J Pediatr. 2011 Jan;54(1):29-35. doi: 10.3345/kjp.2011.54.1.29.	1	487
22.3667	6.35	24.3833	9.76667	15.6	USA	0	Mathew et al	2020	Mathew GM, Hale L, Chang AM. Social jetlag, eating behaviours and BMI among adolescents in the USA. Br J Nutr. 2020 Nov 14;124(9):979-987. doi: 10.1017/S0007114520001804.	1	488
22.3667	6.35	24.3833	9.76667	22	Norway	0	Sivertsen et al	2021	Sivertsen B, Harvey AG, Gradisar M, Pallesen S, Hysing M. Delayed sleep-wake phase disorder in young adults: prevalence and correlates from a national survey of Norwegian university students. Sleep Med. 2021 Jan;77:184-191. doi: 10.1016/j.sleep.2020.09.028.	1	489
21.375	5.41667	22	6.33333	4	Germany	0	Ricci et al	2020	Ricci C, Parra-Robledo Z, Rothenbacher D, Díaz-Morales JF, Genuneit J. The Parent's Chronotype and Child's Sleeping Quality in Association with Relationship Satisfaction. Clocks Sleep. 2020 Sep 18;2(3):375-389. doi: 10.3390/clockssleep2030028.	1	490
21.375	5.33333	22.5	6.54167	5	Germany	0	Ricci et al	2020	Ricci C, Parra-Robledo Z, Rothenbacher D, Díaz-Morales JF, Genuneit J. The Parent's Chronotype and Child's Sleeping Quality in Association with Relationship Satisfaction. Clocks Sleep. 2020 Sep 18;2(3):375-389. doi: 10.3390/clockssleep2030028.	1	491
21.5	5.29167	22.375	6.29167	6	Germany	0	Ricci et al	2020	Ricci C, Parra-Robledo Z, Rothenbacher D, Díaz-Morales JF, Genuneit J. The Parent's Chronotype and Child's Sleeping Quality in Association with Relationship Satisfaction. Clocks Sleep. 2020 Sep 18;2(3):375-389. doi: 10.3390/clockssleep2030028.	1	492
22.1333	7.95	22.5833	8.75	3.9	Hong Kong	0	Lan et al	2020	Lan QY, Chan KC, Yu KN, Chan NY, Wing YK, Li AM, Au CT. Sleep duration in preschool children and impact of screen time. Sleep Med. 2020 Dec;76:48-54. doi: 10.1016/j.sleep.2020.09.024.	1	493
25.2333	8.48333	25.3667	9.13333	20	China	2	Lee et al	2020	Lee PH, Marek J, Nálevka P. Crowdsourced smartphone data reveal altered sleep/wake pattern in quarantined Chinese during the COVID-19 outbreak. Chronobiol Int. 2020 Aug;37(8):1181-1190. doi: 10.1080/07420528.2020.1792486.	1	494
24.8667	7.73333	24.95	8.11667	30	China	2	Lee et al	2020	Lee PH, Marek J, Nálevka P. Crowdsourced smartphone data reveal altered sleep/wake pattern in quarantined Chinese during the COVID-19 outbreak. Chronobiol Int. 2020 Aug;37(8):1181-1190. doi: 10.1080/07420528.2020.1792486.	1	495
25.15	7.88333	25.4	8.78333	40	China	2	Lee et al	2020	Lee PH, Marek J, Nálevka P. Crowdsourced smartphone data reveal altered sleep/wake pattern in quarantined Chinese during the COVID-19 outbreak. Chronobiol Int. 2020 Aug;37(8):1181-1190. doi: 10.1080/07420528.2020.1792486.	1	496
24.9667	7.06667	24.7	7.66667	50	China	2	Lee et al	2020	Lee PH, Marek J, Nálevka P. Crowdsourced smartphone data reveal altered sleep/wake pattern in quarantined Chinese during the COVID-19 outbreak. Chronobiol Int. 2020 Aug;37(8):1181-1190. doi: 10.1080/07420528.2020.1792486.	1	497
24.45	7.71667	24.45	7.63333	60	China	2	Lee et al	2020	Lee PH, Marek J, Nálevka P. Crowdsourced smartphone data reveal altered sleep/wake pattern in quarantined Chinese during the COVID-19 outbreak. Chronobiol Int. 2020 Aug;37(8):1181-1190. doi: 10.1080/07420528.2020.1792486.	1	498
23.25	8.48333	24.3167	9.6	23.6	Germany	2	Schoedel et al	2020	Schoedel R, Pargent F, Au Q, Völkel ST, Schuwerk T, Bühner M, Stachl C. To challenge the morning lark and the night owl: Using smartphone sensing data to investigate day–night behaviour patterns European Journal of Personality, 2020, 34 (5), 733-752	1	499
21.45	6.61667	22	7.66667	9.5	Hong Kong	0	Yu et al	2020	Yu BY, Yeung WF, Ho YS, Ho FYY, Chung KF, Lee RLT, Lam MY, Chen S. Associations between the Chronotypes and Eating Habits of Hong Kong School-Aged Children. Int J Environ Res Public Health. 2020 Apr 9;17(7):2583. doi: 10.3390/ijerph17072583.	1	500
22.1167	6.95	22.85	8.51667	9.1	Hong Kong	0	Yu et al	2020	Yu BY, Yeung WF, Ho YS, Ho FYY, Chung KF, Lee RLT, Lam MY, Chen S. Associations between the Chronotypes and Eating Habits of Hong Kong School-Aged Children. Int J Environ Res Public Health. 2020 Apr 9;17(7):2583. doi: 10.3390/ijerph17072583.	1	501
22.6167	7.11667	23.2083	9.29167	9.4	Hong Kong	0	Yu et al	2020	Yu BY, Yeung WF, Ho YS, Ho FYY, Chung KF, Lee RLT, Lam MY, Chen S. Associations between the Chronotypes and Eating Habits of Hong Kong School-Aged Children. Int J Environ Res Public Health. 2020 Apr 9;17(7):2583. doi: 10.3390/ijerph17072583.	1	502
21.5833	6.58333	22.075	7.825	9	Hong Kong	0	Yu et al	2020	Yu BY, Yeung WF, Ho YS, Ho FYY, Chung KF, Lee RLT, Lam MY, Chen S. Associations between the Chronotypes and Eating Habits of Hong Kong School-Aged Children. Int J Environ Res Public Health. 2020 Apr 9;17(7):2583. doi: 10.3390/ijerph17072583.	1	503
22.2	6.86667	22.8958	8.77083	9.3	Hong Kong	0	Yu et al	2020	Yu BY, Yeung WF, Ho YS, Ho FYY, Chung KF, Lee RLT, Lam MY, Chen S. Associations between the Chronotypes and Eating Habits of Hong Kong School-Aged Children. Int J Environ Res Public Health. 2020 Apr 9;17(7):2583. doi: 10.3390/ijerph17072583.	1	504
22.25	6.83333	23.4	8.83333	16.5	USA	0	AMHSI Team et al	2021	AMHSI Research Team; Milken Research Team, Roitblat Y, Burger J, Vaiman M, Nehuliaieva L, Buchris N, Shterenshis M. Owls and larks do not exist: COVID-19 quarantine sleep habits. Sleep Med. 2021 Jan;77:177-183. doi: 10.1016/j.sleep.2020.09.003.	1	505
22.4167	7.08333	23.9167	8.83333	40	USA	0	AMHSI Team et al	2021	AMHSI Research Team; Milken Research Team, Roitblat Y, Burger J, Vaiman M, Nehuliaieva L, Buchris N, Shterenshis M. Owls and larks do not exist: COVID-19 quarantine sleep habits. Sleep Med. 2021 Jan;77:177-183. doi: 10.1016/j.sleep.2020.09.003.	1	506
22.35	7.53333	23.15	8.73333	10.3	Italy	2	Tonetti et al	2020	Tonetti L, Martoni M, Filardi M, Fabbri M, Carissimi A, Giovagnoli S, Natale V. Variation of circadian activity rhythm according to body mass index in children. Sleep Med. 2020 Oct;74:33-38. doi: 10.1016/j.sleep.2020.05.022.	1	507
23.2167	6.73333	24.2	9.8	14.8	China	0	Chan et al	2020	Chan NY, Zhang J, Tsang CC, Li AM, Chan JWY, Wing YK, Li SX. The associations of insomnia symptoms and chronotype with daytime sleepiness, mood symptoms and suicide risk in adolescents. Sleep Med. 2020 Oct;74:124-131. doi: 10.1016/j.sleep.2020.05.035.	1	508
22.0167	6.95	23.3333	9.26667	15.6	Australia	0	Short et al	2013	Short MA, Gradisar M, Lack LC, Wright HR, Chatburn A. Estimating adolescent sleep patterns: parent reports versus adolescent self-report surveys, sleep diaries, and actigraphy. Nat Sci Sleep. 2013 Feb 12;5:23-6. doi: 10.2147/NSS.S38369.	1	509
22.95	7.05	23.95	8.43333	15.6	Australia	2	Short et al	2013	Short MA, Gradisar M, Lack LC, Wright HR, Chatburn A. Estimating adolescent sleep patterns: parent reports versus adolescent self-report surveys, sleep diaries, and actigraphy. Nat Sci Sleep. 2013 Feb 12;5:23-6. doi: 10.2147/NSS.S38369.	1	510
22.4667	7.11667	23.6333	8.5	15.6	Australia	1	Short et al	2013	Short MA, Gradisar M, Lack LC, Wright HR, Chatburn A. Estimating adolescent sleep patterns: parent reports versus adolescent self-report surveys, sleep diaries, and actigraphy. Nat Sci Sleep. 2013 Feb 12;5:23-6. doi: 10.2147/NSS.S38369.	1	511
22.4	6.9	23.9	9.36667	15.6	Australia	0	Short et al	2013	Short MA, Gradisar M, Lack LC, Wright HR, Chatburn A. Estimating adolescent sleep patterns: parent reports versus adolescent self-report surveys, sleep diaries, and actigraphy. Nat Sci Sleep. 2013 Feb 12;5:23-6. doi: 10.2147/NSS.S38369.	1	512
21.65	7.11667	22.1	7.98333	5	China	0	Liu et al	2021	Liu Z, Tang H, Jin Q, Wang G, Yang Z, Chen H, Yan H, Rao W, Owens J. Sleep of preschoolers during the coronavirus disease 2019 (COVID-19) outbreak. J Sleep Res. 2021 Feb;30(1):e13142. doi: 10.1111/jsr.13142.	1	513
23.7	7.03333	24.6	8.71667	29.7	Finland	2	Björkqvist et al	2020	Björkqvist J, Kuula J, Kuula L, Nurhonen M, Hovi P, Räikkönen K, Pesonen A, Kajantie E. Chronotype in very low birth weight adults - a sibling study. Chronobiol Int. 2020 Jul;37(7):1023-1033. doi: 10.1080/07420528.2020.1754847.	1	514
23.9667	6.75	24.5	8.58333	21.4	Brasil	0	Silva et al	2020	Silva ACPE, Dos Santos MJ, Góes Gitaí DL, de Miranda Coelho JAP, de Andrade TG. Depression and anxiety symptoms correlate with diurnal preference, sleep habits, and Per3 VNTR polymorphism (rs57875989) in a non-clinical sample. J Affect Disord. 2020 Dec 1;277:260-270. doi: 10.1016/j.jad.2020.07.138.	1	515
23.2417	7.75833	24.2	8.88333	25.5	UK	0	Muzni et al	2021	Muzni K, Groeger JA, Dijk DJ, Lazar AS. Self-reported sleep quality is more closely associated with mental and physical health than chronotype and sleep duration in young adults: A multi-instrument analysis. J Sleep Res. 2021 Feb;30(1):e13152. doi: 10.1111/jsr.13152.	1	516
23.7833	7.79167	25.05	9.91667	24.8	Ukraine	0	Senyk et al	2021	Senyk O., Jankowski K.S. & Cholii S. Ukrainian versions of the Composite Scale of Morningness and Munich Chronotype Questionnaire, Biological Rhythm Research, 2021, DOI: 10.1080/09291016.2020.1788807	1	517
21	5.43333	22.5667	8.71667	14.2	Brasil	0	Louzada & Menna-Barreto	2004	Louzada F. & Menna-Barreto L. Sleep–Wake Cycle in Rural Populations, Biological Rhythm Research, 2004, 35:1-2, 153-157, DOI: 10.1080/09291010412331313304	1	518
22.9667	7.08333	24.0167	9.7	15	UK	0	Orchard et al	2020	Orchard F, Gregory AM, Gradisar M, Reynolds S. Self-reported sleep patterns and quality amongst adolescents: cross-sectional and prospective associations with anxiety and depression. J Child Psychol Psychiatry. 2020 Oct;61(10):1126-1137. doi: 10.1111/jcpp.13288.	1	519
21.85	6.93333	23.3	9.66667	10.8	Croatia	0	Koscec et al	2020	Koscec Bjelajac A, Bakotic M, Ross B. Weekly alternation of morning and afternoon school start times: implications for sleep and daytime functioning of adolescents. Sleep. 2020 Aug 12;43(8):zsaa030. doi: 10.1093/sleep/zsaa030.	1	520
22.2167	6.83333	23.5833	9.53333	11.7	Croatia	0	Koscec et al	2020	Koscec Bjelajac A, Bakotic M, Ross B. Weekly alternation of morning and afternoon school start times: implications for sleep and daytime functioning of adolescents. Sleep. 2020 Aug 12;43(8):zsaa030. doi: 10.1093/sleep/zsaa030.	1	521
22.6167	6.93333	23.9333	9.83333	12.7	Croatia	0	Koscec et al	2020	Koscec Bjelajac A, Bakotic M, Ross B. Weekly alternation of morning and afternoon school start times: implications for sleep and daytime functioning of adolescents. Sleep. 2020 Aug 12;43(8):zsaa030. doi: 10.1093/sleep/zsaa030.	1	522
22.65	6.93333	24.2333	9.93333	13.7	Croatia	0	Koscec et al	2020	Koscec Bjelajac A, Bakotic M, Ross B. Weekly alternation of morning and afternoon school start times: implications for sleep and daytime functioning of adolescents. Sleep. 2020 Aug 12;43(8):zsaa030. doi: 10.1093/sleep/zsaa030.	1	523
22.9	6.36667	24.5167	10.3333	14.7	Croatia	0	Koscec et al	2020	Koscec Bjelajac A, Bakotic M, Ross B. Weekly alternation of morning and afternoon school start times: implications for sleep and daytime functioning of adolescents. Sleep. 2020 Aug 12;43(8):zsaa030. doi: 10.1093/sleep/zsaa030.	1	524
23.1833	6.51667	25.1833	10.6	15.7	Croatia	0	Koscec et al	2020	Koscec Bjelajac A, Bakotic M, Ross B. Weekly alternation of morning and afternoon school start times: implications for sleep and daytime functioning of adolescents. Sleep. 2020 Aug 12;43(8):zsaa030. doi: 10.1093/sleep/zsaa030.	1	525
23.4333	6.43333	25.7833	10.7333	16.7	Croatia	0	Koscec et al	2020	Koscec Bjelajac A, Bakotic M, Ross B. Weekly alternation of morning and afternoon school start times: implications for sleep and daytime functioning of adolescents. Sleep. 2020 Aug 12;43(8):zsaa030. doi: 10.1093/sleep/zsaa030.	1	526
23.4167	6.41667	26.5333	10.9833	17.6	Croatia	0	Koscec et al	2020	Koscec Bjelajac A, Bakotic M, Ross B. Weekly alternation of morning and afternoon school start times: implications for sleep and daytime functioning of adolescents. Sleep. 2020 Aug 12;43(8):zsaa030. doi: 10.1093/sleep/zsaa030.	1	527
25.5633	8.06333	26.3358	9.38417	23	USA	2	Bottary et al	2020	Bottary, R., Cunningham, T., Spencer, R., & Pace-Schott, E. Social Jetlag is Independently Associated with Chronotype and Poor Memory for Extinguished Fear. Experimental Results, 2020, 1, E22. doi:10.1017/exp.2020.26	1	528
21.675	6.975	23.1083	9.91667	10.8	Mexico	0	Borrani et al	2020	Borrani J, Guerra G, García A, Ramírez C, Valdez P. The effect of pubertal development on the sleep-wake cycle. Sleep Science 2020, 13 (0), 17-22.	1	529
22.225	6.75833	24.025	9.6	11	Mexico	0	Borrani et al	2020	Borrani J, Guerra G, García A, Ramírez C, Valdez P. The effect of pubertal development on the sleep-wake cycle. Sleep Science 2020, 13 (0), 17-22.	1	530
23.0333	6.28333	24.45	7.13333	16	USA	0	Gradisar et al	2013	Gradisar M, Wolfson AR, Harvey AG, Hale L, Rosenberg R, Czeisler CA. The sleep and technology use of Americans: findings from the National Sleep Foundation's 2011 Sleep in America poll. J Clin Sleep Med. 2013 Dec 15;9(12):1291-9. doi: 10.5664/jcsm.3272.	1	531
23.9667	6.96667	25.1667	7.33333	24	USA	0	Gradisar et al	2013	Gradisar M, Wolfson AR, Harvey AG, Hale L, Rosenberg R, Czeisler CA. The sleep and technology use of Americans: findings from the National Sleep Foundation's 2011 Sleep in America poll. J Clin Sleep Med. 2013 Dec 15;9(12):1291-9. doi: 10.5664/jcsm.3272.	1	532
23.2	5.98333	23.85	7.85	32	USA	0	Gradisar et al	2013	Gradisar M, Wolfson AR, Harvey AG, Hale L, Rosenberg R, Czeisler CA. The sleep and technology use of Americans: findings from the National Sleep Foundation's 2011 Sleep in America poll. J Clin Sleep Med. 2013 Dec 15;9(12):1291-9. doi: 10.5664/jcsm.3272.	1	533
22.9667	5.95	23.45	7.31667	55	USA	0	Gradisar et al	2013	Gradisar M, Wolfson AR, Harvey AG, Hale L, Rosenberg R, Czeisler CA. The sleep and technology use of Americans: findings from the National Sleep Foundation's 2011 Sleep in America poll. J Clin Sleep Med. 2013 Dec 15;9(12):1291-9. doi: 10.5664/jcsm.3272.	1	534
23.7667	7.53333	25.5833	8.7	15.2	USA	0	Paksarian et al	2020	Paksarian D, Rudolph KE, Stapp EK, Dunster GP, He J, Mennitt D, Hattar S, Casey JA, James P, Merikangas KR. Association of Outdoor Artificial Light at Night With Mental Disorders and Sleep Patterns Among US Adolescents. JAMA Psychiatry. 2020 Jul 8;77(12):1266–75. doi: 10.1001/jamapsychiatry.2020.1935.	1	535
23.6	7.28333	24.4833	9.28333	35.1	Portugal	0	Reis et al	2020	Reis C, Pilz LK, Keller LK, Paiva T, Roenneberg T. Social timing influences sleep quality in patients with sleep disorders. Sleep Med. 2020 Jul;71:8-17. doi: 10.1016/j.sleep.2020.02.019.	1	536
22.1167	6.71667	24.35	10.3167	12.5	Sweden	0	Bauducco et al	2016	Bauducco SV, Flink IK, Jansson-Fröjmark M, Linton SJ. Sleep duration and patterns in adolescents: correlates and the role of daily stressors. Sleep Health. 2016 Sep;2(3):211-218. doi: 10.1016/j.sleh.2016.05.006.	1	537
22.4667	6.78333	24.7167	10.5667	15	Sweden	0	Bauducco et al	2016	Bauducco SV, Flink IK, Jansson-Fröjmark M, Linton SJ. Sleep duration and patterns in adolescents: correlates and the role of daily stressors. Sleep Health. 2016 Sep;2(3):211-218. doi: 10.1016/j.sleh.2016.05.006.	1	538
20.5333	6.98333	21.1083	7.61667	9	Australia	0	Olds et al	2010	Olds T, Maher C, Blunden S, Matricciani L. Normative data on the sleep habits of Australian children and adolescents. Sleep. 2010 Oct;33(10):1381-8. doi: 10.1093/sleep/33.10.1381.	1	539
20.825	7.05	21.1083	7.59167	10	Australia	0	Olds et al	2010	Olds T, Maher C, Blunden S, Matricciani L. Normative data on the sleep habits of Australian children and adolescents. Sleep. 2010 Oct;33(10):1381-8. doi: 10.1093/sleep/33.10.1381.	1	540
21.0917	7	21.7083	7.86667	11	Australia	0	Olds et al	2010	Olds T, Maher C, Blunden S, Matricciani L. Normative data on the sleep habits of Australian children and adolescents. Sleep. 2010 Oct;33(10):1381-8. doi: 10.1093/sleep/33.10.1381.	1	541
21.225	7.00833	21.95	8.25833	12	Australia	0	Olds et al	2010	Olds T, Maher C, Blunden S, Matricciani L. Normative data on the sleep habits of Australian children and adolescents. Sleep. 2010 Oct;33(10):1381-8. doi: 10.1093/sleep/33.10.1381.	1	542
21.4917	6.95	22.1667	8.16667	13	Australia	0	Olds et al	2010	Olds T, Maher C, Blunden S, Matricciani L. Normative data on the sleep habits of Australian children and adolescents. Sleep. 2010 Oct;33(10):1381-8. doi: 10.1093/sleep/33.10.1381.	1	543
21.8583	6.96667	22.3917	8.33333	14	Australia	0	Olds et al	2010	Olds T, Maher C, Blunden S, Matricciani L. Normative data on the sleep habits of Australian children and adolescents. Sleep. 2010 Oct;33(10):1381-8. doi: 10.1093/sleep/33.10.1381.	1	544
22.1833	7.04167	22.8583	8.73333	15	Australia	0	Olds et al	2010	Olds T, Maher C, Blunden S, Matricciani L. Normative data on the sleep habits of Australian children and adolescents. Sleep. 2010 Oct;33(10):1381-8. doi: 10.1093/sleep/33.10.1381.	1	545
22.575	6.99167	22.9667	8.83333	16	Australia	0	Olds et al	2010	Olds T, Maher C, Blunden S, Matricciani L. Normative data on the sleep habits of Australian children and adolescents. Sleep. 2010 Oct;33(10):1381-8. doi: 10.1093/sleep/33.10.1381.	1	546
22.65	7.23333	22.9083	8.98333	17.5	Australia	0	Olds et al	2010	Olds T, Maher C, Blunden S, Matricciani L. Normative data on the sleep habits of Australian children and adolescents. Sleep. 2010 Oct;33(10):1381-8. doi: 10.1093/sleep/33.10.1381.	1	547
21.4833	7.08333	22.8167	8.86667	10.5	Canada	0	Chaput et al	2016	Chaput JP, Janssen I. Sleep duration estimates of Canadian children and adolescents. J Sleep Res. 2016 Oct;25(5):541-548. doi: 10.1111/jsr.12410.	1	548
21.9667	6.96667	23.3833	9.31667	12.5	Canada	0	Chaput et al	2016	Chaput JP, Janssen I. Sleep duration estimates of Canadian children and adolescents. J Sleep Res. 2016 Oct;25(5):541-548. doi: 10.1111/jsr.12410.	1	549
22.6333	6.95	24.1833	9.8	14.5	Canada	0	Chaput et al	2016	Chaput JP, Janssen I. Sleep duration estimates of Canadian children and adolescents. J Sleep Res. 2016 Oct;25(5):541-548. doi: 10.1111/jsr.12410.	1	550
22.9167	7.06667	24.3667	9.76667	16.5	Canada	0	Chaput et al	2016	Chaput JP, Janssen I. Sleep duration estimates of Canadian children and adolescents. J Sleep Res. 2016 Oct;25(5):541-548. doi: 10.1111/jsr.12410.	1	551
21.7417	6.93333	23.0917	9.03333	12	Canada	0	Janssen et al	2019	Janssen I, Berg RL, Marlenga B, Pickett W. Sleep in Farm Adolescents. J Rural Health. 2019 Sep;35(4):436-441. doi: 10.1111/jrh.12341.	1	552
21.775	6.96667	23.2083	9.15	12	Canada	0	Janssen et al	2019	Janssen I, Berg RL, Marlenga B, Pickett W. Sleep in Farm Adolescents. J Rural Health. 2019 Sep;35(4):436-441. doi: 10.1111/jrh.12341.	1	553
22.525	6.825	23.9667	9.28333	15	Canada	0	Janssen et al	2019	Janssen I, Berg RL, Marlenga B, Pickett W. Sleep in Farm Adolescents. J Rural Health. 2019 Sep;35(4):436-441. doi: 10.1111/jrh.12341.	1	554
22.6083	6.975	24.1	9.75833	15	Canada	0	Janssen et al	2019	Janssen I, Berg RL, Marlenga B, Pickett W. Sleep in Farm Adolescents. J Rural Health. 2019 Sep;35(4):436-441. doi: 10.1111/jrh.12341.	1	555
23.01	6.56	23.97	8.42	13.9	USA	0	Mitchell et al	2020	Mitchell JA, Morales KH, Williamson AA, Huffnagle N, Ludwick A, Grant SFA, Dinges DF, Zemel BA. Changes in Sleep Duration and Timing During the Middle-to-High School Transition. J Adolesc Health. 2020 Dec;67(6):829-836. doi: 10.1016/j.jadohealth.2020.04.024.	1	556
23.2	6.5	24.55	8.8	14.9	USA	0	Mitchell et al	2020	Mitchell JA, Morales KH, Williamson AA, Huffnagle N, Ludwick A, Grant SFA, Dinges DF, Zemel BA. Changes in Sleep Duration and Timing During the Middle-to-High School Transition. J Adolesc Health. 2020 Dec;67(6):829-836. doi: 10.1016/j.jadohealth.2020.04.024.	1	557
21	6.5	21.75	8	10	China	0	Wang et al	2017	Wang Y, Chen Z, Guo F, Huang Z, Jiang L, Duan Q, Zhang J. Sleep patterns and their association with depression and behavior problems among Chinese adolescents in different grades. Psych J. 2017 Dec;6(4):253-262. doi: 10.1002/pchj.189.	1	558
21.25	6.33333	22	8	11	China	0	Wang et al	2017	Wang Y, Chen Z, Guo F, Huang Z, Jiang L, Duan Q, Zhang J. Sleep patterns and their association with depression and behavior problems among Chinese adolescents in different grades. Psych J. 2017 Dec;6(4):253-262. doi: 10.1002/pchj.189.	1	559
21.6667	6.33333	22	8	12	China	0	Wang et al	2017	Wang Y, Chen Z, Guo F, Huang Z, Jiang L, Duan Q, Zhang J. Sleep patterns and their association with depression and behavior problems among Chinese adolescents in different grades. Psych J. 2017 Dec;6(4):253-262. doi: 10.1002/pchj.189.	1	560
22.0833	6.33333	22.3333	8	13	China	0	Wang et al	2017	Wang Y, Chen Z, Guo F, Huang Z, Jiang L, Duan Q, Zhang J. Sleep patterns and their association with depression and behavior problems among Chinese adolescents in different grades. Psych J. 2017 Dec;6(4):253-262. doi: 10.1002/pchj.189.	1	561
22.5	6.33333	22.5	8	14	China	0	Wang et al	2017	Wang Y, Chen Z, Guo F, Huang Z, Jiang L, Duan Q, Zhang J. Sleep patterns and their association with depression and behavior problems among Chinese adolescents in different grades. Psych J. 2017 Dec;6(4):253-262. doi: 10.1002/pchj.189.	1	562
22.5	6.25	22.5	8.5	15	China	0	Wang et al	2017	Wang Y, Chen Z, Guo F, Huang Z, Jiang L, Duan Q, Zhang J. Sleep patterns and their association with depression and behavior problems among Chinese adolescents in different grades. Psych J. 2017 Dec;6(4):253-262. doi: 10.1002/pchj.189.	1	563
22.8333	6.25	22.5	8.5	16	China	0	Wang et al	2017	Wang Y, Chen Z, Guo F, Huang Z, Jiang L, Duan Q, Zhang J. Sleep patterns and their association with depression and behavior problems among Chinese adolescents in different grades. Psych J. 2017 Dec;6(4):253-262. doi: 10.1002/pchj.189.	1	564
23	6.16667	22.6667	8.5	17	China	0	Wang et al	2017	Wang Y, Chen Z, Guo F, Huang Z, Jiang L, Duan Q, Zhang J. Sleep patterns and their association with depression and behavior problems among Chinese adolescents in different grades. Psych J. 2017 Dec;6(4):253-262. doi: 10.1002/pchj.189.	1	565
23.1	6.56667	23.8	9.15	16.4	USA	2	Simon et al	2020	Simon SL, Diniz Behn C, Laikin A, Kaar JL, Rahat H, Cree-Green M, Wright KP Jr, Nadeau KJ. Sleep & Circadian Health are Associated with Mood & Behavior in Adolescents with Overweight/Obesity. Behav Sleep Med. 2020 Jul-Aug;18(4):550-559. doi: 10.1080/15402002.2019.1629444.	1	566
22.805	5.905	23.745	8.72	13.5	Brasil	2	Carvalho-Mendes et al	2020	Carvalho-Mendes RP, Dunster GP, de la Iglesia HO, Menna-Barreto L. Afternoon School Start Times Are Associated with a Lack of Both Social Jetlag and Sleep Deprivation in Adolescents. J Biol Rhythms. 2020 Aug;35(4):377-390. doi: 10.1177/0748730420927603.	1	567
24.2	8	24.9	9.5	15	USA	2	James et al	2020	James S, Chang AM, Buxton OM, Hale L. Disparities in adolescent sleep health by sex and ethnoracial group. SSM Popul Health. 2020 Apr 9;11:100581. doi: 10.1016/j.ssmph.2020.100581.	1	568
23.2333	6.31667	23.5667	8.06667	13.5	Japan	0	Ojio et al	2020	Ojio Y, Kishi A, Sasaki T, Togo F. Association of depressive symptoms with habitual sleep duration and sleep timing in junior high school students. Chronobiol Int. 2020 Jun;37(6):877-886. doi: 10.1080/07420528.2020.1746796.	1	569
23.6167	6.28333	25.7833	11.3667	13.5	Argentina	0	Goldin et al	2020	Goldin AP, Sigman M, Braier G, Golombek DA, Leone MJ. Interplay of chronotype and school timing predicts school performance. Nat Hum Behav. 2020 Apr;4(4):387-396. doi: 10.1038/s41562-020-0820-2.	1	570
24.5	6.38333	26.3	11.7167	17.5	Argentina	0	Goldin et al	2020	Goldin AP, Sigman M, Braier G, Golombek DA, Leone MJ. Interplay of chronotype and school timing predicts school performance. Nat Hum Behav. 2020 Apr;4(4):387-396. doi: 10.1038/s41562-020-0820-2.	1	571
22.3333	6.86667	23.9833	9.91667	13.9	Sweden	0	Hena & Garmy	2020	Hena M, Garmy P. Social Jetlag and Its Association With Screen Time and Nighttime Texting Among Adolescents in Sweden: A Cross-Sectional Study. Front Neurosci. 2020 Feb 18;14:122. doi: 10.3389/fnins.2020.00122.	1	572
23.03	7.64	24.9708	7.64083	15	Korea	0	Han & Chung	2020	Han CH, Chung J. Late Chronotype is Associated with Adolescent Asthma: Assessment Using the Korean-Version MCTQ. Int J Environ Res Public Health. 2020 Apr 26;17(9):3000. doi: 10.3390/ijerph17093000.	1	573
24.7	7.03333	24.95	8.96667	36.9	Japan	0	Shimura et al	2020	Shimura A, Sugiura K, Inoue M, Misaki S, Tanimoto Y, Oshima A, Tanaka T, Yokoi K, Inoue T. Which sleep hygiene factors are important? comprehensive assessment of lifestyle habits and job environment on sleep among office workers. Sleep Health. 2020 Jun;6(3):288-298. doi: 10.1016/j.sleh.2020.02.001.	1	574
22.3583	6.16667	23.525	8.79167	15.2	USA	0	Widome et al	2020	Widome R, Berger AT, Iber C, Wahlstrom K, Laska MN, Kilian G, Redline S, Erickson DJ. Association of Delaying School Start Time With Sleep Duration, Timing, and Quality Among Adolescents. JAMA Pediatr. 2020 Jul 1;174(7):697-704. doi: 10.1001/jamapediatrics.2020.0344.	1	575
22.1167	7.31667	23.4833	9.68333	12.3	USA	0	Johnson et al	2020	Johnson DA, Reid M, Vu TT, Gallo LC, Daviglus ML, Isasi CR, Redline S, Carnethon M. Associations of sleep duration and social jetlag with cardiometabolic risk factors in the study of Latino youth. Sleep Health. 2020 Oct;6(5):563-569. doi: 10.1016/j.sleh.2020.02.017.	1	576
23.65	6.11667	25.5	10.7833	14.5	Saudi Arabia	0	Merdad et al	2014	Merdad RA, Merdad LA, Nassif RA, El-Derwi D, Wali SO. Sleep habits in adolescents of Saudi Arabia; distinct patterns and extreme sleep schedules. Sleep Med. 2014 Nov;15(11):1370-8. doi: 10.1016/j.sleep.2014.06.008.	1	577
23.6833	6.51667	26.0833	11.9	16	Saudi Arabia	0	Merdad et al	2014	Merdad RA, Merdad LA, Nassif RA, El-Derwi D, Wali SO. Sleep habits in adolescents of Saudi Arabia; distinct patterns and extreme sleep schedules. Sleep Med. 2014 Nov;15(11):1370-8. doi: 10.1016/j.sleep.2014.06.008.	1	578
24	7.05	26.5833	12.3	17	Saudi Arabia	0	Merdad et al	2014	Merdad RA, Merdad LA, Nassif RA, El-Derwi D, Wali SO. Sleep habits in adolescents of Saudi Arabia; distinct patterns and extreme sleep schedules. Sleep Med. 2014 Nov;15(11):1370-8. doi: 10.1016/j.sleep.2014.06.008.	1	579
24.05	7.03333	26.6833	12.2167	18	Saudi Arabia	0	Merdad et al	2014	Merdad RA, Merdad LA, Nassif RA, El-Derwi D, Wali SO. Sleep habits in adolescents of Saudi Arabia; distinct patterns and extreme sleep schedules. Sleep Med. 2014 Nov;15(11):1370-8. doi: 10.1016/j.sleep.2014.06.008.	1	580
23.9167	7.46667	26.9	12.4	21	Saudi Arabia	0	Merdad et al	2014	Merdad RA, Merdad LA, Nassif RA, El-Derwi D, Wali SO. Sleep habits in adolescents of Saudi Arabia; distinct patterns and extreme sleep schedules. Sleep Med. 2014 Nov;15(11):1370-8. doi: 10.1016/j.sleep.2014.06.008.	1	581
23.0333	7.58333	24.15	9.31667	15.4	Netherlands	2	Dewald-Kaufmann et al	2013	Dewald-Kaufmann JF, Oort FJ, Meijer AM. The effects of sleep extension on sleep and cognitive performance in adolescents with chronic sleep reduction: an experimental study. Sleep Med. 2013 Jun;14(6):510-7. doi: 10.1016/j.sleep.2013.01.012.	1	582
23.6083	6.89167	25.0417	10.2917	16.8	Finland	0	Kuula et al	2020	Kuula L, Partonen T, Pesonen AK. Emotions relating to romantic love-further disruptors of adolescent sleep. Sleep Health. 2020 Apr;6(2):159-165. doi: 10.1016/j.sleh.2020.01.006.	1	583
24.175	6.95833	25.6	10.8	17.5	Finland	0	Kuula et al	2020	Kuula L, Partonen T, Pesonen AK. Emotions relating to romantic love-further disruptors of adolescent sleep. Sleep Health. 2020 Apr;6(2):159-165. doi: 10.1016/j.sleh.2020.01.006.	1	584
24.6167	8.05	25.6333	10.1	16.8	Finland	2	Kuula et al	2020	Kuula L, Partonen T, Pesonen AK. Emotions relating to romantic love-further disruptors of adolescent sleep. Sleep Health. 2020 Apr;6(2):159-165. doi: 10.1016/j.sleh.2020.01.006.	1	585
24.8	6.41667	25.7833	9.55	16.3	USA	2	Misiunaite et al	2020	Misiunaite I, Eastman CI, Crowley SJ. Circadian Phase Advances in Response to Weekend Morning Light in Adolescents With Short Sleep and Late Bedtimes on School Nights. Front Neurosci. 2020 Feb 12;14:99. doi: 10.3389/fnins.2020.00099.	1	586
24.01	6.41	24.425	7.675	45.1	Japan	0	Komada et al	2021	Komada Y, Okajima I, Kitamura S, Inoue Y. A survey on social jetlag in Japan: a nationwide, cross-sectional internet survey. Sleep Biol Rhythms. 2019:17, 417–422.	1	587
21.3167	7.13333	22.3667	7.76667	10.7	Australia	2	Xiao et al	2020	Xiao Q, Chaput JP, Olds T, Fogelholm M, Hu G, Lambert EV, Maher C, Maia J, Onywera V, Sarmiento OL, Standage M, Tremblay MS, Tudor-Locke C, Katzmarzyk PT; ISCOLE Research Group. Sleep characteristics and health-related quality of life in 9- to 11-year-old children from 12 countries. Sleep Health. 2020 Feb;6(1):4-14. doi: 10.1016/j.sleh.2019.09.006.	1	588
23.9833	7.28333	23.3333	8.61667	10.7	Brasil	2	Xiao et al	2020	Xiao Q, Chaput JP, Olds T, Fogelholm M, Hu G, Lambert EV, Maher C, Maia J, Onywera V, Sarmiento OL, Standage M, Tremblay MS, Tudor-Locke C, Katzmarzyk PT; ISCOLE Research Group. Sleep characteristics and health-related quality of life in 9- to 11-year-old children from 12 countries. Sleep Health. 2020 Feb;6(1):4-14. doi: 10.1016/j.sleh.2019.09.006.	1	589
21.05	7.05	22.2	7.58333	10.7	Canada	2	Xiao et al	2020	Xiao Q, Chaput JP, Olds T, Fogelholm M, Hu G, Lambert EV, Maher C, Maia J, Onywera V, Sarmiento OL, Standage M, Tremblay MS, Tudor-Locke C, Katzmarzyk PT; ISCOLE Research Group. Sleep characteristics and health-related quality of life in 9- to 11-year-old children from 12 countries. Sleep Health. 2020 Feb;6(1):4-14. doi: 10.1016/j.sleh.2019.09.006.	1	590
21.0167	6.46667	22.5667	7.58333	10.7	China	2	Xiao et al	2020	Xiao Q, Chaput JP, Olds T, Fogelholm M, Hu G, Lambert EV, Maher C, Maia J, Onywera V, Sarmiento OL, Standage M, Tremblay MS, Tudor-Locke C, Katzmarzyk PT; ISCOLE Research Group. Sleep characteristics and health-related quality of life in 9- to 11-year-old children from 12 countries. Sleep Health. 2020 Feb;6(1):4-14. doi: 10.1016/j.sleh.2019.09.006.	1	591
21.1833	6.11667	22.7333	7.81667	10.7	Colombia	2	Xiao et al	2020	Xiao Q, Chaput JP, Olds T, Fogelholm M, Hu G, Lambert EV, Maher C, Maia J, Onywera V, Sarmiento OL, Standage M, Tremblay MS, Tudor-Locke C, Katzmarzyk PT; ISCOLE Research Group. Sleep characteristics and health-related quality of life in 9- to 11-year-old children from 12 countries. Sleep Health. 2020 Feb;6(1):4-14. doi: 10.1016/j.sleh.2019.09.006.	1	592
21.1167	7.23333	22.3833	8.13333	10.7	England	2	Xiao et al	2020	Xiao Q, Chaput JP, Olds T, Fogelholm M, Hu G, Lambert EV, Maher C, Maia J, Onywera V, Sarmiento OL, Standage M, Tremblay MS, Tudor-Locke C, Katzmarzyk PT; ISCOLE Research Group. Sleep characteristics and health-related quality of life in 9- to 11-year-old children from 12 countries. Sleep Health. 2020 Feb;6(1):4-14. doi: 10.1016/j.sleh.2019.09.006.	1	593
21.4167	6.91667	23.7333	7.76667	10.7	Finland	2	Xiao et al	2020	Xiao Q, Chaput JP, Olds T, Fogelholm M, Hu G, Lambert EV, Maher C, Maia J, Onywera V, Sarmiento OL, Standage M, Tremblay MS, Tudor-Locke C, Katzmarzyk PT; ISCOLE Research Group. Sleep characteristics and health-related quality of life in 9- to 11-year-old children from 12 countries. Sleep Health. 2020 Feb;6(1):4-14. doi: 10.1016/j.sleh.2019.09.006.	1	594
22.4667	6.8	22.15	7.91667	10.7	India	2	Xiao et al	2020	Xiao Q, Chaput JP, Olds T, Fogelholm M, Hu G, Lambert EV, Maher C, Maia J, Onywera V, Sarmiento OL, Standage M, Tremblay MS, Tudor-Locke C, Katzmarzyk PT; ISCOLE Research Group. Sleep characteristics and health-related quality of life in 9- to 11-year-old children from 12 countries. Sleep Health. 2020 Feb;6(1):4-14. doi: 10.1016/j.sleh.2019.09.006.	1	595
21.3167	5.9	21.0167	7.2	10.7	Kenya	2	Xiao et al	2020	Xiao Q, Chaput JP, Olds T, Fogelholm M, Hu G, Lambert EV, Maher C, Maia J, Onywera V, Sarmiento OL, Standage M, Tremblay MS, Tudor-Locke C, Katzmarzyk PT; ISCOLE Research Group. Sleep characteristics and health-related quality of life in 9- to 11-year-old children from 12 countries. Sleep Health. 2020 Feb;6(1):4-14. doi: 10.1016/j.sleh.2019.09.006.	1	596
23.8833	7.16667	23.2167	8.3	10.7	Portugal	2	Xiao et al	2020	Xiao Q, Chaput JP, Olds T, Fogelholm M, Hu G, Lambert EV, Maher C, Maia J, Onywera V, Sarmiento OL, Standage M, Tremblay MS, Tudor-Locke C, Katzmarzyk PT; ISCOLE Research Group. Sleep characteristics and health-related quality of life in 9- to 11-year-old children from 12 countries. Sleep Health. 2020 Feb;6(1):4-14. doi: 10.1016/j.sleh.2019.09.006.	1	597
21.3333	6.63333	22.6667	7.7	10.7	South Africa	2	Xiao et al	2020	Xiao Q, Chaput JP, Olds T, Fogelholm M, Hu G, Lambert EV, Maher C, Maia J, Onywera V, Sarmiento OL, Standage M, Tremblay MS, Tudor-Locke C, Katzmarzyk PT; ISCOLE Research Group. Sleep characteristics and health-related quality of life in 9- to 11-year-old children from 12 countries. Sleep Health. 2020 Feb;6(1):4-14. doi: 10.1016/j.sleh.2019.09.006.	1	598
21.0667	6.63333	22.0667	7.91667	10.7	USA	2	Xiao et al	2020	Xiao Q, Chaput JP, Olds T, Fogelholm M, Hu G, Lambert EV, Maher C, Maia J, Onywera V, Sarmiento OL, Standage M, Tremblay MS, Tudor-Locke C, Katzmarzyk PT; ISCOLE Research Group. Sleep characteristics and health-related quality of life in 9- to 11-year-old children from 12 countries. Sleep Health. 2020 Feb;6(1):4-14. doi: 10.1016/j.sleh.2019.09.006.	1	599
23.2	6.7	25	9.4	16.5	Germany	0	Winnebeck et al	2020	Winnebeck EC, Vuori-Brodowski MT, Biller AM, Molenda C, Fischer D, Zerbini G, Roenneberg T. Later school start times in a flexible system improve teenage sleep. Sleep. 2020 Jun 15;43(6):zsz307. doi: 10.1093/sleep/zsz307.	1	600
24.3667	8.21667	24.5833	8.93333	22.1	Netherlands	0	Leenaars et al	2019	Leenaars CHC, Lucassen MFG, Borger N, Houben E, Kalsbeek A. Social Jet-Lag in Tertiary Students Following a Modern Curriculum with Few Time-Tabled Contact Hours: A Pilot Study. Clocks Sleep. 2019 Jul 8;1(3):306-318. doi: 10.3390/clockssleep1030026.	1	601
24.1405	7.5	23.887	8.16667	31.7	Korea	1	Kim & Suh	2019	Kim J, Suh S. Moderating Effect of Gender in the Relationship between Depression and Waketime Procrastination in Insomnia Patients. Sleep Medicine Research. 2019;10(2):90.	1	602
24.34	7.02667	24.9	9.43333	14.7	Korea	0	Chung et al	2020	Chung JH, Kim JB, Kim JH. Effects of sleep duration and weekend catch-up sleep on falling injury in adolescents: a population-based study. Sleep Med. 2020 Apr;68:138-145. doi: 10.1016/j.sleep.2019.12.005.	1	603
24	7.9	25.8333	11	16.2	Brasil	0	Ferrari Junior et al	2019	Ferrari Junior GJ, Barbosa DG, Andrade RD, Pelegrini A, Beltrame TS, Felden ÉPG. SUBJECTIVE SLEEP NEED AND DAYTIME SLEEPINESS IN ADOLESCENTS. Rev Paul Pediatr. 2019 Apr-Jun;37(2):209-216. doi: 10.1590/1984-0462/;2019;37;2;00014.	1	604
23.9	8.25	25.0833	9.86667	21.2	Norway	1	Saxvig et al	2019	Saxvig IW, Wilhelmsen-Langeland A, Pallesen S, Nordhus IH, Vedaa Ø, Bjorvatn B. Habitual Sleep, Social Jetlag, and Reaction Time in Youths With Delayed Sleep-Wake Phase Disorder. A Case-Control Study. Front Psychol. 2019 Nov 12;10:2569. doi: 10.3389/fpsyg.2019.02569.	1	605
21.4833	6.23333	22.5667	7.3	9.8	USA	2	Li et al	2020	Li A, Chen S, Quan SF, Silva GE, Ackerman C, Powers LS, Roveda JM, Perfect MM. Sleep patterns and sleep deprivation recorded by actigraphy in 4th-grade and 5th-grade students. Sleep Med. 2020 Mar;67:191-199. doi: 10.1016/j.sleep.2019.12.001.	1	606
23.7167	7.56667	23.8667	7.88333	16	World	2	Kuula et al	2019	Kuula L, Gradisar M, Martinmäki K, Richardson C, Bonnar D, Bartel K, Lang C, Leinonen L, Pesonen AK. Using big data to explore worldwide trends in objective sleep in the transition to adulthood. Sleep Med. 2019 Oct;62:69-76. doi: 10.1016/j.sleep.2019.07.024.	1	607
23.75	7.53333	24.0333	7.86667	17	World	2	Kuula et al	2019	Kuula L, Gradisar M, Martinmäki K, Richardson C, Bonnar D, Bartel K, Lang C, Leinonen L, Pesonen AK. Using big data to explore worldwide trends in objective sleep in the transition to adulthood. Sleep Med. 2019 Oct;62:69-76. doi: 10.1016/j.sleep.2019.07.024.	1	608
24	7.63333	24.2167	7.96667	18	World	2	Kuula et al	2019	Kuula L, Gradisar M, Martinmäki K, Richardson C, Bonnar D, Bartel K, Lang C, Leinonen L, Pesonen AK. Using big data to explore worldwide trends in objective sleep in the transition to adulthood. Sleep Med. 2019 Oct;62:69-76. doi: 10.1016/j.sleep.2019.07.024.	1	609
24.1167	7.8	24.25	8.06667	19	World	2	Kuula et al	2019	Kuula L, Gradisar M, Martinmäki K, Richardson C, Bonnar D, Bartel K, Lang C, Leinonen L, Pesonen AK. Using big data to explore worldwide trends in objective sleep in the transition to adulthood. Sleep Med. 2019 Oct;62:69-76. doi: 10.1016/j.sleep.2019.07.024.	1	610
24.0167	7.61667	24.2333	7.91667	20	World	2	Kuula et al	2019	Kuula L, Gradisar M, Martinmäki K, Richardson C, Bonnar D, Bartel K, Lang C, Leinonen L, Pesonen AK. Using big data to explore worldwide trends in objective sleep in the transition to adulthood. Sleep Med. 2019 Oct;62:69-76. doi: 10.1016/j.sleep.2019.07.024.	1	611
24.1167	7.78333	24.2667	7.95	21	World	2	Kuula et al	2019	Kuula L, Gradisar M, Martinmäki K, Richardson C, Bonnar D, Bartel K, Lang C, Leinonen L, Pesonen AK. Using big data to explore worldwide trends in objective sleep in the transition to adulthood. Sleep Med. 2019 Oct;62:69-76. doi: 10.1016/j.sleep.2019.07.024.	1	612
24.2	7.81667	24.3333	8.1	22	World	2	Kuula et al	2019	Kuula L, Gradisar M, Martinmäki K, Richardson C, Bonnar D, Bartel K, Lang C, Leinonen L, Pesonen AK. Using big data to explore worldwide trends in objective sleep in the transition to adulthood. Sleep Med. 2019 Oct;62:69-76. doi: 10.1016/j.sleep.2019.07.024.	1	613
24.1333	7.8	24.3	8.06667	23	World	2	Kuula et al	2019	Kuula L, Gradisar M, Martinmäki K, Richardson C, Bonnar D, Bartel K, Lang C, Leinonen L, Pesonen AK. Using big data to explore worldwide trends in objective sleep in the transition to adulthood. Sleep Med. 2019 Oct;62:69-76. doi: 10.1016/j.sleep.2019.07.024.	1	614
24	7.51667	24.2	7.78333	24	World	2	Kuula et al	2019	Kuula L, Gradisar M, Martinmäki K, Richardson C, Bonnar D, Bartel K, Lang C, Leinonen L, Pesonen AK. Using big data to explore worldwide trends in objective sleep in the transition to adulthood. Sleep Med. 2019 Oct;62:69-76. doi: 10.1016/j.sleep.2019.07.024.	1	615
24.0167	7.53333	24.2167	7.8	25	World	2	Kuula et al	2019	Kuula L, Gradisar M, Martinmäki K, Richardson C, Bonnar D, Bartel K, Lang C, Leinonen L, Pesonen AK. Using big data to explore worldwide trends in objective sleep in the transition to adulthood. Sleep Med. 2019 Oct;62:69-76. doi: 10.1016/j.sleep.2019.07.024.	1	616
24	7.46667	24.1833	7.76667	26	World	2	Kuula et al	2019	Kuula L, Gradisar M, Martinmäki K, Richardson C, Bonnar D, Bartel K, Lang C, Leinonen L, Pesonen AK. Using big data to explore worldwide trends in objective sleep in the transition to adulthood. Sleep Med. 2019 Oct;62:69-76. doi: 10.1016/j.sleep.2019.07.024.	1	617
23.8667	7.41667	24.15	7.73333	27	World	2	Kuula et al	2019	Kuula L, Gradisar M, Martinmäki K, Richardson C, Bonnar D, Bartel K, Lang C, Leinonen L, Pesonen AK. Using big data to explore worldwide trends in objective sleep in the transition to adulthood. Sleep Med. 2019 Oct;62:69-76. doi: 10.1016/j.sleep.2019.07.024.	1	618
23.75	7.33333	23.9833	7.66667	28	World	2	Kuula et al	2019	Kuula L, Gradisar M, Martinmäki K, Richardson C, Bonnar D, Bartel K, Lang C, Leinonen L, Pesonen AK. Using big data to explore worldwide trends in objective sleep in the transition to adulthood. Sleep Med. 2019 Oct;62:69-76. doi: 10.1016/j.sleep.2019.07.024.	1	619
23.7167	7.31667	23.95	7.55	29	World	2	Kuula et al	2019	Kuula L, Gradisar M, Martinmäki K, Richardson C, Bonnar D, Bartel K, Lang C, Leinonen L, Pesonen AK. Using big data to explore worldwide trends in objective sleep in the transition to adulthood. Sleep Med. 2019 Oct;62:69-76. doi: 10.1016/j.sleep.2019.07.024.	1	620
23.7167	7.3	23.9667	7.5	30	World	2	Kuula et al	2019	Kuula L, Gradisar M, Martinmäki K, Richardson C, Bonnar D, Bartel K, Lang C, Leinonen L, Pesonen AK. Using big data to explore worldwide trends in objective sleep in the transition to adulthood. Sleep Med. 2019 Oct;62:69-76. doi: 10.1016/j.sleep.2019.07.024.	1	621
21.7889	6.97778	22.5	8.88889	9.3	China	0	Yeung et al	2019	Yeung WF, Yu BY, Ho YS, Ho FYY, Chung KF, Lee RLT, Wong C, Lam MY. Validation of the Chinese Version of the Children's ChronoType Questionnaire (CCTQ) in school-aged children. Chronobiol Int. 2019 Dec;36(12):1681-1690. doi: 10.1080/07420528.2019.1673769.	1	622
23.65	6.73333	25.3333	9.55	27.8	Mexico	0	Arrona-Palacios et al	2020	Arrona-Palacios A, Díaz-Morales JF, Adan A, Randler C. Sleep habits, circadian preferences and substance use in a Mexican population: the use of the Morningness-Eveningness-Stability-Scale improved (MESSi). Chronobiol Int. 2020 Jan;37(1):111-122. doi: 10.1080/07420528.2019.1688339.	1	623
23.5	6.3	24.3	8.5	16.1	USA	2	Dunster et al	2018	Dunster GP, de la Iglesia L, Ben-Hamo M, Nave C, Fleischer JG, Panda S, de la Iglesia HO. Sleepmore in Seattle: Later school start times are associated with more sleep and better performance in high school students. Sci Adv. 2018 Dec 12;4(12):eaau6200. doi: 10.1126/sciadv.aau6200.	1	624
25.1833	8.34167	26.3583	9.44167	22	Brasil	2	Wendt et al	2020	Wendt A, da Silva ICM, Gonçalves H, Assunção MCF, Menezes AMB, Wehrmeister FC. Sleep parameters measured by accelerometry: descriptive analyses from the 22-year follow-up of the Pelotas 1993 birth cohort. Sleep Med. 2020 Mar;67:83-90. doi: 10.1016/j.sleep.2019.10.020.	1	625
23.85	7.61667	24.9	9.86667	21.5	Spain	0	Zerón-Rugerio et al	2019	Zerón-Rugerio MF, Cambras T, Izquierdo-Pulido M. Social Jet Lag Associates Negatively with the Adherence to the Mediterranean Diet and Body Mass Index among Young Adults. Nutrients. 2019 Jul 30;11(8):1756. doi: 10.3390/nu11081756.	1	626
24.4333	7.86667	25.25	10.15	20	Lithuania	0	Jokubauskas et al	2019	Jokubauskas L, Baltrušaitytė A, Pileičikienė G, Žekonis G. Interrelationships between distinct circadian manifestations of possible bruxism, perceived stress, chronotype and social jetlag in a population of undergraduate students. Chronobiol Int. 2019 Nov;36(11):1558-1569. doi: 10.1080/07420528.2019.1660356.	1	627
24.3667	7.3	25.0667	9.53333	25	Lithuania	0	Jokubauskas et al	2019	Jokubauskas L, Baltrušaitytė A, Pileičikienė G, Žekonis G. Interrelationships between distinct circadian manifestations of possible bruxism, perceived stress, chronotype and social jetlag in a population of undergraduate students. Chronobiol Int. 2019 Nov;36(11):1558-1569. doi: 10.1080/07420528.2019.1660356.	1	628
22.5333	5.9	23.65	9.55	13.5	USA	0	Owens et al	2017	Owens JA, Dearth-Wesley T, Herman AN, Oakes JM, Whitaker RC. A quasi-experimental study of the impact of school start time changes on adolescent sleep. Sleep Health. 2017 Dec;3(6):437-443. doi: 10.1016/j.sleh.2017.09.001.	1	629
22.17	6.23	23.425	8.855	13	Brasil	0	Carissimi et al	2016	Carissimi A, Dresch F, Martins AC, Levandovski RM, Adan A, Natale V, Martoni M, Hidalgo MP. The influence of school time on sleep patterns of children and adolescents. Sleep Med. 2016 Mar;19:33-9. doi: 10.1016/j.sleep.2015.09.024.	1	630
22.3667	6.33333	24.5333	9.73333	15.6	USA	0	Mathew et al	2019	Mathew GM, Li X, Hale L, Chang AM. Sleep duration and social jetlag are independently associated with anxious symptoms in adolescents. Chronobiol Int. 2019 Apr;36(4):461-469. doi: 10.1080/07420528.2018.1509079.	1	631
24.3667	7.1	25.2	10.1167	19.4	Russia	0	Borisenkov et al	2022	Borisenkov Mikhail F. , Sergey V. Popov, Vasily V. Smirnov, Denis G. Gubin, Ivan M. Petrov, Tatyana N. Vasilkova, Svetlana V. Solovieva, Ekaterina A. Martinson, Anna A. Pechеrkina, Olga I. Dorogina & Elvira E. Symaniuk (2022) Associations among sleep-wake rhythm characteristics, time perspective and psycho-emotional state during COVID-19 isolation, Biological Rhythm Research, DOI: 10.1080/0929101…	1	632
23.045	7.245	24.735	10.065	17.7	USA	0	Gradisar et al	2008	Gradisar, M., Robinson, J., Wright, H.,Paine, S., Gamble, A. Adolescent napping behavior: Comparisons of school week versus weekend sleep patterns. Sleep and Biological RhythmsVolume 6(3), July 2008, 183-186.	1	633
22.3167	7.75	23.1333	9.6	15.5	USA	0	Gershon et al	2018	Gershon A, Johnson SL, Thomas L, Singh MK. Double trouble: Weekend sleep changes are associated with increased impulsivity among adolescents with bipolar I disorder. Bipolar Disord. 2019 Mar;21(2):132-141. doi: 10.1111/bdi.12658.	1	634
23.5333	6.28333	24.25	9.26667	16	Singapore	0	Yeo et al	2019	Yeo SC, Jos AM, Erwin C, Lee SM, Lee XK, Lo JC, Chee MWL, Gooley JJ. Associations of sleep duration on school nights with self-rated health, overweight, and depression symptoms in adolescents: problems and possible solutions. Sleep Med. 2019 Aug;60:96-108. doi: 10.1016/j.sleep.2018.10.041.	1	635
24	7.1	25.1	8.5	15.7	Australia	2	Blunden et al	2019	Blunden S, Magee C, Clarkson L, Searle A, Banks S, Olds T. Interindividual and intraindividual variability in adolescent sleep patterns across an entire school term: A pilot study. Sleep Health. 2019 Dec;5(6):546-554. doi: 10.1016/j.sleh.2019.08.002.	1	636
23.1583	7.85833	25.425	10.075	24.8	Germany	0	Faßl et al	2019	Faßl C, Quante M, Mariani S, Randler C. Preliminary findings for the validity of the Morningness-Eveningness-Stability Scale improved (MESSi): Correlations with activity levels and personality. Chronobiol Int. 2019 Jan;36(1):135-142. doi: 10.1080/07420528.2018.1519570.	1	637
23.0133	6.20167	23.27	7.97	28.4	India	0	Singh et al	2019	Singh M, Singh A, Sachdev S, Sleep wake pattern, daytime sleepiness and sleep quality in postgraduate students and demonstrators in medical non-clinical field. IP Indian J Neurosci 2019;5(3):155-159	1	638
24.55	8.81667	25.1167	9.88333	18.9	UK	1	Shochat et al	2019	Shochat T, Santhi N, Herer P, Flavell SA, Skeldon AC, Dijk DJ. Sleep Timing in Late Autumn and Late Spring Associates With Light Exposure Rather Than Sun Time in College Students. Front Neurosci. 2019 Aug 28;13:882. doi: 10.3389/fnins.2019.00882.	1	639
23.7389	7.20556	23.8722	8.46667	20	Brasil	1	Duarte & Menna-Barreto	2021	Duarte LL & Menna-Barreto L Chronotypes and circadian rhythms in university students, Biological Rhythm Research, 2021: DOI: 10.1080/09291016.2021.1903791	1	640
24	7	26.8	11	15.1	Argentina	0	Calderón et al.	2021	Calderón AH et al. Sleep quality, chronotype and social jet lag of adolescents from a population with a very late chronotype. arXiv:2103.10795v1	1	641
24	7	26.8	11	16.1	Argentina	0	Calderón et al.	2021	Calderón AH et al. Sleep quality, chronotype and social jet lag of adolescents from a population with a very late chronotype. arXiv:2103.10795v1	1	642
25	7.2	27.1	12	17	Argentina	0	Calderón et al.	2021	Calderón AH et al. Sleep quality, chronotype and social jet lag of adolescents from a population with a very late chronotype. arXiv:2103.10795v1	1	643
25.3	9.2	27.2	11.5	21	Argentina	0	Calderón et al.	2021	Calderón AH et al. Sleep quality, chronotype and social jet lag of adolescents from a population with a very late chronotype. arXiv:2103.10795v1	1	644
24.3	7.4	25	9	37	Argentina	0	Calderón et al.	2021	Calderón AH et al. Sleep quality, chronotype and social jet lag of adolescents from a population with a very late chronotype. arXiv:2103.10795v1	1	645
22.7667	6.71667	23.4167	7.9	50	Germany	0	Randler et al	2021	Randler C, Eberhard K, Staller N, Tryjanowski P.Negative social jetlag – special consideration of leisure activities and evidence from birdwatchers. J Sleep Res 2021	1	646
23.654	6.404	24.4	7.515	24	USA	2	Rezaei & Grandner	2021	Rezaei N, Grandner MA. Changes in Sleep Duration, Timing, and Variability during the COVID-19 Pandemic: Large-Scale Fitbit Data from 6 Major U.S. Cities. Sleep Health 2021	1	647
23.26	5.802	23.89	6.915	39.5	USA	2	Rezaei & Grandner	2021	Rezaei N, Grandner MA. Changes in Sleep Duration, Timing, and Variability during the COVID-19 Pandemic: Large-Scale Fitbit Data from 6 Major U.S. Cities. Sleep Health 2021	1	648
23.174	5.6	23.625	6.5	57.5	USA	2	Rezaei & Grandner	2021	Rezaei N, Grandner MA. Changes in Sleep Duration, Timing, and Variability during the COVID-19 Pandemic: Large-Scale Fitbit Data from 6 Major U.S. Cities. Sleep Health 2021	1	649
23.41	5.928	23.58	6.325	70	USA	2	Rezaei & Grandner	2021	Rezaei N, Grandner MA. Changes in Sleep Duration, Timing, and Variability during the COVID-19 Pandemic: Large-Scale Fitbit Data from 6 Major U.S. Cities. Sleep Health 2021	1	650
24.5833	7.21667	25.8	9.55	38	Argentina	0	Leone et al	2020	Leone MJ, Sigman M, Golombek DA. Effects of lockdown on human sleep and chronotype during the COVID-19 pandemic. Curr Biol. 2020 Aug 17;30(16):R930-R931.	1	651
22.7333	6.58333	23.65	9.23333	16.3	USA	0	Becker et al	2021	Becker SP, Dvorsky MR, Breaux R, Cusick CN, Taylor KP, Langberg JM. Prospective Examination of Adolescent Sleep Patterns and Behaviors Before and During COVID-19. Sleep. 2021 Feb 25:zsab054. doi: 10.1093/sleep/zsab054.	1	652
22.6167	6.35	23.35	7.95	36.5	Sweden	0	Benedict et al	2021	Benedict C, Brandão LEM, Merikanto I, Partinen M, Bjorvatn B, Cedernaes J. Meal and Sleep Timing before and during the COVID-19 Pandemic: A Cross-Sectional Anonymous Survey Study from Sweden. Clocks Sleep. 2021 Apr 22;3(2):251-258.	1	653
22.7	6.25	23.2333	7.5	57.4	Sweden	0	Benedict et al	2021	Benedict C, Brandão LEM, Merikanto I, Partinen M, Bjorvatn B, Cedernaes J. Meal and Sleep Timing before and during the COVID-19 Pandemic: A Cross-Sectional Anonymous Survey Study from Sweden. Clocks Sleep. 2021 Apr 22;3(2):251-258.	1	654
21.7333	6.61667	22.8167	9.2	13	Canada	0	Ramos Socarras et al	2021	Ramos Socarras L, Potvin J, Forest G. COVID-19 and sleep patterns in adolescents and young adults. Sleep Med. 2021 Apr 15;83:26-33.	1	655
22.35	6.8	23.5333	9.46667	16	Canada	0	Ramos Socarras et al	2021	Ramos Socarras L, Potvin J, Forest G. COVID-19 and sleep patterns in adolescents and young adults. Sleep Med. 2021 Apr 15;83:26-33.	1	656
22.65	7.28333	23.8167	9.45	19.5	Canada	0	Ramos Socarras et al	2021	Ramos Socarras L, Potvin J, Forest G. COVID-19 and sleep patterns in adolescents and young adults. Sleep Med. 2021 Apr 15;83:26-33.	1	657
22.7667	7.48333	23.7333	9.33333	23.5	Canada	0	Ramos Socarras et al	2021	Ramos Socarras L, Potvin J, Forest G. COVID-19 and sleep patterns in adolescents and young adults. Sleep Med. 2021 Apr 15;83:26-33.	1	658
23.97	7.68	24.37	8.71	22.4	China	0	Dai et al	2021	Dai W, Zhou J, Li G, Zhang B, Ma N. Maintaining normal sleep patterns, lifestyles and emotion during the COVID-19 pandemic: The stabilizing effect of daytime napping. J Sleep Res. 2021 Jan 8:e13259.	1	659
24.25	7.16667	24.9167	8.41667	30.9	Singapore	0	Ong et al	2021	Ong JL, Lau T, Massar SAA, Chong ZT, Ng BKL, Koek D, Zhao W, Yeo BTT, Cheong K, Chee MWL. COVID-19-related mobility reduction: heterogenous effects on sleep and physical activity rhythms. Sleep. 2021 Feb 12;44(2):zsaa179.	1	660
24.15	8.05	24.9	9.3	22.2	USA	0	Wright et al	2020	Wright KP Jr, Linton SK, Withrow D, Casiraghi L, Lanza SM, Iglesia H, Vetter C, Depner CM. Sleep in university students prior to and during COVID-19 Stay-at-Home orders. Curr Biol. 2020 Jul 20;30(14):R797-R798.	1	661
22.9	6.4	23.95	8.25	30	Switzerland	0	Blume et al	2020	Blume C, Schmidt MH, Cajochen C. Effects of the COVID-19 lockdown on human sleep and rest-activity rhythms. Curr Biol. 2020 Jul 20;30(14):R795-R797.	1	662
20.5333	7.06667	21.1667	7.7	4	USA	0	Meltzer et al	2021	Meltzer LJ, Wahlstrom KL, Plog AE, Strand MJ. Changing school start times: impact on sleep in primary and secondary school students. Sleep. 2021 Apr 15:zsab048.	1	663
21.2167	7.08333	22.35	8.55	8	USA	0	Meltzer et al	2021	Meltzer LJ, Wahlstrom KL, Plog AE, Strand MJ. Changing school start times: impact on sleep in primary and secondary school students. Sleep. 2021 Apr 15:zsab048.	1	664
21.8167	6.45	23.3667	9.2	12.5	USA	0	Meltzer et al	2021	Meltzer LJ, Wahlstrom KL, Plog AE, Strand MJ. Changing school start times: impact on sleep in primary and secondary school students. Sleep. 2021 Apr 15:zsab048.	1	665
22.3833	5.76667	23.7833	9.26667	16	USA	0	Meltzer et al	2021	Meltzer LJ, Wahlstrom KL, Plog AE, Strand MJ. Changing school start times: impact on sleep in primary and secondary school students. Sleep. 2021 Apr 15:zsab048.	1	666
22.0167	6.11667	23.5833	9.38333	10.8	Mexico	0	Arrona-Palacios et al	2021	Arrona-Palacios A, Díaz-Morales JF, Adan A. Sleep habits and circadian preferences in school-aged children attending a Mexican double-shift school system. Sleep Med. 2021 May;81:116-119.	1	667
23.7333	7.81667	25.05	9.18333	23.5	USA	2	Brooks et al	2021	Brooks C, Shaafi Kabiri N, Bhangu J, Cai X, Pickering E, Erb MK, Auerbach S, Bonato P, Moore TL, Mortazavi F, Thomas K. The impact of chronotype on circadian rest-activity rhythm and sleep characteristics across the week. Chronobiol Int. 2021 Jun 16:1-16. doi: 10.1080/07420528.2021.1937197.	1	668
22.5833	6.48333	23.8833	9.88333	16.09	Switzerland	0	Werner et al	2021	Werner H, Albrecht JN, Widmer N, Janisch D, Huber R, Jenni OG. Adolescents' preference for later school start times. J Sleep Res. 2021 Jun 13:e13401. doi: 10.1111/jsr.13401.	1	669
22.3167	7.23333	23.775	9.53333	15.75	New Zealand	0	Higgins et al	2020	Higgins S, Stoner L, Lubransky A, Howe AS, Wong JE, Black K, Skidmore P.. Sleep Med. 2020 Nov;75:163-170. doi: 10.1016/j.sleep.2020.07.030.	1	670
25	7.66667	26	10.5	21.58	Turkey	0	Bodur et al	2021	Bodur M, Baspinar B, Özçelik AÖ. A cross-sectional evaluation of the relationship between social jetlag and diet quality. Chronobiol Int. 2021 Jun 8:1-12. doi: 10.1080/07420528.2021.1935990.	1	671
22.55	6.86667	24.55	11.1333	16.5	Norway	0	Saxvig et al	2021	Saxvig IW, Bjorvatn B, Hysing M, Sivertsen B, Gradisar M, Pallesen S. Sleep in older adolescents. Results from a large cross-sectional, population-based study. J Sleep Res. 2021 Aug;30(4):e13263. doi: 10.1111/jsr.13263.	1	672
24.425	7.875	25.8417	10.9583	16.4	Australia	1	Lang et al	2021	Lang, C., Richardson, C., Short, M., & Gradisar, M. (2021, July 21). Low-Intensity Scheduled Morning Exercise for Adolescents with a Late Chronotype: A Novel Treatment to Improve Sleep Health. https://doi.org/10.31234/osf.io/q2gra	1	673
22.2167	7.43333	22.3167	7.78333	15.9	Australia	1	Richardson & Gradisar	2021	Richardson C, Gradisar M. Depressed mood and repetitive negative thinking in Delayed Sleep-Wake Phase Disorder: Treatment effects and a comparison with good sleepers. J Sleep Res. 2021 Aug 4:e13452. doi: 10.1111/jsr.13452.	1	674
23.5	6.75	24.5	9.75	15.8	Germany	1	Biller et al	2021	Biller Anna M., Carmen Molenda, Giulia Zerbini, Till Roenneberg, Eva C. Winnebeck.One year later: longitudinal effects of flexible school start times on teenage sleep and subjective psychological outcomes.bioRxiv 2021.07.27.453940; doi: https://doi.org/10.1101/2021.07.27.453940	1	675
21.6083	6.79167	21.8167	6.95833	10.23	New Zealand	0	Higgins et al	2021	Higgins S, Stoner L, Black K, Wong JE, Quigg R, Meredith-Jones K, Skidmore PM. Social jetlag is associated with obesity-related outcomes in 9-11-year-old children, independent of other sleep characteristics. Sleep Med. 2021 Aug;84:294-302. doi: 10.1016/j.sleep.2021.06.014.	1	676
25.0667	8.18333	25.65	9.93333	20.6	Singapore	0	Yeo et al	2021	Yeo Sing Chen, Jacinda Tan, Clin K.Y. Lai, Samantha Lim, Yuvan Chandramoghan, Fun Man Fung, Patricia Chen, Timothy J. Strauman, Joshua J. Gooley.University-wide chronotyping shows late-type students have lower grades, shorter sleep, poorer well-being, lower self-regulation, and more absenteeism. bioRxiv 2021.08.04.455177; doi: https://doi.org/10.1101/2021.08.04.455177	1	677
25.8	8.18333	26.0333	9.08333	20.6	Singapore	2	Yeo et al	2021	Yeo Sing Chen, Jacinda Tan, Clin K.Y. Lai, Samantha Lim, Yuvan Chandramoghan, Fun Man Fung, Patricia Chen, Timothy J. Strauman, Joshua J. Gooley.University-wide chronotyping shows late-type students have lower grades, shorter sleep, poorer well-being, lower self-regulation, and more absenteeism. bioRxiv 2021.08.04.455177; doi: https://doi.org/10.1101/2021.08.04.455177	1	678
24.0333	7.71667	24.5667	8.65	30.7	USA	0	Yang et al	2021	Yang PL, Burr RL, de la Iglesia HO, Buchanan DT, Ward TM, Landis CA, Heitkemper MM. Associations between chronotype, social jetlag, and weekday sleep in women with irritable bowel syndrome. Chronobiol Int. 2021 May;38(5):742-752. doi: 10.1080/07420528.2021.1885430.	1	679
23.9	6.98333	24.6167	10.1333	13.8	China	0	Chen et al	2021	Chen SJ, Zhang JH, Li SX, Tsang CC, Chan KCC, Au CT, Li AM, Kong APS, Wing YK, Chan NY. The trajectories and associations of eveningness and insomnia with daytime sleepiness, depression and suicidal ideation in adolescents: A 3-year longitudinal study. J Affect Disord. 2021 Jul 19;294:533-542. doi: 10.1016/j.jad.2021.07.033.	1	680
23.8	7.05	25.1667	10.0333	15.7	Turkey	0	Uslu et al	2021	Uslu E, Özsaban A, Çağan Ö. Social Jetlag in adolescents: From a nursing perspective. J Child Adolesc Psychiatr Nurs. 2021 May 30. doi: 10.1111/jcap.12332.	1	681
23.2167	6.73333	24.2	9.8	14.8	China	0	Chan et al	2020	Chan NY, Zhang J, Tsang CC, Li AM, Chan JWY, Wing YK, Li SX. The associations of insomnia symptoms and chronotype with daytime sleepiness, mood symptoms and suicide risk in adolescents. Sleep Med. 2020 Oct;74:124-131. doi: 10.1016/j.sleep.2020.05.035.	1	682
22.4333	6.93333	23.1333	8.25	15.4	USA	2	Bowen et al	2021	Bowen AE, Staggs S, Kaar J, Nokoff N, Simon SL. Short sleep, insomnia symptoms, and evening chronotype are correlated with poorer mood and quality of life in adolescent transgender males. Sleep Health. 2021 Apr 16:S2352-7218(21)00065-6. doi: 10.1016/j.sleh.2021.03.008.	1	683
23.2333	7.7	24.6333	9.81667	22.9	Norway	0	Sivertsen et al	2021	Sivertsen B, Harvey AG, Gradisar M, Pallesen S, Hysing M. Delayed sleep-wake phase disorder in young adults: prevalence and correlates from a national survey of Norwegian university students. Sleep Med. 2021 Jan;77:184-191. doi: 10.1016/j.sleep.2020.09.028.	1	684
22.1333	6.83333	22.7167	7.91667	12.7	Australia	0	Stone et al	2021	Stone JE, Phillips AJK, Chachos E, Hand AJ, Lu S, Carskadon MA, Klerman EB, Lockley SW, Wiley JF, Bei B, Rajaratnam SMW; CLASS Study Team. In-person vs home schooling during the COVID-19 pandemic: Differences in sleep, circadian timing, and mood in early adolescence. J Pineal Res. 2021 Jul 17:e12757. doi: 10.1111/jpi.12757.	1	685
22.5167	6.31667	24	9.48333	8.9	USA	0	Meltzer et al	2021	Meltzer LJ, Saletin JM, Honaker SM, Owens JA, Seixas A, Wahlstrom KL, Wolfson AR, Wong P, Carskadon MA. COVID-19 instructional approaches (in-person, online, hybrid), school start times, and sleep in over 5,000 U.S. adolescents. Sleep. 2021 Aug 17:zsab180. doi: 10.1093/sleep/zsab180.	1	686
22.95	6.33333	24.4333	9.65	16.1	USA	0	Meltzer et al	2021	Meltzer LJ, Saletin JM, Honaker SM, Owens JA, Seixas A, Wahlstrom KL, Wolfson AR, Wong P, Carskadon MA. COVID-19 instructional approaches (in-person, online, hybrid), school start times, and sleep in over 5,000 U.S. adolescents. Sleep. 2021 Aug 17:zsab180. doi: 10.1093/sleep/zsab180.	1	687
24.7844	6.90824	25.0588	8.27733	38.8	Finland	0	Merikanto et al	2021	Merikanto I, Kortesoja L, Benedict C, Chung F, Cedernaes J, Espie CA, Morin CM, Dauvilliers Y, Partinen M, De Gennaro L, Wing YK, Chan NY, Inoue Y, Matsui K, Holzinger B, Plazzi G, Mota-Rolim SA, Leger D, Penzel T, Bjorvatn B. Evening-types show highest increase of sleep and mental health problems during the COVID-19 pandemic - Multinational study on 19,267 adults. Sleep. 2021 Aug 25:zsab216. doi…	1	688
21.35	7.15	21.85	7.35	8.1	Finland	0	Kuula et al	2018	Kuula L, Pesonen AK, Merikanto I, Gradisar M, Lahti J, Heinonen K, Kajantie E, Räikkönen K. Development of Late Circadian Preference: Sleep Timing From Childhood to Late Adolescence. J Pediatr. 2018 Mar;194:182-189.e1. doi: 10.1016/j.jpeds.2017.10.068.	1	689
22.325	7.25	22.9	8.55	12.3	Finland	0	Kuula et al	2018	Kuula L, Pesonen AK, Merikanto I, Gradisar M, Lahti J, Heinonen K, Kajantie E, Räikkönen K. Development of Late Circadian Preference: Sleep Timing From Childhood to Late Adolescence. J Pediatr. 2018 Mar;194:182-189.e1. doi: 10.1016/j.jpeds.2017.10.068.	1	690
23.5	7.675	24.75	9.1	16.9	Finland	0	Kuula et al	2018	Kuula L, Pesonen AK, Merikanto I, Gradisar M, Lahti J, Heinonen K, Kajantie E, Räikkönen K. Development of Late Circadian Preference: Sleep Timing From Childhood to Late Adolescence. J Pediatr. 2018 Mar;194:182-189.e1. doi: 10.1016/j.jpeds.2017.10.068.	1	691
24.0333	6.89167	24.5583	9.85833	15.1	Korea	0	Chung et al	2021	Chung JS, Choi E, Lee AR, Kim SY, Lee K, Kim BN, Park S, Jung KI, Lee SY, Park MH. The difference in sleep, depression, anxiety, and Internet addiction between Korean adolescents with different circadian preference. Indian J Psychiatry. 2020 Sep-Oct;62(5):524-530. doi: 10.4103/psychiatry.IndianJPsychiatry_254_19.	1	692
22.4833	6.25	23.6667	8.88333	15.2	USA	2	Berry et al	2021	Berry K.M., Aaron T. Berger, Melissa N. Laska, Darin J. Erickson, Kathleen M. Lenk, Conrad Iber, Kelsie M. Full, Kyla Wahlstrom, Susan Redline, Rachel Widome, Weekend night vs. school night sleep patterns, weight status, and weight-related behaviors among adolescents, Sleep Health, 2021,	1	693
23.5	6.5	24.3	8.5	16.2	USA	2	Dunster et al	2018	Dunster GP, de la Iglesia L, Ben-Hamo M, Nave C, Fleischer JG, Panda S, de la Iglesia HO. Sleepmore in Seattle: Later school start times are associated with more sleep and better performance in high school students. Sci Adv. 2018 Dec 12;4(12):eaau6200. doi: 10.1126/sciadv.aau6200.	1	694
25.15	8.01667	25.6167	9.58333	21.5	Japan	0	Higuchi et al	2021	Higuchi S, Lin Y, Qiu J, Zhang Y, Ohashi M, Lee SI, Kitamura S, Yasukouchi A. Is the use of high correlated color temperature light at night related to delay of sleep timing in university students? A cross-country study in Japan and China. J Physiol Anthropol. 2021 Jun 8;40(1):7. doi: 10.1186/s40101-021-00257-x.	1	695
23.9667	7.7	24.3667	8.76667	23.3	China	0	Higuchi et al	2021	Higuchi S, Lin Y, Qiu J, Zhang Y, Ohashi M, Lee SI, Kitamura S, Yasukouchi A. Is the use of high correlated color temperature light at night related to delay of sleep timing in university students? A cross-country study in Japan and China. J Physiol Anthropol. 2021 Jun 8;40(1):7. doi: 10.1186/s40101-021-00257-x.	1	696
23.5333	6.13333	23.7833	7.43333	41.4	Japan	0	Adachi et al	2021	Adachi H, Yamamoto R, Fujino R, Kanayama D, Sakagami Y, Akamine S, Marutani N, Yanagida K, Mamiya Y, Koyama M, Shigedo Y, Sugita Y, Mashita M, Nakano N, Watanabe K, Ikeda M, Kudo T. Association of weekday-to-weekend sleep differences and stress response among a Japanese working population: a cross-sectional study. Sleep Med. 2021 Jun;82:159-164. doi: 10.1016/j.sleep.2021.04.006.	1	697
24.93	7.02	25.49	9.24	36.4	Japan	0	Takaesu et al	2021	Takaesu Y, Shimura A, Komada Y, Futenma K, Ishii M, Sugiura K, Watanabe K, Inoue Y. Association of sleep duration on workdays or free days and social jetlag with job stress. Psychiatry Clin Neurosci. 2021 Aug;75(8):244-249. doi: 10.1111/pcn.13274.	1	698
23.5	6.1	24.5	9	15.8	Brasil	0	de Oliveira et al	2020	de Oliveira, M.L.C., de Nogueira Holanda, F.W., Valdez, P., de Almondes, K.M. and de Azevedo, C.V.M. (2020), Impact of Electronic Device Usage Before Bedtime on Sleep and Attention in Adolescents. Mind, Brain, and Education, 14: 376-386.	1	699
24.5125	8.07083	24.7292	8.7875	22.3	Netherlands	1	Leenaars et al	2019	Leenaars CHC, Lucassen MFG, Borger N, Houben E, Kalsbeek A. Social Jet-Lag in Tertiary Students Following a Modern Curriculum with Few Time-Tabled Contact Hours: A Pilot Study. Clocks Sleep. 2019 Jul 8;1(3):306-318. doi: 10.3390/clockssleep1030026.	1	700
22.2667	6.88333	22.8833	7.23333	13.2	Australia	2	Agostini et al	2018	Agostini A, Pignata S, Camporeale R, Scott K, Dorrian J, Way A, Ryan P, Martin J, Kennedy D, Lushington K. Changes in growth and sleep across school nights, weekends and a winter holiday period in two Australian schools. Chronobiol Int. 2018 May;35(5):691-704. doi: 10.1080/07420528.2018.1430037.	1	701
23.9	7.05833	24.6	8.425	31.45	Korea	0	Lee et al	2014	Lee JH, Kim SJ, Lee SY, Jang KH, Kim IS, Duffy JF. Reliability and validity of the Korean version of Morningness-Eveningness Questionnaire in adults aged 20-39 years. Chronobiol Int. 2014 May;31(4):479-86. doi: 10.3109/07420528.2013.867864.	1	702
21	6.75	21.4167	7.5	5	Japan	0	Doi et al	2014	Doi Y, Ishihara K, Uchiyama M. Sleep/wake patterns and circadian typology in preschool children based on standardized parental self-reports. Chronobiol Int. 2014 Apr;31(3):328-36. doi: 10.3109/07420528.2013.852103.	1	703
22.6167	6.98333	23.7833	9.35	14.7	Brasil	0	de Souza & Hidalgo	2014	de Souza CM, Hidalgo MP. Midpoint of sleep on school days is associated with depression among adolescents. Chronobiol Int. 2014 Mar;31(2):199-205. doi: 10.3109/07420528.2013.838575.	1	704
20.5167	6.68333	22.1583	8.60833	10.2	Germany	0	Arbabi et al	2015	Arbabi T, Vollmer C, Dorfler T, Randler C. The influence of chronotype and intelligence on academic achievement in primary school is mediated by conscientiousness, midpoint of sleep and motivation. Chronobiol Int. 2015 Apr;32(3):349-57. doi: 10.3109/07420528.2014.980508.	1	705
23	7	24.1	8.5	27.3	Brasil	0	Gontijo et al	2019	Gontijo CA, Cabral BBM, Balieiro LCT, Teixeira GP, Fahmy WM, Maia YCP, Crispim CA. Time-related eating patterns and chronotype are associated with diet quality in pregnant women. Chronobiol Int. 2019 Jan;36(1):75-84. doi: 10.1080/07420528.2018.1518328.	1	706
23.15	6.06667	23.9333	8.81667	17.5	Mexico	0	Valdez et al	1996	Valdez P, Ramírez C, García A. Delaying and extending sleep during weekends: sleep recovery or circadian effect? Chronobiol Int. 1996 Aug;13(3):191-8. doi: 10.3109/07420529609012652.	1	707
24	6.83333	26	10	21.6	Brasil	0	Silva et al	2016	Silva CM, Mota MC, Miranda MT, Paim SL, Waterhouse J, Crispim CA. Chronotype, social jetlag and sleep debt are associated with dietary intake among Brazilian undergraduate students. Chronobiol Int. 2016;33(6):740-8. doi: 10.3109/07420528.2016.1167712.	1	708
20.7167	6.33333	22.2667	8.56667	11	Germany	0	Randler	2008	Randler C. Differences in sleep and circadian preference between Eastern and Western German adolescents. Chronobiol Int. 2008 Jul;25(4):565-75. doi: 10.1080/07420520802257794.	1	709
20.9833	6.33333	22.85	9.05	12	Germany	0	Randler	2008	Randler C. Differences in sleep and circadian preference between Eastern and Western German adolescents. Chronobiol Int. 2008 Jul;25(4):565-75. doi: 10.1080/07420520802257794.	1	710
21.5	6.28333	23.1667	9.23333	13	Germany	0	Randler	2008	Randler C. Differences in sleep and circadian preference between Eastern and Western German adolescents. Chronobiol Int. 2008 Jul;25(4):565-75. doi: 10.1080/07420520802257794.	1	711
21.55	6.28333	23.4833	9.53333	14	Germany	0	Randler	2008	Randler C. Differences in sleep and circadian preference between Eastern and Western German adolescents. Chronobiol Int. 2008 Jul;25(4):565-75. doi: 10.1080/07420520802257794.	1	712
22.05	6.2	24.3	9.71667	15	Germany	0	Randler	2008	Randler C. Differences in sleep and circadian preference between Eastern and Western German adolescents. Chronobiol Int. 2008 Jul;25(4):565-75. doi: 10.1080/07420520802257794.	1	713
21.8667	6.25	24.5333	10.05	16	Germany	0	Randler	2008	Randler C. Differences in sleep and circadian preference between Eastern and Western German adolescents. Chronobiol Int. 2008 Jul;25(4):565-75. doi: 10.1080/07420520802257794.	1	714
21.6833	7.1	21.9167	7.65	2.5	Japan	0	Komada et al	2011	Komada Y, Abe T, Okajima I, Asaoka S, Matsuura N, Usui A, Shirakawa S, Inoue Y. Short sleep duration and irregular bedtime are associated with increased behavioral problems among Japanese preschool-age children. Tohoku J Exp Med. 2011 Jun;224(2):127-36. doi: 10.1620/tjem.224.127.	1	715
21.85	7.18333	22.1	7.7	4.5	Japan	0	Komada et al	2011	Komada Y, Abe T, Okajima I, Asaoka S, Matsuura N, Usui A, Shirakawa S, Inoue Y. Short sleep duration and irregular bedtime are associated with increased behavioral problems among Japanese preschool-age children. Tohoku J Exp Med. 2011 Jun;224(2):127-36. doi: 10.1620/tjem.224.127.	1	716
23.33	6.12	25.63	10.56	22.9	Saudi Arabia	0	Mirghani et al	2019	Mirghani HO, Albalawi KS, Alali OY, Albalawi WM, Albalawi KM, Aljohani TR, Albalawi WS. Breakfast skipping, late dinner intake and chronotype (eveningness-morningness) among medical students in Tabuk City, Saudi Arabia. Pan Afr Med J. 2019 Dec 5;34:178. doi: 10.11604/pamj.2019.34.178.16250.	1	717
21.75	7.55	22.15	8.35	1.7	Italy	0	Cerasuolo et al	2021	Cerasuolo M, Malloggi S, Conte F, Albinni B, De Rosa O, Rescott ML, Giganti F, Ficca G. The Effects of the COVID19-Related Lockdown Are Modulated by Age: An Italian Study in Toddlers and Pre-Schoolers. Brain Sci. 2021 Aug 9;11(8):1051. doi: 10.3390/brainsci11081051.	1	718
21.45	7.25	22.4	9	4.8	Italy	0	Cerasuolo et al	2021	Cerasuolo M, Malloggi S, Conte F, Albinni B, De Rosa O, Rescott ML, Giganti F, Ficca G. The Effects of the COVID19-Related Lockdown Are Modulated by Age: An Italian Study in Toddlers and Pre-Schoolers. Brain Sci. 2021 Aug 9;11(8):1051. doi: 10.3390/brainsci11081051.	1	719
23.3667	7.27778	24.0667	8.32222	34.2	Korea	0	Doi et al	2016	Doi Y, Ishihara K, Uchiyama M. Epidemiological study on chronotype among preschool children in Japan: Prevalence, sleep-wake patterns, and associated factors. Chronobiol Int. 2016;33(10):1340-1350. doi: 10.1080/07420528.2016.1217231.	1	720
23.9417	7.725	25.7833	10.1917	21.5	Italy	0	Malloggi et al	2021	Malloggi S, Conte F, Albinni B, Gronchi G, Ficca G, Giganti F. Sleep and psychological characteristics in habitual self-awakeners and forced awakeners. Chronobiol Int. 2021 Dec 6:1-10. doi: 10.1080/07420528.2021.2003375.	1	721
23	6	23.5	8	44	Switzerland	0	Albrecht et al	2021	Albrecht JN, Werner H, Yaw ML, Jenni OG, Huber R. Teachers' preference for later school start times. J Sleep Res. 2021 Dec 19:e13534. doi: 10.1111/jsr.13534.	1	722
23.65	6.31667	26.0667	11.3	13.5	Argentina	0	Ferrante et al	2021	Ferrante GR, Goldin A, Sigman M, Leone M. As Time Goes By: Effects of Basal Chronotype and School Timing on Chronotype Development During Adolescence.Research Square, 2021. DOI: https://doi.org/10.21203/rs.3.rs-1118245/v1	1	723
24.6333	6.41667	26.3667	11.5	17.5	Argentina	0	Ferrante et al	2021	Ferrante GR, Goldin A, Sigman M, Leone M. As Time Goes By: Effects of Basal Chronotype and School Timing on Chronotype Development During Adolescence.Research Square, 2021. DOI: https://doi.org/10.21203/rs.3.rs-1118245/v1	1	724
21.95	8.35	23.69	10.86	13	USA	0	Zhang et al	2017	Zhang J, Paksarian D, Lamers F, Hickie IB, He J, Merikangas KR. Sleep Patterns and Mental Health Correlates in US Adolescents. J Pediatr. 2017 Mar;182:137-143. doi: 10.1016/j.jpeds.2016.11.007.	1	725
22.3667	7.91667	24.0967	10.8167	14	USA	0	Zhang et al	2017	Zhang J, Paksarian D, Lamers F, Hickie IB, He J, Merikangas KR. Sleep Patterns and Mental Health Correlates in US Adolescents. J Pediatr. 2017 Mar;182:137-143. doi: 10.1016/j.jpeds.2016.11.007.	1	726
22.5167	7.7	24.3967	10.91	15	USA	0	Zhang et al	2017	Zhang J, Paksarian D, Lamers F, Hickie IB, He J, Merikangas KR. Sleep Patterns and Mental Health Correlates in US Adolescents. J Pediatr. 2017 Mar;182:137-143. doi: 10.1016/j.jpeds.2016.11.007.	1	727
22.75	7.51667	24.64	10.6467	16	USA	0	Zhang et al	2017	Zhang J, Paksarian D, Lamers F, Hickie IB, He J, Merikangas KR. Sleep Patterns and Mental Health Correlates in US Adolescents. J Pediatr. 2017 Mar;182:137-143. doi: 10.1016/j.jpeds.2016.11.007.	1	728
23.25	7.31667	25.06	10.4267	17	USA	0	Zhang et al	2017	Zhang J, Paksarian D, Lamers F, Hickie IB, He J, Merikangas KR. Sleep Patterns and Mental Health Correlates in US Adolescents. J Pediatr. 2017 Mar;182:137-143. doi: 10.1016/j.jpeds.2016.11.007.	1	729
23.55	7.28333	25.33	10.0433	18	USA	0	Zhang et al	2017	Zhang J, Paksarian D, Lamers F, Hickie IB, He J, Merikangas KR. Sleep Patterns and Mental Health Correlates in US Adolescents. J Pediatr. 2017 Mar;182:137-143. doi: 10.1016/j.jpeds.2016.11.007.	1	730
21.325	7.34167	21.85	7.83333	8.1	Finland	0	Pesonen et al	2010	Pesonen AK, Räikkönen K, Paavonen EJ, Heinonen K, Komsi N, Lahti J, Kajantie E, Järvenpää AL, Strandberg T. Sleep duration and regularity are associated with behavioral problems in 8-year-old children. Int J Behav Med. 2010 Dec;17(4):298-305. doi: 10.1007/s12529-009-9065-1.	1	731
23.25	6.91667	24.5	9.65	17.3	USA	0	Troxel et al	2018	Troxel WM, Tucker JS, Ewing B, Miles JNV, D'Amico EJ. Sleepy Teens and Energy Drink Use: Results From an Ethnically Diverse Sample of Youth. Behav Sleep Med. 2018 May-Jun;16(3):223-234. doi: 10.1080/15402002.2016.1188390.	1	732
23.3833	7	24.3333	9.96667	14.5	Hong Kong	0	Chung et al	2013	Chung KF, Kan KKK, Yeung WF. Sleep duration, sleep-wake schedule regularity, and body weight in Hong Kong Chinese adolescents. Biol Rthym Res 2013; 44(2):169-79	1	733
21.9167	7.03333	22.9167	8.83333	9.7	China	0	Zhang et al	2015	Zhang B, Hao Y, Zhou J, Jia F, Li X, Tang Y, Zheng H. The association between sleep patterns and overweight/obesity in Chinese children: a cross-sectional study. Neuropsychiatr Dis Treat. 2015 Aug 24;11:2209-16. doi: 10.2147/NDT.S90838.	1	734
22.6333	6.07333	23.9833	9.61333	15	USA	0	O'Brien et al	2005	O'Brien EM, Mindell JA. Sleep and risk-taking behavior in adolescents. Behav Sleep Med. 2005;3(3):113-33. doi: 10.1207/s15402010bsm0303_1.	1	735
23.1167	6.29667	24.7	10.08	16	USA	0	O'Brien et al	2005	O'Brien EM, Mindell JA. Sleep and risk-taking behavior in adolescents. Behav Sleep Med. 2005;3(3):113-33. doi: 10.1207/s15402010bsm0303_1.	1	736
23.2167	6.37667	25.25	10.1	17	USA	0	O'Brien et al	2005	O'Brien EM, Mindell JA. Sleep and risk-taking behavior in adolescents. Behav Sleep Med. 2005;3(3):113-33. doi: 10.1207/s15402010bsm0303_1.	1	737
23.4	5.98	25.4	10.1	18	USA	0	O'Brien et al	2005	O'Brien EM, Mindell JA. Sleep and risk-taking behavior in adolescents. Behav Sleep Med. 2005;3(3):113-33. doi: 10.1207/s15402010bsm0303_1.	1	738
25.12	7.18	26.48	10.48	22.6	Sudan	0	Mirghani et al	2015	Mirghani HO, Mohammed OS, Almurtadha YM, Ahmed MS. Good sleep quality is associated with better academic performance among Sudanese medical students. BMC Res Notes. 2015 Nov 23;8:706. doi: 10.1186/s13104-015-1712-9.	1	739
24.06	6.15	25.68	9.69	22.4	Saudi Arabia	0	Bahammam et al	2012	Bahammam AS, Alaseem AM, Alzakri AA, Almeneessier AS, Sharif MM. The relationship between sleep and wake habits and academic performance in medical students: a cross-sectional study. BMC Med Educ. 2012 Aug 1;12:61. doi: 10.1186/1472-6920-12-61.	1	740
23.915	7.01	24.495	8.235	14.7	USA	2	Gasperetti et al	2021	Gasperetti CE, Dong L, Harvey AG. The effect of the transdiagnostic sleep and circadian intervention (TranS-C) on actigraphic estimates of sleep and rest-activity rhythms in adolescents with an evening circadian preference. Sleep Health. 2021 Dec 16:S2352-7218(21)00222-9. doi: 10.1016/j.sleh.2021.10.007.	1	741
23.1	6.8	23.7667	7.58333	14.4	Italy	2	Filardi et al	2021	Filardi M, D'Anselmo A, Mazzoni A, Moresco M, Pizza F, Plazzi G. The importance of social zeitgeber in paediatric type 1 narcolepsy: What we can learn from the COVID-19 restrictions adopted in Italy? J Sleep Res. 2021 Jun 22:e13423. doi: 10.1111/jsr.13423.	1	742
21.3333	5.3	22.1	6.03333	9.2	Germany	2	Ziegler et al	2021	Ziegler M, Kaiser A, Igel C, Geissler J, Mechler K, Holz NE, Becker K, Döpfner M, Romanos M, Brandeis D, Hohmann S, Millenet S, Banaschewski T. Actigraphy-Derived Sleep Profiles of Children with and without Attention-Deficit/Hyperactivity Disorder (ADHD) over Two Weeks-Comparison, Precursor Symptoms, and the Chronotype. Brain Sci. 2021 Nov 27;11(12):1564. doi: 10.3390/brainsci11121564.	1	743
23.2333	6.73333	24.9167	10.2833	14	USA	0	Owens et al	2010	Owens JA, Belon K, Moss P. Impact of delaying school start time on adolescent sleep, mood, and behavior. Arch Pediatr Adolesc Med. 2010 Jul;164(7):608-14. doi: 10.1001/archpediatrics.2010.96.	1	744
23.5167	6.91667	24.65	10.3833	15	USA	0	Owens et al	2010	Owens JA, Belon K, Moss P. Impact of delaying school start time on adolescent sleep, mood, and behavior. Arch Pediatr Adolesc Med. 2010 Jul;164(7):608-14. doi: 10.1001/archpediatrics.2010.96.	1	745
23.6833	6.86667	25.0333	10.5	16	USA	0	Owens et al	2010	Owens JA, Belon K, Moss P. Impact of delaying school start time on adolescent sleep, mood, and behavior. Arch Pediatr Adolesc Med. 2010 Jul;164(7):608-14. doi: 10.1001/archpediatrics.2010.96.	1	746
24.2167	7.08333	25.2	10.3	17	USA	0	Owens et al	2010	Owens JA, Belon K, Moss P. Impact of delaying school start time on adolescent sleep, mood, and behavior. Arch Pediatr Adolesc Med. 2010 Jul;164(7):608-14. doi: 10.1001/archpediatrics.2010.96.	1	747
21.6417	5.29167	23.55	9.55833	13.5	USA	0	Wolfson et al	2007	Wolfson AR, Spaulding NL, Dandrow C, Baroni EM. Middle school start times: the importance of a good night's sleep for young adolescents. Behav Sleep Med. 2007;5(3):194-209. doi: 10.1080/15402000701263809.	1	748
20.38	7.9	23.64	10.61	9	Brasil	0	Panjeh et al	2021	Panjeh S, Pompeia S, Cogo-Moreira H. Probing different aspects of short and ill-timed sleep in adolescents using the Morningness-Eveningness Scale for Children. Chronobiol Int. 2021 Nov 9:1-13. doi: 10.1080/07420528.2021.1998104.	1	749
22.01	7.72	23.66	9.19	10	Brasil	0	Panjeh et al	2021	Panjeh S, Pompeia S, Cogo-Moreira H. Probing different aspects of short and ill-timed sleep in adolescents using the Morningness-Eveningness Scale for Children. Chronobiol Int. 2021 Nov 9:1-13. doi: 10.1080/07420528.2021.1998104.	1	750
22.84	7.3	24.44	10.16	11	Brasil	0	Panjeh et al	2021	Panjeh S, Pompeia S, Cogo-Moreira H. Probing different aspects of short and ill-timed sleep in adolescents using the Morningness-Eveningness Scale for Children. Chronobiol Int. 2021 Nov 9:1-13. doi: 10.1080/07420528.2021.1998104.	1	751
22.61	7.9	24.2	9.83	12	Brasil	0	Panjeh et al	2021	Panjeh S, Pompeia S, Cogo-Moreira H. Probing different aspects of short and ill-timed sleep in adolescents using the Morningness-Eveningness Scale for Children. Chronobiol Int. 2021 Nov 9:1-13. doi: 10.1080/07420528.2021.1998104.	1	752
22.82	7.9	24.66	10.24	13	Brasil	0	Panjeh et al	2021	Panjeh S, Pompeia S, Cogo-Moreira H. Probing different aspects of short and ill-timed sleep in adolescents using the Morningness-Eveningness Scale for Children. Chronobiol Int. 2021 Nov 9:1-13. doi: 10.1080/07420528.2021.1998104.	1	753
22.95	7.45	24.66	10.43	14	Brasil	0	Panjeh et al	2021	Panjeh S, Pompeia S, Cogo-Moreira H. Probing different aspects of short and ill-timed sleep in adolescents using the Morningness-Eveningness Scale for Children. Chronobiol Int. 2021 Nov 9:1-13. doi: 10.1080/07420528.2021.1998104.	1	754
22.77	6.55	24.66	10.67	15	Brasil	0	Panjeh et al	2021	Panjeh S, Pompeia S, Cogo-Moreira H. Probing different aspects of short and ill-timed sleep in adolescents using the Morningness-Eveningness Scale for Children. Chronobiol Int. 2021 Nov 9:1-13. doi: 10.1080/07420528.2021.1998104.	1	755
22	6.77	24.77	10.19	16	Brasil	0	Panjeh et al	2021	Panjeh S, Pompeia S, Cogo-Moreira H. Probing different aspects of short and ill-timed sleep in adolescents using the Morningness-Eveningness Scale for Children. Chronobiol Int. 2021 Nov 9:1-13. doi: 10.1080/07420528.2021.1998104.	1	756
22.94	7.5	24.5	9.72	17	Brasil	0	Panjeh et al	2021	Panjeh S, Pompeia S, Cogo-Moreira H. Probing different aspects of short and ill-timed sleep in adolescents using the Morningness-Eveningness Scale for Children. Chronobiol Int. 2021 Nov 9:1-13. doi: 10.1080/07420528.2021.1998104.	1	757
23.1	6.56667	23.4333	8.2	13.5	Japan	0	Tamura et al	2021	Tamura N, Komada Y, Inoue Y, Tanaka H. Social jetlag among Japanese adolescents: Association with irritable mood, daytime sleepiness, fatigue, and poor academic performance. Chronobiol Int. 2021 Nov 3:1-12. doi: 10.1080/07420528.2021.1996388.	1	758
23.35	7.06667	24.1167	7.88333	30.8	Germany	1	Cabanel et al	2021	Cabanel N, Schmidt AM, Fockenberg S, Brückmann K, Müller MJ, Kundermann B, Haag A. Circadian preference and sleep quality in healthy controls and psychiatric inpatients with major depressive disorder - An actigraphy study incorporating morning and evening mood assessments. Chronobiol Int. 2021 Nov 1:1-12. doi: 10.1080/07420528.2021.1994583.	1	759
23.9333	8.36667	24.35	9.98333	15.4	Czech Republic	2	Příhodová et al	2021	Příhodová I, Dostálová S, Bielicki P, Skibová J, Nevšímalová S, Šonka K. Delayed Sleep-Wake Phase Disorder: Can Polysomnography Be Useful? Pediatr Neurol. 2021 Nov 27;127:28-31. doi: 10.1016/j.pediatrneurol.2021.11.010.	1	760
22.9833	5.48333	24.4	9.58333	16.3	Mexico	0	Arrona-Palacios et al	2021	Arrona-Palacios A, Díaz-Morales JF, Parra-Robledo Z, Adan A. Sleep and Depressive Symptoms in the Morningness/Eveningness-Suicidal Ideation Relationship Depend on School Shift in Mexican Adolescents. J Clin Med. 2021 Oct 13;10(20):4681. doi: 10.3390/jcm10204681.	1	761
23.45	7.21667	24.2667	9.01667	16.9	Australia	1	Maskevich et al	2021	Maskevich S, Shen L, Drummond SPA, Bei B. What time do you plan to sleep tonight? An intense longitudinal study of adolescent daily sleep self-regulation via planning and its associations with sleep opportunity. J Child Psychol Psychiatry. 2021 Nov 22. doi: 10.1111/jcpp.13540.	1	762
23	7.46667	24.4	10.25	16.2	France	0	Saidi et al	2021	Saidi O, Pereira B, Peyrel P, Maso F, Doré E, Rochette E, Ratel S, Walrand S, Duché P. Sleep pattern and staging in elite adolescent rugby players during the in-season competitive phase compared to an age matched non-athlete population. Eur J Sport Sci. 2021 Feb 25:1-12. doi: 10.1080/17461391.2021.1887368.	1	763
24.3667	7.36667	25.7	10.2167	15.5	Iceland	2	Stefansdottir et al	2021	Stefansdottir R, Rognvaldsdottir V, Chen KY, Johannsson E, Brychta RJ. Sleep timing and consistency are associated with the standardised test performance of Icelandic adolescents. J Sleep Res. 2021 Jun 14:e13422. doi: 10.1111/jsr.13422.	1	764
23.3167	6.8	25.5833	11.2667	17.4	Norway	0	Almaas et al	2021	Almaas MAJ, Heradstveit O, Askeland KG, Sivertsen B, Nilsen SA, Hysing M. Sleep patterns and insomnia among adolescents receiving child welfare services: A population-based study. Sleep Health. 2021 Nov 7:652. doi: 10.1016/j.sleh.2021.09.006.	1	765
23.9333	7.76667	24.2917	9.125	39.3	Spain	0	Hashemzadeh et al	2021	Hashemzadeh I, Marquez-Arrico JE, Hashemzadeh K, Navarro JF, Adan A. Circadian Functioning and Quality of Life in Substance Use Disorder Patients With and Without Comorbid Major Depressive Disorder. Front Psychiatry. 2021 Oct 29;12:750500. doi: 10.3389/fpsyt.2021.750500.	1	766
21.9167	6.33333	24.3667	10.1167	12.9	Germany	0	Jankovic et al	2021	Jankovic N, Schmitting S, Krüger B, Nöthlings U, Buyken A, Alexy U. Changes in chronotype and social jetlag during adolescence and their association with concurrent changes in BMI-SDS and body composition, in the DONALD Study. Eur J Clin Nutr. 2021 Oct 26. doi: 10.1038/s41430-021-01024-y.	1	767
22.4667	6.13333	24.0667	9.06667	15.1	Germany	0	Jankovic et al	2021	Jankovic N, Schmitting S, Krüger B, Nöthlings U, Buyken A, Alexy U. Changes in chronotype and social jetlag during adolescence and their association with concurrent changes in BMI-SDS and body composition, in the DONALD Study. Eur J Clin Nutr. 2021 Oct 26. doi: 10.1038/s41430-021-01024-y.	1	768
21.6333	6.65	22.05	6.9	14.8	Australia	2	O’Callaghan et al	2021	O’Callaghan VS, NK Hansell, W Guo, JS Carpenter, H Shou, LT Strike, ...Genetic and environmental influences on sleep-wake behaviors in adolescence. Sleep Advances 2021, 2 (1), zpab018	1	769
22.8667	6.66667	23.9167	8.68333	29.2	Finland	0	Berntzen et al	2021	Berntzen BJ, Paavonen EJ, Rissanen A, Kaprio J, Pietiläinen KH. Sleep and lifestyle in young adult monozygotic twin pairs discordant for body mass index. Sleep Health. 2021 Oct;7(5):556-564. doi: 10.1016/j.sleh.2021.04.002.	1	770
25	7.91667	26.35	10.7167	17	Uruguay	2	Estevan et al	2021	Estevan I, Tassino B, Vetter C, Silva A. Bidirectional association between light exposure and sleep in adolescents. J Sleep Res. 2021 Oct 4:e13501. doi: 10.1111/jsr.13501.	1	771
23.3765	6.82577	23.8559	8.24488	40	World	0	Brandão et al	2021	Brandão LEM, Martikainen T, Merikanto I, Holzinger B, Morin CM, Espie CA, Bolstad CJ, Leger D, Chung F, Plazzi G, Dauvilliers Y, Matsui K, De Gennaro L, Sieminski M, Nadorff MR, Chan NY, Wing YK, Mota-Rolim SA, Inoue Y, Partinen M, Benedict C, Bjorvatn B, Cedernaes J. Social Jetlag Changes During the COVID-19 Pandemic as a Predictor of Insomnia - A Multi-National Survey Study. Nat Sci Sleep. 2021…	1	772
22.5	6.25	24.4	11	16.5	Norway	0	Saxvig et al	2021	Saxvig IW, Pallesen S, Sivertsen B, Hysing M, Evanger LN, Bjorvatn B. Sleep during COVID-19-related school lockdown, a longitudinal study among high school students. J Sleep Res. 2021 Oct 3:e13499. doi: 10.1111/jsr.13499.	1	773
24.6	7.9	25.59	10.49	16.4	Australia	0	Lang et al	2021	Lang, C., Richardson, C., Micic, G., & Gradisar, M. (2021, September 29). Understanding sleep-wake behavior in late chronotype adolescents: The role of circadian phase, sleep timing, and evening vigilance. https://doi.org/10.31234/osf.io/npkeu	1	774
22.5246	6.69289	23.1516	8.24497	54.0273	Finland	0	Suikki et al	2021	Suikki T, Maukonen M, Partonen T, Jousilahti P, Kanerva N, Männistö S. Association between social jet lag, quality of diet and obesity by diurnal preference in Finnish adult population. Chronobiol Int. 2021 May;38(5):720-731. doi: 10.1080/07420528.2021.1876721.	1	775
23.7	6.3	24.2	8.1	40.1	Finland	0	Kahn et al	2021	Kahn M, Korhonen T, Leinonen L, Martinmaki K, Kuula L, Pesonen AK, Gradisar M. Is It Time We Stop Discouraging Evening Physical Activity? New Real-World Evidence From 150,000 Nights. Front Public Health. 2021 Nov 4;9:772376. doi: 10.3389/fpubh.2021.772376.	1	776
22.1	6.01667	22.1167	6.85	47	France	2	Pépin et al	2021	Pépin JL, Bailly S, Mordret E, Gaucher J, Tamisier R, Ben Messaoud R, Arnal PJ, Mignot E. Greatest changes in objective sleep architecture during COVID-19 lockdown in night owls with increased REM sleep. Sleep. 2021 Sep 13;44(9):zsab075. doi: 10.1093/sleep/zsab075.	1	777
22.3	6.1	22.5	8.2	12	China	0	Pan et al	2012	Pan JY, Chou MF, Zhang J, Liu YP. Sleep patterns, insomnia, and daytime sleepiness between Guangdong and Macau Chinese adolescents: a cross-cultural comparison study. Biological Rhythm Research. 2012;43:527–39.	1	778
22.4	6.1	22.7	8.1	13	China	0	Pan et al	2012	Pan JY, Chou MF, Zhang J, Liu YP. Sleep patterns, insomnia, and daytime sleepiness between Guangdong and Macau Chinese adolescents: a cross-cultural comparison study. Biological Rhythm Research. 2012;43:527–39.	1	779
22.4	6	23	8.1	14	China	0	Pan et al	2012	Pan JY, Chou MF, Zhang J, Liu YP. Sleep patterns, insomnia, and daytime sleepiness between Guangdong and Macau Chinese adolescents: a cross-cultural comparison study. Biological Rhythm Research. 2012;43:527–39.	1	780
22.5	6.1	23.2	8.2	15	China	0	Pan et al	2012	Pan JY, Chou MF, Zhang J, Liu YP. Sleep patterns, insomnia, and daytime sleepiness between Guangdong and Macau Chinese adolescents: a cross-cultural comparison study. Biological Rhythm Research. 2012;43:527–39.	1	781
22.7	6	23.5	8.1	16	China	0	Pan et al	2012	Pan JY, Chou MF, Zhang J, Liu YP. Sleep patterns, insomnia, and daytime sleepiness between Guangdong and Macau Chinese adolescents: a cross-cultural comparison study. Biological Rhythm Research. 2012;43:527–39.	1	782
22.7	5.9	23.5	8.1	17	China	0	Pan et al	2012	Pan JY, Chou MF, Zhang J, Liu YP. Sleep patterns, insomnia, and daytime sleepiness between Guangdong and Macau Chinese adolescents: a cross-cultural comparison study. Biological Rhythm Research. 2012;43:527–39.	1	783
22.8	5.9	23.5	8.2	18	China	0	Pan et al	2012	Pan JY, Chou MF, Zhang J, Liu YP. Sleep patterns, insomnia, and daytime sleepiness between Guangdong and Macau Chinese adolescents: a cross-cultural comparison study. Biological Rhythm Research. 2012;43:527–39.	1	784
23.7	7.1	24.3	10.8	12	Macao	0	Pan et al	2012	Pan JY, Chou MF, Zhang J, Liu YP. Sleep patterns, insomnia, and daytime sleepiness between Guangdong and Macau Chinese adolescents: a cross-cultural comparison study. Biological Rhythm Research. 2012;43:527–39.	1	785
23.5	7.2	24.5	10.8	13	Macao	0	Pan et al	2012	Pan JY, Chou MF, Zhang J, Liu YP. Sleep patterns, insomnia, and daytime sleepiness between Guangdong and Macau Chinese adolescents: a cross-cultural comparison study. Biological Rhythm Research. 2012;43:527–39.	1	786
23.7	7.2	25	11.1	14	Macao	0	Pan et al	2012	Pan JY, Chou MF, Zhang J, Liu YP. Sleep patterns, insomnia, and daytime sleepiness between Guangdong and Macau Chinese adolescents: a cross-cultural comparison study. Biological Rhythm Research. 2012;43:527–39.	1	787
23.6	7.3	25	10.8	15	Macao	0	Pan et al	2012	Pan JY, Chou MF, Zhang J, Liu YP. Sleep patterns, insomnia, and daytime sleepiness between Guangdong and Macau Chinese adolescents: a cross-cultural comparison study. Biological Rhythm Research. 2012;43:527–39.	1	788
23.8	7.4	25.1	10.9	16	Macao	0	Pan et al	2012	Pan JY, Chou MF, Zhang J, Liu YP. Sleep patterns, insomnia, and daytime sleepiness between Guangdong and Macau Chinese adolescents: a cross-cultural comparison study. Biological Rhythm Research. 2012;43:527–39.	1	789
23.7	7.3	25.3	11	17	Macao	0	Pan et al	2012	Pan JY, Chou MF, Zhang J, Liu YP. Sleep patterns, insomnia, and daytime sleepiness between Guangdong and Macau Chinese adolescents: a cross-cultural comparison study. Biological Rhythm Research. 2012;43:527–39.	1	790
24.2	7.2	25.8	11	18	Macao	0	Pan et al	2012	Pan JY, Chou MF, Zhang J, Liu YP. Sleep patterns, insomnia, and daytime sleepiness between Guangdong and Macau Chinese adolescents: a cross-cultural comparison study. Biological Rhythm Research. 2012;43:527–39.	1	791
22.5	6.25	24	9.25	16	Switzerland	0	Albrecht et al	2022	Albrecht JN, Werner H, Rieger N, Widmer N, Janisch D, Huber R, Jenni OG. Association Between Homeschooling and Adolescent Sleep Duration and Health During COVID-19 Pandemic High School Closures. JAMA Netw Open. 2022 Jan 4;5(1):e2142100. doi: 10.1001/jamanetworkopen.2021.42100.	1	792
22.1333	6.75	23.25	9.36667	15	Canada	0	Potvin et al	2022	Potvin J, Ramos Socarras L, Forest G. Sleeping through a Lockdown: How Adolescents and Young Adults Struggle with Lifestyle and Sleep Habits Upheaval during a Pandemic. Behav Sleep Med. 2022 Jan 5:1-17. doi: 10.1080/15402002.2021.2019035.	1	793
22.6833	7.35	23.75	9.4	21.5	Canada	0	Potvin et al	2022	Potvin J, Ramos Socarras L, Forest G. Sleeping through a Lockdown: How Adolescents and Young Adults Struggle with Lifestyle and Sleep Habits Upheaval during a Pandemic. Behav Sleep Med. 2022 Jan 5:1-17. doi: 10.1080/15402002.2021.2019035.	1	794
23.0667	6.91667	23.7833	8.43333	26.5	Australia	0	Facer-Childs et al	2021	Facer-Childs ER, Hoffman D, Tran JN, Drummond SPA, Rajaratnam SMW. Sleep and mental health in athletes during COVID-19 lockdown. Sleep. 2021 May 14;44(5):zsaa261. doi: 10.1093/sleep/zsaa261.	1	795
23.35	6.75	24.2167	10.1833	14.5	Hong Kong	0	Li et al	2018	Li SX, Chan NY, Man Yu MW, Lam SP, Zhang J, Yan Chan JW, Li AM, Wing YK. Eveningness chronotype, insomnia symptoms, and emotional and behavioural problems in adolescents. Sleep Med. 2018 Jul;47:93-99. doi: 10.1016/j.sleep.2018.03.025.	1	796
24.6	7.2	25.15	9.45	18.4	Japan	0	Tanioka et al	2022	Tanioka K, Kayaba M, Tomishima S, Komada Y, Inoue Y. Changes in sleep behavior, sleep problems, and psychological distress/health-related quality of life of young Japanese individuals before and during the COVID-19 pandemic. Chronobiol Int. 2022 Feb 9:1-11. doi: 10.1080/07420528.2022.2034839.	1	797
24.05	7.35	24.7	9.1	25.9	Japan	0	Tanioka et al	2022	Tanioka K, Kayaba M, Tomishima S, Komada Y, Inoue Y. Changes in sleep behavior, sleep problems, and psychological distress/health-related quality of life of young Japanese individuals before and during the COVID-19 pandemic. Chronobiol Int. 2022 Feb 9:1-11. doi: 10.1080/07420528.2022.2034839.	1	798
22.25	7	23.3833	8.83333	29	World	0	AMHSI Research Team et al	2020	AMHSI Research Team; Milken Research Team, Roitblat Y, Burger J, Leit A, Nehuliaieva L, Umarova GS, Kaliberdenko V, Kulanthaivel S, Buchris N, Shterenshis M. Stay-at-home circumstances do not produce sleep disorders: An international survey during the COVID-19 pandemic. J Psychosom Res. 2020 Dec;139:110282. doi: 10.1016/j.jpsychores.2020.110282.	1	799
23.2	7.25	23.9167	8.83333	50	World	0	AMHSI Research Team et al	2020	AMHSI Research Team; Milken Research Team, Roitblat Y, Burger J, Leit A, Nehuliaieva L, Umarova GS, Kaliberdenko V, Kulanthaivel S, Buchris N, Shterenshis M. Stay-at-home circumstances do not produce sleep disorders: An international survey during the COVID-19 pandemic. J Psychosom Res. 2020 Dec;139:110282. doi: 10.1016/j.jpsychores.2020.110282.	1	800
22.4167	6.41667	23.9667	9.31667	14	USA	0	Troxel et al	2022	Troxel WM, Palimaru AI, Klein DJ, Dong L, Dickerson DL, Brown RA, Johnson CL, D'Amico EJ. Changes in Sleep-Wake Patterns and Disturbances Before and During COVID-19 in Urban American Indian/ Alaska Native Adolescents. Behav Sleep Med. 2022 Jan 6:1-14. doi: 10.1080/15402002.2021.2022679.	1	801
25.45	8.38333	26.15	10.6667	20.7	Hong Kong	0	Cheung et al	2022	Cheung FTW, Ho AWY, Chan JWY, Li X, Chan NY, Zhang J, Ho CS, Wing YK, Li SX. Validation of the Chinese version of the Munich Chronotype Questionnaire (MCTQHK) in Hong Kong Chinese youths. Chronobiol Int. 2022 Jan 27:1-12. doi: 10.1080/07420528.2022.2025821.	1	802
24.125	7.63333	24.775	9.31667	23	Italy	0	Montagnese et al	2022	Montagnese Sara, Lisa Zarantonello, Chiara Formentin, Gianluca Giusti, Chiara Mangini, Cheryl M. Isherwood, Paolo Ferrari, Antonio Paoli, Daniela Mapelli, Rosario Rizzuto, Stefano Toppo, Debra J. Skene, Roberto Vettor, Rodolfo Costa. Sleep and circadian indices for planning post-pandemic university timetables.doi: https://doi.org/10.1101/2022.01.05.22268660	1	803
25.3608	8.9725	25.6008	9.76583	25	Israel	1	Lan et al	2022	Lan A, Kotler D, Kronfeld-Schor N, Stukalin Y, Einat H. Changes in sleep patterns of college students in Israel during COVID-19 lockdown, a sleep diaries study. Sleep Biol Rhythms. 2022 Jan 10:1-6. doi: 10.1007/s41105-021-00371-4.	1	804
24.9333	8.2	25.3	9.18333	22.1	Japan	0	Ohashi et al	2022	Ohashi M, Lee SI, Eto T, Uotsu N, Tarumizu C, Matsuoka S, Yasuo S, Higuchi S. Intake of L-serine before bedtime prevents the delay of the circadian phase in real life. J Physiol Anthropol. 2022 Aug 26;41(1):31. doi: 10.1186/s40101-022-00306-z.	1	805
23.3	6.5	24.8	9.8	16.5	Germany	0	Biller et al	2022	Biller AM, Molenda C, Zerbini G, Roenneberg T, Winnebeck EC. Sleep improvements on days with later school starts persist after 1 year in a flexible start system. Sci Rep. 2022 Feb 18;12(1):2787. doi: 10.1038/s41598-022-06209-4.	1	806
23.8	7.25	24.4833	8.93333	43.4	Portugal	0	Silva et al	2022	Silva, Beatriz Marques, Sandra Carvalho Bos, António José Vilar Queirós & António Ferreira Macedo (2022) Psychological factors and healthy sleep in a Portuguese sample of employees with regular working hours, Biological Rhythm Research, DOI: 10.1080/09291016.2022.2045058	1	807
22.3	6.60417	22.8875	8.34583	14.4	Germany	2	Paciello et al	2022	Paciello LM, Quante M, Weidenauer C, Rueschman M, Nieratschker V, Poets CF, Randler C. Validity of chronotype questionnaires in adolescents: Correlations with actigraphy. J Sleep Res. 2022 Mar 5:e13576. doi: 10.1111/jsr.13576.	1	808
23.4833	6.98333	24.6833	9.86667	27.7	Mexico	0	Ramírez et al	2022	Ramírez C, García A, Santos I, Borrani J, Valdez P. Changes in sleep habits during the lockdown for the COVID-19 pandemic in the population and people attending a morning or an afternoon shift in Monterrey, Mexico. Chronobiol Int. 2022 Mar 14:1-18. doi: 10.1080/07420528.2022.2049809.	1	809
21.3333	6.63333	21.6767	7.75667	9.2	China	0	Chen et al	2022	Chen Y, Zhao A, Lyu J, Hu Y, Yin Y, Qu J, Tong S, Li S. Association of delayed chronotype with allergic diseases in primary school children. Chronobiol Int. 2022 Mar 14:1-12. doi: 10.1080/07420528.2022.2040527.	1	810
23.2333	7.25	24.5	9.46667	21	Germany	0	Staller et al	2022	Staller N, Kalbacher L, Randler C. Impact of pandemic lockdown on learning behaviour and sleep quality in German students: Results of an online survey before and during the pandemic. Somnologie (Berl). 2022;26(2):98-105. doi:10.1007/s11818-022-00346-8	1	811
23.1	6.16667	23.4667	8.5	42.7	Mexico	0	Arrona-Palacios et al	2022	Arrona-Palacios A, Rebolledo-Mendez G, Escamilla J, Hosseini S, Duffy J. Effects of COVID-19 lockdown on sleep duration, sleep quality and burnout in faculty members of higher education in Mexico. Cien Saude Colet. 2022 Aug;27(8):2985-2993. doi: 10.1590/1413-81232022278.04322021.	1	812
22.6167	6.4	24.1167	9.45	16.2	USA	0	Wesley et al	2022	Wesley KL, Cooper EH, Brinton JT, Meier M, Honaker S, Simon SL. A National Survey of U.S. Adolescent Sleep Duration, Timing, and Social Jetlag During the COVID-19 Pandemic. Behav Sleep Med. 2022 Jun 14:1-13. doi: 10.1080/15402002.2022.2086871.	1	813
23.5833	7.25	24.2167	8.76667	40.2	Ireland	0	Raman&Coogan	2022	Raman S, Coogan AN. Effects of societal-level COVID-19 mitigation measures on the timing and quality of sleep in Ireland. Sleep Med. 2022 Mar;91:179-184. doi: 10.1016/j.sleep.2021.02.024.	1	814
22.6433	6.31333	23.18	7.27333	39	USA	2	Czeisler et al	2022	Czeisler MÉ, Capodilupo ER, Weaver MD, Czeisler CA, Howard ME, Rajaratnam SMW. Prior sleep-wake behaviors are associated with mental health outcomes during the COVID-19 pandemic among adult users of a wearable device in the United States. Sleep Health. 2022 Jun;8(3):311-321. doi: 10.1016/j.sleh.2022.03.001	1	815
23.65	6.31667	26.0667	11.3	13.5	Spain	0	Ferrante et al	2022	Rodríguez Ferrante G, Goldin AP, Sigman M, Leone MJ. Chronotype at the beginning of secondary school and school timing are both associated with chronotype development during adolescence. Sci Rep. 2022 May 17;12(1):8207. doi: 10.1038/s41598-022-11928-9.	1	816
24.6333	6.41667	26.3667	11.5	17.5	Spain	0	Ferrante et al	2022	Rodríguez Ferrante G, Goldin AP, Sigman M, Leone MJ. Chronotype at the beginning of secondary school and school timing are both associated with chronotype development during adolescence. Sci Rep. 2022 May 17;12(1):8207. doi: 10.1038/s41598-022-11928-9.	1	817
23.4975	7.04	24.825	9.575	16	Brasil	2	de Araújo et al	2022	de Araújo LBG, Bianchin S, Pedrazzoli M, Louzada FM, Beijamini F. Multiple positive outcomes of a later school starting time for adolescents. Sleep Health. 2022 Jul 12:S2352-7218(22)00057-2. doi: 10.1016/j.sleh.2022.04.002.	1	818
20.25	7.1	20.55	7.35	5.5	USA	0	Meltzer et al	2022	Meltzer LJ, Plog AE, Wahlstrom KL, Strand MJ. Biology vs. ecology: a longitudinal examination of sleep, development, and a change in school start times. Sleep Med. 2022 Feb;90:176-184. doi: 10.1016/j.sleep.2022.01.003.	1	819
20.3	7.05	21.12	7.4	6.5	USA	0	Meltzer et al	2022	Meltzer LJ, Plog AE, Wahlstrom KL, Strand MJ. Biology vs. ecology: a longitudinal examination of sleep, development, and a change in school start times. Sleep Med. 2022 Feb;90:176-184. doi: 10.1016/j.sleep.2022.01.003.	1	820
20.42	7.05	21.23	7.47	7.5	USA	0	Meltzer et al	2022	Meltzer LJ, Plog AE, Wahlstrom KL, Strand MJ. Biology vs. ecology: a longitudinal examination of sleep, development, and a change in school start times. Sleep Med. 2022 Feb;90:176-184. doi: 10.1016/j.sleep.2022.01.003.	1	821
20.55	7	21.55	8.12	8.5	USA	0	Meltzer et al	2022	Meltzer LJ, Plog AE, Wahlstrom KL, Strand MJ. Biology vs. ecology: a longitudinal examination of sleep, development, and a change in school start times. Sleep Med. 2022 Feb;90:176-184. doi: 10.1016/j.sleep.2022.01.003.	1	822
21.05	7	22.1	8.15	9.5	USA	0	Meltzer et al	2022	Meltzer LJ, Plog AE, Wahlstrom KL, Strand MJ. Biology vs. ecology: a longitudinal examination of sleep, development, and a change in school start times. Sleep Med. 2022 Feb;90:176-184. doi: 10.1016/j.sleep.2022.01.003.	1	823
21.17	6.29	22.21	8.2	10.5	USA	0	Meltzer et al	2022	Meltzer LJ, Plog AE, Wahlstrom KL, Strand MJ. Biology vs. ecology: a longitudinal examination of sleep, development, and a change in school start times. Sleep Med. 2022 Feb;90:176-184. doi: 10.1016/j.sleep.2022.01.003.	1	824
21.3	6.28	22.48	8.45	11.5	USA	0	Meltzer et al	2022	Meltzer LJ, Plog AE, Wahlstrom KL, Strand MJ. Biology vs. ecology: a longitudinal examination of sleep, development, and a change in school start times. Sleep Med. 2022 Feb;90:176-184. doi: 10.1016/j.sleep.2022.01.003.	1	825
21.45	6.25	23.1	9.1	12.5	USA	0	Meltzer et al	2022	Meltzer LJ, Plog AE, Wahlstrom KL, Strand MJ. Biology vs. ecology: a longitudinal examination of sleep, development, and a change in school start times. Sleep Med. 2022 Feb;90:176-184. doi: 10.1016/j.sleep.2022.01.003.	1	826
22.07	5.45	23.35	9.15	13.5	USA	0	Meltzer et al	2022	Meltzer LJ, Plog AE, Wahlstrom KL, Strand MJ. Biology vs. ecology: a longitudinal examination of sleep, development, and a change in school start times. Sleep Med. 2022 Feb;90:176-184. doi: 10.1016/j.sleep.2022.01.003.	1	827
22.13	5.45	23.4	9.17	14.5	USA	0	Meltzer et al	2022	Meltzer LJ, Plog AE, Wahlstrom KL, Strand MJ. Biology vs. ecology: a longitudinal examination of sleep, development, and a change in school start times. Sleep Med. 2022 Feb;90:176-184. doi: 10.1016/j.sleep.2022.01.003.	1	828
22.2	5.45	23.4	9.12	15.5	USA	0	Meltzer et al	2022	Meltzer LJ, Plog AE, Wahlstrom KL, Strand MJ. Biology vs. ecology: a longitudinal examination of sleep, development, and a change in school start times. Sleep Med. 2022 Feb;90:176-184. doi: 10.1016/j.sleep.2022.01.003.	1	829
22.4833	6.8	24.3333	10.6333	16.6	Norway	0	Saxvig et al	2021	Saxvig IW, Evanger LN, Pallesen S, Hysing M, Sivertsen B, Gradisar M, Bjorvatn B. Circadian typology and implications for adolescent sleep health. Results from a large, cross-sectional, school-based study. Sleep Med. 2021 Jul;83:63-70. doi: 10.1016/j.sleep.2021.04.020.	1	830
22.8	7.48333	24.3167	10.35	12.9	Spain	0	Díaz-Morales	2015	Díaz-Morales JF. Morningness–eveningness scale for children (MESC): Spanish normative data and factorial invariance according to sex and age. Pers Individ Dif 2015;87:116-20.	1	831
25.0667	8.18333	25.65	9.93333	20.8	Singapore	1	Yeo et al	2021	Yeo, Sing Chen, Jacinda Tan, Clin Lai, Samantha Lim, Yuvan Chandramoghan, Joshua Gooley. University-wide chronotyping shows late-type students have lower grades, shorter sleep, and more absenteeism University-wide chronotyping shows late-type students have lower grades, shorter sleep, poorer well-being, lower self-regulation, and more absenteeism. BioRxiv. 2021	1	832
25.8	8.18333	26.0333	9.08333	20.8	Singapore	2	Yeo et al	2021	Yeo, Sing Chen, Jacinda Tan, Clin Lai, Samantha Lim, Yuvan Chandramoghan, Joshua Gooley. University-wide chronotyping shows late-type students have lower grades, shorter sleep, and more absenteeism University-wide chronotyping shows late-type students have lower grades, shorter sleep, poorer well-being, lower self-regulation, and more absenteeism. BioRxiv. 2021	1	832
22.075	7.63333	22.5333	8.91667	8.8	Portugal	0	Almeida et al	2022	Almeida,Filipa, Luís Pires, Catarina Bettencourt, Rita Almeida, Daniel Ruivo Marques, José Leitão & Ana Allen Gomes (2022) Momentary emotional states in primary school children: combined effects of chronotype X time-of-day, Biological Rhythm Research, DOI: 10.1080/09291016.2022.2081400	1	834
24.3167	7.28333	24.8167	8.38333	21.9	Bangladesh	0	Hasan et al	2022	Hasan MM, Díaz-Morales JF, Khan MHA. 2021. Bangla version of the Composite Scale of Morningness: Factor invariance and validity with sleep habits, mood and mental health. Biol Rhythm Res. 1–15. doi:https://doi.org/10.1080/09291016.2021.1949516	1	835
22.85	7.33333	23.4	8.61667	27.7	Brasil	0	Balieiro et al	2022	Balieiro LCT, Gontijo CA, Marot LP, Teixeira GP, Fahmy WM, Moreno CRC, Maia YCP, Crispim CA. Circadian misalignment measured by social jetlag from early to late pregnancy and its association with nutritional status: a longitudinal study. Sci Rep. 2021 Sep 21;11(1):18678. doi: 10.1038/s41598-021-97946-5.	1	836
22.8167	7.4	23.85	8.76667	27.7	Brasil	0	Balieiro et al	2022	Balieiro LCT, Gontijo CA, Marot LP, Teixeira GP, Fahmy WM, Moreno CRC, Maia YCP, Crispim CA. Circadian misalignment measured by social jetlag from early to late pregnancy and its association with nutritional status: a longitudinal study. Sci Rep. 2021 Sep 21;11(1):18678. doi: 10.1038/s41598-021-97946-5.	1	837
23.4469	7.19688	24.2125	9.21249	28.1	France	0	Coelho et al	2022	Coelho J, Micoulaud-Franchi J-A, Wiet A-S, Nguyen D, Taillard J, Philip P. Circadian misalignment is associated with Covid-19 infection, Sleep Medicine, https://doi.org/10.1016/j.sleep.2022.03.015.	1	838
24.45	6.93333	24.7833	8.9	36.7	Japan	0	Shimura et al	2022	Shimura A, Yokoi K, Sugiura K, Higashi S, Inoue T. On workdays, earlier sleep for morningness and later wakeup for eveningness are associated with better work productivity. Sleep Med. 2022 Apr;92:73-80. doi: 10.1016/j.sleep.2022.03.007.	1	839
23.7083	6.85	23.8583	8.55	15.6	Croatia	0	Jurić et al	2022	Jurić P, Karuc J, Martinko A, Mišigoj-Duraković M, Sorić M. Does time of the day matter? Temporal associations between physical activity and quality and quantity of subsequent sleep in adolescents. Sleep Med. 2022 Apr;92:41-49. doi: 10.1016/j.sleep.2022.02.020.	1	840
22.5	6	23.25	7.5	29.9	USA	0	Zhao et al	2022	Zhao P, Bedrick BS, Brown KE, McCarthy R, Chubiz JE, Ju YS, Raghuraman N, Fay JC, Jungheim ES, Herzog ED, England SK. Sleep behavior and chronotype before and throughout pregnancy. Sleep Med. 2022 Jun;94:54-62. doi: 10.1016/j.sleep.2022.04.002.	1	841
22.2667	6.3	22.6	7.9	29.5	USA	2	Zhao et al	2022	Zhao P, Bedrick BS, Brown KE, McCarthy R, Chubiz JE, Ju YS, Raghuraman N, Fay JC, Jungheim ES, Herzog ED, England SK. Sleep behavior and chronotype before and throughout pregnancy. Sleep Med. 2022 Jun;94:54-62. doi: 10.1016/j.sleep.2022.04.002.	1	842
22.8	6.91667	25.05	10.4833	16.3	Israel	0	Orna & Efrat	2022	Orna T, Efrat B. Sleep Loss, Daytime Sleepiness, and Neurobehavioral Performance among Adolescents: A Field Study. Clocks Sleep. 2022 Mar 7;4(1):160-171. doi: 10.3390/clockssleep4010015.	1	843
23.7833	7.13333	25.1167	9.21667	16.3	Israel	2	Orna & Efrat	2022	Orna T, Efrat B. Sleep Loss, Daytime Sleepiness, and Neurobehavioral Performance among Adolescents: A Field Study. Clocks Sleep. 2022 Mar 7;4(1):160-171. doi: 10.3390/clockssleep4010015.	1	844
22.75	6.5	22.5	7.08333	56.5	USA	0	Arosemena et al	2022	Arosemena MA, Ramos AR, Marcus EN, Slota KA, Cheung J, Castillo PR. Primary hypothyroidism and chronotypes in adult women. BMC Res Notes. 2022 Feb 14;15(1):52. doi: 10.1186/s13104-022-05934-3.	1	845
24.15	7.63333	24.775	9.31667	23	Italy	0	Montagnese et al	2022	Montagnese S, Zarantonello L, Formentin C, Giusti G, Mangini C, Isherwood CM, Ferrari P, Paoli A, Mapelli D, Rizzuto R, Toppo S, Skene DJ, Vettor R, Costa R. A Circadian Hygiene Education Initiative Covering the Pre-pandemic and Pandemic Period Resulted in Earlier Get-Up Times in Italian University Students: An Ecological Study. Front Neurosci. 2022 Apr 14;16:848602. doi: 10.3389/fnins.2022.84860…	1	846
23.7408	7.2925	25.7258	9.57417	45.1	USA	0	Maghsoudipour et al	2022	Maghsoudipour M, Allison MA, Patel SR, Talavera GA, Daviglus M, Zee PC, Reid KJ, Makarem N, Malhotra A. Associations of chronotype and sleep patterns with metabolic syndrome in the Hispanic community health study/study of Latinos. Chronobiol Int. 2022 Aug;39(8):1087-1099. doi: 10.1080/07420528.2022.2069030.	1	847
24.1667	7.03333	24.7	9.01667	21.3	Japan	0	Tomishima et al	2022	Tomishima S, Komada Y, Tanioka K, Okajima I, Inoue Y. Prevalence and Factors Associated With the Risk of Delayed Sleep-Wake Phase Disorder in Japanese Youth. Front Psychiatry. 2022 May 13;13:878042. doi: 10.3389/fpsyt.2022.878042.	1	848
22.3167	7.11667	23.4	9.71667	14.4	France	0	Vulser et al	2022	Vulser H, Lemaître HS, Guldner S, Bezivin-Frère P, Löffler M, Sarvasmaa AS, Massicotte-Marquez J, Artiges E, Paillère Martinot ML, Filippi I, Miranda R, Stringaris A, van Noort BM, Penttilä J, Grimmer Y, Becker A, Banaschewski T, Bokde ALW, Desrivières S, Fröhner JH, Garavan H, Grigis A, Gowland PA, Heinz A, Papadopoulos Orfanos D, Poustka L, Smolka MN, Spechler PA, Walter H, Whelan R, Schumann G…	1	849
25.1667	8.48333	26.1	10.8833	20.6	Turkey	0	Onder et al	2022	Onder, I; Onder, AN; Yildirim, EG; - Burnout and engagement in university students: relationships with morningness-eveningness preferences, average sleep length and social jetlag.Biological Rhythm Research, 54:1, 70-85, DOI:10.1080/09291016.2022.2088662	1	850
24.1	9.18	25.47	10.62	12.8	Brasil	0	Anacleto et al	2022	Anacleto TS, Borgio JGF, Louzada FM. Daytime sleepiness in elementary school students: the role of sleep quality and chronotype. Rev Saude Publica. 2022 Jul 1;56:63. doi: 10.11606/s1518-8787.2021055004124.	1	851
23.5	7.56667	23.95	9.11667	20.9	France	0	Coelho et al	2022	Coelho J, Lopez R, Taillard J, D'Incau E, Fond G, Philip P, Micoulaud-Franchi JA. An Ultra-Short Measure of Excessive Daytime Sleepiness Is Related to Circadian Biological Rhythms: The French Psychometric Validation of the Barcelona Sleepiness Index. J Clin Med. 2022 Jul 4;11(13):3892. doi: 10.3390/jcm11133892.	1	852
23.3333	5.68333	25.3	9.58333	16	Brasil	0	Ferreira et al	2022	Ferreira LGF, Carvalho DAF, Alves FR, Bruin VMS, Bruin PFC. Asthma control, social jetlag, and sleep impairment in high school adolescents. Sleep Med. 2022 Nov;99:34-40. doi: 10.1016/j.sleep.2022.07.007.	1	853
23.7667	7.3	24.1	8.4	22.7	Japan	0	Hoshikawa	2022	Hoshikawa, M. (2022). Relationships between the Munich Chronotype questionnaire index and time at minimum core temperature. Biological Rhythm Research, 1. https://doi.org/10.1080/09291016.2022.2041797	1	854
23.5667	8.2	23.7167	8.63333	71.8	Spain	0	Bonmatí-Carrión et al	2022	Bonmatí-Carrión MÁ, Casado-Ramirez E, Moreno-Casbas MT, Campos M, ModulEN Consortium, Madrid JA, Rol MA. Living at the Wrong Time: Effects of Unmatching Official Time in Portugal and Western Spain. Biology (Basel). 2022 Jul 28;11(8):1130. doi: 10.3390/biology11081130.	1	855
22.7167	7.55	22.8	7.86667	72.1	Portugal	0	Bonmatí-Carrión et al	2022	Bonmatí-Carrión MÁ, Casado-Ramirez E, Moreno-Casbas MT, Campos M, ModulEN Consortium, Madrid JA, Rol MA. Living at the Wrong Time: Effects of Unmatching Official Time in Portugal and Western Spain. Biology (Basel). 2022 Jul 28;11(8):1130. doi: 10.3390/biology11081130.	1	856
23	6.66667	24	8	31.8	Malaysia	0	Chong et al	2022	Chong GY, Satvinder Kaur, Ruzita AT, Loy SL, Siah WY, Tan HY, et al. Translation, validation and reliability of the Malay version Chrononutrition Profile-Questionnaire (CPQ-M) in Malaysian adult populations. Biol Rhythm Res. 2022. https://doi.org/10.1080/09291016.2022.2105536.	1	857
23	6.63333	24	8	31.8	Malaysia	1	Chong et al	2022	Chong GY, Satvinder Kaur, Ruzita AT, Loy SL, Siah WY, Tan HY, et al. Translation, validation and reliability of the Malay version Chrononutrition Profile-Questionnaire (CPQ-M) in Malaysian adult populations. Biol Rhythm Res. 2022. https://doi.org/10.1080/09291016.2022.2105536.	1	858
23.9	6.5	24.25	8.15	37.2	Taiwan	0	Li et al	2022	Li TM, Pien LC, Cheng WJ. Direction and magnitude of social jetlag are associated with obesity: Results from a sample of hospital employees. Chronobiol Int. 2022 Sep;39(9):1242-1248. doi: 10.1080/07420528.2022.2090953.	1	859
22.2783	5.69168	23.0958	6.92647	62.7	Finland	2	Myllyntausta et al	2022	Myllyntausta S, Kronholm E, Pulakka A, Pentti J, Virtanen M, Stenholm S. Associations of Sleep and Individual Characteristics with Accelerometer-Measured Catch-Up Sleep among Older Employees. Sleep Epidemiology 2022.	1	860
23.4227	8.01067	24.1027	9.26392	13.8	Mexico	2	Zhang et al	2022	Zhang, Kelvin Pengyuan, Miatta Buxton, Yanelli R. Carmona, Karen E. Peterson, Yun Liu, Helen J. Burgess, Alejandra Cantoral, Martha María Tellez-Rojo, Libni A. Torres-Olascoaga, Laura Arboleda-Merino, Erica C. JansenDuration, timing, and consistency of sleep in relation to inflammatory cytokines in Mexican adolescents. Sleep Medicine, 2022, Vol: 100, Page: 103-111	1	861
23.9057	8.39425	24.4096	9.39042	15.8	Mexico	2	Zhang et al	2022	Zhang, Kelvin Pengyuan, Miatta Buxton, Yanelli R. Carmona, Karen E. Peterson, Yun Liu, Helen J. Burgess, Alejandra Cantoral, Martha María Tellez-Rojo, Libni A. Torres-Olascoaga, Laura Arboleda-Merino, Erica C. JansenDuration, timing, and consistency of sleep in relation to inflammatory cytokines in Mexican adolescents. Sleep Medicine, 2022, Vol: 100, Page: 103-111	1	862
22.8025	7.00412	23.1931	7.58938	28	Australia	0	Halson et al	2022	Halson SL, Johnston RD, Piromalli L, Lalor BJ, Cormack S, Roach GD, Sargent C. Sleep Regularity and Predictors of Sleep Efficiency and Sleep Duration in Elite Team Sport Athletes. Sports Med Open. 2022 Jun 17;8(1):79. doi: 10.1186/s40798-022-00470-7.	1	863
20.38	7.9	23.64	10.61	9	Brasil	0	Panjeh et al	2022	Panjeh S, Pompeia S, Cogo-Moreira H. Probing different aspects of short and ill-timed sleep in adolescents using the Morningness-Eveningness Scale for Children. Chronobiol Int. 2022 Mar;39(3):333-345. doi: 10.1080/07420528.2021.1998104	1	864
22.01	7.72	23.66	9.19	10	Brasil	0	Panjeh et al	2022	Panjeh S, Pompeia S, Cogo-Moreira H. Probing different aspects of short and ill-timed sleep in adolescents using the Morningness-Eveningness Scale for Children. Chronobiol Int. 2022 Mar;39(3):333-345. doi: 10.1080/07420528.2021.1998104	1	865
22.84	7.3	24.44	10.16	11	Brasil	0	Panjeh et al	2022	Panjeh S, Pompeia S, Cogo-Moreira H. Probing different aspects of short and ill-timed sleep in adolescents using the Morningness-Eveningness Scale for Children. Chronobiol Int. 2022 Mar;39(3):333-345. doi: 10.1080/07420528.2021.1998104	1	866
22.61	7.9	24.2	9.83	12	Brasil	0	Panjeh et al	2022	Panjeh S, Pompeia S, Cogo-Moreira H. Probing different aspects of short and ill-timed sleep in adolescents using the Morningness-Eveningness Scale for Children. Chronobiol Int. 2022 Mar;39(3):333-345. doi: 10.1080/07420528.2021.1998104	1	867
22.82	7.9	24.66	10.24	13	Brasil	0	Panjeh et al	2022	Panjeh S, Pompeia S, Cogo-Moreira H. Probing different aspects of short and ill-timed sleep in adolescents using the Morningness-Eveningness Scale for Children. Chronobiol Int. 2022 Mar;39(3):333-345. doi: 10.1080/07420528.2021.1998104	1	868
22.95	7.45	24.66	10.43	14	Brasil	0	Panjeh et al	2022	Panjeh S, Pompeia S, Cogo-Moreira H. Probing different aspects of short and ill-timed sleep in adolescents using the Morningness-Eveningness Scale for Children. Chronobiol Int. 2022 Mar;39(3):333-345. doi: 10.1080/07420528.2021.1998104	1	869
22.77	6.55	24.66	10.67	15	Brasil	0	Panjeh et al	2022	Panjeh S, Pompeia S, Cogo-Moreira H. Probing different aspects of short and ill-timed sleep in adolescents using the Morningness-Eveningness Scale for Children. Chronobiol Int. 2022 Mar;39(3):333-345. doi: 10.1080/07420528.2021.1998104	1	870
22	6.77	24.77	10.19	16	Brasil	0	Panjeh et al	2022	Panjeh S, Pompeia S, Cogo-Moreira H. Probing different aspects of short and ill-timed sleep in adolescents using the Morningness-Eveningness Scale for Children. Chronobiol Int. 2022 Mar;39(3):333-345. doi: 10.1080/07420528.2021.1998104	1	871
22.94	7.5	24.5	9.72	17	Brasil	0	Panjeh et al	2022	Panjeh S, Pompeia S, Cogo-Moreira H. Probing different aspects of short and ill-timed sleep in adolescents using the Morningness-Eveningness Scale for Children. Chronobiol Int. 2022 Mar;39(3):333-345. doi: 10.1080/07420528.2021.1998104	1	872
22.8167	6.98333	24.35	8.88333	14.6	Russia	0	Borisenkov et al	2022	Borisenkov MF, Popov SV, Smirnov VV, Dorogina OI, Pechеrkina AA, Symaniuk EE. Later school start time is associated with better academic performance, sleep-wake rhythm characteristics, and eating behavior. Chronobiol Int. 2022 Aug 31:1-10. doi: 10.1080/07420528.2022.2117050.	1	873
21.6433	5.24333	22.05	6.51667	15.7	Germany	1	Kullik et al	2022	Kullik L, Kellmann M, Puta C, Jakowski S. Sleep behavior and training load in adolescent elite basketball players during COVID-19 pandemic development. Chronobiol Int. 2022 Aug 29:1-11. doi: 10.1080/07420528.2022.2117051.	1	874
21.9	6.7	23.2667	9.36667	13.5	USA	0	Hasler et al	2022	Hasler BP, Graves JL, Wallace ML, Claudatos S, Franzen PL, Nooner KB, Brown SA, Tapert SF, Baker FC, Clark DB. Self-reported sleep and circadian characteristics predict alcohol and cannabis use: A longitudinal analysis of the National Consortium on Alcohol and Neurodevelopment in Adolescence Study. Alcohol Clin Exp Res. 2022 May;46(5):848-860. doi: 10.1111/acer.14808.	1	875
22.7	6.5	24	9.6	16.5	USA	0	Hasler et al	2022	Hasler BP, Graves JL, Wallace ML, Claudatos S, Franzen PL, Nooner KB, Brown SA, Tapert SF, Baker FC, Clark DB. Self-reported sleep and circadian characteristics predict alcohol and cannabis use: A longitudinal analysis of the National Consortium on Alcohol and Neurodevelopment in Adolescence Study. Alcohol Clin Exp Res. 2022 May;46(5):848-860. doi: 10.1111/acer.14808.	1	876
23.65	7.55	24.85	9.75	19.6	USA	0	Hasler et al	2022	Hasler BP, Graves JL, Wallace ML, Claudatos S, Franzen PL, Nooner KB, Brown SA, Tapert SF, Baker FC, Clark DB. Self-reported sleep and circadian characteristics predict alcohol and cannabis use: A longitudinal analysis of the National Consortium on Alcohol and Neurodevelopment in Adolescence Study. Alcohol Clin Exp Res. 2022 May;46(5):848-860. doi: 10.1111/acer.14808.	1	877
23.3833	7.21667	24.9167	10.2833	14.8	Spain	0	Díaz-Morales & Puig-Navarro	2022	Díaz-Morales JF, Puig-Navarro Y. The psychometric properties of the Spanish version of the Morningness-Eveningness Stability Scale improved (MESSi) in adolescents. Chronobiol Int. 2022 Aug 29:1-8. doi: 10.1080/07420528.2022.2115378.	1	878
20.5167	6.75	21.1833	7.78333	8.5	USA	0	Hassinger et al.	2022	Hassinger, Amanda B, Alberto Monegro, Geovanny Perez et al. Sleep patterns and screen time in US school children during the first 6 months of the COVID-19 pandemic, 14 February 2022, PREPRINT (Version 1) available at Research Square [https://doi.org/10.21203/rs.3.rs-1320546/v1]	1	879
22.9	7.28333	23.4167	8.25	13.4	Canada	1	Gruber et al.	2022	Gruber R, Gauthier-Gagne G, Voutou D, Somerville G, Saha S, Boursier J. Pre-pandemic sleep behavior and adolescents' stress during Covid-19: a prospective longitudinal study. Child Adolesc Psychiatry Ment Health. 2021 Aug 30;15(1):43. doi: 10.1186/s13034-021-00399-x.	1	880
22.5167	7.41667	23.2833	8.05	13.4	Canada	0	Gruber et al.	2022	Gruber R, Gauthier-Gagne G, Voutou D, Somerville G, Saha S, Boursier J. Pre-pandemic sleep behavior and adolescents' stress during Covid-19: a prospective longitudinal study. Child Adolesc Psychiatry Ment Health. 2021 Aug 30;15(1):43. doi: 10.1186/s13034-021-00399-x.	1	881
22.9104	7.04783	23.3448	8.171	48.6	France	0	Barateau et al.	2022	Barateau L, Chenini S, Rassu AL, Denis C, Lorber Q, Dhalluin C, Lopez R, Jaussent I, Beziat S, Dauvilliers Y. Changes in Sleep Pattern During the COVID-19 Lockdown in Patients With Narcolepsy, Idiopathic Hypersomnia, and Restless Legs Syndrome. Neurology. 2022 Aug 2:10.1212/WNL.0000000000200907. doi: 10.1212/WNL.0000000000200907.	1	882
24.3533	7.48	24.975	8.875	25	World	1	Yuan et al.	2022	Yuan RK, Zitting KM, Maskati L, Huang J. Increased sleep duration and delayed sleep timing during the COVID-19 pandemic. Sci Rep. 2022 Jun 29;12(1):10937. doi: 10.1038/s41598-022-14782-x.	1	883
22.3833	6.33333	24.3833	9.53333	15.6	Germany	0	Preckel et al.	2020	Preckel, F., Fischbach, A., Scherrer, V., Brunner, M., Ugen, S., Lipnevich, A. A., & Roberts, R. D. (2020). Circadian preference as a typology: Latent-class analysis of adolescents' morningness/eveningness, relation with sleep behavior, and with academic outcomes. Learning and Individual Differences, 78, 101725. https://doi.org/10.1016/j.lindif.2019.03.007	1	884
24.1	7.46667	24.4333	8.81667	19.9	China	0	Wang et al.	2022	Wang J, Liu S, Guo J, Xiao R, Yu J, Luo X, Xu Y, Zhao Y, Cui Y, Gu Y, Cai L, Zhang B. Chronotypes, Sleep and Mental Distress Among Chinese College Students: A Cross-Sectional Study. Front Psychiatry. 2022 May 26;13:883484. doi: 10.3389/fpsyt.2022.883484.	1	885
23.65	7.28333	24.4	8.96667	26	Norway	0	Saxvig et al.	2023	Saxvig IW, Bjorvatn B, Waage S. Habitual Sleep Patterns and Chronic Sleep Problems in Relation to Sex, Age, and Circadian Preference in a Population-Based Sample of Norwegian Adults. Clocks Sleep. 2023 Jan 6;5(1):21-33. doi: 10.3390/clockssleep5010003.	1	886
23.7667	6.96667	24.4167	8.41667	43	Norway	0	Saxvig et al.	2023	Saxvig IW, Bjorvatn B, Waage S. Habitual Sleep Patterns and Chronic Sleep Problems in Relation to Sex, Age, and Circadian Preference in a Population-Based Sample of Norwegian Adults. Clocks Sleep. 2023 Jan 6;5(1):21-33. doi: 10.3390/clockssleep5010003.	1	887
23.7333	6.91667	24.2333	7.8	58	Norway	0	Saxvig et al.	2023	Saxvig IW, Bjorvatn B, Waage S. Habitual Sleep Patterns and Chronic Sleep Problems in Relation to Sex, Age, and Circadian Preference in a Population-Based Sample of Norwegian Adults. Clocks Sleep. 2023 Jan 6;5(1):21-33. doi: 10.3390/clockssleep5010003.	1	888
23.8167	7.06667	24.0333	7.38333	71	Norway	0	Saxvig et al.	2023	Saxvig IW, Bjorvatn B, Waage S. Habitual Sleep Patterns and Chronic Sleep Problems in Relation to Sex, Age, and Circadian Preference in a Population-Based Sample of Norwegian Adults. Clocks Sleep. 2023 Jan 6;5(1):21-33. doi: 10.3390/clockssleep5010003.	1	889
23.9833	7.28333	24.1333	7.63333	20	China	0	Wan et al.	2023	Wan Z, Xiao L, Wang G. The evening type was associated with higher levels of depression during the school day but not during the summer vacation. Research Square; 2023. DOI: 10.21203/rs.3.rs-2597759/v1	1	890
21.3333	6.68333	21.6667	7.71667	10.2	China	0	Yang et al.	2023	Yang Y, Li S, Zhang Y, et al. Chronotype is associated with eating behaviors, physical activity and overweight in school-aged children. Research Square; 2023. DOI: 10.21203/rs.3.rs-2858406/v1.	1	891
24.2833	8.03333	25.8167	10.2167	35	Italy	0	Fabbri et al.	2023	Fabbri, M. Mindfulness, Subjective Cognitive Functioning, Sleep Timing and Time Expansion during COVID-19 Lockdown: A Longitudinal Study in Italy. Clocks&Sleep 2023, 5, 313–332. https://doi.org/10.3390/clockssleep5020024	1	892
24.0167	6.5	24.45	8.5	15.9	USA	2	Rynders et al.	2022	Rynders CA, Bowen AE, Cooper E, Brinton JT, Higgins J, Nadeau KJ, Wright KP Jr, Simon SL. A Naturalistic Actigraphic Assessment of Changes in Adolescent Sleep, Light Exposure, and Activity Before and During COVID-19. J Biol Rhythms. 2022 Dec;37(6):690-699. doi: 10.1177/07487304221123455.	1	893
24.3667	7.1	25.2	10.1167	18.9	Russia	0	Borisenkov et al.	2022	Borisenkov M.F., Popov S.V., Smirnov V.V., Gubin D.G., Petrov I.M., Vasilkova T.N., Solovieva S.V., Martinson E.A., Pecherkina A.A., Dorogina O.I., Symaniuk E.E. Associations among sleep-wake rhythm characteristics, time perspective and psycho-emotional state during COVID-19 isolation // Biological Rhythm Research. 2022, 53 (11): 1770–1781. DOI: 10.1080/09291016.2022.2041289	1	894
22.4	6	23.5	8.2	31	Austria	0	Vollmer, Jankowski	2022	Vollmer C, Jankowski KS. COVID-19-lockdown delayed sleep timing in Tyrolean teachers. Chronobiol Int. 2022 Dec;39(12):1601-1610. doi: 10.1080/07420528.2022.2138424.	1	895
22.55	5.97	23.2	7.77	47	Austria	0	Vollmer, Jankowski	2022	Vollmer C, Jankowski KS. COVID-19-lockdown delayed sleep timing in Tyrolean teachers. Chronobiol Int. 2022 Dec;39(12):1601-1610. doi: 10.1080/07420528.2022.2138424.	1	896
22.7	6.05	23.27	7.2	61	Austria	0	Vollmer, Jankowski	2022	Vollmer C, Jankowski KS. COVID-19-lockdown delayed sleep timing in Tyrolean teachers. Chronobiol Int. 2022 Dec;39(12):1601-1610. doi: 10.1080/07420528.2022.2138424.	1	897
22.4071	7.60887	23.7231	9.69632	13.6	Spain	0	Moraleda-Cibrián et al.	2022	Moraleda-Cibrián M, Albares-Tendero J, Pin-Arboledas G. Screen media use and sleep patterns in Spanish adolescents during the lockdown of the coronavirus pandemic. Sleep Breath. 2022 Dec;26(4):1993-2000. doi: 10.1007/s11325-021-02558-y.	1	898
25.3608	8.9725	25.6008	9.76583	25	Israel	0	Lan et al.	2022	Lan A, Kotler D, Kronfeld-Schor N, Stukalin Y, Einat H. Changes in sleep patterns of college students in Israel during COVID-19 lockdown, a sleep diaries study. Sleep Biol Rhythms. 2022;20(2):309-314. doi: 10.1007/s41105-021-00371-4.	1	899
22	6.5	22.5	7.25	45	New Zealand	0	Gibson et al.	2022	Gibson R, Shetty H, Carter M, Münch M. Sleeping in a bubble: factors affecting sleep during New Zealand's COVID-19 lockdown. Sleep Adv. 2022 May 16;3(1):zpac017. doi: 10.1093/sleepadvances/zpac017.	1	900
24	6.63667	24.0008	8.7625	14.9	Korea	0	Han et al.	2023	Han CH, Lee S, Chung JH. Association between COVID-19 lockdown and sleep behaviors in Korean adolescents. Medicine (Baltimore). 2023 May 26;102(21):e33809. doi: 10.1097/MD.0000000000033809.	1	901
23.1667	5.58333	25.0667	9.63333	14.5	USA	0	Bryan et al.	2023	Bryan CS, Weingart R, Lindsey A, Hale L, Johnson DA, Gazmararian JA. Impact of School Start Time Delays and Learning Modality on Sleep Timing and Duration During COVID-19. Behav Sleep Med. 2023 Jun 1:1-11. doi: 10.1080/15402002.2023.2217974.	1	902
25.0667	6.98333	25	8.91667	20	Japan	0	Kayaba et al.	2023	Kayaba M, Ishitsuka M, Ishidate M, Ueno K, Kajihara Y, Sasai-Sakuma T. Delayed sleep-wake rhythm due to staying at home during the COVID-19 pandemic and sleep debt after returning to campus among Japanese nursing university students: A longitudinal study. Heliyon. 2023 Apr;9(4):e14994. doi: 10.1016/j.heliyon.2023.e14994	1	903
24.75	8.06667	25.2	9.3	23.4	USA	2	Rice et al.	2023	Rice A, Sather O, Wright KP, Vetter C, Martin MA, de la Iglesia HO. COVID-19 Stay-at-Home Restrictions Increase the Alignment in Sleep and Light Exposure between School Days and Weekends in University Students. Sleep. 2023 Mar 8:zsad059. doi: 10.1093/sleep/zsad059.	1	904
23.65	6.31667	26.0667	11.3	13.5	Argentina	0	Rodríguez Ferrante et al.	2023	Rodríguez Ferrante G, Goldin AP, Sigman M, Leone MJ. A better alignment between chronotype and school timing is associated with lower grade retention in adolescents. NPJ Sci Learn. 2023 Jun 21;8(1):21. doi: 10.1038/s41539-023-00171-0.	1	905
24.6333	6.41667	26.3667	11.5	17.6	Argentina	0	Rodríguez Ferrante et al.	2023	Rodríguez Ferrante G, Goldin AP, Sigman M, Leone MJ. A better alignment between chronotype and school timing is associated with lower grade retention in adolescents. NPJ Sci Learn. 2023 Jun 21;8(1):21. doi: 10.1038/s41539-023-00171-0.	1	906
21.85	6.03333	23.2833	9.23333	10	Mexico	0	Arrona-Palacios et al.	2023	Arrona-Palacios A, Díaz-Morales JF, Duffy JF. The influence of a permanent double-shift school start time on adolescent sleep and chronotype across different age groups. Chronobiol Int. 2023 May 22:1-14. doi: 10.1080/07420528.2023.2215343.	1	907
21.8167	6.13333	23.4	9.36667	11	Mexico	0	Arrona-Palacios et al.	2023	Arrona-Palacios A, Díaz-Morales JF, Duffy JF. The influence of a permanent double-shift school start time on adolescent sleep and chronotype across different age groups. Chronobiol Int. 2023 May 22:1-14. doi: 10.1080/07420528.2023.2215343.	1	908
22.0667	7.65	24.0667	10.1	12	Mexico	0	Arrona-Palacios et al.	2023	Arrona-Palacios A, Díaz-Morales JF, Duffy JF. The influence of a permanent double-shift school start time on adolescent sleep and chronotype across different age groups. Chronobiol Int. 2023 May 22:1-14. doi: 10.1080/07420528.2023.2215343.	1	909
22.9833	6.18333	24.25	10.2833	13	Mexico	0	Arrona-Palacios et al.	2023	Arrona-Palacios A, Díaz-Morales JF, Duffy JF. The influence of a permanent double-shift school start time on adolescent sleep and chronotype across different age groups. Chronobiol Int. 2023 May 22:1-14. doi: 10.1080/07420528.2023.2215343.	1	910
22.9833	6.18333	24.25	10.2833	14	Mexico	0	Arrona-Palacios et al.	2023	Arrona-Palacios A, Díaz-Morales JF, Duffy JF. The influence of a permanent double-shift school start time on adolescent sleep and chronotype across different age groups. Chronobiol Int. 2023 May 22:1-14. doi: 10.1080/07420528.2023.2215343.	1	911
22.95	5.88333	24.5667	10.2167	15	Mexico	0	Arrona-Palacios et al.	2023	Arrona-Palacios A, Díaz-Morales JF, Duffy JF. The influence of a permanent double-shift school start time on adolescent sleep and chronotype across different age groups. Chronobiol Int. 2023 May 22:1-14. doi: 10.1080/07420528.2023.2215343.	1	912
23.0333	5.48333	24.3333	9.46667	16	Mexico	0	Arrona-Palacios et al.	2023	Arrona-Palacios A, Díaz-Morales JF, Duffy JF. The influence of a permanent double-shift school start time on adolescent sleep and chronotype across different age groups. Chronobiol Int. 2023 May 22:1-14. doi: 10.1080/07420528.2023.2215343.	1	913
23.0833	5.56667	24.4833	9.6	17	Mexico	0	Arrona-Palacios et al.	2023	Arrona-Palacios A, Díaz-Morales JF, Duffy JF. The influence of a permanent double-shift school start time on adolescent sleep and chronotype across different age groups. Chronobiol Int. 2023 May 22:1-14. doi: 10.1080/07420528.2023.2215343.	1	914
23.0167	5.68333	24.2333	9.53333	18	Mexico	0	Arrona-Palacios et al.	2023	Arrona-Palacios A, Díaz-Morales JF, Duffy JF. The influence of a permanent double-shift school start time on adolescent sleep and chronotype across different age groups. Chronobiol Int. 2023 May 22:1-14. doi: 10.1080/07420528.2023.2215343.	1	915
23.1167	6.08333	24.45	9.68333	19	Mexico	0	Arrona-Palacios et al.	2023	Arrona-Palacios A, Díaz-Morales JF, Duffy JF. The influence of a permanent double-shift school start time on adolescent sleep and chronotype across different age groups. Chronobiol Int. 2023 May 22:1-14. doi: 10.1080/07420528.2023.2215343.	1	916
23.4167	6.38333	24.8	9.33333	20	Mexico	0	Arrona-Palacios et al.	2023	Arrona-Palacios A, Díaz-Morales JF, Duffy JF. The influence of a permanent double-shift school start time on adolescent sleep and chronotype across different age groups. Chronobiol Int. 2023 May 22:1-14. doi: 10.1080/07420528.2023.2215343.	1	917
23.1333	5.91667	24.1333	9	21	Mexico	0	Arrona-Palacios et al.	2023	Arrona-Palacios A, Díaz-Morales JF, Duffy JF. The influence of a permanent double-shift school start time on adolescent sleep and chronotype across different age groups. Chronobiol Int. 2023 May 22:1-14. doi: 10.1080/07420528.2023.2215343.	1	918
23.5667	6.3	24.1167	8.8	22	Mexico	0	Arrona-Palacios et al.	2023	Arrona-Palacios A, Díaz-Morales JF, Duffy JF. The influence of a permanent double-shift school start time on adolescent sleep and chronotype across different age groups. Chronobiol Int. 2023 May 22:1-14. doi: 10.1080/07420528.2023.2215343.	1	919
22.1667	7.96667	22.5833	8.65	5	Hong Kong	0	Wong et al.	2023	Wong OY, Au CT, Yuen HM, Yu KN, Lan QY, Chan NY, Tsang CC, Li AM, Chan KC. Impact of COVID-19 on the sleep-wake patterns of preschool children. Sleep Med. 2023 Jan;101:50-57. doi: 10.1016/j.sleep.2022.10.012.	1	920
23.95	7.33333	24.3167	8.86667	40	Hong Kong	0	Wong et al.	2023	Wong OY, Au CT, Yuen HM, Yu KN, Lan QY, Chan NY, Tsang CC, Li AM, Chan KC. Impact of COVID-19 on the sleep-wake patterns of preschool children. Sleep Med. 2023 Jan;101:50-57. doi: 10.1016/j.sleep.2022.10.012.	1	921
23.5833	7.23333	23.8833	8.45	35	Hong Kong	0	Wong et al.	2023	Wong OY, Au CT, Yuen HM, Yu KN, Lan QY, Chan NY, Tsang CC, Li AM, Chan KC. Impact of COVID-19 on the sleep-wake patterns of preschool children. Sleep Med. 2023 Jan;101:50-57. doi: 10.1016/j.sleep.2022.10.012.	1	922
23.4667	7.08333	24.35	8.28333	30.3	Germany	1	Staller et al.	2023	Staller, N., Quante, M., Deutsch, H., Randler C. Onsite versus home-office: differences in sleep patterns according to workplace. Somnologie (2023). https://doi.org/10.1007/s11818-023-00408-5	1	923
24.25	7.73333	24.75	8.78333	25.8	Germany	1	Staller et al.	2023	Staller, N., Quante, M., Deutsch, H., Randler C. Onsite versus home-office: differences in sleep patterns according to workplace. Somnologie (2023). https://doi.org/10.1007/s11818-023-00408-5	1	924
27.15	10.1	28	11.85	34.5	Portugal	0	Reis et al.	2023	Reis C, Pilz LK, Kramer A, Lopes LV, Paiva T, Roenneberg T. The impact of daylight-saving time (DST) on patients with delayed sleep-wake phase disorder (DSWPD). J Pineal Res. 2023 May;74(4):e12867. doi: 10.1111/jpi.12867.	1	925
22.1583	7.95833	22.5833	8.79167	3.9	Hong Kong	0	Lan et al.	2023	Lan QY, Chan KC, Au CT, Chan PH, Chan NY, Wing YK, Li AM, Lam HS. Secular trends of sleep-wake patterns in Hong Kong preschoolers. Sleep Med. 2023 Apr;104:73-82. doi: 10.1016/j.sleep.2023.02.018.	1	926
22.56	6.04	22.825	7.06667	50	Canada	2	Jalali et al.	2022	Jalali N, Sahu KS, Oetomo A, Morita PP. Usability of Smart Home Thermostat to Evaluate the Impact of Weekdays and Seasons on Sleep Patterns and Indoor Stay: Observational Study. JMIR Mhealth Uhealth. 2022 Apr 1;10(4):e28811. doi: 10.2196/28811.	1	927
22.05	6.44167	22.3667	7.4	9.5	Japan	0	Shinto et al.	2022	Shinto T, Tahara Y, Watabe A, Makino N, Tomonaga M, Kimura H, Nozawa Y, Kobayashi K, Takahashi M, Shibata S. Interaction effects of sex on the sleep loss and social jetlag-related negative mood in Japanese children and adolescents: a cross-sectional study. Sleep Adv. 2022 Sep 21;3(1):zpac035. doi: 10.1093/sleepadvances/zpac035.	1	928
22.9917	6.48333	23.325	8.1	13.5	Japan	0	Shinto et al.	2022	Shinto T, Tahara Y, Watabe A, Makino N, Tomonaga M, Kimura H, Nozawa Y, Kobayashi K, Takahashi M, Shibata S. Interaction effects of sex on the sleep loss and social jetlag-related negative mood in Japanese children and adolescents: a cross-sectional study. Sleep Adv. 2022 Sep 21;3(1):zpac035. doi: 10.1093/sleepadvances/zpac035.	1	929
23.7417	6.4	24.1083	8.49167	17.5	Japan	0	Shinto et al.	2022	Shinto T, Tahara Y, Watabe A, Makino N, Tomonaga M, Kimura H, Nozawa Y, Kobayashi K, Takahashi M, Shibata S. Interaction effects of sex on the sleep loss and social jetlag-related negative mood in Japanese children and adolescents: a cross-sectional study. Sleep Adv. 2022 Sep 21;3(1):zpac035. doi: 10.1093/sleepadvances/zpac035.	1	930
22.2	6.21667	22.4667	8.23333	15	China	0	Long et al.	2022	Long Z, Zhao A, Chen Y, Li R, Xia Y, Guo Y, Li S. The associations of chronotype and social jetlag with prosocial behavior problems among Chinese adolescents. Chronobiol Int. 2022 Nov;39(11):1498-1507. doi: 10.1080/07420528.2022.2127362.	1	931
23.7833	7.51667	24.6667	9.85	21	France	0	Vast et al.	2022	Vast, D., Ribeiro, N., Gounden, Y., and Quaglino, V. Le sommeil des étudiants français en période de COVID-19 : Influence des deux premiers confinements sur la quantité et la qualité de sommeil [Sleep of French college students during COVID-19: Influence of the first two lockdowns on sleep quantity and sleep quality]. Psychologie française September 2022 67(3):317-333, doi.org/10.1016/j.psfr.2022…	1	932
23.2833	7.46667	24.2167	8.33333	20.4	France	0	Vast et al.	2022	Vast, D., Ribeiro, N., Gounden, Y., and Quaglino, V. Le sommeil des étudiants français en période de COVID-19 : Influence des deux premiers confinements sur la quantité et la qualité de sommeil [Sleep of French college students during COVID-19: Influence of the first two lockdowns on sleep quantity and sleep quality]. Psychologie française September 2022 67(3):317-333, doi.org/10.1016/j.psfr.2022…	1	933
23.3333	6.76667	24.1833	10.1667	14.8	Hong Kong	0	Chen et al.	2022	Chen CX, Li TMH, Zhang J, Li SX, Yu MWM, Tsang CC, Chan KCC, Au CT, Li AM, Kong APS, Chan JWY, Wing YK, Chan NY. The impact of sleep-corrected social jetlag on mental health, behavioral problems, and daytime sleepiness in adolescents. Sleep Med. 2022 Dec;100:494-500. doi: 10.1016/j.sleep.2022.09.027.	1	934
23.8167	6.55	24.6	8.93333	15.9	Singapore	2	Pu et al.	2022	Pu Z, Leong RLF, Chee MWL, Massar SAA. Bedtime procrastination and chronotype differentially predict adolescent sleep on school nights and non-school nights. Sleep Health. 2022 Dec;8(6):640-647. doi: 10.1016/j.sleh.2022.09.007.	1	935
24.3333	7.43333	25.6667	10.1667	15.8	Iceland	2	Hrafnkelsdottir et al.	2020	Hrafnkelsdottir SM, Brychta RJ, Rognvaldsdottir V, Chen KY, Johannsson E, Gudmundsdottir SL, Arngrimsson SA. Less screen time and more physical activity is associated with more stable sleep patterns among Icelandic adolescents. Sleep Health. 2020 Oct;6(5):609-617. doi: 10.1016/j.sleh.2020.02.005.	1	936
21.5667	6.38333	21.55	7.01667	10.2	Japan	1	Minatoya et al.	2023	Minatoya Y., Shikano A., Tanabe K& Noi S (2023) The relationship between light exposure and bedtime/wake-up time during school days, holidays and long-stay camp period in Japanese children, Biological Rhythm Research, 54:3, 276-290, DOI: 10.1080/09291016.2022.2151775	1	937
21.4333	6.83333	22.75	8.86667	11.3	France	0	Eichenlaub et al.	2023	Eichenlaub JB, Pinelli M, Portrat S. Sleep habits and their relation to self-reported attention and class climate in preteens. Sleep Med. 2023 Jan;101:421-428. doi: 10.1016/j.sleep.2022.11.032.	1	938
23.2333	6.33333	23.9167	7.93333	43.3	Sweden	2	Beute et al.	2022	Beute F, Lowden A, Aries M. The relationship of light exposure to sleep outcomes among office workers. Part 2: Comparison of days with and without social constraints. Lighting Research & Technology. 2022;0(0). doi:10.1177/14771535221136099	1	939
24.9208	7.8625	25.575	9.33333	23	USA	2	Dunster et al.	2023	Dunster GP, Hua I, Grahe A, Fleischer JG, Panda S, Wright KP Jr, Vetter C, Doherty JH, de la Iglesia HO. Daytime light exposure is a strong predictor of seasonal variation in sleep and circadian timing of university students. J Pineal Res. 2023 Mar;74(2):e12843. doi: 10.1111/jpi.12843.	1	940
22.1	6.69583	22.775	7.99583	13.2	Australia	0	Reardon et al.	2023	Reardon A, Lushington K, Agostini A. Adolescent sleep, distress, and technology use: weekday versus weekend. Child Adolesc Ment Health. 2023 Feb;28(1):108-116. doi: 10.1111/camh.12616.	1	941
23.0333	7.2875	23.75	8.33333	15.8	Australia	0	Reardon et al.	2023	Reardon A, Lushington K, Agostini A. Adolescent sleep, distress, and technology use: weekday versus weekend. Child Adolesc Ment Health. 2023 Feb;28(1):108-116. doi: 10.1111/camh.12616.	1	942
23.05	6.86667	24.0167	9.1	16	USA	2	Simon et al.	2019	Simon SL, Behn CD, Cree-Green M, Kaar JL, Pyle L, Hawkins SMM, Rahat H, Garcia-Reyes Y, Wright KP Jr, Nadeau KJ. Too Late and Not Enough: School Year Sleep Duration, Timing, and Circadian Misalignment Are Associated with Reduced Insulin Sensitivity in Adolescents with Overweight/Obesity. J Pediatr. 2019 Feb;205:257-264.e1. doi: 10.1016/j.jpeds.2018.10.027.	1	943
23.6167	7.78333	24.1667	8.95	17.2	Australia	2	Hand et al.	2023	Hand AJ, Stone JE, Shen L, Vetter C, Cain SW, Bei B, Phillips AJK. Measuring Light Regularity: Sleep Regularity is Associated with Regularity of Light Exposure in Adolescents. Sleep. 2023 Jan 10:zsad001. doi: 10.1093/sleep/zsad001.	1	944
21.5833	6.3	22.5167	8.36667	9	Singapore	0	Koa et al.	2023	Koa TB, Seah JX, Ong JQW, Lo JC. Short Sleep Duration in School-Age Children: Differential Factors on Weekdays and Weekends. Behav Sleep Med. 2023 Jan 3:1-13. doi: 10.1080/15402002.2022.2164001.	1	945
23.4167	6.38333	25.2333	8.13333	39.7	Singapore	0	Koa et al.	2023	Koa TB, Seah JX, Ong JQW, Lo JC. Short Sleep Duration in School-Age Children: Differential Factors on Weekdays and Weekends. Behav Sleep Med. 2023 Jan 3:1-13. doi: 10.1080/15402002.2022.2164001.	1	946
23.6833	6.6	24.2667	8.23333	39.7	Singapore	0	Koa et al.	2023	Koa TB, Seah JX, Ong JQW, Lo JC. Short Sleep Duration in School-Age Children: Differential Factors on Weekdays and Weekends. Behav Sleep Med. 2023 Jan 3:1-13. doi: 10.1080/15402002.2022.2164001.	1	947
23.4333	6.75	24.5167	9.58333	15.6	Italy	2	Bacaro et al.	2023	Bacaro V, Andreose A, Grimaldi M, Natale V, Tonetti L, Crocetti E. The Association between Sleep Patterns, Educational Identity, and School Performance in Adolescents. Brain Sci. 2023 Jan 20;13(2):178. doi: 10.3390/brainsci13020178.	1	948
23.8	7.11667	24.2479	8.34792	15	Korea	0	Jang et al.	2023	Jang Y, Jun JS, Jung KY. Trends in sleep duration in Korea: The Korean time use survey. Sleep Med. 2023 Mar;103:24-28. doi: 10.1016/j.sleep.2023.01.025.	1	949
24.3542	7.4875	24.8104	8.45833	25	Korea	0	Jang et al.	2023	Jang Y, Jun JS, Jung KY. Trends in sleep duration in Korea: The Korean time use survey. Sleep Med. 2023 Mar;103:24-28. doi: 10.1016/j.sleep.2023.01.025.	1	950
23.8792	6.9125	24.1458	7.55	35	Korea	0	Jang et al.	2023	Jang Y, Jun JS, Jung KY. Trends in sleep duration in Korea: The Korean time use survey. Sleep Med. 2023 Mar;103:24-28. doi: 10.1016/j.sleep.2023.01.025.	1	951
23.7542	7.04167	23.8771	7.55	45	Korea	0	Jang et al.	2023	Jang Y, Jun JS, Jung KY. Trends in sleep duration in Korea: The Korean time use survey. Sleep Med. 2023 Mar;103:24-28. doi: 10.1016/j.sleep.2023.01.025.	1	952
23.5333	6.275	23.5458	6.44167	55	Korea	0	Jang et al.	2023	Jang Y, Jun JS, Jung KY. Trends in sleep duration in Korea: The Korean time use survey. Sleep Med. 2023 Mar;103:24-28. doi: 10.1016/j.sleep.2023.01.025.	1	953
23.2542	5.94167	23.2646	6.02917	65	Korea	0	Jang et al.	2023	Jang Y, Jun JS, Jung KY. Trends in sleep duration in Korea: The Korean time use survey. Sleep Med. 2023 Mar;103:24-28. doi: 10.1016/j.sleep.2023.01.025.	1	954
23.1292	5.925	23.0979	5.91667	75	Korea	0	Jang et al.	2023	Jang Y, Jun JS, Jung KY. Trends in sleep duration in Korea: The Korean time use survey. Sleep Med. 2023 Mar;103:24-28. doi: 10.1016/j.sleep.2023.01.025.	1	955
24.0667	7.06667	26.1667	9.81667	22.6	Uruguay	2	Estevan et al.	2023	Estevan, I.; Coirolo, N.; Tassino, B.; Silva, A. The Influence of Light and Physical Activity on the Timing and Duration of Sleep: Insights from a Natural Model of Dance Training in Shifts. Clocks&Sleep 2023, 5, 47–61. https://doi.org/10.3390/clockssleep5010006	1	956
23.125	6.525	25	7.88333	31.8	Malaysia	0	Chong et al.	2022	Chong GY, Satvinder Kaur, Ruzita AT, Loy SL, Siah WY, Tan HY, et al. Translation, validation and reliability of the Malay version Chrononutrition Profile-Questionnaire (CPQ-M) in Malaysian adult populations. Biol Rhythm Res. 2022. https://doi.org/10.1080/09291016.2022.2105536.	1	957
21.7208	6.82833	23.2875	9.65	13	Belgium	0	Boniel-Nissim et al.	2023	Boniel-Nissim M, Tynjälä J, Gobiņa I, Furstova J, van den Eijnden RJJM, Marino C, Klanšček HJ, Klavina-Makrecka S, Villeruša A, Lahti H, Vieno A, Wong SL, Villberg J, Inchley J, Gariépy G. Adolescent use of social media and associations with sleep patterns across 18 European and North American countries. Sleep Health. 2023 Jun;9(3):314-321. doi: 10.1016/j.sleh.2023.01.005.	1	958
22.4458	6.91833	24.0375	9.69	13	Canada	0	Boniel-Nissim et al.	2023	Boniel-Nissim M, Tynjälä J, Gobiņa I, Furstova J, van den Eijnden RJJM, Marino C, Klanšček HJ, Klavina-Makrecka S, Villeruša A, Lahti H, Vieno A, Wong SL, Villberg J, Inchley J, Gariépy G. Adolescent use of social media and associations with sleep patterns across 18 European and North American countries. Sleep Health. 2023 Jun;9(3):314-321. doi: 10.1016/j.sleh.2023.01.005.	1	959
22.425	6.445	23.9708	9.49833	13	Czech Republic	0	Boniel-Nissim et al.	2023	Boniel-Nissim M, Tynjälä J, Gobiņa I, Furstova J, van den Eijnden RJJM, Marino C, Klanšček HJ, Klavina-Makrecka S, Villeruša A, Lahti H, Vieno A, Wong SL, Villberg J, Inchley J, Gariépy G. Adolescent use of social media and associations with sleep patterns across 18 European and North American countries. Sleep Health. 2023 Jun;9(3):314-321. doi: 10.1016/j.sleh.2023.01.005.	1	960
22.9917	6.78167	24.625	10.3375	13	Estonia	0	Boniel-Nissim et al.	2023	Boniel-Nissim M, Tynjälä J, Gobiņa I, Furstova J, van den Eijnden RJJM, Marino C, Klanšček HJ, Klavina-Makrecka S, Villeruša A, Lahti H, Vieno A, Wong SL, Villberg J, Inchley J, Gariépy G. Adolescent use of social media and associations with sleep patterns across 18 European and North American countries. Sleep Health. 2023 Jun;9(3):314-321. doi: 10.1016/j.sleh.2023.01.005.	1	961
23.1625	6.995	24.9083	10.2833	13	Finland	0	Boniel-Nissim et al.	2023	Boniel-Nissim M, Tynjälä J, Gobiņa I, Furstova J, van den Eijnden RJJM, Marino C, Klanšček HJ, Klavina-Makrecka S, Villeruša A, Lahti H, Vieno A, Wong SL, Villberg J, Inchley J, Gariépy G. Adolescent use of social media and associations with sleep patterns across 18 European and North American countries. Sleep Health. 2023 Jun;9(3):314-321. doi: 10.1016/j.sleh.2023.01.005.	1	962
23.4542	7.21667	25.0292	10.4692	13	Greece	0	Boniel-Nissim et al.	2023	Boniel-Nissim M, Tynjälä J, Gobiņa I, Furstova J, van den Eijnden RJJM, Marino C, Klanšček HJ, Klavina-Makrecka S, Villeruša A, Lahti H, Vieno A, Wong SL, Villberg J, Inchley J, Gariépy G. Adolescent use of social media and associations with sleep patterns across 18 European and North American countries. Sleep Health. 2023 Jun;9(3):314-321. doi: 10.1016/j.sleh.2023.01.005.	1	963
22.1625	6.2775	23.4417	9.21667	13	Hungary	0	Boniel-Nissim et al.	2023	Boniel-Nissim M, Tynjälä J, Gobiņa I, Furstova J, van den Eijnden RJJM, Marino C, Klanšček HJ, Klavina-Makrecka S, Villeruša A, Lahti H, Vieno A, Wong SL, Villberg J, Inchley J, Gariépy G. Adolescent use of social media and associations with sleep patterns across 18 European and North American countries. Sleep Health. 2023 Jun;9(3):314-321. doi: 10.1016/j.sleh.2023.01.005.	1	964
22.8833	6.99833	24.2875	10.0625	13	Iceland	0	Boniel-Nissim et al.	2023	Boniel-Nissim M, Tynjälä J, Gobiņa I, Furstova J, van den Eijnden RJJM, Marino C, Klanšček HJ, Klavina-Makrecka S, Villeruša A, Lahti H, Vieno A, Wong SL, Villberg J, Inchley J, Gariépy G. Adolescent use of social media and associations with sleep patterns across 18 European and North American countries. Sleep Health. 2023 Jun;9(3):314-321. doi: 10.1016/j.sleh.2023.01.005.	1	965
23.2167	6.87417	24.8375	10.5375	13	Latvia	0	Boniel-Nissim et al.	2023	Boniel-Nissim M, Tynjälä J, Gobiņa I, Furstova J, van den Eijnden RJJM, Marino C, Klanšček HJ, Klavina-Makrecka S, Villeruša A, Lahti H, Vieno A, Wong SL, Villberg J, Inchley J, Gariépy G. Adolescent use of social media and associations with sleep patterns across 18 European and North American countries. Sleep Health. 2023 Jun;9(3):314-321. doi: 10.1016/j.sleh.2023.01.005.	1	966
22.1667	6.99417	23.8042	9.76167	13	Norway	0	Boniel-Nissim et al.	2023	Boniel-Nissim M, Tynjälä J, Gobiņa I, Furstova J, van den Eijnden RJJM, Marino C, Klanšček HJ, Klavina-Makrecka S, Villeruša A, Lahti H, Vieno A, Wong SL, Villberg J, Inchley J, Gariépy G. Adolescent use of social media and associations with sleep patterns across 18 European and North American countries. Sleep Health. 2023 Jun;9(3):314-321. doi: 10.1016/j.sleh.2023.01.005.	1	967
22.8667	6.57167	24.0917	9.66167	13	Poland	0	Boniel-Nissim et al.	2023	Boniel-Nissim M, Tynjälä J, Gobiņa I, Furstova J, van den Eijnden RJJM, Marino C, Klanšček HJ, Klavina-Makrecka S, Villeruša A, Lahti H, Vieno A, Wong SL, Villberg J, Inchley J, Gariépy G. Adolescent use of social media and associations with sleep patterns across 18 European and North American countries. Sleep Health. 2023 Jun;9(3):314-321. doi: 10.1016/j.sleh.2023.01.005.	1	968
22.6	6.975	23.7875	9.8075	13	Moldova	0	Boniel-Nissim et al.	2023	Boniel-Nissim M, Tynjälä J, Gobiņa I, Furstova J, van den Eijnden RJJM, Marino C, Klanšček HJ, Klavina-Makrecka S, Villeruša A, Lahti H, Vieno A, Wong SL, Villberg J, Inchley J, Gariépy G. Adolescent use of social media and associations with sleep patterns across 18 European and North American countries. Sleep Health. 2023 Jun;9(3):314-321. doi: 10.1016/j.sleh.2023.01.005.	1	969
23.0208	7.04583	24.7833	10.2083	13	Scotland	0	Boniel-Nissim et al.	2023	Boniel-Nissim M, Tynjälä J, Gobiņa I, Furstova J, van den Eijnden RJJM, Marino C, Klanšček HJ, Klavina-Makrecka S, Villeruša A, Lahti H, Vieno A, Wong SL, Villberg J, Inchley J, Gariépy G. Adolescent use of social media and associations with sleep patterns across 18 European and North American countries. Sleep Health. 2023 Jun;9(3):314-321. doi: 10.1016/j.sleh.2023.01.005.	1	970
22.6667	6.69167	23.9583	9.38333	13	Ukraine	0	Boniel-Nissim et al.	2023	Boniel-Nissim M, Tynjälä J, Gobiņa I, Furstova J, van den Eijnden RJJM, Marino C, Klanšček HJ, Klavina-Makrecka S, Villeruša A, Lahti H, Vieno A, Wong SL, Villberg J, Inchley J, Gariépy G. Adolescent use of social media and associations with sleep patterns across 18 European and North American countries. Sleep Health. 2023 Jun;9(3):314-321. doi: 10.1016/j.sleh.2023.01.005.	1	971
21.8333	5.54333	22.3667	8.15667	17	China	0	Yue et al.	2023	Yue L, Cui N, Jiang L, Cui N. Screen use before sleep and emotional problems among adolescents: Preliminary evidence of mediating effect of chronotype and social jetlag. J Affect Disord. 2023 May 1;328:175-182. doi: 10.1016/j.jad.2023.02.049.	1	972
24.2833	6.50833	24.3167	7.625	16	Japan	2	Mizuno et al.	2022	Mizuno K, Okamoto-Mizuno K, Maeda A. Sleep Habits in Pairs of Japanese High School Students and Their Mothers in Summer and Autumn. Clocks Sleep. 2022 Sep 28;4(4):520-534. doi: 10.3390/clockssleep4040041.	1	973
23.5833	5.54167	23.725	6.44167	48.2	Japan	2	Mizuno et al.	2022	Mizuno K, Okamoto-Mizuno K, Maeda A. Sleep Habits in Pairs of Japanese High School Students and Their Mothers in Summer and Autumn. Clocks Sleep. 2022 Sep 28;4(4):520-534. doi: 10.3390/clockssleep4040041.	1	974
22.5167	6.93333	22.55	8.01667	13.7	Mexico	2	Silva-Caballero et al.	2023	Silva-Caballero A, Ball HL, Kramer KL, Bentley GR. Sleep deprivation among adolescents in urban and indigenous-rural Mexican communities. Sci Rep. 2023 Jan 19;13(1):1058. doi: 10.1038/s41598-023-28330-8.	1	975
22.8	6.93333	23.0833	7.98333	13.7	Mexico	2	Silva-Caballero et al.	2023	Silva-Caballero A, Ball HL, Kramer KL, Bentley GR. Sleep deprivation among adolescents in urban and indigenous-rural Mexican communities. Sci Rep. 2023 Jan 19;13(1):1058. doi: 10.1038/s41598-023-28330-8.	1	976
22.3833	6.2	23.5	8.75	13.7	Mexico	2	Silva-Caballero et al.	2023	Silva-Caballero A, Ball HL, Kramer KL, Bentley GR. Sleep deprivation among adolescents in urban and indigenous-rural Mexican communities. Sci Rep. 2023 Jan 19;13(1):1058. doi: 10.1038/s41598-023-28330-8.	1	977
22.2667	6.46667	23.2167	7.86667	12.8	Switzerland	2	Castiglione-Fontanellaz et al.	2023	Castiglione-Fontanellaz CEG, Schaufler S, Wild S, Hamann C, Kaess M, Tarokh L. Sleep regularity in healthy adolescents: Associations with sleep duration, sleep quality, and mental health. J Sleep Res. 2023 Feb 28:e13865. doi: 10.1111/jsr.13865.	1	978
22.9167	6.18333	23.2	7.1	54.5	Japan	0	Yoshiike et al.	2023	Yoshiike, T., Kawamura, A., Utsumi, T., Matsui, K., Kuriyama, K. A prospective study of the association of weekend catch-up sleep and sleep duration with mortality in middle-aged adults. Sleep Biol. Rhythms (2023). https://doi.org/10.1007/s41105-023-00460-6	1	979
24.2	7.7	24.8	8.5	16.3	Brasil	2	Malheiros et al.	2023	Malheiros LE, da Costa BG, Lopes MV, Martins da Costa R, Chaput JP, Silva KS. Association of sleep timing and sleep variability with health-related outcomes in a sample of Brazilian adolescents. Behav Sleep Med. 2023 May 8:1-11. doi: 10.1080/15402002.2023.2207699.	1	980
24.52	7.99	25.05	9.16	23.2	Japan	2	Akashi et al.	2020	Akashi M, Sogawa R, Matsumura R, Nishida A, Nakamura R, Tokuda IT, Node K. A detection method for latent circadian rhythm sleep-wake disorder. EBioMedicine. 2020 Dec;62:103080. doi: 10.1016/j.ebiom.2020.103080.	1	981
24.7283	7.63833	25.3717	10.0617	18	Russia	0	Dokuka et al.	2023	Dokuka S, Mikhaylova O, Krekhovets E. Association between sleep patterns, somatization, and depressive symptoms among Russian university students. Chronobiol Int. 2023 Feb;40(2):215-221. doi: 10.1080/07420528.2022.2157736.	1	982
24.715	8.185	24.9967	9.43667	21	Russia	0	Dokuka et al.	2023	Dokuka S, Mikhaylova O, Krekhovets E. Association between sleep patterns, somatization, and depressive symptoms among Russian university students. Chronobiol Int. 2023 Feb;40(2):215-221. doi: 10.1080/07420528.2022.2157736.	1	983
23.4667	6.58333	24.0833	8.5	32.4	Brasil	0	Lira et al.	2023	Lira NCC, de Araújo SM, de Medeiros ACQ, de Souza JC. Translation, adaptation and validation of the Chrononutrition Profile - Questionnaire (CP-Q) in Brazilian Portuguese. Chronobiol Int. 2023 Apr;40(4):473-482. doi: 10.1080/07420528.2023.2187223.	1	984
24.04	8.01	24.92	9.02	21.2	Germany	0	von Gall et al.	2023	von Gall C, Muth T, Angerer P. Sleep Duration on Workdays Is Correlated with Subjective Workload and Subjective Impact of High Workload on Sleep in Young Healthy Adults. Brain Sci. 2023 May 18;13(5):818. doi: 10.3390/brainsci13050818.	1	985
22.6167	6.33333	22.95	6.98333	44.57	South Africa	0	Willoughby et al.	2023	Willoughby, A., Alikhani, I., Karsikas, M., Chua, X. Y., & Chee, M. W. (2023, May 19). Country Differences in Nocturnal Sleep Variability: Observations from a Large-scale, Long-term Sleep Wearable Study. https://doi.org/10.31234/osf.io/8ahsu	1	986
24.1833	7.46667	24.6333	8.28333	42.71	Hong Kong	0	Willoughby et al.	2023	Willoughby, A., Alikhani, I., Karsikas, M., Chua, X. Y., & Chee, M. W. (2023, May 19). Country Differences in Nocturnal Sleep Variability: Observations from a Large-scale, Long-term Sleep Wearable Study. https://doi.org/10.31234/osf.io/8ahsu	1	987
24.2	7.41667	24.5333	7.83333	41.8	India	0	Willoughby et al.	2023	Willoughby, A., Alikhani, I., Karsikas, M., Chua, X. Y., & Chee, M. W. (2023, May 19). Country Differences in Nocturnal Sleep Variability: Observations from a Large-scale, Long-term Sleep Wearable Study. https://doi.org/10.31234/osf.io/8ahsu	1	988
24.45	7.36667	24.7833	8.08333	37.21	Japan	0	Willoughby et al.	2023	Willoughby, A., Alikhani, I., Karsikas, M., Chua, X. Y., & Chee, M. W. (2023, May 19). Country Differences in Nocturnal Sleep Variability: Observations from a Large-scale, Long-term Sleep Wearable Study. https://doi.org/10.31234/osf.io/8ahsu	1	989
24.2	7.41667	24.6333	8.15	42.02	Singapore	0	Willoughby et al.	2023	Willoughby, A., Alikhani, I., Karsikas, M., Chua, X. Y., & Chee, M. W. (2023, May 19). Country Differences in Nocturnal Sleep Variability: Observations from a Large-scale, Long-term Sleep Wearable Study. https://doi.org/10.31234/osf.io/8ahsu	1	990
24.0833	7.15	24.4333	7.91667	45.75	Korea	0	Willoughby et al.	2023	Willoughby, A., Alikhani, I., Karsikas, M., Chua, X. Y., & Chee, M. W. (2023, May 19). Country Differences in Nocturnal Sleep Variability: Observations from a Large-scale, Long-term Sleep Wearable Study. https://doi.org/10.31234/osf.io/8ahsu	1	991
23.9333	7.3	24.2667	7.78333	42.39	Thailand	0	Willoughby et al.	2023	Willoughby, A., Alikhani, I., Karsikas, M., Chua, X. Y., & Chee, M. W. (2023, May 19). Country Differences in Nocturnal Sleep Variability: Observations from a Large-scale, Long-term Sleep Wearable Study. https://doi.org/10.31234/osf.io/8ahsu	1	992
23.4	7.05	23.8833	7.96667	39.62	Austria	0	Willoughby et al.	2023	Willoughby, A., Alikhani, I., Karsikas, M., Chua, X. Y., & Chee, M. W. (2023, May 19). Country Differences in Nocturnal Sleep Variability: Observations from a Large-scale, Long-term Sleep Wearable Study. https://doi.org/10.31234/osf.io/8ahsu	1	993
23.6167	7.31667	24.0167	8.1	43.07	Belgium	0	Willoughby et al.	2023	Willoughby, A., Alikhani, I., Karsikas, M., Chua, X. Y., & Chee, M. W. (2023, May 19). Country Differences in Nocturnal Sleep Variability: Observations from a Large-scale, Long-term Sleep Wearable Study. https://doi.org/10.31234/osf.io/8ahsu	1	994
23.4833	7.08333	23.9167	7.95	36.99	Czech Republic	0	Willoughby et al.	2023	Willoughby, A., Alikhani, I., Karsikas, M., Chua, X. Y., & Chee, M. W. (2023, May 19). Country Differences in Nocturnal Sleep Variability: Observations from a Large-scale, Long-term Sleep Wearable Study. https://doi.org/10.31234/osf.io/8ahsu	1	995
23.3667	7.05	24.05	8.05	39.71	Denmark	0	Willoughby et al.	2023	Willoughby, A., Alikhani, I., Karsikas, M., Chua, X. Y., & Chee, M. W. (2023, May 19). Country Differences in Nocturnal Sleep Variability: Observations from a Large-scale, Long-term Sleep Wearable Study. https://doi.org/10.31234/osf.io/8ahsu	1	996
23.9333	7.61667	24.5167	8.68333	40.85	Estonia	0	Willoughby et al.	2023	Willoughby, A., Alikhani, I., Karsikas, M., Chua, X. Y., & Chee, M. W. (2023, May 19). Country Differences in Nocturnal Sleep Variability: Observations from a Large-scale, Long-term Sleep Wearable Study. https://doi.org/10.31234/osf.io/8ahsu	1	997
23.5333	7.25	24.1667	8.38333	44.47	Finland	0	Willoughby et al.	2023	Willoughby, A., Alikhani, I., Karsikas, M., Chua, X. Y., & Chee, M. W. (2023, May 19). Country Differences in Nocturnal Sleep Variability: Observations from a Large-scale, Long-term Sleep Wearable Study. https://doi.org/10.31234/osf.io/8ahsu	1	998
23.8	7.45	24.2	8.25	42.35	France	0	Willoughby et al.	2023	Willoughby, A., Alikhani, I., Karsikas, M., Chua, X. Y., & Chee, M. W. (2023, May 19). Country Differences in Nocturnal Sleep Variability: Observations from a Large-scale, Long-term Sleep Wearable Study. https://doi.org/10.31234/osf.io/8ahsu	1	999
23.5167	7.11667	24.0667	8.13333	41.59	Germany	0	Willoughby et al.	2023	Willoughby, A., Alikhani, I., Karsikas, M., Chua, X. Y., & Chee, M. W. (2023, May 19). Country Differences in Nocturnal Sleep Variability: Observations from a Large-scale, Long-term Sleep Wearable Study. https://doi.org/10.31234/osf.io/8ahsu	1	1000
24	7.58333	24.4667	8.36667	41.66	Greece	0	Willoughby et al.	2023	Willoughby, A., Alikhani, I., Karsikas, M., Chua, X. Y., & Chee, M. W. (2023, May 19). Country Differences in Nocturnal Sleep Variability: Observations from a Large-scale, Long-term Sleep Wearable Study. https://doi.org/10.31234/osf.io/8ahsu	1	1001
23.65	7.43333	24.2	8.26667	40.97	Ireland	0	Willoughby et al.	2023	Willoughby, A., Alikhani, I., Karsikas, M., Chua, X. Y., & Chee, M. W. (2023, May 19). Country Differences in Nocturnal Sleep Variability: Observations from a Large-scale, Long-term Sleep Wearable Study. https://doi.org/10.31234/osf.io/8ahsu	1	1002
23.8333	7.28333	24.2167	8.08333	42.64	Italy	0	Willoughby et al.	2023	Willoughby, A., Alikhani, I., Karsikas, M., Chua, X. Y., & Chee, M. W. (2023, May 19). Country Differences in Nocturnal Sleep Variability: Observations from a Large-scale, Long-term Sleep Wearable Study. https://doi.org/10.31234/osf.io/8ahsu	1	1003
23.5667	7.35	24.0333	8.15	41.57	Netherlands	0	Willoughby et al.	2023	Willoughby, A., Alikhani, I., Karsikas, M., Chua, X. Y., & Chee, M. W. (2023, May 19). Country Differences in Nocturnal Sleep Variability: Observations from a Large-scale, Long-term Sleep Wearable Study. https://doi.org/10.31234/osf.io/8ahsu	1	1004
23.8167	7.38333	24.4667	8.53333	41.07	Norway	0	Willoughby et al.	2023	Willoughby, A., Alikhani, I., Karsikas, M., Chua, X. Y., & Chee, M. W. (2023, May 19). Country Differences in Nocturnal Sleep Variability: Observations from a Large-scale, Long-term Sleep Wearable Study. https://doi.org/10.31234/osf.io/8ahsu	1	1005
23.75	7.33333	24.3	8.2	36.74	Poland	0	Willoughby et al.	2023	Willoughby, A., Alikhani, I., Karsikas, M., Chua, X. Y., & Chee, M. W. (2023, May 19). Country Differences in Nocturnal Sleep Variability: Observations from a Large-scale, Long-term Sleep Wearable Study. https://doi.org/10.31234/osf.io/8ahsu	1	1006
24.0167	7.65	24.4167	8.38333	42.87	Portugal	0	Willoughby et al.	2023	Willoughby, A., Alikhani, I., Karsikas, M., Chua, X. Y., & Chee, M. W. (2023, May 19). Country Differences in Nocturnal Sleep Variability: Observations from a Large-scale, Long-term Sleep Wearable Study. https://doi.org/10.31234/osf.io/8ahsu	1	1007
24.0833	7.65	24.5167	8.43333	39.64	Romania	0	Willoughby et al.	2023	Willoughby, A., Alikhani, I., Karsikas, M., Chua, X. Y., & Chee, M. W. (2023, May 19). Country Differences in Nocturnal Sleep Variability: Observations from a Large-scale, Long-term Sleep Wearable Study. https://doi.org/10.31234/osf.io/8ahsu	1	1008
24.55	8.2	24.9667	8.95	37.53	Russia	0	Willoughby et al.	2023	Willoughby, A., Alikhani, I., Karsikas, M., Chua, X. Y., & Chee, M. W. (2023, May 19). Country Differences in Nocturnal Sleep Variability: Observations from a Large-scale, Long-term Sleep Wearable Study. https://doi.org/10.31234/osf.io/8ahsu	1	1009
23.3333	6.93333	23.75	7.75	37.8	Slovakia	0	Willoughby et al.	2023	Willoughby, A., Alikhani, I., Karsikas, M., Chua, X. Y., & Chee, M. W. (2023, May 19). Country Differences in Nocturnal Sleep Variability: Observations from a Large-scale, Long-term Sleep Wearable Study. https://doi.org/10.31234/osf.io/8ahsu	1	1010
23.9833	7.55	24.4833	8.41667	43.49	Spain	0	Willoughby et al.	2023	Willoughby, A., Alikhani, I., Karsikas, M., Chua, X. Y., & Chee, M. W. (2023, May 19). Country Differences in Nocturnal Sleep Variability: Observations from a Large-scale, Long-term Sleep Wearable Study. https://doi.org/10.31234/osf.io/8ahsu	1	1011
23.4167	7.06667	24	8.05	43.11	Sweden	0	Willoughby et al.	2023	Willoughby, A., Alikhani, I., Karsikas, M., Chua, X. Y., & Chee, M. W. (2023, May 19). Country Differences in Nocturnal Sleep Variability: Observations from a Large-scale, Long-term Sleep Wearable Study. https://doi.org/10.31234/osf.io/8ahsu	1	1012
23.4833	7.05	23.9833	8.05	43.31	Switzerland	0	Willoughby et al.	2023	Willoughby, A., Alikhani, I., Karsikas, M., Chua, X. Y., & Chee, M. W. (2023, May 19). Country Differences in Nocturnal Sleep Variability: Observations from a Large-scale, Long-term Sleep Wearable Study. https://doi.org/10.31234/osf.io/8ahsu	1	1013
23.45	7.16667	23.8833	7.9	42.94	UK	0	Willoughby et al.	2023	Willoughby, A., Alikhani, I., Karsikas, M., Chua, X. Y., & Chee, M. W. (2023, May 19). Country Differences in Nocturnal Sleep Variability: Observations from a Large-scale, Long-term Sleep Wearable Study. https://doi.org/10.31234/osf.io/8ahsu	1	1014
23.95	7.33333	24.4667	8.05	41.84	UAE	0	Willoughby et al.	2023	Willoughby, A., Alikhani, I., Karsikas, M., Chua, X. Y., & Chee, M. W. (2023, May 19). Country Differences in Nocturnal Sleep Variability: Observations from a Large-scale, Long-term Sleep Wearable Study. https://doi.org/10.31234/osf.io/8ahsu	1	1015
23.3333	7.03333	23.7667	7.8	44.43	Canada	0	Willoughby et al.	2023	Willoughby, A., Alikhani, I., Karsikas, M., Chua, X. Y., & Chee, M. W. (2023, May 19). Country Differences in Nocturnal Sleep Variability: Observations from a Large-scale, Long-term Sleep Wearable Study. https://doi.org/10.31234/osf.io/8ahsu	1	1016
23.6	7.13333	24.1833	7.98333	42.66	Mexico	0	Willoughby et al.	2023	Willoughby, A., Alikhani, I., Karsikas, M., Chua, X. Y., & Chee, M. W. (2023, May 19). Country Differences in Nocturnal Sleep Variability: Observations from a Large-scale, Long-term Sleep Wearable Study. https://doi.org/10.31234/osf.io/8ahsu	1	1017
23.1167	6.76667	23.55	7.55	46.28	USA	0	Willoughby et al.	2023	Willoughby, A., Alikhani, I., Karsikas, M., Chua, X. Y., & Chee, M. W. (2023, May 19). Country Differences in Nocturnal Sleep Variability: Observations from a Large-scale, Long-term Sleep Wearable Study. https://doi.org/10.31234/osf.io/8ahsu	1	1018
22.8667	6.63333	23.3	7.31667	42.37	Australia	0	Willoughby et al.	2023	Willoughby, A., Alikhani, I., Karsikas, M., Chua, X. Y., & Chee, M. W. (2023, May 19). Country Differences in Nocturnal Sleep Variability: Observations from a Large-scale, Long-term Sleep Wearable Study. https://doi.org/10.31234/osf.io/8ahsu	1	1019
22.8667	6.7	23.2667	7.43333	44.98	New Zealand	0	Willoughby et al.	2023	Willoughby, A., Alikhani, I., Karsikas, M., Chua, X. Y., & Chee, M. W. (2023, May 19). Country Differences in Nocturnal Sleep Variability: Observations from a Large-scale, Long-term Sleep Wearable Study. https://doi.org/10.31234/osf.io/8ahsu	1	1020
20.2833	7	20.7	7.15	8.4	Australia	1	Horne et al.	2023	Horne RS, Shetty M, Vandeleur M, Davey MJ, Walter LM, Nixon GM. Assessing sleep in children with Down syndrome: Comparison of parental sleep diaries, actigraphy and polysomnography. Sleep Med. 2023 Jul;107:309-315. doi: 10.1016/j.sleep.2023.05.003.	1	1021
20.4667	6.83333	20.9667	6.91667	8.4	Australia	1	Horne et al.	2023	Horne RS, Shetty M, Vandeleur M, Davey MJ, Walter LM, Nixon GM. Assessing sleep in children with Down syndrome: Comparison of parental sleep diaries, actigraphy and polysomnography. Sleep Med. 2023 Jul;107:309-315. doi: 10.1016/j.sleep.2023.05.003.	1	1022
20.785	7.015	20.915	7.285	7.3	USA	0	Moreno et al.	2023	Moreno JP, Wood AC, Reichek B, Dadabhoy H, Baranowski T, Thompson D, O'Connor TM. Examination of parent-reported differences in children's daily screen use, sleep, and sleep hygiene behaviors during the school year and summer and their association with BMI. Sleep Health. 2023 Jun;9(3):306-313. doi: 10.1016/j.sleh.2023.01.013.	1	1023
21.4364	9.14561	21.9707	9.74422	10.5	China	0	Cui et al.	2023	Cui L, Li J, Lou X, Yang L, Chen T, Guo Y, Zhou H, Yang X, Li Z, Wang X. Associations between sleep characteristics and risk for high blood pressure among students aged 9-18: A cross-sectional study in China. Sleep Med. 2023 Jul;107:72-80. doi: 10.1016/j.sleep.2023.04.004.	1	1024
22.2738	8.00046	22.5667	9.14335	14	China	0	Cui et al.	2023	Cui L, Li J, Lou X, Yang L, Chen T, Guo Y, Zhou H, Yang X, Li Z, Wang X. Associations between sleep characteristics and risk for high blood pressure among students aged 9-18: A cross-sectional study in China. Sleep Med. 2023 Jul;107:72-80. doi: 10.1016/j.sleep.2023.04.004.	1	1025
22.8812	7.52828	23.0614	8.64569	16	China	0	Cui et al.	2023	Cui L, Li J, Lou X, Yang L, Chen T, Guo Y, Zhou H, Yang X, Li Z, Wang X. Associations between sleep characteristics and risk for high blood pressure among students aged 9-18: A cross-sectional study in China. Sleep Med. 2023 Jul;107:72-80. doi: 10.1016/j.sleep.2023.04.004.	1	1026
21.2833	8.26667	21.4833	8.55	2.3	UK	0	Pal et al.	2023	Pal E, Blackwell JE, Ball HL, Collings PJ. Sociodemographic, temporal and bedtime routine correlates of sleep timing and duration in South Asian and white children: A Born in Bradford study. Sleep Med X. 2023 Mar 15;5:100068. doi: 10.1016/j.sleepx.2023.100068.	1	1027
19.8333	7.16667	19.9833	7.4	2.3	UK	0	Pal et al.	2023	Pal E, Blackwell JE, Ball HL, Collings PJ. Sociodemographic, temporal and bedtime routine correlates of sleep timing and duration in South Asian and white children: A Born in Bradford study. Sleep Med X. 2023 Mar 15;5:100068. doi: 10.1016/j.sleepx.2023.100068.	1	1028
23.4667	7.58333	25.4917	9.25833	16.9	Canada	1	D’Angiulli et al.	2023	D’Angiulli A, G Byczynski, WH Yeh, G Garrett, G Goldfield, P Devenyi, … Cognitive control, bedtime patterns, and testing time in female adolescent students: behavioral and neuro-electrophysiological correlates. Frontiers in Public Health 11, 1022731	1	1029
23.4167	7.31667	24.7167	9.56667	15.2	Norway	2	Hrozanova et al.	2023	Hrozanova M, Haugan JA, Saksvik-Lehouillier I, Skalická V, Krondorf L, Stenseng F, Moen F. Quantifying teenagers' sleep patterns and sex differences in social jetlag using at-home sleep monitoring. Sleep Med. 2023 Jul;107:1-8. doi: 10.1016/j.sleep.2023.04.005.	1	1030
25.6	7.1	25.8	8.8	21.5	Singapore	2	Yeo et al.	2023	Yeo SC, Lai CKY, Tan J, Lim S, Chandramoghan Y, Tan TK, Gooley JJ. Early morning university classes are associated with impaired sleep and academic performance. Nat Hum Behav. 2023 Apr;7(4):502-514. doi: 10.1038/s41562-023-01531-x.	1	1031
23.9333	6.96667	24.3333	8.31667	26.7	Russia	0	Polugrudov et al.	2023	Polugrudov A.S., Sergey V. Popov, Vasily V. Smirnov, Natalya V. Zueva & Mikhail F. Borisenkov (2023) Meal timing and melatonin-containing food intake in young people with social jetlag, Biological Rhythm Research, DOI: 10.1080/09291016.2023.2245569	1	1032
22.635	7.6	24.375	10.365	20.4	Brasil	0	Pompeia et al.	2023	Pompeia S, Panjeh S, Louzada FM, D'Almeida V, Hipolide DC, Cogo-Moreira H. Social jetlag is associated with adverse cardiometabolic latent traits in early adolescence: an observational study. Front Endocrinol (Lausanne). 2023 Jul 4;14:1085302. doi: 10.3389/fendo.2023.1085302.	1	1033
23.7	6.6	24.4	8.6	33.6	Korea	0	Choi et al.	2023	Choi SJ, Joo EY, Hong SB. Sleep-wake pattern, chronotype and seizures in patients with epilepsy. Epilepsy Res. 2016 Feb;120:19-24. doi: 10.1016/j.eplepsyres.2015.11.010.	1	1034
23.8935	6.10753	24.101	7.29512	46.9	Japan	0	Islam et al.	2018	Islam Z, Akter S, Kochi T, Hu H, Eguchi M, Yamaguchi M, Kuwahara K, Kabe I, Mizoue T. Association of social jetlag with metabolic syndrome among Japanese working population: the Furukawa Nutrition and Health Study. Sleep Med. 2018 Nov;51:53-58. doi: 10.1016/j.sleep.2018.07.003.	1	1035
24.6323	7.0787	25.2149	10.1753	19.5	Russia	0	Putilov et al.	2023	Putilov AA, Sveshnikov DS, Bakaeva ZV, Yakunina EB, Starshinov YP, Torshin VI, Trutneva EA, Lapkin MM, Lopatskaya ZN, Gandina EO, Ligun NV, Puchkova AN, Dorokhov VB. Evening chronotype, insufficient weekday sleep, and weekday-weekend gap in sleep times: What is really to blame for a reduction in self-perceived health among university students? Chronobiol Int. 2023 Jul 3;40(7):874-884. doi: 10.108…	1	1036
23.75	6.91667	26.1833	11.8833	17.4	Norway	0	Hysing et al.	2023	Hysing M, Sivertsen B, Nilsen SA, Heradstveit O, Bøe T, Askeland KG. Sleep and dropout from upper secondary school: A register-linked study. Sleep Health. 2023 Aug;9(4):519-523. doi: 10.1016/j.sleh.2023.05.004.	1	1037
23.9833	7.55	24.5167	10.45	17.9	Norway	0	Schønning et al.	2023	Schønning V, Hysing M, Dovran A, Nilsen SA, Hafstad GS, Vedaa Ø, Sivertsen B. Sleep and childhood maltreatment: A matched-control study of sleep characteristics in Norwegian 16-19-year-olds. Scand J Psychol. 2023 Aug 25. doi: 10.1111/sjop.12960.	1	1038
23.4167	6.83333	25.5333	11.1833	17.7	Norway	0	Schønning et al.	2023	Schønning V, Hysing M, Dovran A, Nilsen SA, Hafstad GS, Vedaa Ø, Sivertsen B. Sleep and childhood maltreatment: A matched-control study of sleep characteristics in Norwegian 16-19-year-olds. Scand J Psychol. 2023 Aug 25. doi: 10.1111/sjop.12960.	1	1039
24.755	8.585	26.005	11.065	22.8	Uruguay	0	Marchesano et al.	2023	Marchesano M., Natalia Coirolo, Bettina Tassino & Ana Silva (2023) Impact of training-shift change on chronotype and social jetlag: a longitudinal study on dancers, Biological Rhythm Research, DOI: 10.1080/09291016.2023.2246358	1	1040
24.871	8.64608	26.0672	10.1706	21.8	Brasil	2	Viana Mendes et al.	2023	Viana Mendes J, Benedito-Silva AA, Medeiros Andrade MA, Vartanian D, da Silva Brandão Gonçalves B, Cipolla-Neto J, Pedrazzoli M. Actigraphic characterization of sleep and circadian phenotypes of PER3 gene VNTR genotypes. Chronobiol Int. 2023 Sep 2;40(9):1244-1250. doi: 10.1080/07420528.2023.2256858.	1	1041
21.9667	6.95	21.85	7.23333	54.5	China	0	Tuerxun et al.	2023	Tuerxun P, Xu K, Wang M, Wei M, Wang Y, Jiang Y, Li C, Zhang J. Obesogenic sleep patterns among Chinese preschool children: A latent profile and transition analysis of the association sleep patterns and obesity risk. Sleep Med. 2023 Oct;110:123-131. doi: 10.1016/j.sleep.2023.07.031.	1	1042
23.0833	7.13333	24.1333	8.53333	26.7	USA	0	Cox et al.	2023	Cox RC, Blumenstein AB, Burke TM, Depner CM, Guerin MK, Hay-Arthur E, Higgins J, Knauer OA, Lanza SM, Markwald RR, Melanson EL, McHill AW, Morton SJ, Ritchie HK, Smith MR, Smits AN, Sprecher KE, Stothard ER, Withrow D, Wright KP Jr. Distribution of dim light melatonin offset (DLMOff) and phase relationship to waketime in healthy adults and associations with chronotype. Sleep Health. 2023 Sep 28:S…	1	1043
25.6333	8.70833	25.8583	9.25833	22.64	Singapore	2	Ng et al.	2023	Ng ASC, Massar SAA, Bei B, Chee MWL. Assessing 'readiness' by tracking fluctuations in daily sleep duration and their effects on daily mood, motivation, and sleepiness. Sleep Med. 2023 Sep 28;112:30-38. doi: 10.1016/j.sleep.2023.09.028.	1	1044
21.2333	6.96667	21.5167	7.6	35.7	Japan	0	Inoue et al.	2023	Inoue M, Nakajima S, Inada N, Oi H, Sato N, Miyazaki Y, Takashina H, Tagaya H, Adachi Y, Kuga H. Development of the Parenting Behavior Checklist to Promote Preschoolers' Sleep (PCPP). Behav Sleep Med. 2023 Aug 6:1-11. doi: 10.1080/15402002.2023.2241590.	1	1045
24.03	7.26	25.58	9.16	28.8	Hungary	0	Taji et al.	2023	Taji W, Pierson R, Ujma PP. Protocol of the Budapest sleep, experiences, and traits study: An accessible resource for understanding associations between daily experiences, individual differences, and objectively measured sleep. PLoS One. 2023 Oct 19;18(10):e0288909. doi: 10.1371/journal.pone.0288909.	1	1046
24.2517	7.58167	25.2867	9.44667	24.2	Italy	0	Orsini et al.	2023	Orsini F., Gianluca Giusti, Lisa Zarantonello, Rodolfo Costa, Sara Montagnese, Riccardo Rossi,Driving fatigue increases after the Spring transition to Daylight Saving Time in young male drivers: A pilot study.Transportation Research Part F: Traffic Psychology and Behaviour,	1	1047
24.15	8.05	25.1	9.3	21.2	Germany	2	von Gall et al.	2023	von Gall C.; Holub, L.; Pfeffer, M.; Eickhoff, S. Chronotype-Dependent Sleep Loss Is Associated with a Lower Amplitude in Circadian Rhythm and a Higher Fragmentation of REM Sleep in Young Healthy Adults. Brain Sci. 2023, 13, 1482. https://doi.org/ 10.3390/brainsci13101482	1	1048
26.6667	9.45	26.8667	10.0667	23	USA	2	Lu et al.	2023	Lu S, Stone JE, Klerman EB, McHill AW, Barger LK, Robbins R, Fischer D, Sano A, Czeisler CA, Rajaratnam SMW, Phillips AJK. The organization of sleep-wake patterns around daily schedules in college students. Sleep. 2023 Nov 1:zsad278. doi: 10.1093/sleep/zsad278.	1	1049
22.3833	6.2	23.5	8.75	13.8	Mexico	2	Silva-Caballero et al.	2023	Silva-Caballero A, Ball HL, Kramer KL, Bentley GR. Sleep tight! Adolescent sleep quality across three distinct sleep ecologies. Evol Med Public Health. 2023 Nov 21;11(1):448-460. doi: 10.1093/emph/eoad040.	1	1050
22.5167	6.93333	22.55	8.01667	13.5	Mexico	2	Silva-Caballero et al.	2023	Silva-Caballero A, Ball HL, Kramer KL, Bentley GR. Sleep tight! Adolescent sleep quality across three distinct sleep ecologies. Evol Med Public Health. 2023 Nov 21;11(1):448-460. doi: 10.1093/emph/eoad040.	1	1051
22.8	6.93333	23.0833	7.98333	14	Mexico	2	Silva-Caballero et al.	2023	Silva-Caballero A, Ball HL, Kramer KL, Bentley GR. Sleep tight! Adolescent sleep quality across three distinct sleep ecologies. Evol Med Public Health. 2023 Nov 21;11(1):448-460. doi: 10.1093/emph/eoad040.	1	1052
22.0833	5.8	24.5333	9.78333	22.5	Australia	1	Sargent et al.	2014	Sargent C, Halson S, Roach GD. Sleep or swim? Early-morning training severely restricts the amount of sleep obtained by elite swimmers. Eur J Sport Sci. 2014;14 Suppl 1:S310-5. doi: 10.1080/17461391.2012.696711.	1	1053
23.4	6.8	25.4	10.8	15.5	Argentina	0	Pérez-Chada et al.	2023	Pérez-Chada D, Bioch SA, Schönfeld D, Gozal D, Perez-Lloret S; Sleep in Adolescents Collaborative study group. Screen use, sleep duration, daytime somnolence, and academic failure in school-aged adolescents. PLoS One. 2023 Feb 14;18(2):e0281379. doi: 10.1371/journal.pone.0281379.	1	1054
21.6833	7.58333	22.2333	8.05	9.7	Ireland	2	Keenan et al.	2024	Keenan L, Bramham J, Dinca M, Coogan AN, Downes M. Sleep and daytime functioning in children with tourette syndrome: A two-week case-control study with actigraphy and cognitive assessments. Sleep Med. 2024 Jan;113:313-327. doi: 10.1016/j.sleep.2023.11.1137.	1	1055
24.5	7.64	25.58	8.96	35	Antarctic	0	Tortello et al.	2023	Tortello C, Folgueira A, Lopez JM, Didier Garnham F, Sala Lozano E, Rivero MS, Simonelli G, Vigo DE, Plano SA. Chronotype delay and sleep disturbances shaped by the Antarctic polar night. Sci Rep. 2023 Sep 24;13(1):15957. doi: 10.1038/s41598-023-43102-0.	1	1056
23.4172	7.5	24.0828	9.86201	21	Brasil	0	Salles et al.	2023	Salles C, Moraes Almondes K, Araújo M, Marques I, Haine Gonzaga L, Meira-E-Cruz M, Aguiar C, Costa Dias C. Sleep Quality and Social Jetlag in Young Adults During the Social Distancing Caused by COVID-19. Sleep Sci. 2023 Jul 6;16(2):216-226. doi: 10.1055/s-0043-1770806.	1	1057
24.18	7	25.08	9	34	Iran	0	Niroumand Sarvandani et al.	2023	Niroumand Sarvandani M ; Mohtashami ; Talebi ; Asadi ; Ghanbari ; Rahimi ; Abbasi ; Garmabi. The role of sleep problems and social jetlag with addiction potential: a cross-sectional study, Biological Rhythm Research, DOI: 10.1080/09291016.2023.2290696	1	1058
23.2	7	24.2	9.4	15.5	USA	0	Wong et al.	2024	Wong P, Meltzer LJ, Barker D, Honaker SM, Owens JA, Saletin JM, Seixas A, Wahlstrom KL, Wolfson AR, Carskadon MA. The associations between instructional approach, sleep characteristics and adolescent mental health: Lessons from the COVID-19 pandemic. Sleep Health. 2024 Jan 22:S2352-7218(23)00295-4. doi: 10.1016/j.sleh.2023.11.013.	1	1059
23.5833	6.41667	24.125	7.875	43	France	0	Coelho et al.	2024	Coelho J, Rey M, Labonne A, Adan A, Taillard J, Geoffroy PA, Cugy D, Dakar A, Philip P, Poirot I, Royant-Parola S, Hartley S, Vecchierini MF, Micoulaud-Franchi JA. Better characterizing sleep beliefs for personalized sleep health promotion: the French sleep beliefs scale validation study. Front Public Health. 2024 Jan 11;11:1293045. doi: 10.3389/fpubh.2023.1293045.	1	1060
23.44	7.3	23.74	7.49	25.9	India	0	Dwivedi et al.	2022	Dwivedi A, Malik S, Rani S. The unlock consequences: changes in daily behaviors and mental health in Indian population during the second wave of COVID-19. Sleep Sci. 2022 Jul-Sep;15(3):341-346. doi: 10.5935/1984-0063.20220060.	1	1061
21.03	5.26	21.05	5.26	73	India	0	Minz et al.	2024	Minz S, Pati AK, Mohapatra M, Pati UC, Sahu P, Acharya PK, Kumari RB, Satpathy R. Patterns in behavioural sleep variables and social jetlag in elderly people of Western Odisha. Chronobiol Int. 2024 Feb 14:1-12. doi: 10.1080/07420528.2024.2315216.	1	1062
21.7667	7.91667	22.25	8.06667	3.2	Spain	0	Zerón-Rugerio et al.	2024	Zerón-Rugerio MF, Santamaría-Orleans A, Izquierdo-Pulido M. Late bedtime combined with more screen time before bed increases the risk of obesity and lowers diet quality in Spanish children. Appetite. 2024 May 1;196:107293. doi: 10.1016/j.appet.2024.107293.	1	1063
21.95	7.81667	22.7333	8.96667	7.5	Spain	0	Zerón-Rugerio et al.	2024	Zerón-Rugerio MF, Santamaría-Orleans A, Izquierdo-Pulido M. Late bedtime combined with more screen time before bed increases the risk of obesity and lowers diet quality in Spanish children. Appetite. 2024 May 1;196:107293. doi: 10.1016/j.appet.2024.107293.	1	1064
22.9833	6.91667	24	10	14.4	China	0	Matricciani et al.	2012	Matricciani L, Olds T, Petkov J. In search of lost sleep: secular trends in the sleep time of school-aged children and adolescents. Sleep Med Rev. 2012 Jun;16(3):203-11. doi: 10.1016/j.smrv.2011.03.005.	1	1065
23	6.75	24	9.5	14.7	China	0	Matricciani et al.	2012	Matricciani L, Olds T, Petkov J. In search of lost sleep: secular trends in the sleep time of school-aged children and adolescents. Sleep Med Rev. 2012 Jun;16(3):203-11. doi: 10.1016/j.smrv.2011.03.005.	1	1066
24	7.91667	25	10	26.8	Turkey	0	Uyar et al.	2023	Uyar GÖ, Hilal Yildiran, Gülay Korkmaz, Gülnur Kiliç & Behiye Nur Kesgin (2023) The effect of chronotype on chrononutrition and circadian parameters in adults: a cross-sectional study, Biological Rhythm Research, 54:12, 782-802, DOI: 10.1080/09291016.2023.2272764	1	1067
23.0167	7	23.65	8.96667	18	UK	0	Wilson et al.	2024	Wilson SMB, Jones MI, Draper SB, Parker JK. Early morning sport scheduling is associated with poorer subjective sleep characteristics in British student-athletes. Scand J Med Sci Sports. 2024 Mar;34(3):e14598. doi: 10.1111/sms.14598.	1	1068
23.85	7.45	24.9333	9.6	24.7	UK	0	Crowley et al.	2023	Crowley R, Javadi AH, Tamminen J. Better alignment between circadian preference and sleep and work timings during COVID-19 did not benefit work engagement at home. Chronobiol Int. 2023 Oct 3;40(10):1361-1374. doi: 10.1080/07420528.2023.2258954.	1	1069
22.1333	5.96667	23.3	8.7	13.5	Germany	0	Perrar et al.	2023	Perrar I, Alexy U, Jankovic N. Chronobiological changes due to school closures during the COVID-19 pandemic among adolescents in the DOrtmund Nutritional and Anthropometric Longitudinally Designed cohort study. Eur J Pediatr. 2023 Jun;182(6):2801-2805. doi: 10.1007/s00431-023-04963-9.	1	1070
22.4	6.08333	23.1333	8.25	12.1	Brasil	0	Mello et al.	2001	Mello, L., Louzada, F. M., & Menna-Barreto, L. (2001). Effects of school schedule transition on sleep-wake cycle of Brazilian adolescents. Sleep and Hypnosis, 3, 106–111.	1	1071
22	7.25	22.7833	8.96667	7.3	Uruguay	0	Olivera et al.	2023	Olivera A, Estevan I, Tassino B, Rossel C, Silva A. Epidemiology of sleep patterns and circadian typology in uruguayan children: The contribution of school shifts. Sleep Med X. 2023 Dec 22;7:100099. doi: 10.1016/j.sleepx.2023.100099.	1	1072
22.78	6.12	23.69	9.03	14.5	Mexico	0	Peng et al.	2024	Peng Y, Arboleda-Merino L, Arrona-Palacios A, Cantoral A, Tellez Rojo MM, Peterson KE, Olascoaga-Torres L, Jansen EC. The Impact of the Double School Shift System on Lifestyle Behaviors Among Mexican Adolescents. J Adolesc Health. 2024 Mar 13:S1054-139X(24)00062-4. doi: 10.1016/j.jadohealth.2024.01.026.	1	1073
23	6	23.8333	8	34.1	Poland	0	Janc et al.	2024	Janc M, Jankowska A, Jozwiak Z, Makowiec-Dabrowska T, Jurewicz J, Polanska K. Distribution of sleep components while working remotely. Int J Occup Med Environ Health. 2024 Mar 5;37(1):34-44. doi: 10.13075/ijomeh.1896.02320.	1	1074
23.5	6.5	24	8	29.8	Poland	0	Janc et al.	2024	Janc M, Jankowska A, Jozwiak Z, Makowiec-Dabrowska T, Jurewicz J, Polanska K. Distribution of sleep components while working remotely. Int J Occup Med Environ Health. 2024 Mar 5;37(1):34-44. doi: 10.13075/ijomeh.1896.02320.	1	1075
24	7	24	9	26.6	Poland	0	Janc et al.	2024	Janc M, Jankowska A, Jozwiak Z, Makowiec-Dabrowska T, Jurewicz J, Polanska K. Distribution of sleep components while working remotely. Int J Occup Med Environ Health. 2024 Mar 5;37(1):34-44. doi: 10.13075/ijomeh.1896.02320.	1	1076
23.5167	7.55	24.5333	10.2667	15.6	Spain	0	Garcia-Roman et al.	2023	Garcia-Roman, J., Gracia, P., & Zerbini, G. (2023, September 7). Cross-National Variations in Adolescent Sleep Patterns: A Time-Use Study. https://doi.org/10.31219/osf.io/h2fv5	1	1077
22.8167	7.25	23.5333	9.48333	15.5	Spain	0	Garcia-Roman et al.	2023	Garcia-Roman, J., Gracia, P., & Zerbini, G. (2023, September 7). Cross-National Variations in Adolescent Sleep Patterns: A Time-Use Study. https://doi.org/10.31219/osf.io/h2fv5	1	1078
22.4167	6.96667	23.2167	9.63333	15.6	Spain	0	Garcia-Roman et al.	2023	Garcia-Roman, J., Gracia, P., & Zerbini, G. (2023, September 7). Cross-National Variations in Adolescent Sleep Patterns: A Time-Use Study. https://doi.org/10.31219/osf.io/h2fv5	1	1079
21.95	6.26667	22.4333	8.68333	15.8	Spain	0	Garcia-Roman et al.	2023	Garcia-Roman, J., Gracia, P., & Zerbini, G. (2023, September 7). Cross-National Variations in Adolescent Sleep Patterns: A Time-Use Study. https://doi.org/10.31219/osf.io/h2fv5	1	1080
22.8667	7	23.55	9.38333	15.6	Spain	0	Garcia-Roman et al.	2023	Garcia-Roman, J., Gracia, P., & Zerbini, G. (2023, September 7). Cross-National Variations in Adolescent Sleep Patterns: A Time-Use Study. https://doi.org/10.31219/osf.io/h2fv5	1	1081
23.65	7	23.5333	8.73333	15.1	Spain	0	Garcia-Roman et al.	2023	Garcia-Roman, J., Gracia, P., & Zerbini, G. (2023, September 7). Cross-National Variations in Adolescent Sleep Patterns: A Time-Use Study. https://doi.org/10.31219/osf.io/h2fv5	1	1082
22.7833	7.41667	23.0833	9.63333	15.4	Spain	0	Garcia-Roman et al.	2023	Garcia-Roman, J., Gracia, P., & Zerbini, G. (2023, September 7). Cross-National Variations in Adolescent Sleep Patterns: A Time-Use Study. https://doi.org/10.31219/osf.io/h2fv5	1	1083
22.5667	7.33333	23.2167	9.35	15.5	Spain	0	Garcia-Roman et al.	2023	Garcia-Roman, J., Gracia, P., & Zerbini, G. (2023, September 7). Cross-National Variations in Adolescent Sleep Patterns: A Time-Use Study. https://doi.org/10.31219/osf.io/h2fv5	1	1084
21.3167	6.08333	21.4333	7.33333	15.6	Spain	0	Garcia-Roman et al.	2023	Garcia-Roman, J., Gracia, P., & Zerbini, G. (2023, September 7). Cross-National Variations in Adolescent Sleep Patterns: A Time-Use Study. https://doi.org/10.31219/osf.io/h2fv5	1	1085
25.24	8.36	25.86	9.74	23.8	Canada	0	Smit et al.	2021	Smit AN, Juda M, Livingstone A, U SR, Mistlberger RE. Impact of COVID-19 social-distancing on sleep timing and duration during a university semester. PLoS One. 2021 Apr 26;16(4):e0250793. doi: 10.1371/journal.pone.0250793.	1	1086
24.1	8.1	24.2	8.4	39.6	Germany	0	Fernando et al.	2024	Fernando J, Ersche KD. Mismatch of Biological and Social Time in Cocaine-Addicted Men. Eur Addict Res. 2024;30(1):23-31. doi: 10.1159/000535219.	1	1087
23.6	7.5	23.8	8.2	32.1	USA	2	Chang et al.	2009	Chang AM, Reid KJ, Gourineni R, Zee PC. Sleep timing and circadian phase in delayed sleep phase syndrome. J Biol Rhythms. 2009 Aug;24(4):313-21. doi: 10.1177/0748730409339611.	1	1088
20.1417	7.05	20.925	7.49167	7.7	Australia	0	Biggs et al.	2013	Biggs SN, Lushington K, James Martin A, van den Heuvel C, Declan Kennedy J. Gender, socioeconomic, and ethnic differences in sleep patterns in school-aged children. Sleep Med. 2013 Dec;14(12):1304-9. doi: 10.1016/j.sleep.2013.06.014.	2	1089
22.4833	6.49167	24.8	10.7667	15.4	Switzerland	0	Perkinson-Gloor et al.	2013	Perkinson-Gloor N, Lemola S, Grob A. Sleep duration, positive attitude toward life, and academic achievement: the role of daytime tiredness, behavioral persistence, and school start times. J Adolesc. 2013 Apr;36(2):311-8. doi: 10.1016/j.adolescence.2012.11.008.	2	1090
23.15	7.24167	24.9083	10.5917	14.1	Spain	0	Arrona-Palacios & Díaz-Morales	2017	Arrona-Palacios A. & Díaz-Morales J.F. (2017) Morningness–eveningness and sleep habits at school: a comparative study between Mexico and Spain, Biological Rhythm Research, 48:2, 175-188, DOI: 10.1080/09291016.2016.1245459	2	1091
22.9917	6.18333	24.5	10.5	14.2	Mexico	0	Arrona-Palacios & Díaz-Morales	2017	Arrona-Palacios A. & Díaz-Morales J.F. (2017) Morningness–eveningness and sleep habits at school: a comparative study between Mexico and Spain, Biological Rhythm Research, 48:2, 175-188, DOI: 10.1080/09291016.2016.1245459	2	1092
25.6417	8.56667	25.7583	10.275	19.9	Hong Kong	0	Tsui & Wing	2009	Tsui YY, Wing YK. A study on the sleep patterns and problems of university business students in Hong Kong. J Am Coll Health. 2009 Sep-Oct;58(2):167-76. doi: 10.1080/07448480903221418.	2	1093
25.625	8.04167	25.275	8.76667	22	Malaysia	0	Say et al.	2024	Say, Y., Nordin, M. S., Ng, A. L. O. (2024). The effects of chrononutrition, chronotype and sleep behavior variabilities on adiposity traits and appetite sensations among a sample of urban Malaysian adults: a cross-sectional study. . 10.21203/rs.3.rs-5000893/v1	2	1094
23.0333	6.675	23.4333	7.69167	48.3	USA	0	Di et al.	2022	Di H, Guo Y, Daghlas I, Wang L, Liu G, Pan A, Liu L, Shan Z. Evaluation of Sleep Habits and Disturbances Among US Adults, 2017-2020. JAMA Netw Open. 2022 Nov 1;5(11):e2240788. doi: 10.1001/jamanetworkopen.2022.40788.	2	1095
23.8	7.175	24.78	9.245	35.075	Spain	0	Bonmatí-Carrión et al.	2024	Bonmatí-Carrión MÁ, Vicente-Martínez J, Madrid JA, Rol MA. The interplay among sleep patterns, social habits, and environmental cues: insights from the Spanish population and implications for aligning daily rhythms. Front Physiol. 2024 Oct 25;15:1323127. doi: 10.3389/fphys.2024.1323127.	2	1096
21.6908	7.66583	22.3375	8.62083	8	USA	2	Urbanek et al	2018	Urbanek JK, Spira AP, Di J, Leroux A, Crainiceanu C, Zipunnikov V. Epidemiology of objectively measured bedtime and chronotype in US adolescents and adults: NHANES 2003-2006. Chronobiol Int. 2018 Mar;35(3):416-434. doi: 10.1080/07420528.2017.1411359.	2	1097
22.2267	7.54	23.4083	9.13333	13	USA	2	Urbanek et al	2018	Urbanek JK, Spira AP, Di J, Leroux A, Crainiceanu C, Zipunnikov V. Epidemiology of objectively measured bedtime and chronotype in US adolescents and adults: NHANES 2003-2006. Chronobiol Int. 2018 Mar;35(3):416-434. doi: 10.1080/07420528.2017.1411359.	2	1098
23.44	8.53667	24.2958	9.3125	19	USA	2	Urbanek et al	2018	Urbanek JK, Spira AP, Di J, Leroux A, Crainiceanu C, Zipunnikov V. Epidemiology of objectively measured bedtime and chronotype in US adolescents and adults: NHANES 2003-2006. Chronobiol Int. 2018 Mar;35(3):416-434. doi: 10.1080/07420528.2017.1411359.	2	1099
22.6592	7.7275	23.7521	9.10625	25	USA	2	Urbanek et al	2018	Urbanek JK, Spira AP, Di J, Leroux A, Crainiceanu C, Zipunnikov V. Epidemiology of objectively measured bedtime and chronotype in US adolescents and adults: NHANES 2003-2006. Chronobiol Int. 2018 Mar;35(3):416-434. doi: 10.1080/07420528.2017.1411359.	2	1100
22.2375	7.31583	23.2833	8.84167	31	USA	2	Urbanek et al	2018	Urbanek JK, Spira AP, Di J, Leroux A, Crainiceanu C, Zipunnikov V. Epidemiology of objectively measured bedtime and chronotype in US adolescents and adults: NHANES 2003-2006. Chronobiol Int. 2018 Mar;35(3):416-434. doi: 10.1080/07420528.2017.1411359.	2	1101
22.1142	7.07917	23.0312	8.36875	37	USA	2	Urbanek et al	2018	Urbanek JK, Spira AP, Di J, Leroux A, Crainiceanu C, Zipunnikov V. Epidemiology of objectively measured bedtime and chronotype in US adolescents and adults: NHANES 2003-2006. Chronobiol Int. 2018 Mar;35(3):416-434. doi: 10.1080/07420528.2017.1411359.	2	1102
22.24	7.1	23.0292	8.17083	43	USA	2	Urbanek et al	2018	Urbanek JK, Spira AP, Di J, Leroux A, Crainiceanu C, Zipunnikov V. Epidemiology of objectively measured bedtime and chronotype in US adolescents and adults: NHANES 2003-2006. Chronobiol Int. 2018 Mar;35(3):416-434. doi: 10.1080/07420528.2017.1411359.	2	1103
22.2892	7.0175	22.8313	8.14375	49	USA	2	Urbanek et al	2018	Urbanek JK, Spira AP, Di J, Leroux A, Crainiceanu C, Zipunnikov V. Epidemiology of objectively measured bedtime and chronotype in US adolescents and adults: NHANES 2003-2006. Chronobiol Int. 2018 Mar;35(3):416-434. doi: 10.1080/07420528.2017.1411359.	2	1104
22.2775	7.10583	22.8854	8.19792	55	USA	2	Urbanek et al	2018	Urbanek JK, Spira AP, Di J, Leroux A, Crainiceanu C, Zipunnikov V. Epidemiology of objectively measured bedtime and chronotype in US adolescents and adults: NHANES 2003-2006. Chronobiol Int. 2018 Mar;35(3):416-434. doi: 10.1080/07420528.2017.1411359.	2	1105
22.0458	7.18083	22.2479	7.67708	61	USA	2	Urbanek et al	2018	Urbanek JK, Spira AP, Di J, Leroux A, Crainiceanu C, Zipunnikov V. Epidemiology of objectively measured bedtime and chronotype in US adolescents and adults: NHANES 2003-2006. Chronobiol Int. 2018 Mar;35(3):416-434. doi: 10.1080/07420528.2017.1411359.	2	1106
22.2967	7.58333	22.6042	7.82917	67	USA	2	Urbanek et al	2018	Urbanek JK, Spira AP, Di J, Leroux A, Crainiceanu C, Zipunnikov V. Epidemiology of objectively measured bedtime and chronotype in US adolescents and adults: NHANES 2003-2006. Chronobiol Int. 2018 Mar;35(3):416-434. doi: 10.1080/07420528.2017.1411359.	2	1107
22.1217	7.52167	22.3021	7.83125	73	USA	2	Urbanek et al	2018	Urbanek JK, Spira AP, Di J, Leroux A, Crainiceanu C, Zipunnikov V. Epidemiology of objectively measured bedtime and chronotype in US adolescents and adults: NHANES 2003-2006. Chronobiol Int. 2018 Mar;35(3):416-434. doi: 10.1080/07420528.2017.1411359.	2	1108
21.9692	7.34083	22.1625	7.62083	80	USA	2	Urbanek et al	2018	Urbanek JK, Spira AP, Di J, Leroux A, Crainiceanu C, Zipunnikov V. Epidemiology of objectively measured bedtime and chronotype in US adolescents and adults: NHANES 2003-2006. Chronobiol Int. 2018 Mar;35(3):416-434. doi: 10.1080/07420528.2017.1411359.	2	1109
23.1917	7.40833	23.7583	9.08333	14.5	France	2	Reynaud et al	2024	Reynaud E, Berthier J, Louis E, Eyuboğlu E, Scelles R, Schröder CM. Interconnection between adolescents' and family members' sleep. Sci Rep. 2024 Nov 15;14(1):28244. doi: 10.1038/s41598-024-76597-2.	2	1110
23.6167	7.05	23.9167	8.125	45.5	France	2	Reynaud et al	2024	Reynaud E, Berthier J, Louis E, Eyuboğlu E, Scelles R, Schröder CM. Interconnection between adolescents' and family members' sleep. Sci Rep. 2024 Nov 15;14(1):28244. doi: 10.1038/s41598-024-76597-2.	2	1111
23.525	7.74167	24.4417	9.25833	25.6	UK	0	Santhi et al	2016	Santhi N, Lazar AS, McCabe PJ, Lo JC, Groeger JA, Dijk DJ. Sex differences in the circadian regulation of sleep and waking cognition in humans. Proc Natl Acad Sci U S A. 2016 May 10;113(19):E2730-9. doi: 10.1073/pnas.1521637113.	2	1112
23.175	6.275	23.7167	8.11667	46.9	Sweden	0	Åkerstedt et al	2024	Åkerstedt T, Eriksson J, Freyland S, Widman L, Magnusson Hanson LL, Miley-Åkerstedt A. Changes in Sleep Quality, Sleep Duration, and Sickness Absence: A Longitudinal Study with Repeated Measures. Healthcare (Basel). 2024 Jul 11;12(14):1393. doi: 10.3390/healthcare12141393.	2	1113
25.5583	8.55	25.55	9.425	21.8	Taiwan	1	Tsai et al	2004	Tsai LL, Li SP. Sleep patterns in college students: gender and grade differences. J Psychosom Res. 2004 Feb;56(2):231-7. doi: 10.1016/S0022-3999(03)00507-5.	2	1114
24.675	6.61667	25.3	9.59167	17.3	Korea	0	Kim et al	2011	Kim SJ, Lee YJ, Cho SJ, Cho IH, Lim W, Lim W. Relationship between weekend catch-up sleep and poor performance on attention tasks in Korean adolescents. Arch Pediatr Adolesc Med. 2011 Sep;165(9):806-12. doi: 10.1001/archpediatrics.2011.128.	2	1115
21.4833	7.76667	22.0917	8.71667	23.6	Portugal	0	Duarte et al	2024	Duarte A, Martins S, Augusto C, Silva MJ, Lopes L, Santos R, Martins J, Rosário R. Associations between sleep opportunity, sleep problems, and social jetlag and toddlers' adiposity: A cross-sectional study. Sleep Med. 2024 Dec 10;126:172-177. doi: 10.1016/j.sleep.2024.12.006.	2	1116
23.05	5.95833	23.9917	8.75833	16.1	Brasil	0	Diogo et al	2024	Diogo FMC, Bessa ZCM, Galina SD, Oliveira MLC, Silva-Júnior ELRD, Valdez P, Azevedo CVM. Sex Differences in Temporal Sleep Patterns, Social Jetlag, and Attention in High School Adolescents. Sleep Sci. 2024 Feb 15;17(2):e125-e133. doi: 10.1055/s-0043-1777831.	2	1117
24.2667	7.72	25.625	9.28667	17.3	Iceland	1	Magnusdottir et al	2024	Magnusdottir S, Magnusdottir I, Gunnlaugsdottir AK, Hilmisson H, Hrolfsdottir L, Paed AEEM. Sleep duration and social jetlag in healthy adolescents. Association with anxiety, depression, and chronotype: a pilot study. Sleep Breath. 2024 Aug;28(4):1541-1551. doi: 10.1007/s11325-024-03026-z.	2	1118
23.075	7.36667	24.7083	10.625	13.9	Spain	0	Díaz-Morales	2024	Díaz-Morales, J.F. Anxiety during adolescence: considering morningness–eveningness as a risk factor. Sleep Biol. Rhythms 14, 141–147 (2016). https://doi.org/10.1007/s41105-015-0032-8	2	1119
21.9833	5.58333	22.5	7.85833	11.5	India	0	Singh et al	2018	Singh R, Suri JC, Sharma R, Suri T, Adhikari T. Sleep Pattern of Adolescents in a School in Delhi, India: Impact on their Mood and Academic Performance. Indian J Pediatr. 2018 Oct;85(10):841-848. doi: 10.1007/s12098-018-2647-7.	2	1120
22	5.58333	22.525	7.96667	12.5	India	0	Singh et al	2018	Singh R, Suri JC, Sharma R, Suri T, Adhikari T. Sleep Pattern of Adolescents in a School in Delhi, India: Impact on their Mood and Academic Performance. Indian J Pediatr. 2018 Oct;85(10):841-848. doi: 10.1007/s12098-018-2647-7.	2	1121
22.2917	5.54167	22.8083	8.15	13.5	India	0	Singh et al	2018	Singh R, Suri JC, Sharma R, Suri T, Adhikari T. Sleep Pattern of Adolescents in a School in Delhi, India: Impact on their Mood and Academic Performance. Indian J Pediatr. 2018 Oct;85(10):841-848. doi: 10.1007/s12098-018-2647-7.	2	1122
22.4417	5.60833	22.9	8.1	14.5	India	0	Singh et al	2018	Singh R, Suri JC, Sharma R, Suri T, Adhikari T. Sleep Pattern of Adolescents in a School in Delhi, India: Impact on their Mood and Academic Performance. Indian J Pediatr. 2018 Oct;85(10):841-848. doi: 10.1007/s12098-018-2647-7.	2	1123
22.5833	5.68333	22.775	8.3	15.5	India	0	Singh et al	2018	Singh R, Suri JC, Sharma R, Suri T, Adhikari T. Sleep Pattern of Adolescents in a School in Delhi, India: Impact on their Mood and Academic Performance. Indian J Pediatr. 2018 Oct;85(10):841-848. doi: 10.1007/s12098-018-2647-7.	2	1124
24.1167	6.875	24.1167	7.14167	40.4	Japan	0	Minabe et al	2024	Minabe K, Shimura A, Sugiura K, Hino H, Akatsuka Y, Seto T, Yanai M, Masuya J, Tamada Y, Inoue T. Association between social jetlag and weight and fat reduction in dieting. Sleep Biol Rhythms. 2024 Jun 24;22(4):513-521. doi: 10.1007/s41105-024-00539-8.	2	1125
22.3667	6.96667	24	10.1333	14.1	Norway	0	Grasaas et al	2023	Grasaas E, Rohde G, Haraldstad K, Helseth S, Småstuen MC, Skarstein S, Mikkelsen HT. Sleep duration in schooldays is associated with health-related quality of life in norwegian adolescents: a cross-sectional study. BMC Pediatr. 2023 Sep 19;23(1):473. doi: 10.1186/s12887-023-04306-5.	2	1126
24.2833	7.475	24.8833	8.86667	20.1	China	0	Zhang et al	2018	Zhang, Y., Liu, D., Sheng, L. et al. Chronotype and sleep duration are associated with stimulant consumption and BMI among Chinese undergraduates. Sleep Biol. Rhythms 16, 211–222 (2018). https://doi.org/10.1007/s41105-017-0142-6	2	1127
22.375	6.875	23.8333	9.58333	14.5	Italy	0	Giannotti et al	2005	Giannotti, F., Cortesi, F., Sebastiani, T. et al. Sleeping habits in Italian children and adolescents. Sleep Biol. Rhythms 3, 15–21 (2005). https://doi.org/10.1111/j.1479-8425.2005.00155.x (from Giannotti F, Cortesi F. Sleep Patterns and Daytime Function in Adolescence: An Epidemiological Survey of an Italian High School Student Sample. In: Carskadon MA, ed. Adolescent Sleep Patterns: Biological,…	2	1128
22.5833	6.875	24.2083	9.625	15.5	Italy	0	Giannotti et al	2005	Giannotti, F., Cortesi, F., Sebastiani, T. et al. Sleeping habits in Italian children and adolescents. Sleep Biol. Rhythms 3, 15–21 (2005). https://doi.org/10.1111/j.1479-8425.2005.00155.x (from Giannotti F, Cortesi F. Sleep Patterns and Daytime Function in Adolescence: An Epidemiological Survey of an Italian High School Student Sample. In: Carskadon MA, ed. Adolescent Sleep Patterns: Biological,…	2	1129
22.9167	6.91667	24.625	9.875	16.5	Italy	0	Giannotti et al	2005	Giannotti, F., Cortesi, F., Sebastiani, T. et al. Sleeping habits in Italian children and adolescents. Sleep Biol. Rhythms 3, 15–21 (2005). https://doi.org/10.1111/j.1479-8425.2005.00155.x (from Giannotti F, Cortesi F. Sleep Patterns and Daytime Function in Adolescence: An Epidemiological Survey of an Italian High School Student Sample. In: Carskadon MA, ed. Adolescent Sleep Patterns: Biological,…	2	1130
23.2083	7	25.0417	10.0833	17.5	Italy	0	Giannotti et al	2005	Giannotti, F., Cortesi, F., Sebastiani, T. et al. Sleeping habits in Italian children and adolescents. Sleep Biol. Rhythms 3, 15–21 (2005). https://doi.org/10.1111/j.1479-8425.2005.00155.x (from Giannotti F, Cortesi F. Sleep Patterns and Daytime Function in Adolescence: An Epidemiological Survey of an Italian High School Student Sample. In: Carskadon MA, ed. Adolescent Sleep Patterns: Biological,…	2	1131
24.5417	7	25.75	10.25	18.5	Italy	0	Giannotti et al	2005	Giannotti, F., Cortesi, F., Sebastiani, T. et al. Sleeping habits in Italian children and adolescents. Sleep Biol. Rhythms 3, 15–21 (2005). https://doi.org/10.1111/j.1479-8425.2005.00155.x (from Giannotti F, Cortesi F. Sleep Patterns and Daytime Function in Adolescence: An Epidemiological Survey of an Italian High School Student Sample. In: Carskadon MA, ed. Adolescent Sleep Patterns: Biological,…	2	1132
23.2833	6.78333	25.55	11.2417	16.9	Norway	0	Sivertsen et al	2014	Sivertsen B, Harvey AG, Lundervold AJ, Hysing M. Sleep problems and depression in adolescence: results from a large population-based study of Norwegian adolescents aged 16-18 years. Eur Child Adolesc Psychiatry. 2014 Aug;23(8):681-9. doi: 10.1007/s00787-013-0502-y.	2	1133
23.12	7.02	23.76	9.28	13.5	Korea	0	Kim et al	2019	Kim J, Noh JW, Kim A, Kwon YD. Relationships between Sleep Patterns, Health Risk Behaviors, and Health Outcomes among School-Based Population of Adolescents: A Panel Analysis of the Korean Children and Youth Panel Survey. Int J Environ Res Public Health. 2019 Jun 27;16(13):2278. doi: 10.3390/ijerph16132278.	2	1134
23.34	7.01	23.9	9.3	14.5	Korea	0	Kim et al	2019	Kim J, Noh JW, Kim A, Kwon YD. Relationships between Sleep Patterns, Health Risk Behaviors, and Health Outcomes among School-Based Population of Adolescents: A Panel Analysis of the Korean Children and Youth Panel Survey. Int J Environ Res Public Health. 2019 Jun 27;16(13):2278. doi: 10.3390/ijerph16132278.	2	1135
23.66	7.02	24.35	9.49	15.5	Korea	0	Kim et al	2019	Kim J, Noh JW, Kim A, Kwon YD. Relationships between Sleep Patterns, Health Risk Behaviors, and Health Outcomes among School-Based Population of Adolescents: A Panel Analysis of the Korean Children and Youth Panel Survey. Int J Environ Res Public Health. 2019 Jun 27;16(13):2278. doi: 10.3390/ijerph16132278.	2	1136
24.28	6.59	24.86	9.39	16.5	Korea	0	Kim et al	2019	Kim J, Noh JW, Kim A, Kwon YD. Relationships between Sleep Patterns, Health Risk Behaviors, and Health Outcomes among School-Based Population of Adolescents: A Panel Analysis of the Korean Children and Youth Panel Survey. Int J Environ Res Public Health. 2019 Jun 27;16(13):2278. doi: 10.3390/ijerph16132278.	2	1137
24.57	6.69	25.1	9.42	17.5	Korea	0	Kim et al	2019	Kim J, Noh JW, Kim A, Kwon YD. Relationships between Sleep Patterns, Health Risk Behaviors, and Health Outcomes among School-Based Population of Adolescents: A Panel Analysis of the Korean Children and Youth Panel Survey. Int J Environ Res Public Health. 2019 Jun 27;16(13):2278. doi: 10.3390/ijerph16132278.	2	1138
24.51	6.83	25.17	9.42	18.5	Korea	0	Kim et al	2019	Kim J, Noh JW, Kim A, Kwon YD. Relationships between Sleep Patterns, Health Risk Behaviors, and Health Outcomes among School-Based Population of Adolescents: A Panel Analysis of the Korean Children and Youth Panel Survey. Int J Environ Res Public Health. 2019 Jun 27;16(13):2278. doi: 10.3390/ijerph16132278.	2	1139
22.6417	6.75	24.3833	10.6167	14.6	Israel	0	Shochat et al	2013	Shochat, T. Sleep patterns and daytime sleep-related behaviors in male and female Arab and Jewish adolescents in Israel. Sleep Biol. Rhythms 11, 82–89 (2013). https://doi.org/10.1111/sbr.12008	2	1140
23.0167	6.99167	25.625	11.0833	14.7	Israel	0	Shochat et al	2013	Shochat, T. Sleep patterns and daytime sleep-related behaviors in male and female Arab and Jewish adolescents in Israel. Sleep Biol. Rhythms 11, 82–89 (2013). https://doi.org/10.1111/sbr.12008	2	1141
23.15	6.85	24	9.88	14.6	Hong Kong	0	Chen et al.	2024	Chen CX, Zhang JH, Li SX, Chan KCC, Li AM, Kong APS, Chan JWY, Wing YK, Chan NY. Secular trends in sleep and circadian problems among adolescents in Hong Kong: From 2011-2012 to 2017-2019. Sleep Med. 2024 May;117:62-70. doi: 10.1016/j.sleep.2024.03.003.	2	1142
20.2833	7.11667	20.7833	7.85	6.7	Switzerland	0	Werner et al	2009	Werner H, Lebourgeois MK, Geiger A, Jenni OG. Assessment of chronotype in four- to eleven-year-old children: reliability and validity of the Children's Chronotype Questionnaire (CCTQ). Chronobiol Int. 2009 Jul;26(5):992-1014. doi: 10.1080/07420520903044505.	2	1143
20.6833	7.13333	31.2167	7.95	6.7	Switzerland	1	Werner et al	2009	Werner H, Lebourgeois MK, Geiger A, Jenni OG. Assessment of chronotype in four- to eleven-year-old children: reliability and validity of the Children's Chronotype Questionnaire (CCTQ). Chronobiol Int. 2009 Jul;26(5):992-1014. doi: 10.1080/07420520903044505.	2	1144
20.8167	7	21.5167	7.7	6.7	Switzerland	2	Werner et al	2009	Werner H, Lebourgeois MK, Geiger A, Jenni OG. Assessment of chronotype in four- to eleven-year-old children: reliability and validity of the Children's Chronotype Questionnaire (CCTQ). Chronobiol Int. 2009 Jul;26(5):992-1014. doi: 10.1080/07420520903044505.	2	1145
21.75	6.83333	23.1667	8.75	11.3	Israel	0	Roth et al	2019	Roth N, Lev-Wiesel R, Shochat T. "How do you sleep?" sleep in self-figure drawings of young adolescents in residential care facilities-An exploratory study. Sleep Med. 2019 Aug;60:116-122. doi: 10.1016/j.sleep.2019.01.028.	2	1146
23.525	7.89	24.25	8.91	49.2	Portugal	0	Paiva et al	2021	Paiva T, Reis C, Feliciano A, Canas-Simião H, Machado MA, Gaspar T, Tomé G, Branquinho C, Silva MR, Ramiro L, Gaspar S, Bentes C, Sampaio F, Pinho L, Pereira C, Carreiro A, Moreira S, Luzeiro I, Pimentel J, Videira G, Fonseca J, Bernarda A, Vaz Castro J, Rebocho S, Almondes K, Canhão H, Matos MG. Sleep and Awakening Quality during COVID-19 Confinement: Complexity and Relevance for Health and Beha…	2	1147
23.31	6.69	24.44	8.67	38.2	Germany	0	Ujma et al	2020	Ujma PP, Baudson TG, Bódizs R, Dresler M. The relationship between chronotype and intelligence: the importance of work timing. Sci Rep. 2020 Apr 28;10(1):7105. doi: 10.1038/s41598-020-62917-9.	2	1148
23.35	6.91	24.28	8.75	38.2	Germany	0	Ujma et al	2020	Ujma PP, Baudson TG, Bódizs R, Dresler M. The relationship between chronotype and intelligence: the importance of work timing. Sci Rep. 2020 Apr 28;10(1):7105. doi: 10.1038/s41598-020-62917-9.	2	1149
22.9417	5.35833	23.7167	8.08333	31	Portugal	0	Gamboa Madeira et al	2021	Gamboa Madeira S, Reis C, Paiva T, Moreira CS, Nogueira P, Roenneberg T. Social jetlag, a novel predictor for high cardiovascular risk in blue-collar workers following permanent atypical work schedules. J Sleep Res. 2021 Dec;30(6):e13380. doi: 10.1111/jsr.13380.	2	1150
24.1333	6.6	24.8333	8.63333	17.7	Korea	0	Lee et al	2015	Lee YJ, Park J, Kim S, Cho SJ, Kim SJ. Academic performance among adolescents with behaviorally induced insuffi cient sleep syndrome. J Clin Sleep Med 2015;11(1):61–68	2	1151
25.1833	8.25	25.9167	9.5	22.2	Japan	0	Ohashi et al	2023	Ohashi M, Eto T, Takasu T, Motomura Y, Higuchi S. Relationship between Circadian Phase Delay without Morning Light and Phase Advance by Bright Light Exposure the Following Morning. Clocks Sleep. 2023 Oct 23;5(4):615-626. doi: 10.3390/clockssleep5040041.	2	1152
23.1	6.4	23.5	8.4	25.8	Australia	2	Micic et al	2021	Micic G, Lovato N, Ferguson SA, Burgess HJ, Lack L. Circadian tau differences and rhythm associations in delayed sleep-wake phase disorder and sighted non-24-hour sleep-wake rhythm disorder. Sleep. 2021 Jan 21;44(1):zsaa132. doi: 10.1093/sleep/zsaa132.	2	1153
22.5667	6.05	22.9833	6.65	46.4	South Africa	2	Pienaar et al	2024	Pienaar PR, Roden LC, Boot CRL, van Mechelen W, Suter JA, Lambert EV, Rae DE. Associations between habitual sleep characteristics and cardiometabolic disease risk in corporate executives. Sleep Health. 2024 Oct;10(5):550-557. doi: 10.1016/j.sleh.2024.07.007.	2	1154
25.2583	6.675	25.0917	8.175	15.6	France	2	Souabni et al	2024	Souabni MJ, Souabni M, Hammouda O, Driss T. Are Adolescent Athletes Sleeping Enough? An Observational Study of Sleep Parameters during Schooldays and Holidays. Children (Basel). 2024 Aug 27;11(9):1044. doi: 10.3390/children11091044.	2	1155
24.4167	7.43333	25.4167	10.0833	17	Sweden	1	Eckerberg et al	2012	Eckerberg B, Lowden A, Nagai R, Akerstedt T. Melatonin treatment effects on adolescent students' sleep timing and sleepiness in a placebo-controlled crossover study. Chronobiol Int. 2012 Nov;29(9):1239-48. doi: 10.3109/07420528.2012.719962.	2	1156
21.7667	6.2	23.8	9.71667	13.4	Germany	0	Randler et al	2016	Randler C, Wolfgang L, Matt K, Demirhan E, Horzum MB, Beşoluk Ş. Smartphone addiction proneness in relation to sleep and morningness-eveningness in German adolescents. J Behav Addict. 2016 Sep;5(3):465-73. doi: 10.1556/2006.5.2016.056.	2	1157
22.5167	6.25	24.5333	10.1167	17.1	Germany	0	Randler et al	2016	Randler C, Wolfgang L, Matt K, Demirhan E, Horzum MB, Beşoluk Ş. Smartphone addiction proneness in relation to sleep and morningness-eveningness in German adolescents. J Behav Addict. 2016 Sep;5(3):465-73. doi: 10.1556/2006.5.2016.056.	2	1158
23.1333	6.43333	23.4833	8.63333	23.7	Australia	1	Micic et al	2016	Micic G, Lovato N, Gradisar M, Burgess HJ, Ferguson SA, Lack L. Circadian Melatonin and Temperature Taus in Delayed Sleep-wake Phase Disorder and Non-24-hour Sleep-wake Rhythm Disorder Patients: An Ultradian Constant Routine Study. J Biol Rhythms. 2016 Aug;31(4):387-405. doi: 10.1177/0748730416650069.	2	1159
24.3167	7.11667	25.3667	9.68333	22	Korea	0	Kim et al	2010	Kim HS, Eom MR, Kim EK. [Sleep patterns and circadian types of nursing students during shift schedules]. J Korean Acad Nurs. 2010 Feb;40(1):43-51. Korean. doi: 10.4040/jkan.2010.40.1.43.	2	1160
22.3056	6.21667	23.7917	9.14444	13.5	Brasil	0	Andrade et al	1993	Andrade MM, Benedito-Silva AA, Domenice S, Arnhold IJ, Menna-Barreto L. Sleep characteristics of adolescents: a longitudinal study. J Adolesc Health. 1993 Jul;14(5):401-6. doi: 10.1016/s1054-139x(08)80016-x.	2	1161
21.65	7	22.7167	8	10.5	USA	0	Crowley et al	2006	Crowley SJ, Acebo C, Fallone G, Carskadon MA. Estimating dim light melatonin onset (DLMO) phase in adolescents using summer or school-year sleep/wake schedules. Sleep. 2006 Dec;29(12):1632-41. doi: 10.1093/sleep/29.12.1632.	2	1162
22.6167	7.13333	23.15	8.65	14.5	USA	0	Crowley et al	2006	Crowley SJ, Acebo C, Fallone G, Carskadon MA. Estimating dim light melatonin onset (DLMO) phase in adolescents using summer or school-year sleep/wake schedules. Sleep. 2006 Dec;29(12):1632-41. doi: 10.1093/sleep/29.12.1632.	2	1163
24.4	8.85	25.85	10.0833	21.5	USA	0	Figueiro et al	2014	Figueiro MG, Plitnick B, Rea MS. The effects of chronotype, sleep schedule and light/dark pattern exposures on circadian phase. Sleep Med. 2014 Dec;15(12):1554-64. doi: 10.1016/j.sleep.2014.07.009.	2	1164
22.7	6.53333	23.1167	7.41667	40	USA	0	Figueiro et al	2014	Figueiro MG, Plitnick B, Rea MS. The effects of chronotype, sleep schedule and light/dark pattern exposures on circadian phase. Sleep Med. 2014 Dec;15(12):1554-64. doi: 10.1016/j.sleep.2014.07.009.	2	1165
22.5039	7.40858	23.3344	10.0261	10.1	Turkey	0	Akçay&Akçay	2023	Akçay D., Akçay B.D. Evaluation of the Relationship Between Students’ Breakfast Habits and Chronotype: A Cross-Sectional Study. Türkiye Klinikleri Hemşirelik Bilimleri Dergisi, 2023: 15(3), 668-677	2	1166
22.7064	6.41182	23.1412	7.86331	12.5	Japan	0	Tamura et al	2019	Tamura N, Tanaka H, Komada Y, Narisawa H, Inoue Y. 2019.Discrepancy in wake-up time on school days and free days isassociated with daytime sleepiness, lowered mental/physical health and poor academic performance. Jpn J Psychol.90:378–388. doi:10.4992/jjpsy.90.18045.	2	1167
23.0254	6.53313	23.514	8.13375	13.5	Japan	0	Tamura et al	2019	Tamura N, Tanaka H, Komada Y, Narisawa H, Inoue Y. 2019.Discrepancy in wake-up time on school days and free days isassociated with daytime sleepiness, lowered mental/physical health and poor academic performance. Jpn J Psychol.90:378–388. doi:10.4992/jjpsy.90.18045.	2	1168
23.5265	6.7968	23.9803	8.6428	14.5	Japan	0	Tamura et al	2019	Tamura N, Tanaka H, Komada Y, Narisawa H, Inoue Y. 2019.Discrepancy in wake-up time on school days and free days isassociated with daytime sleepiness, lowered mental/physical health and poor academic performance. Jpn J Psychol.90:378–388. doi:10.4992/jjpsy.90.18045.	2	1169
20.9833	6.86667	22.0667	8.51667	12.9	Australia	0	Magee&Blunden	2020	Magee CA, Blunden S. Sleep Timing During Adolescence: A Latent Transition Analysis Approach. Behav Sleep Med. 2020 Jan-Feb;18(1):131-146. doi: 10.1080/15402002.2018.1546180.	2	1170
23.2417	6.76667	23.7667	7.20833	40	UK	0	Martín-Olalla	2019	Martín-Olalla J.Life under Daylight Saving Time regulations: why should we think twice before abolishing DST? Economics, Sociology 2019 (Martín-Olalla JM. The long term impact of Daylight Saving Time regulations in daily life at several circles of latitude. Sci Rep. 2019 Dec 5;9(1):18466. doi: 10.1038/s41598-019-54990-6.)	2	1171
23.2417	6.65	23.85	7.35833	40	France	0	Martín-Olalla	2019	Martín-Olalla J.Life under Daylight Saving Time regulations: why should we think twice before abolishing DST? Economics, Sociology 2019 (Martín-Olalla JM. The long term impact of Daylight Saving Time regulations in daily life at several circles of latitude. Sci Rep. 2019 Dec 5;9(1):18466. doi: 10.1038/s41598-019-54990-6.)	2	1172
23.1333	6.76667	23.5917	6.98333	40	Italy	0	Martín-Olalla	2019	Martín-Olalla J.Life under Daylight Saving Time regulations: why should we think twice before abolishing DST? Economics, Sociology 2019 (Martín-Olalla JM. The long term impact of Daylight Saving Time regulations in daily life at several circles of latitude. Sci Rep. 2019 Dec 5;9(1):18466. doi: 10.1038/s41598-019-54990-6.)	2	1173
23.8667	7.03333	24.4083	7.5	40	Spain	0	Martín-Olalla	2019	Martín-Olalla J.Life under Daylight Saving Time regulations: why should we think twice before abolishing DST? Economics, Sociology 2019 (Martín-Olalla JM. The long term impact of Daylight Saving Time regulations in daily life at several circles of latitude. Sci Rep. 2019 Dec 5;9(1):18466. doi: 10.1038/s41598-019-54990-6.)	2	1174
22.85	6.11667	23.3083	6.94167	40	USA	0	Martín-Olalla	2019	Martín-Olalla J.Life under Daylight Saving Time regulations: why should we think twice before abolishing DST? Economics, Sociology 2019 (Martín-Olalla JM. The long term impact of Daylight Saving Time regulations in daily life at several circles of latitude. Sci Rep. 2019 Dec 5;9(1):18466. doi: 10.1038/s41598-019-54990-6.)	2	1175
23.3833	6.83333	23.9	8.35	27	Japan	0	Hoshikawa et al	2021	Hoshikawa M. Chronotypes in elite Japanese athletes: assessed by the reduced Morningness-Eveningness and Munich ChronoType Questionnaires. Chronobiol Int. 2021 Jun;38(6):820-829. doi: 10.1080/07420528.2021.1897608.	2	1176
24.4	7.5	24.8167	8.21667	49.7	Spain	0	Barnadas Solé et al	2021	Barnadas Solé C, Zerón Rugerio MF, Foncillas Corvinos J, Díez-Noguera A, Cambras T, Izquierdo-Pulido M. Sleeve gastrectomy in patients with severe obesity restores circadian rhythms and their relationship with sleep pattern. Chronobiol Int. 2021 Apr;38(4):565-575. doi: 10.1080/07420528.2020.1866003.	2	1177
22.5	7.21667	23.2167	9.36667	10	Russia	0	Kolomeichuk et al	2021	Kolomeichuk SN, Randler C, Morozov AV, Gubin DG, Drake CL. Social Jetlag and Excessive Daytime Sleepiness from a Sample of Russian Children and Adolescents. Nat Sci Sleep. 2021 Jun 4;13:729-737. doi: 10.2147/NSS.S290895.	2	1178
23.4167	7.08333	24.4667	9.95	15	Russia	0	Kolomeichuk et al	2021	Kolomeichuk SN, Randler C, Morozov AV, Gubin DG, Drake CL. Social Jetlag and Excessive Daytime Sleepiness from a Sample of Russian Children and Adolescents. Nat Sci Sleep. 2021 Jun 4;13:729-737. doi: 10.2147/NSS.S290895.	2	1179
24.0167	7.06667	24.8833	9.86667	16	Russia	0	Kolomeichuk et al	2021	Kolomeichuk SN, Randler C, Morozov AV, Gubin DG, Drake CL. Social Jetlag and Excessive Daytime Sleepiness from a Sample of Russian Children and Adolescents. Nat Sci Sleep. 2021 Jun 4;13:729-737. doi: 10.2147/NSS.S290895.	2	1180
23.0833	6.51667	24.3	8.68333	31.6	USA	0	Soehner et al	2007	Soehner AM, Kennedy KS, Monk TH. Personality correlates with sleep-wake variables. Chronobiol Int. 2007;24(5):889-903. doi: 10.1080/07420520701648317.	2	1181
23.3364	6.93258	23.6456	8.37117	16	Japan	0	Kohyama et al	2020	Kohyama J. Pupils with negative social jetlag in Japan are hypothesised to constitute a discrete population. Med Hypotheses. 2020 Nov;144:110249. doi: 10.1016/j.mehy.2020.110249.	2	1182
22.3	6.65	23.1	8.91667	11.6	Taiwan	0	Shur-Fen Gau et al	2006	Shur-Fen Gau S. Prevalence of sleep problems and their association with inattention/hyperactivity among children aged 6-15 in Taiwan. J Sleep Res. 2006 Dec;15(4):403-14. doi: 10.1111/j.1365-2869.2006.00552.x.	2	1183
23.05	7.73333	23.2333	8.16667	14.9	Canada	1	Lau et al	2024	Lau PH, Carney CE. Implementation of a teen sleep app in Canadian high schools: Preliminary evidence of acceptability, engagement, and capacity for supporting healthy sleep habits. J Sleep Res. 2024 Dec;33(6):e14199. doi: 10.1111/jsr.14199.	2	1184
22.25	6.78333	24.1833	10.0667	14	France	0	Rolling et al	2024	Rolling J, Ligier F, Rabot J, Bourgin P, Reynaud E, Schroder CM. Sleep and circadian rhythms in adolescents with attempted suicide. Sci Rep. 2024 Apr 9;14(1):8354. doi: 10.1038/s41598-024-57921-2.	2	1185
23.6167	6.2	24.1	9.15	16.8	Singapore	0	Ong et al	2022	Ong JL, Jamaluddin SA, Tandi J, Chee NIYN, Leong RLF, Huber R, Lo JC, Chee MWL. Cortical thinning and sleep slow wave activity reductions mediate age-related improvements in cognition during mid-late adolescence. Sleep. 2022 Jan 11;45(1):zsab206. doi: 10.1093/sleep/zsab206.	2	1186
21.8333	7.75833	22.6917	9.25	8.9	Portugal	0	Clara et al	2024	Clara MI, Clemente V, Abrantes J, Marques DR, Azevedo MHP, Allen Gomes A. Sleep-wake patterns and disturbances in Portuguese primary school children: a comparison between 1995 and 2016. Sleep Biol Rhythms. 2022 Jul 1;20(4):541-549. doi: 10.1007/s41105-022-00400-w.	2	1187
23.6	7.2	24.2667	8.75	44.9	Italy	0	Manni et al	2024	Manni R, Cremascoli R, De Icco R, Terzaghi M. Chronotype in patients with epilepsy: A controlled study in 60 subjects with late-onset focal epilepsy. Epilepsy Behav. 2015 Sep;50:1-6. doi: 10.1016/j.yebeh.2015.05.031.	2	1188
22.8167	6.61667	25.15	9.96667	16.1	Sweden	0	Sancho-Domingo et al	2024	Sancho-Domingo C, Garmy P, Norell A. Nighttime Texting on Social Media, Sleep Parameters, and Adolescent Sadness: A Mediation Analysis. Behav Sleep Med. 2024 Jul-Aug;22(4):488-498. doi: 10.1080/15402002.2024.2314281.	2	1189
22.8167	7.4	23.85	8.76667	27.7	Brasil	0	Pereira et al	2024	Pereira C S, Balieiro L C, Teixeira G P et al. Association between Eating-Fasting and Sleep-Wake Cycles with Eating Times and Food Consumption throughout the Day: Longitudinal Study with Pregnant Women. Sleep Science 2024 (efirst). doi:10.1055/s-0044-1787276	2	1190
21.5601	6.21272	21.7799	7.73393	11.9	China	0	Jiang et al	2024	Jiang Y, Yu T, Fan J, Guo X, Hua H, Xu D, Wang Y, Yan CH, Xu J. Longitudinal associations of social jetlag with obesity indicators among adolescents - Shanghai adolescent cohort. Sleep Med. 2024 Sep;121:171-178. doi: 10.1016/j.sleep.2024.07.001.	2	1191
24.8583	6.675	25.55	8.61667	20.5	Japan	0	Shibata et al	2024	Shibata M, Fujibayashi M, Shibata S, Kuzuhara K, Tanida K. Association between Social Jetlag and Objective Physical Activity among Female University Students of Japan: A Cross-Sectional Study. Sleep Sci. 2024 Feb 20;17(2):e151-e156. doi: 10.1055/s-0043-1777777.	2	1192
23.5833	7.36667	23.7167	7.75	40.9	France	0	Coelho et al	2024	Coelho J, Micoulaud-Franchi JA, D'incau E, Bourgin P, Gronfier C, Leger D, Galvez P, Philip P, Taillard J. Validation of the French version of the Munich ChronoType questionnaire and associations between chronotype and physiological parameters. Chronobiol Int. 2024 Jul;41(7):996-1007. doi: 10.1080/07420528.2024.2362309.	2	1193
24.535	8.225	26.125	10.595	23.1	Antarctica	0	Tassino et al	2024	Tassino B, Horta S, Santana N, Levandovski R, Silva A. Extreme late chronotypes and social jetlag challenged by Antarctic conditions in a population of university students from Uruguay. Sleep Sci. 2016 Jan-Mar;9(1):20-8. doi: 10.1016/j.slsci.2016.01.002.	2	1194
26.01	7.45	26.865	10.415	23.1	Antarctica	1	Tassino et al	2024	Tassino B, Horta S, Santana N, Levandovski R, Silva A. Extreme late chronotypes and social jetlag challenged by Antarctic conditions in a population of university students from Uruguay. Sleep Sci. 2016 Jan-Mar;9(1):20-8. doi: 10.1016/j.slsci.2016.01.002.	2	1195
25.655	7.105	27.25	9.47	20.8	Japan	2	Yoshizaki et al	2024	Yoshizaki T, Togo F. Objectively measured chronotype and social jetlag are associated with habitual dietary intake in undergraduate students. Nutr Res. 2021 Jun;90:36-45. doi: 10.1016/j.nutres.2021.04.003.	2	1196
23.6167	8.08333	23.6333	8.21667	20.6	China	1	Li et al	2024	Li Y., Qingwei Chen, Meiheng He, Siyu Li, Yuping Chen, Taotao Ru, Guofu Zhou. Investigation of bi-directional relations between pre-sleep electronic media use and sleep: A seven-day dairy study. Comput. Hum. Behav. 161: 108423 (2024)	2	1197
20.96	6.01	20.77	6.64	16.1	India	0	Sauraj&Sultana	2024	Sauraj E. and Sultana R. Chronotype and lifestyle schedule in healthy rural population in South eastern region of Chhattisgarh. Bionature, 2024, 44 (2), 20-30	2	1198
21.6576	6.63714	21.4283	7.25119	5.5	Japan	0	Furutani et al	2024	Furutani A, Nitta L, Mochida S, Makino N, Nozawa Y, Tahara Y, Shibata S. Association of Night Snacking and Screen Time on Sleep Behavior in Japanese Toddlers: A Cross-Sectional Study. Children (Basel). 2024 Sep 4;11(9):1083. doi: 10.3390/children11091083.	2	1199
23.75	7	24.25	8.75	56.2	Spain	0	Pérez et al	2024	Pérez SE, LL Hernández, AS El-Hammouti, TG Cobiella, JCC Rodríguez, ...Evaluation of Sleep Patterns and Chronotypes in Spanish Women With Fibromyalgia Syndrome: A Descriptive Cross-Sectional Study.Journal of Sleep Medicine 2024, 21 (2), 88-97.	2	1200
24.05	7.06667	24.7167	8.78333	16.6	Singapore	2	Leong et al	2024	Leong RLF, Tian L, Yu N, Teo TB, Ong JL, Chee MWL. Bidirectional associations between the duration and timing of nocturnal sleep and daytime naps in adolescents differ from weekdays to weekends. Sleep. 2024 Sep 9;47(9):zsae147. doi: 10.1093/sleep/zsae147.	2	1201
21.4833	7.13333	21.8667	7.91667	5.2	China	0	Chen et al	2024	Chen JY, Che XY, Zhao XY, Liao YJ, Zhao PJ, Yan F, Fang J, Liu Y, Yu XD, Wang GH. Latent profiles of multi-dimensional sleep characteristics and association with overweight/obesity in Chinese preschool children. Sleep Med. 2024 Dec;124:346-353. doi: 10.1016/j.sleep.2024.09.033.	2	1202
23.2167	6.3	24.3167	8.01667	17.3	USA	0	Gillis et al	2024	Gillis BT, Shimizu M, Brigham EF, Hinnant B, El-Sheikh M. What Keeps Night Owls Well During the Week? Sleep Onset Consistency as a Moderator Between Morningness-Eveningness and Adolescent Development. Behav Sleep Med. 2024 Oct 6:1-13. doi: 10.1080/15402002.2024.2412331.	2	1203
25.35	8.16667	26.0667	10.4333	21.1	Hong Kong	0	Cheung et al	2024	Cheung FTW, Sit HF, Li X, Chan JWY, Chan NY, Wing YK, Li SX. A Longitudinal Examination between Chronotype and Insomnia in Youths: A Cross-Lagged Panel Analysis. Clocks Sleep. 2024 Oct 10;6(4):557-567. doi: 10.3390/clockssleep6040037.	2	1204
25.3833	8.66667	26.1333	10.65	22.1	Hong Kong	0	Cheung et al	2024	Cheung FTW, Sit HF, Li X, Chan JWY, Chan NY, Wing YK, Li SX. A Longitudinal Examination between Chronotype and Insomnia in Youths: A Cross-Lagged Panel Analysis. Clocks Sleep. 2024 Oct 10;6(4):557-567. doi: 10.3390/clockssleep6040037.	2	1205
22.93	6.54683	23.615	8.20683	14.8	USA	1	Harvey et al	2018	Harvey AG, Hein K, Dolsen EA, Dong L, Rabe-Hesketh S, Gumport NB, Kanady J, Wyatt JK, Hinshaw SP, Silk JS, Smith RL, Thompson MA, Zannone N, Blum DJ. Modifying the Impact of Eveningness Chronotype ("Night-Owls") in Youth: A Randomized Controlled Trial. J Am Acad Child Adolesc Psychiatry. 2018 Oct;57(10):742-754. doi: 10.1016/j.jaac.2018.04.020.	2	1206
22.5	6	23	8	41.1	France	1	Bouchou et al	2024	Bouchou Y, Giffard-Quillon L, Fontana L, Roche F, Pélissier C, Berger M. Sleep Habits and Disturbances in Healthcare Workers: A Cross-Sectional Survey in French Public Hospitals. Nat Sci Sleep. 2024 Oct 23;16:1687-1698. doi: 10.2147/NSS.S461993.	2	1207
23.0833	6.86667	23.8833	8.36667	33.6	USA	0	Veronda&Irish	2022	Veronda AC, Irish LA. Evaluation of the Chrononutrition Profile - Questionnaire in an online community sample of adults. Eat Behav. 2022 Apr;45:101633. doi: 10.1016/j.eatbeh.2022.101633.	2	1208
23.1833	6.79333	23.8667	8.25667	15.5	USA	2	Duraccio et al	2024	Duraccio KM, Lee L, Wright ID, Kamhout S, Boris N, Zhang V, Wilkins I. Looking beyond sleep duration in understanding obesity risk in adolescents: the role of circadian timing and misalignment on adolescent dietary outcomes, physical activity, and body mass index. Sleep Adv. 2024 Nov 1;5(1):zpae081. doi: 10.1093/sleepadvances/zpae081.	2	1209
23.139	7.804	24.522	9.381	14.6	Brasil	0	Martins et al	2024	Martins NNF, Mortatti AL, Schaan BD, Cureau FV. Prevalence of social jetlag and associated factors in Brazilian adolescents: Results from a country-wide cross-sectional study. Sleep Health. 2024 Nov 11:S2352-7218(24)00228-6. doi: 10.1016/j.sleh.2024.10.001.	2	1210
21.468	7.5665	21.7945	8.034	2	Italy	0	Breda et al	2023	Breda M, Belli A, Esposito D, Di Pilla A, Melegari MG, DelRosso L, Malorgio E, Doria M, Ferri R, Bruni O. Sleep habits and sleep disorders in Italian children and adolescents: a cross-sectional survey. J Clin Sleep Med. 2023 Apr 1;19(4):659-672. doi: 10.5664/jcsm.10400.	2	1211
21.374	7.4835	21.987	8.3365	4.5	Italy	0	Breda et al	2023	Breda M, Belli A, Esposito D, Di Pilla A, Melegari MG, DelRosso L, Malorgio E, Doria M, Ferri R, Bruni O. Sleep habits and sleep disorders in Italian children and adolescents: a cross-sectional survey. J Clin Sleep Med. 2023 Apr 1;19(4):659-672. doi: 10.5664/jcsm.10400.	2	1212
21.367	7.223	22.2805	8.6605	9.5	Italy	0	Breda et al	2023	Breda M, Belli A, Esposito D, Di Pilla A, Melegari MG, DelRosso L, Malorgio E, Doria M, Ferri R, Bruni O. Sleep habits and sleep disorders in Italian children and adolescents: a cross-sectional survey. J Clin Sleep Med. 2023 Apr 1;19(4):659-672. doi: 10.5664/jcsm.10400.	2	1213
22.1575	7.0045	23.1935	9.2665	16	Italy	0	Breda et al	2023	Breda M, Belli A, Esposito D, Di Pilla A, Melegari MG, DelRosso L, Malorgio E, Doria M, Ferri R, Bruni O. Sleep habits and sleep disorders in Italian children and adolescents: a cross-sectional survey. J Clin Sleep Med. 2023 Apr 1;19(4):659-672. doi: 10.5664/jcsm.10400.	2	1214
23.15	6.08333	24.15	8.63333	15.5	Brasil	1	Diogo et al	2021	Diogo FMC, Galina SD, de Oliveira MLC, Valdez P, de Azevedo CVM. Comparative analysis of sleep patterns and attention components in high school and college adolescents. Sleep Sci. 2021 Jan-Mar;14(Spec 1):49-55. doi: 10.5935/1984-0063.20200085.	2	1215
23.0667	6.36667	24.0833	8.26667	18.8	Brasil	1	Diogo et al	2021	Diogo FMC, Galina SD, de Oliveira MLC, Valdez P, de Azevedo CVM. Comparative analysis of sleep patterns and attention components in high school and college adolescents. Sleep Sci. 2021 Jan-Mar;14(Spec 1):49-55. doi: 10.5935/1984-0063.20200085.	2	1216
25.8	8.93333	26.55	10.1833	17.5	USA	2	Creswell et al	2023	Creswell JD, Tumminia MJ, Price S, Sefidgar Y, Cohen S, Ren Y, Brown J, Dey AK, Dutcher JM, Villalba D, Mankoff J, Xu X, Creswell K, Doryab A, Mattingly S, Striegel A, Hachen D, Martinez G, Lovett MC. Nightly sleep duration predicts grade point average in the first year of college. Proc Natl Acad Sci U S A. 2023 Feb 21;120(8):e2209123120. doi: 10.1073/pnas.2209123120.	2	1217
20.35	6.96667	22.1833	9.28333	7.9	Iran	0	Mokhtarpour et al	2024	Mokhtarpour K, Mohtashami T, Garmabi B. Reliability and validity of the Persian version of the Children's Chronotype Questionnaire in school and preschool-aged children (CCTQIR). Chronobiol Int. 2024 Dec;41(12):1626-1635. doi: 10.1080/07420528.2024.2432436.	2	1218
22.05	6.58333	22.4167	8.65	7	Brasil	2	Llaguno et al	2024	Llaguno NS et al. The sleep of school children. Rev Soc Bras Enferm Ped. 2023, 23, eSOBEP20230041	2	1219
23.2167	8.25	23.9	9.45	8	Brasil	2	Llaguno et al	2024	Llaguno NS et al. The sleep of school children. Rev Soc Bras Enferm Ped. 2023, 23, eSOBEP20230041	2	1220
21.0791	6.76246	21.2653	7.25437	5	Japan	0	Lo et al	2024	Lo YP, Tahara Y, Khaing IK, Mochida S, Makino N, Nozawa Y, Furutani A, Kubo T, Shibata S. Association of family meals with sleep and quality of life in Japanese preschool and elementary school children: A cross-sectional study. Chronobiol Int. 2024 Nov;41(11):1430-1441. doi: 10.1080/07420528.2024.2422868.	2	1221
21.2441	6.47765	21.5745	7.23827	6	Japan	0	Lo et al	2024	Lo YP, Tahara Y, Khaing IK, Mochida S, Makino N, Nozawa Y, Furutani A, Kubo T, Shibata S. Association of family meals with sleep and quality of life in Japanese preschool and elementary school children: A cross-sectional study. Chronobiol Int. 2024 Nov;41(11):1430-1441. doi: 10.1080/07420528.2024.2422868.	2	1222
23.9333	8.36667	24.35	9.98333	15.4	Czech Republic	2	Příhodová et al	2021	Příhodová I, Dostálová S, Bielicki P, Skibová J, Nevšímalová S, Šonka K. Delayed Sleep-Wake Phase Disorder: Can Polysomnography Be Useful? Pediatr Neurol. 2022 Feb;127:28-31. doi: 10.1016/j.pediatrneurol.2021.11.010.	2	1223
22.8833	6.93333	23.9833	8.46667	39.9	Netherlands	0	Landvreugd et al	2024	Landvreugd, A., Nivard, M. G., & Bartels, M. (2024, October 29). Detaching from the Nine-to-Five: How Retirement has an effect on the Genetic Influences on Chronotype. Retrieved from osf.io/zp64w	2	1224
23.9333	6.83333	24.7333	8.25	21.5	Brasil	0	Vasconcelos et al	2024	Vasconcelos D, de Santos S, Viana KVS, Diniz DCL, Silva IT, Borges ICO, M. C. S. T., de Ferreira LG (2024) F. Sleep patterns and quality in university students: Characteristics and associated factors. Manual Therapy, Posturology & Rehabilitation Journal, 22(1364).	2	1225
24.43	8.33	26.11	10.61	51	Canada	0	Reid et al	2020	Reid RER, McNeil J, Roumeliotis G, Reid TGR, Carver TE, Andersen RE. Sleep Duration and Timing in the Medium- to Long-Term Post-Bariatric Surgery. Obes Surg. 2020 Jun;30(6):2454-2459. doi: 10.1007/s11695-020-04416-4.	2	1226
21.44	6.92	22.26	8.37	11.9	Australia	0	Tremaine et al	2010	Tremaine RB, Dorrian J, Blunden S. Measuring sleep habits using the sleep timing questionnaire: a validation study for school-age children. Sleep Biol Rhyth. 2010; 8(3): 194–202.	2	1227
21.91	6.83	22.74	7.87	11.9	Australia	1	Tremaine et al	2010	Tremaine RB, Dorrian J, Blunden S. Measuring sleep habits using the sleep timing questionnaire: a validation study for school-age children. Sleep Biol Rhyth. 2010; 8(3): 194–202.	2	1228
21.79	6.47	22.74	7.49	11.9	Australia	2	Tremaine et al	2010	Tremaine RB, Dorrian J, Blunden S. Measuring sleep habits using the sleep timing questionnaire: a validation study for school-age children. Sleep Biol Rhyth. 2010; 8(3): 194–202.	2	1229
24.2	4.7	25.04	6.6	34	Iran	0	Niroumand Sarvandani et al	2023	Niroumand Sarvandani M, Asadi M, Mohtashami T, Mirrezaie SM, Talebi S, Garmabi B. Validity of the Persian version of the Munich ChronoType Questionnaire (MCTQIR). Sleep Breath. 2023 Oct;27(5):2005-2012. doi: 10.1007/s11325-023-02792-6.	2	1230
25.1333	7.4	25.3167	9.61667	21.2	Korea	0	Choi et al	2019	Choi, H.J., Lee, Y.J., Yoo, Y.J. et al. The effects of chronotype and social jetlag on medical students. Sleep Biol. Rhythms 17, 269–276 (2019). https://doi.org/10.1007/s41105-018-00198-6	2	1231
25.1167	7.06667	25.4	9.76667	22.6	Korea	0	Choi et al	2019	Choi, H.J., Lee, Y.J., Yoo, Y.J. et al. The effects of chronotype and social jetlag on medical students. Sleep Biol. Rhythms 17, 269–276 (2019). https://doi.org/10.1007/s41105-018-00198-6	2	1232
23.8833	7.5	24.6333	9.8	27.1	Korea	0	Suh et al	2024	Suh S, Kim SH, Ryu H, Choi SJ, Joo EY. Validation of the Korean Munich Chronotype Questionnaire. Sleep Breath. 2018 Sep;22(3):773-779. doi: 10.1007/s11325-017-1609-z.	2	1233
20.25	7.05	21.05	7.9	8.7	Netherlands	0	van der Heijden et al	2024	van der Heijden KB, Stoffelsen RJ, Popma A, Swaab H. Sleep, chronotype, and sleep hygiene in children with attention-deficit/hyperactivity disorder, autism spectrum disorder, and controls. Eur Child Adolesc Psychiatry. 2018 Jan;27(1):99-111. doi: 10.1007/s00787-017-1025-8.	2	1234
23	8	23	9	17	Egypt	0	Abou‑Khadra et al	2021	Abou-Khadra, M.K., Kishk, N.A., Ahmed, D. et al. Sleep Patterns, Problems, and Habits Among Egyptian Adolescents with Epilepsy. Sleep Vigilance 5, 309–314 (2021). https://doi.org/10.1007/s41782-021-00165-1	2	1235
20.5667	6.03333	21.5667	7.86667	15.5	China	0	Mei et al	2019	Mei, X., Hu, Z., Zhou, D. et al. Sleep patterns, mobile phone use and psychological symptoms among adolescents in coastal developed city of China: an exploratory cross-sectional study. Sleep Biol. Rhythms 17, 233–241 (2019). https://doi.org/10.1007/s41105-019-00208-1	2	1236
22.45	5.46667	23.6333	8.45	15.3	India	0	Guru et al	2024	Guru, C.S., Datta, K., Krishnan, A. et al. Sleep Pattern and Sports Performance of Adolescent Archers: A Pre–Post-intervention Pilot Study. Sleep Vigilance 3, 143–149 (2019). https://doi.org/10.1007/s41782-019-00073-5	2	1237
24.33	7.22	25.08	9.46	18.5	Japan	1	Asaoka et al	2004	Asaoka, S., Fukuda, K. & Yamazaki, K. Effects of sleep-wake pattern and residential status on psychological distress in university students. Sleep Biol. Rhythms 2, 192–198 (2004). https://doi.org/10.1111/j.1479-8425.2004.00138.x	2	1238
24.23	7.74	24.75	9.25	18.9	Japan	1	Asaoka et al	2004	Asaoka, S., Fukuda, K. & Yamazaki, K. Effects of sleep-wake pattern and residential status on psychological distress in university students. Sleep Biol. Rhythms 2, 192–198 (2004). https://doi.org/10.1111/j.1479-8425.2004.00138.x	2	1239
24.86	7.84	24.84	9.41	19.7	Japan	1	Asaoka et al	2004	Asaoka, S., Fukuda, K. & Yamazaki, K. Effects of sleep-wake pattern and residential status on psychological distress in university students. Sleep Biol. Rhythms 2, 192–198 (2004). https://doi.org/10.1111/j.1479-8425.2004.00138.x	2	1240
24.9	8.3	25.2	9.5	21.3	Japan	0	Furihata et al	2024	Furihata, R., Shimamoto, T., Makino, Y. et al. Efficacy of sleep extension therapy using a remote support system in university students with increased social jetlag: a parallel, single-blind, randomized controlled trial. Sleep Biol. Rhythms 21, 359–368 (2023). https://doi.org/10.1007/s41105-023-00453-5	2	1241
23.1667	7.13333	24.1667	8.71667	28.2	USA	0	Hayes et al	2024	Hayes JF, Schumacher LM, Lanoye A, LaRose JG, Tate DF, Espeland MA, Gorin AA, Lewis CE, Jelalian E, Wing RR; Study of Novel Approaches to Weight Gain Prevention (SNAP) Research Group. Persistent, High Levels of Social Jetlag Predict Poor Weight Outcomes in a Weight Gain Prevention Study for Young adults. J Behav Med. 2022 Oct;45(5):794-803. doi: 10.1007/s10865-022-00339-w.	2	1242
21.2833	6.93333	21.1833	7.45	40	Japan	0	Yamamoto&Hara	2024	Yamamoto R, Hara S. The relationships between bedtime routines and preschooler's sleep health and well-being: a cross-sectional survey in Japan. Sleep Biol Rhythms. 2024 May 20;22(4):471-479. doi: 10.1007/s41105-024-00530-3.	2	1243
23.808	7.43518	25.0427	9.70029	38.8	Russia	0	Gavrilov et al	2020	Gavrilov, Y.V., Shkilnyuk, G.G., Konkina, E.A. et al. Frequency and Correlates of Sleep Debt in St. Petersburg. Sleep Vigilance 4, 227–236 (2020). https://doi.org/10.1007/s41782-020-00091-8	2	1244
24.58	7.29468	25.1568	8.47818	22	India	0	Singh et al	2021	Singh, N., Jha, N.A., Rani, S. et al. The Association of Internet Overuse with Sleep and Mood in Indian Female University Students. Sleep Vigilance 5, 71–83 (2021). https://doi.org/10.1007/s41782-021-00129-5	2	1245
21.8905	6.29877	22.6348	8.18235	11.1	Japan	0	Yoshimatsu et al	2004	Yoshimatsu, S., Hayashi, M. Bedtime and lifestyle in primary school children. Sleep Biol. Rhythms 2, 153–155 (2004). https://doi.org/10.1111/j.1479-8425.2004.00131.x	2	1246
21.205	6.405	21.315	6.92	7	Japan	0	Fukuda et al	2024	Fukuda, K., Asaoka, S. Delayed bedtime of nursery school children, caused by the obligatory nap, lasts during the elementary school period. Sleep Biol. Rhythms 2, 129–134 (2004). https://doi.org/10.1111/j.1479-8425.2004.00129.x	2	1247
20.97	6.455	21.135	7.105	9	Japan	0	Fukuda et al	2024	Fukuda, K., Asaoka, S. Delayed bedtime of nursery school children, caused by the obligatory nap, lasts during the elementary school period. Sleep Biol. Rhythms 2, 129–134 (2004). https://doi.org/10.1111/j.1479-8425.2004.00129.x	2	1248
20.615	6.415	21.09	7.41	11	Japan	0	Fukuda et al	2024	Fukuda, K., Asaoka, S. Delayed bedtime of nursery school children, caused by the obligatory nap, lasts during the elementary school period. Sleep Biol. Rhythms 2, 129–134 (2004). https://doi.org/10.1111/j.1479-8425.2004.00129.x	2	1249
22.6	7.31667	23.95	10	12	Spain	0	Collado et al	2012	Collado Mateo MJ, Díaz-Morales JF, Escribano Barreno C, Delgado Prieto P, Randler C. Morningness-eveningness and sleep habits among adolescents: age and gender differences. Psicothema. 2012;24(3):410-5.	1	1250
25.55	6.86	25.925	8.35	8.1	Japan	2	Kubo et al	2011	Kubo T, Takahashi M, Sato T, Sasaki T, Oka T, Iwasaki K. Weekend sleep intervention for workers with habitually short sleep periods. Scand J Work Environ Health. 2011 Sep;37(5):418-26. doi: 10.5271/sjweh.3162.	2	1251
22	6.5	23.5	10	13	Switzerland	0	Tinguely&Cajochen	2011	Tinguely G. and Cajochen C. Sleep times, sleep quality and subjectively perceived disturbing noise sources in a representative sample of the Swiss population. International Congress on Noise as a Public Health Problem (ICBEN), Institute of Acoustics Proceedings 2011,33, 640-649. DOI 10.25144/16861	2	1252
23	6.5	25.1	10	17.5	Switzerland	0	Tinguely&Cajochen	2011	Tinguely G. and Cajochen C. Sleep times, sleep quality and subjectively perceived disturbing noise sources in a representative sample of the Swiss population. International Congress on Noise as a Public Health Problem (ICBEN), Institute of Acoustics Proceedings 2011,33, 640-649. DOI 10.25144/16861	2	1253
23	6.5	24.4	8.9	25	Switzerland	0	Tinguely&Cajochen	2011	Tinguely G. and Cajochen C. Sleep times, sleep quality and subjectively perceived disturbing noise sources in a representative sample of the Swiss population. International Congress on Noise as a Public Health Problem (ICBEN), Institute of Acoustics Proceedings 2011,33, 640-649. DOI 10.25144/16861	2	1254
23	6.4	24.2	8.9	35	Switzerland	0	Tinguely&Cajochen	2011	Tinguely G. and Cajochen C. Sleep times, sleep quality and subjectively perceived disturbing noise sources in a representative sample of the Swiss population. International Congress on Noise as a Public Health Problem (ICBEN), Institute of Acoustics Proceedings 2011,33, 640-649. DOI 10.25144/16861	2	1255
23	6	23.8	7.8	45	Switzerland	0	Tinguely&Cajochen	2011	Tinguely G. and Cajochen C. Sleep times, sleep quality and subjectively perceived disturbing noise sources in a representative sample of the Swiss population. International Congress on Noise as a Public Health Problem (ICBEN), Institute of Acoustics Proceedings 2011,33, 640-649. DOI 10.25144/16861	2	1256
23	6	23.4	7.8	55	Switzerland	0	Tinguely&Cajochen	2011	Tinguely G. and Cajochen C. Sleep times, sleep quality and subjectively perceived disturbing noise sources in a representative sample of the Swiss population. International Congress on Noise as a Public Health Problem (ICBEN), Institute of Acoustics Proceedings 2011,33, 640-649. DOI 10.25144/16861	2	1257
23	6.5	23.3	7.8	65	Switzerland	0	Tinguely&Cajochen	2011	Tinguely G. and Cajochen C. Sleep times, sleep quality and subjectively perceived disturbing noise sources in a representative sample of the Swiss population. International Congress on Noise as a Public Health Problem (ICBEN), Institute of Acoustics Proceedings 2011,33, 640-649. DOI 10.25144/16861	2	1258
23	7	23.2	7.1	80	Switzerland	0	Tinguely&Cajochen	2011	Tinguely G. and Cajochen C. Sleep times, sleep quality and subjectively perceived disturbing noise sources in a representative sample of the Swiss population. International Congress on Noise as a Public Health Problem (ICBEN), Institute of Acoustics Proceedings 2011,33, 640-649. DOI 10.25144/16861	2	1259
23.77	6.44	24.9	10.85	15.8	Brasil	2	Fischer et al	2015	Fischer FM, Wey D, Valente D, Luz AA, Pinheiro F, Fonseca BC, Silva-Costa A, Moreno CR, Menna-Barreto L, Teixeira LR. Sleep patterns and sleepiness among young students: A longitudinal study before and after admission as trainees and apprentices. Chronobiol Int. 2015 May;32(4):478-85. doi: 10.3109/07420528.2014.993765.	2	1260
22.7	6.9	23.2	10	10.5	USA	2	Su et al	2022	Su S, Li X, Xu Y, McCall WV, Wang X. Epidemiology of accelerometer-based sleep parameters in US school-aged children and adults: NHANES 2011-2014. Sci Rep. 2022 May 10;12(1):7680. doi: 10.1038/s41598-022-11848-8.	2	1261
23	6.9	23.9	10	15.5	USA	2	Su et al	2022	Su S, Li X, Xu Y, McCall WV, Wang X. Epidemiology of accelerometer-based sleep parameters in US school-aged children and adults: NHANES 2011-2014. Sci Rep. 2022 May 10;12(1):7680. doi: 10.1038/s41598-022-11848-8.	2	1262
23.5	8.2	24.4	8.9	22	USA	2	Su et al	2022	Su S, Li X, Xu Y, McCall WV, Wang X. Epidemiology of accelerometer-based sleep parameters in US school-aged children and adults: NHANES 2011-2014. Sci Rep. 2022 May 10;12(1):7680. doi: 10.1038/s41598-022-11848-8.	2	1263
23.3	6.7	23.8	8.9	31	USA	2	Su et al	2022	Su S, Li X, Xu Y, McCall WV, Wang X. Epidemiology of accelerometer-based sleep parameters in US school-aged children and adults: NHANES 2011-2014. Sci Rep. 2022 May 10;12(1):7680. doi: 10.1038/s41598-022-11848-8.	2	1264
23	6.5	23.2	7.8	51	USA	2	Su et al	2022	Su S, Li X, Xu Y, McCall WV, Wang X. Epidemiology of accelerometer-based sleep parameters in US school-aged children and adults: NHANES 2011-2014. Sci Rep. 2022 May 10;12(1):7680. doi: 10.1038/s41598-022-11848-8.	2	1265
22.8	6.6	23.1	7.8	61	USA	2	Su et al	2022	Su S, Li X, Xu Y, McCall WV, Wang X. Epidemiology of accelerometer-based sleep parameters in US school-aged children and adults: NHANES 2011-2014. Sci Rep. 2022 May 10;12(1):7680. doi: 10.1038/s41598-022-11848-8.	2	1266
22.7	7	22.9	7.8	71	USA	2	Su et al	2022	Su S, Li X, Xu Y, McCall WV, Wang X. Epidemiology of accelerometer-based sleep parameters in US school-aged children and adults: NHANES 2011-2014. Sci Rep. 2022 May 10;12(1):7680. doi: 10.1038/s41598-022-11848-8.	2	1267
22.6	7	23.8	7.1	81	USA	2	Su et al	2022	Su S, Li X, Xu Y, McCall WV, Wang X. Epidemiology of accelerometer-based sleep parameters in US school-aged children and adults: NHANES 2011-2014. Sci Rep. 2022 May 10;12(1):7680. doi: 10.1038/s41598-022-11848-8.	2	1268
22.58	7.7	23.47	8.28	39.9	Netherlands	0	Landvreugd et al	2024	Landvreugd A, Nivard M, Bartels M. Between the Biological and Social clock: Exploring the Association between Social Jetlag and Wellbeing.2024. https://osf.io/preprints/psyarxiv/tczsm	2	1269
23.61	7.08	23.59	7.32	24.4	India	0	Jaiswal et al	2024	Jaiswal S, Nishi Soni, Arjita Yadav, Sudhir Kumar, Shalie Malik, et al.. Variation in Sleep Traits in the Indian Population During Social Restriction. Asian Journal of Medicine and Health, 2024, 22 (6), pp.116-126. 10.9734/AJMAH/2024/v22i61027 . hal-04560008	2	1270
24.3	6.88333	24.6	8.4	37.7	Japan	0	Kondo et al	2024	Kondo K, Komada Y, Kitamura S, Tkachev V, Roenneberg T, Korman M. Sleep patterns in Metropolitan and Regional areas in Japan: Before and during COVID-19 social restrictions. Chronobiol Int. 2024 Jun;41(6):767-779. doi: 10.1080/07420528.2024.2340719.	2	1271
24.15	6.71667	24.5833	8.23333	38.5	Japan	0	Kondo et al	2024	Kondo K, Komada Y, Kitamura S, Tkachev V, Roenneberg T, Korman M. Sleep patterns in Metropolitan and Regional areas in Japan: Before and during COVID-19 social restrictions. Chronobiol Int. 2024 Jun;41(6):767-779. doi: 10.1080/07420528.2024.2340719.	2	1272
24.4	7.8	24.8	9.2	25	Korea	0	Park et al	2024	Park HR, Lee SY, Moon HJ, Kim JH, Cho JW, Cho YW, Yun CH, Han SH, Chu MK. Longitudinal changes in sleep and sleep-related symptoms among Korean adults between 2010 to 2022, including the COVID-19 pandemic period. PLoS One. 2024 Nov 7;19(11):e0311600. doi: 10.1371/journal.pone.0311600.	2	1273
24	7.2	24.2	8.3	35	Korea	0	Park et al	2024	Park HR, Lee SY, Moon HJ, Kim JH, Cho JW, Cho YW, Yun CH, Han SH, Chu MK. Longitudinal changes in sleep and sleep-related symptoms among Korean adults between 2010 to 2022, including the COVID-19 pandemic period. PLoS One. 2024 Nov 7;19(11):e0311600. doi: 10.1371/journal.pone.0311600.	2	1274
23.75	6.8	23.9	7.8	45	Korea	0	Park et al	2024	Park HR, Lee SY, Moon HJ, Kim JH, Cho JW, Cho YW, Yun CH, Han SH, Chu MK. Longitudinal changes in sleep and sleep-related symptoms among Korean adults between 2010 to 2022, including the COVID-19 pandemic period. PLoS One. 2024 Nov 7;19(11):e0311600. doi: 10.1371/journal.pone.0311600.	2	1275
23.5	6.5	23.6	7	55	Korea	0	Park et al	2024	Park HR, Lee SY, Moon HJ, Kim JH, Cho JW, Cho YW, Yun CH, Han SH, Chu MK. Longitudinal changes in sleep and sleep-related symptoms among Korean adults between 2010 to 2022, including the COVID-19 pandemic period. PLoS One. 2024 Nov 7;19(11):e0311600. doi: 10.1371/journal.pone.0311600.	2	1276
22.8	5.9	22.8	6.2	65	Korea	0	Park et al	2024	Park HR, Lee SY, Moon HJ, Kim JH, Cho JW, Cho YW, Yun CH, Han SH, Chu MK. Longitudinal changes in sleep and sleep-related symptoms among Korean adults between 2010 to 2022, including the COVID-19 pandemic period. PLoS One. 2024 Nov 7;19(11):e0311600. doi: 10.1371/journal.pone.0311600.	2	1277
22.017	7.64321	23.0887	9.68396	13.6	Spain	0	Moraleda‑Cibrián et al	2022	Moraleda-Cibrián M, Albares-Tendero J, Pin-Arboledas G. Screen media use and sleep patterns in Spanish adolescents during the lockdown of the coronavirus pandemic. Sleep Breath. 2022 Dec;26(4):1993-2000. doi: 10.1007/s11325-021-02558-y.	2	1278
22.3167	5.38333	22.6333	7.25	14.2	India	0	Pradhan&Sinha	2017	Pradhan, R.K., Sinha, N. Impact of commuting distance and school timing on sleep of school students. Sleep Biol. Rhythms 15, 153–158 (2017). https://doi.org/10.1007/s41105-017-0091-0	2	1279
24.1833	6.46667	26.15	11.5167	17.6	Argentina	0	Ferrante et al	2024	Ferrante GR, AP Goldin, MJ Leone. Adolescents’ sleep quality is associated with day of the week, school timing and chronotype.Sleep Epidemiology 2024, 4, 100092	2	1280
22.6167	6.53333	23.1833	7.71667	38.8	Australia	0	Phoi et al	2024	Phoi YY, Dorrian J, Rogers M, Bonham MP, Coates AM. Chronotype, temporal patterns of eating and diet composition on work and work-free days. Chronobiol Int. 2024 Dec;41(12):1556-1565. doi: 10.1080/07420528.2024.2429664.	2	1281
22.2833	8.11667	22.65	9.43333	10	Portugal	0	Cardoso et al	2024	Cardoso S, Correia D, Vilela S. Associations between chronotype, diet quality and timing of energy intake in Portuguese children and adolescents: The potential role of summer holidays. Chronobiol Int. 2024 May;41(5):647-657. doi: 10.1080/07420528.2024.2339970.	2	1282
21.8889	7.49444	22.5167	10.5167	4.5	Singapore	0	Eng et al	2024	Eng DZH, Tham EKH, Jafar NK, Tan JSY, Goh DYT, Lee YS, Shek LP, Teoh OH, Yap F, Tan KH, Eriksson JG, Chong YS, Meaney MJ, Cai S, Broekman BFP. Sleep problems in preschool mediate the association between chronotype and socioemotional problems at school-age. Sleep Med. 2024 Dec;124:174-186. doi: 10.1016/j.sleep.2024.09.003.	2	1283
22.6278	7.72778	23.05	9.88889	4.5	Singapore	2	Eng et al	2024	Eng DZH, Tham EKH, Jafar NK, Tan JSY, Goh DYT, Lee YS, Shek LP, Teoh OH, Yap F, Tan KH, Eriksson JG, Chong YS, Meaney MJ, Cai S, Broekman BFP. Sleep problems in preschool mediate the association between chronotype and socioemotional problems at school-age. Sleep Med. 2024 Dec;124:174-186. doi: 10.1016/j.sleep.2024.09.003.	2	1284
23.7778	6.93333	24.3556	8.08889	27.2	India	0	Sinha et al	2024	Sinha M, Babita Pande, Arunita Jagzape & Ramanjan Sinha. A validated Hindi version of ‘reduced Morningness-Eveningness Questionnaire’ of rMEQ) for chronotype assessment, Biological Rhythm Research, 55:9-10, 441-456, DOI: 10.1080/09291016.2024.2377488	2	1285
23.6	7.4	23.8	8	56.2	Ukraine	0	Romanenko et al	2024	Romanenko M, Schuster J, Piven L, Synieok L, Dubiley T, Bogomaz L, Hahn A, Müller M. Association of diet, lifestyle, and chronotype with metabolic health in Ukrainian adults: a cross-sectional study. Sci Rep. 2024 Mar 1;14(1):5143. doi: 10.1038/s41598-024-55715-0.	2	1286
22.15	7.11667	22.5333	8.15	4.9	Russia	0	Borisenkov et al	2025	Borisenkov M, Arbuzova M, Khusametdinova V, Ryabinina E. The association between melatonin-containing food consumption and sleep/meal timing and behavior in children with language difficulties. Chronobiol Int. 2025 Jan;42(1):70-84. doi: 10.1080/07420528.2024.2444678.	2	1287
22.8833	6.93333	23.9833	8.46667	39.9	Netherlands	0	Landvreugd et al	2025	Landvreugd A, Gordijn M, Nivard M, Bartels M. Detaching From the Nine-to-Five: How Retirement and Genetics Are Related to Chronotype. J Sleep Res. 2025 Feb 25:e70026. doi: 10.1111/jsr.70026.	2	1288
20.95	6.53333	20.95	6.81667	0.5	Japan	0	Miike	2024	Miike T. Insufficient Sleep Syndrome in Childhood. Children (Basel). 2024 Dec 26;12(1):19. doi: 10.3390/children12010019.	2	1289
21.1833	6.61667	21.2333	6.95	1.5	Japan	0	Miike	2024	Miike T. Insufficient Sleep Syndrome in Childhood. Children (Basel). 2024 Dec 26;12(1):19. doi: 10.3390/children12010019.	2	1290
21.5333	6.81667	21.5333	7.2	2.5	Japan	0	Miike	2024	Miike T. Insufficient Sleep Syndrome in Childhood. Children (Basel). 2024 Dec 26;12(1):19. doi: 10.3390/children12010019.	2	1291
21.6667	6.91667	21.5833	7.3	3.5	Japan	0	Miike	2024	Miike T. Insufficient Sleep Syndrome in Childhood. Children (Basel). 2024 Dec 26;12(1):19. doi: 10.3390/children12010019.	2	1292
21.5833	6.9	21.5833	7.26667	4.5	Japan	0	Miike	2024	Miike T. Insufficient Sleep Syndrome in Childhood. Children (Basel). 2024 Dec 26;12(1):19. doi: 10.3390/children12010019.	2	1293
21.6333	6.86667	21.6833	7.31667	5.5	Japan	0	Miike	2024	Miike T. Insufficient Sleep Syndrome in Childhood. Children (Basel). 2024 Dec 26;12(1):19. doi: 10.3390/children12010019.	2	1294
21.6333	6.83333	21.6667	7.28333	6.5	Japan	0	Miike	2024	Miike T. Insufficient Sleep Syndrome in Childhood. Children (Basel). 2024 Dec 26;12(1):19. doi: 10.3390/children12010019.	2	1295
23.7	7.8	24.4	9.6	17.2	Portugal	0	Barreira et al	2025	Barreira J, Brito J, Nakamura FY, Figueiredo P. No match, more sleep: Greater weekend catch-up sleep in youth soccer players on free weekends. Sleep Med. 2025 Mar;127:36-42. doi: 10.1016/j.sleep.2025.01.002.	2	1296
23.9833	6.96667	25.5167	10.25	23	Uruguay	0	Marchesano et al	2025	Marchesano M, Carboni A, Tassino B, Silva A. Circadian Rhythms, Regular Exercise, and Cognitive Performance in Morning-Trained Dancers. Clocks Sleep. 2025 Feb 18;7(1):7. doi: 10.3390/clockssleep7010007.	2	1297
24.5833	8.01667	25.8333	9.26667	23	Uruguay	2	Marchesano et al	2025	Marchesano M, Carboni A, Tassino B, Silva A. Circadian Rhythms, Regular Exercise, and Cognitive Performance in Morning-Trained Dancers. Clocks Sleep. 2025 Feb 18;7(1):7. doi: 10.3390/clockssleep7010007.	2	1298
22.36	5.75	22.56	6.23	15.8	Nigeria	2	Olorunmoteni et al	2025	Olorunmoteni OE, Fatusi AO, Gómez-Olivé FX, Scheuermaier K. Objectively-measured sleep characteristics and the associated factors among rural and urban in-school Nigerian adolescents. Sleep Med. 2025 Mar;127:158-165. doi: 10.1016/j.sleep.2025.01.020.	2	1299
22.67	5.38	22.92	5.93	15.3	Nigeria	2	Olorunmoteni et al	2025	Olorunmoteni OE, Fatusi AO, Gómez-Olivé FX, Scheuermaier K. Objectively-measured sleep characteristics and the associated factors among rural and urban in-school Nigerian adolescents. Sleep Med. 2025 Mar;127:158-165. doi: 10.1016/j.sleep.2025.01.020.	2	1300
23.1167	5.75	24	8.95	21	UK	2	Wilson et al	2025	Wilson SMB, Jones MI, Draper SB, Parker JK. Irregular sleep/wake patterns in student-athletes exposed to early morning training. J Sports Sci. 2025 Feb;43(3):256-265. doi: 10.1080/02640414.2025.2452726.	2	1301
22.5167	6.86667	24.4833	10.9333	16.3	Norway	0	Arnesen et al	2025	Arnesen IB, Bjorvatn B, Pallesen S, Waage S, Gradisar M, Wilhelmsen-Langeland A, Saxvig IW. Insomnia in adolescent epidemiological studies: To what extent can the symptoms be explained by circadian factors? Chronobiol Int. 2025 Jan;42(1):58-69. doi: 10.1080/07420528.2024.2444677.	2	1302
23.5242	6.12233	23.9343	8.56617	39.8	Switzerland	2	De Pieri et al	2025	De Pieri M, Castelnovo A, Miano S, Manconi M. The diagnostic and therapeutic value of time in bed extension in Insufficient Sleep Syndrome. Sleep Med. 2025 Apr;128:219-228. doi: 10.1016/j.sleep.2025.02.013.	2	1303
20.25	7.1	21.05	7.55	8.6	New Zealand	1	Elder et al	2020	Elder D, McDowall P, Sim D, Campbell A. Sleep in New Zealand children aged 7-9: associations with ethnicity, socioeconomic status, and achievement in reading and mathematics. J Clin Sleep Med. 2020 Jun 15;16(6):847-854. doi: 10.5664/jcsm.8342.	2	1304
20.7833	6.83333	21.6333	7.13333	8.6	New Zealand	2	Elder et al	2020	Elder D, McDowall P, Sim D, Campbell A. Sleep in New Zealand children aged 7-9: associations with ethnicity, socioeconomic status, and achievement in reading and mathematics. J Clin Sleep Med. 2020 Jun 15;16(6):847-854. doi: 10.5664/jcsm.8342.	2	1305
20.7667	7.06667	21.1833	7.8	4.8	Finland	0	Abdollahi et al	2025	Abdollahi AM, Li X, Merikanto I, Leppänen MH, Vepsäläinen H, Lehto R, Ray C, Erkkola M, Roos E. Comparison of actigraphy-measured and parent-reported sleep in association with weight status among preschool children. J Sleep Res. 2024 Feb;33(1):e13960. doi: 10.1111/jsr.13960.	2	1306
21.15	6.83333	21.4667	7.35	4.8	Finland	2	Abdollahi et al	2025	Abdollahi AM, Li X, Merikanto I, Leppänen MH, Vepsäläinen H, Lehto R, Ray C, Erkkola M, Roos E. Comparison of actigraphy-measured and parent-reported sleep in association with weight status among preschool children. J Sleep Res. 2024 Feb;33(1):e13960. doi: 10.1111/jsr.13960.	2	1307
24.2167	6.99333	24.5417	7.43333	23.9	Australia	2	Rouhi et al	2025	Rouhi S, Egorova-Brumley N, Jordan AS. Painful Mondays: Exploring Weekly Sleep Variations and Pain Perception in Healthy Women-An Experimental Study. Eur J Pain. 2025 Apr;29(4):e70004. doi: 10.1002/ejp.70004.	2	1308
24.6323	7.0787	25.2149	10.1753	19.5	Russia	0	Putilov et al	2023	Putilov AA, Sveshnikov DS, Bakaeva ZV, Yakunina EB, Starshinov YP, Torshin VI, Trutneva EA, Lapkin MM, Lopatskaya ZN, Gandina EO, Ligun NV, Puchkova AN, Dorokhov VB. Evening chronotype, insufficient weekday sleep, and weekday-weekend gap in sleep times: What is really to blame for a reduction in self-perceived health among university students? Chronobiol Int. 2023 Jul 3;40(7):874-884. doi: 10.108…	2	1309
23.7	6.9	25.1	9	17.3	USA	2	Hasler et al	2025	Hasler BP, Oryshkewych N, Wallace ML, Clark DB, Siegle GJ, Buysse DL. Circadian phase in high school students: Weekday-weekend shifts and relationships to other sleep/circadian characteristics. Sleep. 2025 Feb 4:zsaf031. doi: 10.1093/sleep/zsaf031.	2	1310
23.5	6.9	24.7	8.8	20	Australia	0	Rigney et al	2025	Rigney G, Browne M, Sargent C, Lastella M. Sleep Timing Across the Lifespan of Australian Adults. Clocks Sleep. 2025 Mar 20;7(1):16. doi: 10.3390/clockssleep7010016.	2	1311
23.3	6.7	24.2	8.6	25	Australia	0	Rigney et al	2025	Rigney G, Browne M, Sargent C, Lastella M. Sleep Timing Across the Lifespan of Australian Adults. Clocks Sleep. 2025 Mar 20;7(1):16. doi: 10.3390/clockssleep7010016.	2	1312
23	6.3	23.6	7.8	30	Australia	0	Rigney et al	2025	Rigney G, Browne M, Sargent C, Lastella M. Sleep Timing Across the Lifespan of Australian Adults. Clocks Sleep. 2025 Mar 20;7(1):16. doi: 10.3390/clockssleep7010016.	2	1313
22.8	6.1	23.2	7.3	35	Australia	0	Rigney et al	2025	Rigney G, Browne M, Sargent C, Lastella M. Sleep Timing Across the Lifespan of Australian Adults. Clocks Sleep. 2025 Mar 20;7(1):16. doi: 10.3390/clockssleep7010016.	2	1314
22.7	5.9	23.1	7	40	Australia	0	Rigney et al	2025	Rigney G, Browne M, Sargent C, Lastella M. Sleep Timing Across the Lifespan of Australian Adults. Clocks Sleep. 2025 Mar 20;7(1):16. doi: 10.3390/clockssleep7010016.	2	1315
22.6	5.8	23.1	6.8	45	Australia	0	Rigney et al	2025	Rigney G, Browne M, Sargent C, Lastella M. Sleep Timing Across the Lifespan of Australian Adults. Clocks Sleep. 2025 Mar 20;7(1):16. doi: 10.3390/clockssleep7010016.	2	1316
22.5	5.8	23	6.7	50	Australia	0	Rigney et al	2025	Rigney G, Browne M, Sargent C, Lastella M. Sleep Timing Across the Lifespan of Australian Adults. Clocks Sleep. 2025 Mar 20;7(1):16. doi: 10.3390/clockssleep7010016.	2	1317
22.45	5.9	22.9	6.65	55	Australia	0	Rigney et al	2025	Rigney G, Browne M, Sargent C, Lastella M. Sleep Timing Across the Lifespan of Australian Adults. Clocks Sleep. 2025 Mar 20;7(1):16. doi: 10.3390/clockssleep7010016.	2	1318
22.5	6	22.8	6.6	60	Australia	0	Rigney et al	2025	Rigney G, Browne M, Sargent C, Lastella M. Sleep Timing Across the Lifespan of Australian Adults. Clocks Sleep. 2025 Mar 20;7(1):16. doi: 10.3390/clockssleep7010016.	2	1319
22.55	6.2	22.75	6.5	65	Australia	0	Rigney et al	2025	Rigney G, Browne M, Sargent C, Lastella M. Sleep Timing Across the Lifespan of Australian Adults. Clocks Sleep. 2025 Mar 20;7(1):16. doi: 10.3390/clockssleep7010016.	2	1320
22.6	6.4	22.8	6.4	70	Australia	0	Rigney et al	2025	Rigney G, Browne M, Sargent C, Lastella M. Sleep Timing Across the Lifespan of Australian Adults. Clocks Sleep. 2025 Mar 20;7(1):16. doi: 10.3390/clockssleep7010016.	2	1321
21.22	6.3	21.63	7.7	7	China	0	Li et al	2025	Li R, Chen Y, Zhao A, Huang L, Long Z, Kang W, Yin Y, Tong S, Li S. Relationships between Sleep Duration, Timing, Consistency, and Chronotype with Myopia among School-Aged Children. J Ophthalmol. 2022 Jul 19;2022:7071801. doi: 10.1155/2022/7071801.	2	1322
21.64	6.3	21.73	7.75	8	China	0	Li et al	2025	Li R, Chen Y, Zhao A, Huang L, Long Z, Kang W, Yin Y, Tong S, Li S. Relationships between Sleep Duration, Timing, Consistency, and Chronotype with Myopia among School-Aged Children. J Ophthalmol. 2022 Jul 19;2022:7071801. doi: 10.1155/2022/7071801.	2	1323
21.47	6.25	21.77	7.8	9	China	0	Li et al	2025	Li R, Chen Y, Zhao A, Huang L, Long Z, Kang W, Yin Y, Tong S, Li S. Relationships between Sleep Duration, Timing, Consistency, and Chronotype with Myopia among School-Aged Children. J Ophthalmol. 2022 Jul 19;2022:7071801. doi: 10.1155/2022/7071801.	2	1324
21.5	6.2	21.81	7.8	10	China	0	Li et al	2025	Li R, Chen Y, Zhao A, Huang L, Long Z, Kang W, Yin Y, Tong S, Li S. Relationships between Sleep Duration, Timing, Consistency, and Chronotype with Myopia among School-Aged Children. J Ophthalmol. 2022 Jul 19;2022:7071801. doi: 10.1155/2022/7071801.	2	1325
21.5	6.17	21.87	7.85	11	China	0	Li et al	2025	Li R, Chen Y, Zhao A, Huang L, Long Z, Kang W, Yin Y, Tong S, Li S. Relationships between Sleep Duration, Timing, Consistency, and Chronotype with Myopia among School-Aged Children. J Ophthalmol. 2022 Jul 19;2022:7071801. doi: 10.1155/2022/7071801.	2	1326
21.48	6.17	21.84	7.85	12	China	0	Li et al	2025	Li R, Chen Y, Zhao A, Huang L, Long Z, Kang W, Yin Y, Tong S, Li S. Relationships between Sleep Duration, Timing, Consistency, and Chronotype with Myopia among School-Aged Children. J Ophthalmol. 2022 Jul 19;2022:7071801. doi: 10.1155/2022/7071801.	2	1327
23.7833	6.31667	25.2667	9.71667	17.1	USA	0	Hasler et al	2024	Hasler BP, Wallace ML, Graves JL, Witt R, Guo K, Buysse DJ, Siegle GJ, Clark DB. Pre-pandemic circadian phase predicts pandemic alcohol use among adolescents. J Sleep Res. 2024 Feb;33(1):e13905. doi: 10.1111/jsr.13905.	2	1328
23.86	7.35	24.27	8.84	42.3	Korea	0	Kim et al	2025	Kim MH, Kim TJ, Shin JW. Changes in delayed sleep patterns and related clinical factors in a social restriction environment. Chronobiol Int. 2025 Feb;42(2):297-305. doi: 10.1080/07420528.2025.2460655.	2	1329
23.8833	8.20833	24.7833	9.35833	27.1	UK	0	Hickman et al	2025	Hickman R, Lai Jie D, Shergill S, Laborde S, D'Oliveira TC. Validation of the Caen Chronotype Questionnaire: Exploring the added value of amplitude and correlations with actigraphy. Chronobiol Int. 2025 Mar;42(3):378-391. doi: 10.1080/07420528.2025.2471887.	2	1330
24.9333	7.05	26.0333	9.225	20.4	India	0	Singh et al	2025	Singh A., Pande B., Sinha M., Sinha R. Exploring the learning process in college students: Impact of morning and evening chronotypes. Medical Journal Armed Forces India, 2025, https://doi.org/10.1016/j.mjafi.2025.02.001	2	1331
23.463	6.875	24.139	8.894	31.7	Russia	0	Putilov et al	2022	Putilov, A.A.; Sveshnikov, D.S.; Bakaeva, Z.V.; Yakunina, E.B.; Starshinov, Y.P.; Torshin, V.I.; Trutneva, E.A.; Lapkin, M.M.; Lopatskaya, Z.N.; Budkevich, R.O.; et al. The Irrecoverable Loss in Sleep on Weekdays of Two Distinct Chronotypes Can Be Equalized by Permitting a >2 h Difference in Waking Time. Appl. Sci. 2022, 12, 8092. https://doi.org/10.3390/app12168092	2	1332
24.246	6.907	24.969	10.13	19.2	Russia	0	Putilov et al	2022	Putilov, A.A.; Sveshnikov, D.S.; Bakaeva, Z.V.; Yakunina, E.B.; Starshinov, Y.P.; Torshin, V.I.; Trutneva, E.A.; Lapkin, M.M.; Lopatskaya, Z.N.; Budkevich, R.O.; et al. The Irrecoverable Loss in Sleep on Weekdays of Two Distinct Chronotypes Can Be Equalized by Permitting a >2 h Difference in Waking Time. Appl. Sci. 2022, 12, 8092. https://doi.org/10.3390/app12168092	2	1333
24.0667	7.31667	24.5333	9.4	19	China	0	Gong et al	2025	Gong Y, Zhang JX, Li SN, Li LL, Dong XJ, Liu LJ, Fan ZH, Li Y, Yang YD. The relationship between chrononutrition profile, social jet lag and obesity: A cross-sectional study of Chinese college students. Chronobiol Int. 2025 Mar;42(3):328-339. doi: 10.1080/07420528.2025.2464664.	2	1334
24.4167	8.375	26.225	10.8667	19.8	Chile	0	Reyes et al	2025	Reyes S, Algarín C, Blanco E, Peirano P. Longitudinal association between social jetlag, adiposity, and body composition: Sex differences from adolescence to young adulthood. Sleep Health. 2025 Mar 24:S2352-7218(25)00035-X. doi: 10.1016/j.sleh.2025.02.003.	2	1335
23.7167	7.81667	24.3667	9.7	21.1	China	2	Dai et al	2025	Dai J, Xu X, Chen G, Lv J, Xiao Y. Sleep-wake patterns of fencing athletes: a long-term wearable device study. PeerJ. 2025 Jan 14;13:e18812. doi: 10.7717/peerj.18812.	2	1336
22.8083	6.8	23.2333	7.975	49.5	UK	0	Leng et al	2025	Leng Y, Wainwright NW, Cappuccio FP, Surtees PG, Luben R, Wareham N, Brayne C, Khaw KT. Self-reported sleep patterns in a British population cohort. Sleep Med. 2014 Mar;15(3):295-302. doi: 10.1016/j.sleep.2013.10.015.	2	1337
22.7167	7.05	23.0417	7.84167	59.5	UK	0	Leng et al	2025	Leng Y, Wainwright NW, Cappuccio FP, Surtees PG, Luben R, Wareham N, Brayne C, Khaw KT. Self-reported sleep patterns in a British population cohort. Sleep Med. 2014 Mar;15(3):295-302. doi: 10.1016/j.sleep.2013.10.015.	2	1338
22.7167	7.425	22.85	7.675	69.5	UK	0	Leng et al	2025	Leng Y, Wainwright NW, Cappuccio FP, Surtees PG, Luben R, Wareham N, Brayne C, Khaw KT. Self-reported sleep patterns in a British population cohort. Sleep Med. 2014 Mar;15(3):295-302. doi: 10.1016/j.sleep.2013.10.015.	2	1339
22.6	7.43333	22.675	7.58333	80	UK	0	Leng et al	2025	Leng Y, Wainwright NW, Cappuccio FP, Surtees PG, Luben R, Wareham N, Brayne C, Khaw KT. Self-reported sleep patterns in a British population cohort. Sleep Med. 2014 Mar;15(3):295-302. doi: 10.1016/j.sleep.2013.10.015.	2	1339
24.3333	9.56667	25.4167	10.7167	14	Mexico	0	Arrona-Palacios & Dİaz-Morales	2018	Arrona-Palacios A, Díaz-Morales JF. Morningness-eveningness is not associated with academic performance in the afternoon school shift: Preliminary findings. Br J Educ Psychol. 2018;88(3):480-498.	3	256
21.7167	7	22.0667	7.61667	9.7	Japan	0	Komada et al.	2021	Komada, Y., Ishibashi, Y., Hagiwara, S., Kobori, M., Shimura, A. A Longitudinal Study of Subjective Daytime Sleepiness Changes in Elementary School Children Following a Temporary School Closure Due to COVID-19. Children 2021, 8, 183.10.3390/children8030183 https://doi.org/	3	352
23.4833	7.06667	24	8.31667	37.6056	Austria	0	Florea et al	2021	Florea C, Topalidis P, Hauser T, Angerer M, Kurapov A, Beltran Leon CA, Soares Brandão D, Schabus M. Sleep during COVID-19 lockdown: A cross-cultural study investigating job system relevance. Biochem Pharmacol. 2021 Feb 10:114463. doi: 10.1016/j.bcp.2021.114463.	3	430
24.5333	7.88333	25.2	9.2	36.5385	Ukraine	0	Florea et al	2021	Florea C, Topalidis P, Hauser T, Angerer M, Kurapov A, Beltran Leon CA, Soares Brandão D, Schabus M. Sleep during COVID-19 lockdown: A cross-cultural study investigating job system relevance. Biochem Pharmacol. 2021 Feb 10:114463. doi: 10.1016/j.bcp.2021.114463.	3	431
23.85	7.9	24.25	8.76667	41.4516	Greece	0	Florea et al	2021	Florea C, Topalidis P, Hauser T, Angerer M, Kurapov A, Beltran Leon CA, Soares Brandão D, Schabus M. Sleep during COVID-19 lockdown: A cross-cultural study investigating job system relevance. Biochem Pharmacol. 2021 Feb 10:114463. doi: 10.1016/j.bcp.2021.114463.	3	432
23.25	6.9	24.05	8.53333	43.3684	Cuba	0	Florea et al	2021	Florea C, Topalidis P, Hauser T, Angerer M, Kurapov A, Beltran Leon CA, Soares Brandão D, Schabus M. Sleep during COVID-19 lockdown: A cross-cultural study investigating job system relevance. Biochem Pharmacol. 2021 Feb 10:114463. doi: 10.1016/j.bcp.2021.114463.	3	433
23.7167	7.25	24.3667	8.51667	37.6562	Brasil	0	Florea et al	2021	Florea C, Topalidis P, Hauser T, Angerer M, Kurapov A, Beltran Leon CA, Soares Brandão D, Schabus M. Sleep during COVID-19 lockdown: A cross-cultural study investigating job system relevance. Biochem Pharmacol. 2021 Feb 10:114463. doi: 10.1016/j.bcp.2021.114463.	3	434
23.8667	8.05	24.45	9.1	28.6	Germany	0	Staller & Randler	2020	Staller N, Randler C. Changes in sleep schedule and chronotype due to COVID-19 restrictions and home office. Somnologie (Berl). 2020 Nov 17:1-7. doi: 10.1007/s11818-020-00277-2.	3	439
24.3833	8.18333	24.7333	8.93333	40.2	Ireland	0	Raman & Coogan	2021	Raman S, Coogan AN. Effects of societal-level COVID-19 mitigation measures on the timing and quality of sleep in Ireland. Sleep Med. 2021 Feb 15:S1389-9457(21)00122-2. doi: 10.1016/j.sleep.2021.02.024.	3	441
23.8333	8.4	23.8	8.45	12	India	0	Dutta et al	2020	Dutta K, Mukherjee R, Sen D & Sahu S.Effect of COVID-19 lockdown on sleep behavior and screen exposure time: an observational study among Indian school children, Biological Rhythm Research, 2020. DOI: 10.1080/09291016.2020.1825284	3	479
[truncated: 1,089 more rows]

## Sheet: 87 samples (lockdown)
Supplementary Table 2. Before and during lockdown
During				Before
Weekdays		Weekends		Weekdays		Weekends
[truncated: 90 more rows]

## Sheet: 100 samples (school start time)
Supplementary Table 3. Early and later school start time
[truncated: 105 more rows]
